# Supplementary material for: Inflammation and immune activation are associated with risk of Mycobacterium tuberculosis infection in BCG-vaccinated infants
Source: Research Square preprint supplement (doi:10.21203/rs.3.rs-1632594/v1), 2022-05-17
Supplement: Supplementary file 1 [file 0302f4afde2ff832375faac5.xlsx]

## Sheet: Supplementary table 10
Supplementary table 10: Gene sets enrichment results using overrepresentation test and gene sets defined by GO database.
M.tb-infected vs M.tb-uninfected (All infants) Upregulated gene sets
ID	Description	GeneRatio	BgRatio	pvalue	p.adjust	qvalue	geneID	Count
GO:0006958	complement activation, classical pathway	55/443	137/18493	3.60125e-53	1.24747e-49	1.21116e-49	IGKC/IGKV4-1/IGKV5-2/IGLV1-51/IGLV1-47/IGLV1-44/IGLV7-43/IGLV3-27/IGLV3-25/IGLV2-23/IGLV3-21/IGLV3-19/IGLV2-14/IGLV2-11/IGLV3-1/IGLC2/IGLC3/IGLC7/IGHE/IGHG4/IGHA1/IGHG1/IGHG3/IGHV1-3/IGHV3-11/IGHV3-15/IGHV1-18/IGHV3-21/IGHV3-23/IGHV3-33/IGHV4-39/IGHV3-48/IGHV3-49/IGHV5-51/IGHV1-58/IGHV3-66/IGLC6/IGHV3-64/IGHV4-59/IGHV3-74/IGHV3-72/IGHV3-43/IGKV2D-30/IGKV3-20/IGKV1D-33/IGKV1-16/IGKV1-39/IGKV2-30/I…	55
GO:0002455	humoral immune response mediated by circulating immunoglobulin	56/443	149/18493	3.36955e-52	5.83606e-49	5.66616e-49	FCGR2B/IGKC/IGKV4-1/IGKV5-2/IGLV1-51/IGLV1-47/IGLV1-44/IGLV7-43/IGLV3-27/IGLV3-25/IGLV2-23/IGLV3-21/IGLV3-19/IGLV2-14/IGLV2-11/IGLV3-1/IGLC2/IGLC3/IGLC7/IGHE/IGHG4/IGHA1/IGHG1/IGHG3/IGHV1-3/IGHV3-11/IGHV3-15/IGHV1-18/IGHV3-21/IGHV3-23/IGHV3-33/IGHV4-39/IGHV3-48/IGHV3-49/IGHV5-51/IGHV1-58/IGHV3-66/IGLC6/IGHV3-64/IGHV4-59/IGHV3-74/IGHV3-72/IGHV3-43/IGKV2D-30/IGKV3-20/IGKV1D-33/IGKV1-16/IGKV1-39/IGK…	56
GO:0006956	complement activation	56/443	170/18493	1.881e-48	2.17193e-45	2.1087e-45	PHB/IGKC/IGKV4-1/IGKV5-2/IGLV1-51/IGLV1-47/IGLV1-44/IGLV7-43/IGLV3-27/IGLV3-25/IGLV2-23/IGLV3-21/IGLV3-19/IGLV2-14/IGLV2-11/IGLV3-1/IGLC2/IGLC3/IGLC7/IGHE/IGHG4/IGHA1/IGHG1/IGHG3/IGHV1-3/IGHV3-11/IGHV3-15/IGHV1-18/IGHV3-21/IGHV3-23/IGHV3-33/IGHV4-39/IGHV3-48/IGHV3-49/IGHV5-51/IGHV1-58/IGHV3-66/IGLC6/IGHV3-64/IGHV4-59/IGHV3-74/IGHV3-72/IGHV3-43/IGKV2D-30/IGKV3-20/IGKV1D-33/IGKV1-16/IGKV1-39/IGKV2-…	56
GO:0016064	immunoglobulin mediated immune response	58/443	212/18493	5.88756e-45	4.5744e-42	4.44124e-42	CD74/FCGR2B/AICDA/IGKC/IGKV4-1/IGKV5-2/IGLV1-51/IGLV1-47/IGLV1-44/IGLV7-43/IGLV3-27/IGLV3-25/IGLV2-23/IGLV3-21/IGLV3-19/IGLV2-14/IGLV2-11/IGLV3-1/IGLC2/IGLC3/IGLC7/IGHE/IGHG4/IGHA1/IGHG1/IGHG3/IGHV1-3/IGHV3-11/IGHV3-15/IGHV1-18/IGHV3-21/IGHV3-23/IGHV3-33/IGHV4-39/IGHV3-48/IGHV3-49/IGHV5-51/IGHV1-58/IGHV3-66/IGLC6/IGHV3-64/IGHV4-59/IGHV3-74/IGHV3-72/IGHV3-43/IGKV2D-30/IGKV3-20/IGKV1D-33/IGKV1-16/I…	58
GO:0019724	B cell mediated immunity	58/443	213/18493	7.92333e-45	4.5744e-42	4.44124e-42	CD74/FCGR2B/AICDA/IGKC/IGKV4-1/IGKV5-2/IGLV1-51/IGLV1-47/IGLV1-44/IGLV7-43/IGLV3-27/IGLV3-25/IGLV2-23/IGLV3-21/IGLV3-19/IGLV2-14/IGLV2-11/IGLV3-1/IGLC2/IGLC3/IGLC7/IGHE/IGHG4/IGHA1/IGHG1/IGHG3/IGHV1-3/IGHV3-11/IGHV3-15/IGHV1-18/IGHV3-21/IGHV3-23/IGHV3-33/IGHV4-39/IGHV3-48/IGHV3-49/IGHV5-51/IGHV1-58/IGHV3-66/IGLC6/IGHV3-64/IGHV4-59/IGHV3-74/IGHV3-72/IGHV3-43/IGKV2D-30/IGKV3-20/IGKV1D-33/IGKV1-16/I…	58
GO:0006959	humoral immune response	65/443	349/18493	4.28432e-39	2.12012e-36	2.0584e-36	FCGR2B/MEF2C/LY86/CCR2/CXCL6/BST2/JCHAIN/CXCL1/PHB/CCL13/IGKC/IGKV4-1/IGKV5-2/IGLV1-51/IGLV1-47/IGLV1-44/IGLV7-43/IGLV3-27/IGLV3-25/IGLV2-23/IGLV3-21/IGLV3-19/IGLV2-14/IGLV2-11/IGLV3-1/IGLC2/IGLC3/IGLC7/IGHE/IGHG4/IGHA1/IGHG1/IGHG3/IGHV1-3/IGHV3-11/IGHV3-15/IGHV1-18/IGHV3-21/IGHV3-23/IGHV3-33/IGHV4-39/IGHV3-48/IGHV3-49/IGHV5-51/IGHV1-58/IGHV3-66/IGLC6/IGHV3-64/IGHV4-59/IGHV3-74/IGHV3-72/IGHV3-43/…	65
GO:0030449	regulation of complement activation	39/443	107/18493	6.48681e-36	2.80879e-33	2.72702e-33	PHB/IGKC/IGKV4-1/IGKV5-2/IGLV1-51/IGLV1-47/IGLV1-44/IGLV7-43/IGLV3-27/IGLV3-25/IGLV2-23/IGLV3-21/IGLV3-19/IGLV2-14/IGLV2-11/IGLV3-1/IGLC7/IGHG4/IGHG1/IGHG3/IGHV3-11/IGHV3-23/IGHV3-33/IGHV4-39/IGHV3-48/IGLC6/IGHV4-59/IGKV2D-30/IGKV3-20/IGKV1D-33/IGKV1-16/IGKV1-39/IGKV2-30/IGKV1-12/IGKV1-5/IGKV2-28/IGKV3-15/IGKV1D-39/IGLV2-8	39
GO:0002429	immune response-activating cell surface receptor signaling pathway	66/443	414/18493	2.39421e-35	7.83749e-33	7.60932e-33	FCGR2B/MEF2C/ELMO1/VAV2/MNDA/ACTG1/HLA-DRA/NCR3/IGKC/IGKV4-1/IGKV5-2/IGLV1-51/IGLV1-47/IGLV1-44/IGLV7-43/IGLV3-27/IGLV3-25/IGLV2-23/IGLV3-21/IGLV3-19/IGLV2-14/IGLV2-11/IGLV3-1/IGLC2/IGLC3/IGLC7/IGHE/IGHG4/IGHA1/IGHG1/IGHG3/IGHV1-3/IGHV3-11/IGHV3-15/IGHV1-18/IGHV3-21/IGHV3-23/IGHV3-33/IGHV4-39/IGHV3-48/IGHV3-49/IGHV5-51/IGHV1-58/IGHV3-66/IGLC6/IGHV3-64/HLA-DPB1/IGHV4-59/IGHV3-74/IGHV3-72/HLA-DPA1/…	66
GO:0002433	immune response-regulating cell surface receptor signaling pathway involved in phagocytosis	42/443	135/18493	2.71506e-35	7.83749e-33	7.60932e-33	FCGR2B/ELMO1/VAV2/ACTG1/IGKC/IGKV4-1/IGKV5-2/IGLV1-51/IGLV1-47/IGLV1-44/IGLV7-43/IGLV3-27/IGLV3-25/IGLV2-23/IGLV3-21/IGLV3-19/IGLV2-14/IGLV2-11/IGLV3-1/IGLC7/IGHG4/IGHG1/IGHG3/IGHV3-11/IGHV3-23/IGHV3-33/IGHV4-39/IGHV3-48/IGLC6/IGHV4-59/IGKV2D-30/IGKV3-20/IGKV1D-33/IGKV1-16/IGKV1-39/IGKV2-30/IGKV1-12/IGKV1-5/IGKV2-28/IGKV3-15/IGKV1D-39/IGLV2-8	42
GO:0038096	Fc-gamma receptor signaling pathway involved in phagocytosis	42/443	135/18493	2.71506e-35	7.83749e-33	7.60932e-33	FCGR2B/ELMO1/VAV2/ACTG1/IGKC/IGKV4-1/IGKV5-2/IGLV1-51/IGLV1-47/IGLV1-44/IGLV7-43/IGLV3-27/IGLV3-25/IGLV2-23/IGLV3-21/IGLV3-19/IGLV2-14/IGLV2-11/IGLV3-1/IGLC7/IGHG4/IGHG1/IGHG3/IGHV3-11/IGHV3-23/IGHV3-33/IGHV4-39/IGHV3-48/IGLC6/IGHV4-59/IGKV2D-30/IGKV3-20/IGKV1D-33/IGKV1-16/IGKV1-39/IGKV2-30/IGKV1-12/IGKV1-5/IGKV2-28/IGKV3-15/IGKV1D-39/IGLV2-8	42
GO:0038094	Fc-gamma receptor signaling pathway	42/443	138/18493	7.63366e-35	2.03408e-32	1.97486e-32	FCGR2B/ELMO1/VAV2/ACTG1/IGKC/IGKV4-1/IGKV5-2/IGLV1-51/IGLV1-47/IGLV1-44/IGLV7-43/IGLV3-27/IGLV3-25/IGLV2-23/IGLV3-21/IGLV3-19/IGLV2-14/IGLV2-11/IGLV3-1/IGLC7/IGHG4/IGHG1/IGHG3/IGHV3-11/IGHV3-23/IGHV3-33/IGHV4-39/IGHV3-48/IGLC6/IGHV4-59/IGKV2D-30/IGKV3-20/IGKV1D-33/IGKV1-16/IGKV1-39/IGKV2-30/IGKV1-12/IGKV1-5/IGKV2-28/IGKV3-15/IGKV1D-39/IGLV2-8	42
GO:0002460	adaptive immune response based on somatic recombination of immune receptors built from immunoglobulin superfamily domains	61/443	354/18493	1.15585e-34	2.85989e-32	2.77664e-32	CD74/FCGR2B/MEF2C/AICDA/CCR2/CD1C/IGKC/IGKV4-1/IGKV5-2/IGLV1-51/IGLV1-47/IGLV1-44/IGLV7-43/IGLV3-27/IGLV3-25/IGLV2-23/IGLV3-21/IGLV3-19/IGLV2-14/IGLV2-11/IGLV3-1/IGLC2/IGLC3/IGLC7/IGHE/IGHG4/IGHA1/IGHG1/IGHG3/IGHV1-3/IGHV3-11/IGHV3-15/IGHV1-18/IGHV3-21/IGHV3-23/IGHV3-33/IGHV4-39/IGHV3-48/IGHV3-49/IGHV5-51/IGHV1-58/IGHV3-66/IGLC6/IGHV3-64/IGHV4-59/IGHV3-74/IGHV3-72/IGHV3-43/IGKV2D-30/IGKV3-20/IGKV…	61
GO:0002431	Fc receptor mediated stimulatory signaling pathway	42/443	140/18493	1.49681e-34	3.24059e-32	3.14626e-32	FCGR2B/ELMO1/VAV2/ACTG1/IGKC/IGKV4-1/IGKV5-2/IGLV1-51/IGLV1-47/IGLV1-44/IGLV7-43/IGLV3-27/IGLV3-25/IGLV2-23/IGLV3-21/IGLV3-19/IGLV2-14/IGLV2-11/IGLV3-1/IGLC7/IGHG4/IGHG1/IGHG3/IGHV3-11/IGHV3-23/IGHV3-33/IGHV4-39/IGHV3-48/IGLC6/IGHV4-59/IGKV2D-30/IGKV3-20/IGKV1D-33/IGKV1-16/IGKV1-39/IGKV2-30/IGKV1-12/IGKV1-5/IGKV2-28/IGKV3-15/IGKV1D-39/IGLV2-8	42
GO:0002449	lymphocyte mediated immunity	60/443	344/18493	2.08944e-34	4.25753e-32	4.13359e-32	CD74/FCGR2B/AICDA/CD1C/NCR3/IGKC/IGKV4-1/IGKV5-2/IGLV1-51/IGLV1-47/IGLV1-44/IGLV7-43/IGLV3-27/IGLV3-25/IGLV2-23/IGLV3-21/IGLV3-19/IGLV2-14/IGLV2-11/IGLV3-1/IGLC2/IGLC3/IGLC7/IGHE/IGHG4/IGHA1/IGHG1/IGHG3/IGHV1-3/IGHV3-11/IGHV3-15/IGHV1-18/IGHV3-21/IGHV3-23/IGHV3-33/IGHV4-39/IGHV3-48/IGHV3-49/IGHV5-51/IGHV1-58/IGHV3-66/IGLC6/IGHV3-64/IGHV4-59/IGHV3-74/IGHV3-72/IGHV3-43/IGKV2D-30/IGKV3-20/IGKV1D-33/…	60
GO:0002920	regulation of humoral immune response	40/443	126/18493	4.77705e-34	9.19317e-32	8.92554e-32	FCGR2B/PHB/IGKC/IGKV4-1/IGKV5-2/IGLV1-51/IGLV1-47/IGLV1-44/IGLV7-43/IGLV3-27/IGLV3-25/IGLV2-23/IGLV3-21/IGLV3-19/IGLV2-14/IGLV2-11/IGLV3-1/IGLC7/IGHG4/IGHG1/IGHG3/IGHV3-11/IGHV3-23/IGHV3-33/IGHV4-39/IGHV3-48/IGLC6/IGHV4-59/IGKV2D-30/IGKV3-20/IGKV1D-33/IGKV1-16/IGKV1-39/IGKV2-30/IGKV1-12/IGKV1-5/IGKV2-28/IGKV3-15/IGKV1D-39/IGLV2-8	40
GO:0002768	immune response-regulating cell surface receptor signaling pathway	66/443	445/18493	2.21135e-33	4.03164e-31	3.91427e-31	FCGR2B/MEF2C/ELMO1/VAV2/MNDA/ACTG1/HLA-DRA/NCR3/IGKC/IGKV4-1/IGKV5-2/IGLV1-51/IGLV1-47/IGLV1-44/IGLV7-43/IGLV3-27/IGLV3-25/IGLV2-23/IGLV3-21/IGLV3-19/IGLV2-14/IGLV2-11/IGLV3-1/IGLC2/IGLC3/IGLC7/IGHE/IGHG4/IGHA1/IGHG1/IGHG3/IGHV1-3/IGHV3-11/IGHV3-15/IGHV1-18/IGHV3-21/IGHV3-23/IGHV3-33/IGHV4-39/IGHV3-48/IGHV3-49/IGHV5-51/IGHV1-58/IGHV3-66/IGLC6/IGHV3-64/HLA-DPB1/IGHV4-59/IGHV3-74/IGHV3-72/HLA-DPA1/…	66
GO:0038095	Fc-epsilon receptor signaling pathway	37/443	117/18493	1.71248e-31	2.82478e-29	2.74255e-29	VAV2/IGKC/IGKV4-1/IGKV5-2/IGLV1-51/IGLV1-47/IGLV1-44/IGLV7-43/IGLV3-27/IGLV3-25/IGLV2-23/IGLV3-21/IGLV3-19/IGLV2-14/IGLV2-11/IGLV3-1/IGLC7/IGHE/IGHV3-11/IGHV3-23/IGHV3-33/IGHV4-39/IGHV3-48/IGLC6/IGHV4-59/IGKV2D-30/IGKV3-20/IGKV1D-33/IGKV1-16/IGKV1-39/IGKV2-30/IGKV1-12/IGKV1-5/IGKV2-28/IGKV3-15/IGKV1D-39/IGLV2-8	37
GO:0002377	immunoglobulin production	43/443	180/18493	9.20886e-31	1.44998e-28	1.40777e-28	FCGR2B/AICDA/MZB1/IGKC/IGKV4-1/IGKV5-2/IGKV6-21/IGLV4-69/IGLV4-60/IGLV10-54/IGLV1-51/IGLV1-47/IGLV7-46/IGLV5-45/IGLV1-44/IGLV7-43/IGLV3-27/IGLV3-25/IGLV2-23/IGLV3-21/IGLV3-19/IGLV3-16/IGLV2-14/IGLV2-11/IGLV3-10/IGLV3-9/IGLV3-1/IGLV9-49/IGKV6D-21/IGKV2D-30/IGKV1-6/IGKV3-20/IGKV1D-33/IGKV1-16/IGKV1-39/IGKV2-30/IGKV2D-29/IGKV1-12/IGKV1-5/IGKV2-28/IGKV3-15/IGKV1D-39/IGLV2-8	43
GO:0038093	Fc receptor signaling pathway	43/443	187/18493	5.10553e-30	7.68937e-28	7.46552e-28	FCGR2B/ELMO1/VAV2/ACTG1/IGKC/IGKV4-1/IGKV5-2/IGLV1-51/IGLV1-47/IGLV1-44/IGLV7-43/IGLV3-27/IGLV3-25/IGLV2-23/IGLV3-21/IGLV3-19/IGLV2-14/IGLV2-11/IGLV3-1/IGLC7/IGHE/IGHG4/IGHG1/IGHG3/IGHV3-11/IGHV3-23/IGHV3-33/IGHV4-39/IGHV3-48/IGLC6/IGHV4-59/IGKV2D-30/IGKV3-20/IGKV1D-33/IGKV1-16/IGKV1-39/IGKV2-30/IGKV1-12/IGKV1-5/IGKV2-28/IGKV3-15/IGKV1D-39/IGLV2-8	43
GO:0002440	production of molecular mediator of immune response	45/443	268/18493	3.18146e-25	3.93592e-23	3.82134e-23	CD74/FCGR2B/AICDA/BST2/MZB1/IGKC/IGKV4-1/IGKV5-2/IGKV6-21/IGLV4-69/IGLV4-60/IGLV10-54/IGLV1-51/IGLV1-47/IGLV7-46/IGLV5-45/IGLV1-44/IGLV7-43/IGLV3-27/IGLV3-25/IGLV2-23/IGLV3-21/IGLV3-19/IGLV3-16/IGLV2-14/IGLV2-11/IGLV3-10/IGLV3-9/IGLV3-1/IGLV9-49/IGKV6D-21/IGKV2D-30/IGKV1-6/IGKV3-20/IGKV1D-33/IGKV1-16/IGKV1-39/IGKV2-30/IGKV2D-29/IGKV1-12/IGKV1-5/IGKV2-28/IGKV3-15/IGKV1D-39/IGLV2-8	45
GO:0050853	B cell receptor signaling pathway	31/443	122/18493	2.44971e-23	2.65181e-21	2.57461e-21	MEF2C/MNDA/IGKC/IGLC2/IGLC3/IGLC7/IGHE/IGHG4/IGHA1/IGHG1/IGHG3/IGHV1-3/IGHV3-11/IGHV3-15/IGHV1-18/IGHV3-21/IGHV3-23/IGHV3-33/IGHV4-39/IGHV3-48/IGHV3-49/IGHV5-51/IGHV1-58/IGHV3-66/IGLC6/IGHV3-64/IGHV4-59/IGHV3-74/IGHV3-72/IGHV3-43/IGHV4-4	31
GO:0050864	regulation of B cell activation	35/443	183/18493	9.01885e-22	9.46706e-20	9.19146e-20	CD74/FCGR2B/MEF2C/MNDA/MZB1/IGKC/IGLC2/IGLC3/IGLC7/IGHE/IGHG4/IGHA1/IGHG1/IGHG3/IGHV1-3/IGHV3-11/IGHV3-15/IGHV1-18/IGHV3-21/IGHV3-23/IGHV3-33/IGHV4-39/IGHV3-48/IGHV3-49/IGHV5-51/IGHV1-58/IGHV3-66/IGLC6/IGHV3-64/IGHV4-59/IGHV3-74/IGHV3-72/IGHV3-43/TNFRSF13B/IGHV4-4	35
GO:0050871	positive regulation of B cell activation	31/443	144/18493	5.15088e-21	5.24784e-19	5.09507e-19	CD74/MEF2C/IGKC/IGLC2/IGLC3/IGLC7/IGHE/IGHG4/IGHA1/IGHG1/IGHG3/IGHV1-3/IGHV3-11/IGHV3-15/IGHV1-18/IGHV3-21/IGHV3-23/IGHV3-33/IGHV4-39/IGHV3-48/IGHV3-49/IGHV5-51/IGHV1-58/IGHV3-66/IGLC6/IGHV3-64/IGHV4-59/IGHV3-74/IGHV3-72/IGHV3-43/IGHV4-4	31
GO:0002697	regulation of immune effector process	50/443	439/18493	3.408e-20	3.27925e-18	3.18379e-18	CD74/FCGR2B/CCR2/CXCL6/EIF2AK4/BST2/CD1C/AIM2/PHB/MZB1/IFIT1/NCR3/IGKC/IGKV4-1/IGKV5-2/IGLV1-51/IGLV1-47/IGLV1-44/IGLV7-43/IGLV3-27/IGLV3-25/IGLV2-23/IGLV3-21/IGLV3-19/IGLV2-14/IGLV2-11/IGLV3-1/IGLC7/IGHG4/IGHG1/IGHG3/IGHV3-11/IGHV3-23/IGHV3-33/IGHV4-39/IGHV3-48/IGLC6/IGHV4-59/IGKV2D-30/IGKV3-20/IGKV1D-33/IGKV1-16/IGKV1-39/IGKV2-30/IGKV1-12/IGKV1-5/IGKV2-28/IGKV3-15/IGKV1D-39/IGLV2-8	50
GO:0042113	B cell activation	39/443	303/18493	8.62357e-18	7.86107e-16	7.63222e-16	CD74/BAK1/FCGR2B/MEF2C/AICDA/BST2/DCLRE1C/MNDA/MZB1/IGKC/IGLC2/IGLC3/IGLC7/IGHE/IGHG4/IGHA1/IGHG1/IGHG3/IGHV1-3/IGHV3-11/IGHV3-15/IGHV1-18/IGHV3-21/IGHV3-23/IGHV3-33/IGHV4-39/IGHV3-48/IGHV3-49/IGHV5-51/IGHV1-58/IGHV3-66/IGLC6/IGHV3-64/IGHV4-59/IGHV3-74/IGHV3-72/IGHV3-43/TNFRSF13B/IGHV4-4	39
GO:0050851	antigen receptor-mediated signaling pathway	35/443	259/18493	9.51255e-17	8.4491e-15	8.20313e-15	MEF2C/MNDA/HLA-DRA/IGKC/IGLC2/IGLC3/IGLC7/IGHE/IGHG4/IGHA1/IGHG1/IGHG3/IGHV1-3/IGHV3-11/IGHV3-15/IGHV1-18/IGHV3-21/IGHV3-23/IGHV3-33/IGHV4-39/IGHV3-48/IGHV3-49/IGHV5-51/IGHV1-58/IGHV3-66/IGLC6/IGHV3-64/HLA-DPB1/IGHV4-59/IGHV3-74/IGHV3-72/HLA-DPA1/IGHV3-43/HLA-DQA2/IGHV4-4	35
GO:0050900	leukocyte migration	46/443	478/18493	8.62897e-16	7.29042e-14	7.07819e-14	CD74/PADI2/CCR2/CXCL6/JCHAIN/GPR15/CXCL1/FUT7/CCL13/GCNT1/IGKC/IGKV4-1/IGKV5-2/IGLV1-51/IGLV1-47/IGLV1-44/IGLV7-43/IGLV3-27/IGLV3-25/IGLV2-23/IGLV3-21/IGLV3-19/IGLV2-14/IGLV2-11/IGLV3-1/IGLC7/IGHA1/IGHV3-11/IGHV3-23/IGHV3-33/IGHV4-39/IGHV3-48/IGLC6/IGHV4-59/IGKV2D-30/IGKV3-20/IGKV1D-33/IGKV1-16/IGKV1-39/IGKV2-30/IGKV1-12/IGKV1-5/IGKV2-28/IGKV3-15/IGKV1D-39/IGLV2-8	46
GO:0051251	positive regulation of lymphocyte activation	36/443	333/18493	4.08463e-14	3.21572e-12	3.12211e-12	CD74/MEF2C/GPAM/CCR2/CLECL1/IGKC/IGLC2/IGLC3/IGLC7/IGHE/IGHG4/IGHA1/IGHG1/IGHG3/IGHV1-3/IGHV3-11/IGHV3-15/IGHV1-18/IGHV3-21/IGHV3-23/IGHV3-33/IGHV4-39/IGHV3-48/IGHV3-49/IGHV5-51/IGHV1-58/IGHV3-66/IGLC6/IGHV3-64/HLA-DPB1/IGHV4-59/IGHV3-74/IGHV3-72/HLA-DPA1/IGHV3-43/IGHV4-4	36
GO:0051249	regulation of lymphocyte activation	41/443	472/18493	1.04097e-12	8.01318e-11	7.77991e-11	CD74/FCGR2B/MEF2C/GPAM/CCR2/MNDA/MZB1/CLECL1/HLA-DOA/IGKC/IGLC2/IGLC3/IGLC7/IGHE/IGHG4/IGHA1/IGHG1/IGHG3/IGHV1-3/IGHV3-11/IGHV3-15/IGHV1-18/IGHV3-21/IGHV3-23/IGHV3-33/IGHV4-39/IGHV3-48/IGHV3-49/IGHV5-51/IGHV1-58/IGHV3-66/IGLC6/IGHV3-64/HLA-DPB1/IGHV4-59/IGHV3-74/IGHV3-72/HLA-DPA1/IGHV3-43/TNFRSF13B/IGHV4-4	41
GO:0002696	positive regulation of leukocyte activation	36/443	372/18493	1.15843e-12	8.72348e-11	8.46952e-11	CD74/MEF2C/GPAM/CCR2/CLECL1/IGKC/IGLC2/IGLC3/IGLC7/IGHE/IGHG4/IGHA1/IGHG1/IGHG3/IGHV1-3/IGHV3-11/IGHV3-15/IGHV1-18/IGHV3-21/IGHV3-23/IGHV3-33/IGHV4-39/IGHV3-48/IGHV3-49/IGHV5-51/IGHV1-58/IGHV3-66/IGLC6/IGHV3-64/HLA-DPB1/IGHV4-59/IGHV3-74/IGHV3-72/HLA-DPA1/IGHV3-43/IGHV4-4	36
M.tb-infected vs M.tb-uninfected (CMV-infected infants) Upregulated gene sets
ID	Description	GeneRatio	BgRatio	pvalue	p.adjust	qvalue	geneID	Count
GO:0002431	Fc receptor mediated stimulatory signaling pathway	66/1875	140/18493	3.50665e-29	1.03008e-25	8.9641e-26	FCGR2B/ACTB/ABL1/HCK/LIMK1/ARPC3/NR4A3/VAV3/RAC1/ACTR2/FCGR1A/DOCK1/VAV2/ARPC5/SYK/PRKCE/GRB2/ACTG1/PLSCR1/MYO1C/PLCG2/FCGR3A/IGKC/IGKV4-1/IGKV5-2/IGKV3D-11/IGLV1-51/IGLV1-47/IGLV1-44/IGLV7-43/IGLV1-40/IGLV3-27/IGLV2-23/IGLV3-19/IGLV2-14/IGLV2-11/IGLV3-1/IGLC7/IGHG4/IGHG1/IGHV2-5/IGHV3-11/IGHV3-23/IGHV3-33/IGHV4-34/IGHV4-39/IGHV3-48/IGLC6/IGHV4-59/IGKV2D-30/IGKV3-20/IGKV1D-33/IGKV1-17/IGKV1-16/AR…	66
GO:0016064	immunoglobulin mediated immune response	80/1875	212/18493	5.82774e-27	4.27974e-24	3.72438e-24	BTK/CD74/POU2F2/FCGR2B/MLH1/CD40/TLR8/NBN/C5/PTPN6/AICDA/NECTIN2/SWAP70/IL10/SERPING1/INPP5D/CLCF1/GAPT/IRF7/C17orf99/IGKC/IGKV4-1/IGKV5-2/IGKV3D-11/IGLV1-51/IGLV1-47/IGLV1-44/IGLV7-43/IGLV1-40/IGLV3-27/IGLV2-23/IGLV3-19/IGLV2-14/IGLV2-11/IGLV3-1/IGLC2/IGLC3/IGLC7/TRDC/IGHA2/IGHE/IGHG4/IGHA1/IGHG1/IGHD/IGHM/IGHV1-3/IGHV2-5/IGHV3-11/IGHV3-15/IGHV1-18/IGHV3-21/IGHV3-23/IGHV3-33/IGHV4-34/IGHV4-39/IG…	80
GO:0006958	complement activation, classical pathway	62/1875	137/18493	2.8927e-26	1.69946e-23	1.47893e-23	C5/SERPING1/IGKC/IGKV4-1/IGKV5-2/IGKV3D-11/IGLV1-51/IGLV1-47/IGLV1-44/IGLV7-43/IGLV1-40/IGLV3-27/IGLV2-23/IGLV3-19/IGLV2-14/IGLV2-11/IGLV3-1/IGLC2/IGLC3/IGLC7/TRDC/IGHA2/IGHE/IGHG4/IGHA1/IGHG1/IGHD/IGHM/IGHV1-3/IGHV2-5/IGHV3-11/IGHV3-15/IGHV1-18/IGHV3-21/IGHV3-23/IGHV3-33/IGHV4-34/IGHV4-39/IGHV3-48/IGHV5-51/IGHV1-58/IGHV3-66/IGLC6/IGHV3-64/IGHV4-59/IGHV3-72/IGHV3-43/IGKV2D-30/IGKV3-20/IGKV1D-33/I…	62
GO:0002449	lymphocyte mediated immunity	104/1875	344/18493	1.60022e-25	7.59445e-23	6.60895e-23	BTK/HFE/CD74/SLAMF7/POU2F2/RAB27A/FCGR2B/MLH1/STX7/LAG3/ICAM1/CD40/JAG1/TLR8/CTSH/NBN/LILRB1/C5/PPP3CB/CTSC/PTPN6/AICDA/PRDX1/SASH3/RIPK3/NECTIN2/TRPM4/SWAP70/RSAD2/KLRD1/IL10/LYST/SERPING1/CD1C/NLRP3/SLAMF6/AP1G1/INPP5D/LGALS9/CLCF1/GAPT/IRF7/C17orf99/IGKC/IGKV4-1/IGKV5-2/IGKV3D-11/IGLV1-51/IGLV1-47/IGLV1-44/IGLV7-43/IGLV1-40/IGLV3-27/IGLV2-23/IGLV3-19/IGLV2-14/IGLV2-11/IGLV3-1/IGLC2/IGLC3/IGLC7…	104
GO:0002697	regulation of immune effector process	115/1875	439/18493	2.70336e-22	9.92641e-20	8.63831e-20	BTK/HFE/CD74/CD84/FCGR2B/MLH1/STX7/ZMPSTE24/LAG3/MUL1/CD40/PYCARD/RIPK2/LILRB1/C5/DDX58/PPP3CB/DHX58/PTPN6/TRIM38/CD86/NR4A3/CD80/CCR2/SASH3/CXCL6/FFAR2/APOBEC3F/EIF2AK4/RIPK3/NECTIN2/BST2/TRPM4/RSAD2/IL10/TLR4/DDX60/PARP9/SEMA7A/HERC5/SERPING1/CD1C/ABR/ZBTB7B/FCRL3/NLRP3/SLAMF6/AIM2/DTX3L/IL15/CGAS/SYK/AP1G1/LGALS9/PTAFR/ITGAM/MZB1/C3AR1/CLCF1/A2M/CD19/GATA2/ELMOD2/NPLOC4/FES/IFNLR1/IFIT1/C17orf…	115
GO:0030449	regulation of complement activation	46/1875	107/18493	9.92636e-19	2.91587e-16	2.53749e-16	C5/SERPING1/C3AR1/A2M/CD19/IGKC/IGKV4-1/IGKV5-2/IGKV3D-11/IGLV1-51/IGLV1-47/IGLV1-44/IGLV7-43/IGLV1-40/IGLV3-27/IGLV2-23/IGLV3-19/IGLV2-14/IGLV2-11/IGLV3-1/IGLC7/IGHG4/IGHG1/IGHV2-5/IGHV3-11/IGHV3-23/IGHV3-33/IGHV4-34/IGHV4-39/IGHV3-48/IGLC6/IGHV4-59/IGKV2D-30/IGKV3-20/IGKV1D-33/IGKV1-17/IGKV1-16/IGKV1-39/IGKV2D-28/IGKV2-30/IGKV1-12/IGKV1-5/IGKV3-15/IGKV1D-39/IGLV2-8/IGKV1D-12	46
GO:0002920	regulation of humoral immune response	50/1875	126/18493	1.9486e-18	5.20364e-16	4.52839e-16	FCGR2B/ACOD1/C5/PTPN6/SERPING1/CXCL13/C3AR1/A2M/CD19/IGKC/IGKV4-1/IGKV5-2/IGKV3D-11/IGLV1-51/IGLV1-47/IGLV1-44/IGLV7-43/IGLV1-40/IGLV3-27/IGLV2-23/IGLV3-19/IGLV2-14/IGLV2-11/IGLV3-1/IGLC7/IGHG4/IGHG1/IGHV2-5/IGHV3-11/IGHV3-23/IGHV3-33/IGHV4-34/IGHV4-39/IGHV3-48/IGLC6/IGHV4-59/IGKV2D-30/IGKV3-20/IGKV1D-33/IGKV1-17/IGKV1-16/IGKV1-39/IGKV2D-28/IGKV2-30/IGKV1-12/IGKV1-5/IGKV3-15/IGKV1D-39/IGLV2-8/IGK…	50
GO:0051607	defense response to virus	70/1875	228/18493	5.55843e-18	1.36066e-15	1.18409e-15	EIF2AK2/HYAL2/ZMPSTE24/OAS1/MUL1/CD40/TLR8/PYCARD/LILRB1/DDX58/DHX58/UNC93B1/OAS3/OAS2/AICDA/TRIM38/POLR3G/IFIH1/IFIT3/IFIT2/TRIM25/NT5C3A/IFI6/APOBEC3A/APOBEC3F/IRF5/EIF2AK4/BST2/TRIM5/TRIM22/RSAD2/OASL/RNASEL/RTP4/DDX60/IFI44L/PARP9/HERC5/PML/IFITM3/LYST/IFIT5/MX1/ADAR/NLRP3/IFI16/AIM2/DTX3L/IL15/CGAS/IFI27/RNASE6/STAT2/ISG20/ELMOD2/APOBEC3B/NPLOC4/MX2/TBK1/IFITM2/IFNLR1/IRF7/IFIT1/ISG15/PLSCR1…	70
GO:0042113	B cell activation	83/1875	303/18493	1.1156e-17	2.52082e-15	2.19371e-15	SKAP2/CD79B/BTK/CD74/POU2F2/BAK1/HDAC9/FCGR2B/MLH1/MEF2C/BLNK/ABL1/CD40/NBN/IL7/LYL1/CD79A/PTPN6/AICDA/SASH3/BST2/SWAP70/CD180/VAV3/IL10/TLR4/TNFRSF21/DCLRE1C/HHEX/BANK1/SAMSN1/MS4A1/MMP14/TNFRSF13C/ICOSLG/CXCR5/FCRL3/IKZF3/FCRL1/MNDA/SYK/PRKCB/INPP5D/MZB1/CLCF1/GAPT/C17orf99/PLCG2/NTRK1/IGKC/IGLC2/IGLC3/IGLC7/TRDC/IGHA2/IGHE/IGHG4/IGHA1/IGHG1/IGHD/IGHM/IGHV1-3/IGHV2-5/IGHV3-11/IGHV3-15/IGHV1-18/…	83
GO:0002377	immunoglobulin production	60/1875	180/18493	1.69373e-17	3.68542e-15	3.20719e-15	BTK/POU2F2/POLQ/FCGR2B/MLH1/CD40/NBN/AICDA/SASH3/PMS2P5/SWAP70/IL10/FCRL3/MZB1/CLCF1/GAPT/C17orf99/IGKC/IGKV4-1/IGKV5-2/IGKV3D-11/IGLV4-69/IGLV8-61/IGLV4-60/IGLV10-54/IGLV1-51/IGLV1-47/IGLV1-44/IGLV7-43/IGLV1-40/IGLV5-37/IGLV3-27/IGLV2-23/IGLV3-19/IGLV3-16/IGLV2-14/IGLV2-11/IGLV3-10/IGLV3-1/IGKV6D-21/IGKV2D-30/IGKV1D-8/IGKV1-6/IGKV3-20/IGKV1D-33/IGKV1-17/IGKV1-8/IGKV1-16/IGKV1-9/IGKV1-39/IGKV2D-2…	60
GO:0002696	positive regulation of leukocyte activation	94/1875	372/18493	2.5844e-17	5.42263e-15	4.71896e-15	BTK/CD74/STAP1/MLH1/MEF2C/CD40/PYCARD/RIPK2/IL7/LILRB1/DOCK8/MAP3K8/ZMIZ1/CCL2/PTPN6/CD83/CD86/NR4A3/CD80/CCR2/SASH3/TNFSF9/NECTIN2/LILRB2/FLOT2/AP3B1/VAV3/RAC1/IL10/TLR4/THBS1/MMP14/TNFRSF13C/ICOSLG/ZBTB7B/FCRL3/NLRP3/SPTA1/IL15/SYK/AP1G1/AXL/INPP5D/LGALS9/PTAFR/ITGAM/TLR6/CLCF1/GRB2/GATA2/GAS6/CLECL1/LILRB4/LRRK2/PDCD1LG2/CRLF2/IGKC/IGLC2/IGLC3/IGLC7/TRDC/IGHA2/IGHE/IGHG4/IGHA1/IGHG1/IGHD/IGHM/…	94
GO:0006959	humoral immune response	90/1875	349/18493	3.14045e-17	6.36211e-15	5.53653e-15	POU2F2/FCGR2B/MEF2C/BLNK/ACOD1/IL7/C5/CCL2/PTPN6/CD83/LY86/CCR2/CXCL6/BST2/JCHAIN/TNFRSF21/SERPING1/CXCL13/MS4A1/S100A9/S100A12/CXCL3/CXCL5/CXCL1/RNASE6/C3AR1/A2M/CD19/CCL13/PAX5/IGKC/IGKV4-1/IGKV5-2/IGKV3D-11/IGLV1-51/IGLV1-47/IGLV1-44/IGLV7-43/IGLV1-40/IGLV3-27/IGLV2-23/IGLV3-19/IGLV2-14/IGLV2-11/IGLV3-1/IGLC2/IGLC3/IGLC7/TRDC/IGHA2/IGHE/IGHG4/IGHA1/IGHG1/IGHD/IGHM/IGHV1-3/IGHV2-5/IGHV3-11/IGHV…	90
GO:0050900	leukocyte migration	109/1875	478/18493	2.14439e-16	3.93696e-14	3.42608e-14	CD74/STAP1/KITLG/CD84/B4GALT1/ICAM1/PDGFB/MMP9/HCK/PYCARD/C5/DOCK8/CCL7/CCL2/CCL8/PTPN6/PADI2/CCR2/CXCL6/FFAR2/RIPK3/MOSPD2/TRPM4/JCHAIN/SWAP70/VAV3/RAC1/IL10/THBS1/ECM1/LYST/PTPRO/MCOLN2/SLC7A7/CXCL13/MMP14/F11R/ABR/CXCR5/CCR5/SDC3/S100A9/S100A12/CXCL3/CXCL5/CXCL1/SYK/INPP5D/LGALS9/GCSAML/PTAFR/ITGAM/CEACAM3/C3AR1/CMKLR1/GRB2/FUT7/CCL13/PLCB1/GAS6/CXCR3/GCNT1/CNR2/L1CAM/IGKC/IGKV4-1/IGKV5-2/IGKV…	109
GO:0034341	response to interferon-gamma	59/1875	198/18493	1.01552e-14	1.45517e-12	1.26634e-12	NUB1/NR1H3/SP100/OAS1/KIF16B/ICAM1/JAK2/CD40/HCK/ACOD1/CCL7/CCL2/CCL8/CYP27B1/OAS3/OAS2/TRIM38/TRIM25/MT2A/IRF5/BST2/TRIM5/TRIM22/OASL/TLR4/TLR2/CASP1/ACTR2/PARP9/PML/IRF8/IFITM3/GSN/NCAM1/FCGR1A/TRIM68/LGALS9/PTAFR/STX8/PARP14/CIITA/CCL13/ACTG1/IFITM2/IRF7/HLA-DRB1/DAPK1/HLA-DQA1/MYO1C/FCGR1B/HLA-DRA/HLA-DPB1/HLA-DPA1/TRIM26/HLA-B/HLA-DQA2/CCL5/CCL18/RAB7B	59
GO:0042119	neutrophil activation	99/1875	498/18493	3.36147e-11	3.65716e-09	3.18259e-09	FUCA2/ENPP4/ALOX5/CAPN1/ACPP/SERPINB1/DERA/GDI2/RAB27A/FCGR2B/CPNE3/B4GALT1/DYNLL1/CMTM6/SNAP29/MMP9/CTSZ/COTL1/CPPED1/PYCARD/CTSH/ATP8B4/P2RX1/CTSC/COMMD9/PTPN6/FAF2/ARSB/PSMD14/GCA/PADI2/PRDX6/HVCN1/TNFAIP6/SERPINB6/CXCL6/FGL2/MOSPD2/BST2/LILRB2/CAP1/CHI3L1/OSTF1/GNS/RAC1/PSMB7/TLR2/ACTR2/DNAJC13/IDH1/SLC15A4/CREG1/DOK3/FRMPD3/STOM/GSN/DSN1/NDUFC2/LPCAT1/PTPRN2/ABR/PSMC2/AGL/ARPC5/NCSTN/CTSS/S1…	99
GO:0002283	neutrophil activation involved in immune response	96/1875	488/18493	1.22422e-10	1.21904e-08	1.06085e-08	FUCA2/ENPP4/ALOX5/CAPN1/ACPP/SERPINB1/DERA/GDI2/RAB27A/CPNE3/B4GALT1/DYNLL1/CMTM6/SNAP29/MMP9/CTSZ/COTL1/CPPED1/PYCARD/CTSH/ATP8B4/P2RX1/CTSC/COMMD9/PTPN6/FAF2/ARSB/PSMD14/GCA/PADI2/PRDX6/HVCN1/TNFAIP6/SERPINB6/FGL2/MOSPD2/BST2/LILRB2/CAP1/CHI3L1/OSTF1/GNS/RAC1/PSMB7/TLR2/ACTR2/DNAJC13/IDH1/SLC15A4/CREG1/DOK3/FRMPD3/STOM/GSN/DSN1/NDUFC2/LPCAT1/PTPRN2/ABR/PSMC2/AGL/ARPC5/NCSTN/CTSS/S100A11/S100A9/…	96
GO:0043312	neutrophil degranulation	95/1875	485/18493	1.95113e-10	1.87916e-08	1.63531e-08	FUCA2/ENPP4/ALOX5/CAPN1/ACPP/SERPINB1/DERA/GDI2/RAB27A/CPNE3/B4GALT1/DYNLL1/CMTM6/SNAP29/MMP9/CTSZ/COTL1/CPPED1/PYCARD/CTSH/ATP8B4/P2RX1/CTSC/COMMD9/PTPN6/FAF2/ARSB/PSMD14/GCA/PADI2/PRDX6/HVCN1/TNFAIP6/SERPINB6/FGL2/MOSPD2/BST2/LILRB2/CAP1/CHI3L1/OSTF1/GNS/RAC1/PSMB7/TLR2/ACTR2/DNAJC13/IDH1/SLC15A4/CREG1/DOK3/FRMPD3/STOM/GSN/DSN1/NDUFC2/LPCAT1/PTPRN2/ABR/PSMC2/AGL/ARPC5/NCSTN/CTSS/S100A11/S100A9/…	95
GO:0002446	neutrophil mediated immunity	96/1875	499/18493	4.29299e-10	3.94083e-08	3.42945e-08	FUCA2/ENPP4/ALOX5/CAPN1/ACPP/SERPINB1/DERA/GDI2/RAB27A/CPNE3/B4GALT1/DYNLL1/CMTM6/SNAP29/MMP9/CTSZ/COTL1/CPPED1/PYCARD/CTSH/ATP8B4/P2RX1/CTSC/COMMD9/PTPN6/FAF2/ARSB/PSMD14/GCA/PADI2/PRDX6/HVCN1/TNFAIP6/SERPINB6/CXCL6/FGL2/MOSPD2/BST2/LILRB2/CAP1/CHI3L1/OSTF1/GNS/RAC1/PSMB7/TLR2/ACTR2/DNAJC13/IDH1/SLC15A4/CREG1/DOK3/FRMPD3/STOM/GSN/DSN1/NDUFC2/LPCAT1/PTPRN2/ABR/PSMC2/AGL/ARPC5/NCSTN/CTSS/S100A11/S…	96
GO:0019882	antigen processing and presentation	44/1875	175/18493	9.15171e-09	7.6809e-07	6.68419e-07	HFE/CD74/RAB27A/FCGR2B/DYNLL1/LAG3/ICAM1/AP1B1/KIF3B/PYCARD/CTSH/AP1S1/RAB34/CAPZA1/LILRB2/AP3B1/THBS1/KIF11/CLTC/MARCH1/FCGR1A/AP1S3/KIF5A/CD1C/CTSS/ERAP2/AP1G1/DCTN5/RILP/TAP1/HLA-DRB1/HLA-DQA1/FCGR1B/HLA-DOA/HLA-DMA/PSMB8/TAP2/HLA-DRA/HLA-DPB1/HLA-DPA1/HLA-B/HLA-DQA2/HLA-DOB/HLA-DMB	44
GO:0032479	regulation of type I interferon production	32/1875	113/18493	4.79912e-08	3.75931e-06	3.27149e-06	TLR8/ACOD1/PYCARD/RIPK2/LILRB1/DDX58/DHX58/DTX4/TRIM38/POLR3G/IFIH1/TRIM25/ZBP1/IRF5/IL10/TLR4/TLR2/HERC5/UBE2L6/REL/IFI16/CGAS/SYK/CD14/MYD88/UBA7/NPLOC4/TBK1/IRF7/ISG15/TLR7/PLCG2	32
GO:0045088	regulation of innate immune response	71/1875	365/18493	5.14844e-08	3.97988e-06	3.46343e-06	BTK/HFE/NR1H3/FCGR2B/WDFY1/LAG3/MUL1/NLRC4/JAK2/COCH/HCK/TLR8/ACOD1/PYCARD/RIPK2/LILRB1/DDX58/DHX58/UNC93B1/PTPN6/POLR3G/IFIH1/ZBP1/EREG/FFAR2/NECTIN2/TRIM5/RSAD2/TRAFD1/RNASEL/DAB2IP/TLR4/CNPY3/TLR2/DDX60/PARP9/SERPING1/PIK3AP1/S100A1/FCRL3/SLAMF6/CTSS/S100A9/IFI16/AIM2/CGAS/SYK/AP1G1/LGALS9/ITGAM/CD14/PRKCE/MUCL1/MYD88/PARP14/TLR10/TLR1/TLR6/A2M/NPLOC4/TBK1/USP18/IRF7/PLSCR1/TLR7/PLCG2/NRAS/LIL…	71
GO:0032606	type I interferon production	32/1875	114/18493	6.03011e-08	4.54191e-06	3.95253e-06	TLR8/ACOD1/PYCARD/RIPK2/LILRB1/DDX58/DHX58/DTX4/TRIM38/POLR3G/IFIH1/TRIM25/ZBP1/IRF5/IL10/TLR4/TLR2/HERC5/UBE2L6/REL/IFI16/CGAS/SYK/CD14/MYD88/UBA7/NPLOC4/TBK1/IRF7/ISG15/TLR7/PLCG2	32
GO:0050688	regulation of defense response to virus	22/1875	68/18493	4.78459e-07	3.12328e-05	2.71799e-05	ZMPSTE24/MUL1/PYCARD/LILRB1/DDX58/DHX58/TRIM38/APOBEC3F/EIF2AK4/DDX60/PARP9/HERC5/AIM2/DTX3L/IL15/CGAS/ELMOD2/NPLOC4/IFNLR1/IFIT1/IL27/APOBEC3G	22
GO:0050663	cytokine secretion	44/1875	210/18493	2.31016e-06	0.000137093	0.000119303	HYAL2/FCGR2B/PANX2/NLRC4/ABL1/TLR8/PYCARD/RIPK2/LILRB1/C5/DDX58/PANX1/IFIH1/FFAR2/SYT11/CHI3L1/IL10/TLR4/TLR2/CASP1/PML/TNFRSF21/BANK1/MCOLN2/ZBTB7B/NLRP3/S100A12/AIM2/SYK/ABCA1/LGALS9/CD14/TLR10/TLR1/TLR6/GAS6/CLECL1/LRRK2/ANXA4/MBP/SCAMP5/CRLF2/IGHD/LYN	44
GO:0002683	negative regulation of immune system process	73/1875	437/18493	1.27331e-05	0.000650493	0.000566082	TMEM176A/BTK/HFE/CD74/NR1H3/STAP1/KITLG/CD84/FCGR2B/LAG3/MUL1/ACOD1/LILRB1/TMEM176B/C5/PPP3CB/CCL2/DHX58/PRKAR1A/LPXN/PTPN6/TRIM38/CD86/PADI2/GPR68/CD80/CCR2/BST2/LILRB2/IDO1/DTX1/TRAFD1/IL10/DAB2IP/TLR4/THBS1/TNFRSF21/SERPING1/BANK1/SAMSN1/HIST1H4H/ABR/ZBTB7B/FCRL3/MNDA/IFI16/GPER1/AXL/INPP5D/LGALS9/CD14/SOCS6/PARP14/TLR6/A2M/GATA2/NPLOC4/PLCB1/IFIT1/LILRB4/CNR2/NF1/PDCD1LG2/MAFB/HLA-DOA/NME1/LI…	73
GO:0050707	regulation of cytokine secretion	37/1875	184/18493	3.6887e-05	0.00162941	0.00141797	HYAL2/FCGR2B/PANX2/ABL1/TLR8/PYCARD/RIPK2/LILRB1/C5/DDX58/PANX1/IFIH1/FFAR2/SYT11/IL10/TLR4/TLR2/CASP1/PML/TNFRSF21/BANK1/NLRP3/AIM2/SYK/LGALS9/CD14/TLR10/TLR1/TLR6/GAS6/LRRK2/ANXA4/MBP/SCAMP5/CRLF2/IGHD/LYN	37
GO:1902105	regulation of leukocyte differentiation	47/1875	265/18493	0.000100723	0.00365278	0.00317878	TMEM176A/BTK/CD74/KITLG/PRDM1/FCGR2B/TESC/ABL1/RASSF2/RIPK2/IL7/LILRB1/TMEM176B/ZMIZ1/PTPN6/CD83/CD86/GPR68/CD80/SASH3/TNFSF9/LILRB2/AP3B1/DTX1/TLR4/RB1/MMP14/ZBTB7B/FCRL3/IKZF3/NLRP3/IL15/SYK/AXL/INPP5D/LGALS9/GATA2/GAS6/IRF7/LILRB4/FANCA/NF1/IL27/MAFB/HLA-DOA/NME1/LYN	47
GO:0002577	regulation of antigen processing and presentation	8/1875	17/18493	0.000115378	0.00408339	0.00355351	HFE/CD74/FCGR2B/PYCARD/LILRB2/THBS1/HLA-DOA/HLA-DOB	8
GO:0042108	positive regulation of cytokine biosynthetic process	16/1875	57/18493	0.000119103	0.00416506	0.00362458	TLR8/CD86/CD80/CCR2/EREG/TLR4/THBS1/TNFRSF13C/SYK/CYBB/PTAFR/TLR1/TLR6/TBK1/TLR7/IL27	16
GO:0045621	positive regulation of lymphocyte differentiation	22/1875	94/18493	0.000141603	0.00467369	0.00406721	BTK/CD74/RIPK2/IL7/ZMIZ1/CD83/CD86/CD80/SASH3/TNFSF9/LILRB2/AP3B1/MMP14/ZBTB7B/NLRP3/IL15/SYK/AXL/INPP5D/LGALS9/GAS6/LILRB4	22
GO:0030098	lymphocyte differentiation	56/1875	344/18493	0.000248415	0.0071541	0.00622575	CD79B/BTK/CD74/POU2F2/BAK1/HDAC9/PRDM1/SPI1/FCGR2B/BLNK/ABL1/RIPK2/IL7/LYL1/CD79A/PPP3CB/ZMIZ1/PTPN6/AICDA/CD83/CD86/CD80/SASH3/RUNX2/TNFSF9/RIPK3/LILRB2/AP3B1/RSAD2/DTX1/IL10/DCLRE1C/HHEX/MMP14/ZBTB7B/FCRL3/IKZF3/NLRP3/SLAMF6/IL15/SYK/AXL/INPP5D/LGALS9/CLCF1/FUT7/GAS6/LILRB4/FANCA/C17orf99/SEMA4A/IL27/PLCG2/NTRK1/MAFB/HLA-DOA	56
GO:0042089	cytokine biosynthetic process	23/1875	105/18493	0.000288214	0.00798707	0.00695063	MAP2K3/LAG3/TLR8/LILRB1/CD86/CD80/CCR2/EREG/IL10/TLR4/THBS1/TNFRSF13C/SYK/CYBB/INPP5D/PTAFR/TLR1/TLR6/TBK1/IRF7/TLR7/IL27/UBE2J1	23
M.tb-infected vs M.tb-infected (CMV-infected infants) Downregulated gene sets
ID	Description	GeneRatio	BgRatio	pvalue	p.adjust	qvalue	geneID	Count
GO:0033077	T cell differentiation in thymus	16/1436	69/18493	5.95022e-05	0.00650031	0.00637587	GATA3/ZAP70/TMEM131L/CCR7/FOXJ1/TESPA1/RPS6/ITPKB/ZC3H8/ZEB1/CAMK4/ZFP36L2/CD3D/RASGRP1/STAT5B/CD28	16
M.tb-infected vs M.tb-uninfected (CMV-uninfected infants) Upregulated gene sets
ID	Description	GeneRatio	BgRatio	pvalue	p.adjust	qvalue	geneID	Count
GO:0002455	humoral immune response mediated by circulating immunoglobulin	58/1708	149/18493	1.11305e-22	3.5323e-20	3.36947e-20	MASP2/FCGR2B/C1QBP/CR2/C4BPB/ZP3/IGKC/IGKV4-1/IGLV1-51/IGLV1-47/IGLV1-44/IGLV2-23/IGLV3-21/IGLV2-14/IGLV2-11/IGLC2/IGLC3/IGLC7/IGHA2/IGHA1/IGHD/IGHM/IGHV6-1/IGHV1-3/IGHV2-5/IGHV3-7/IGHV3-11/IGHV3-13/IGHV3-15/IGHV1-18/IGHV3-20/IGHV3-21/IGHV3-23/IGHV3-33/IGHV4-34/IGHV4-39/IGHV3-48/IGHV3-49/IGHV5-51/IGHV1-58/IGHV4-61/IGHV3-66/IGHV1-69/IGHV3-73/IGLC6/IGHV4-59/LTA/IGHV3-43/IGKV3-20/IGKV1-17/IGKV2-30/I…	58
GO:0006958	complement activation, classical pathway	55/1708	137/18493	2.44877e-22	7.33952e-20	7.0012e-20	MASP2/C1QBP/CR2/C4BPB/IGKC/IGKV4-1/IGLV1-51/IGLV1-47/IGLV1-44/IGLV2-23/IGLV3-21/IGLV2-14/IGLV2-11/IGLC2/IGLC3/IGLC7/IGHA2/IGHA1/IGHD/IGHM/IGHV6-1/IGHV1-3/IGHV2-5/IGHV3-7/IGHV3-11/IGHV3-13/IGHV3-15/IGHV1-18/IGHV3-20/IGHV3-21/IGHV3-23/IGHV3-33/IGHV4-34/IGHV4-39/IGHV3-48/IGHV3-49/IGHV5-51/IGHV1-58/IGHV4-61/IGHV3-66/IGHV1-69/IGHV3-73/IGLC6/IGHV4-59/IGHV3-43/IGKV3-20/IGKV1-17/IGKV2-30/IGKV1-5/IGKV2-28…	55
GO:0016064	immunoglobulin mediated immune response	68/1708	212/18493	7.96481e-21	2.14851e-18	2.04947e-18	MASP2/CD74/POU2F2/FOXP3/FCGR2B/MSH2/C1QBP/CCR6/MSH6/CR2/TNFSF4/C4BPB/XCL1/HSPD1/ZP3/IGKC/IGKV4-1/IGLV1-51/IGLV1-47/IGLV1-44/IGLV2-23/IGLV3-21/IGLV2-14/IGLV2-11/IGLC2/IGLC3/IGLC7/IGHA2/IGHA1/IGHD/IGHM/IGHV6-1/IGHV1-3/IGHV2-5/IGHV3-7/IGHV3-11/IGHV3-13/IGHV3-15/IGHV1-18/IGHV3-20/IGHV3-21/IGHV3-23/IGHV3-33/IGHV4-34/IGHV4-39/IGHV3-48/IGHV3-49/IGHV5-51/IGHV1-58/IGHV4-61/IGHV3-66/IGHV1-69/IGHV3-73/IGLC6…	68
GO:0019724	B cell mediated immunity	68/1708	213/18493	1.06695e-20	2.74105e-18	2.6147e-18	MASP2/CD74/POU2F2/FOXP3/FCGR2B/MSH2/C1QBP/CCR6/MSH6/CR2/TNFSF4/C4BPB/XCL1/HSPD1/ZP3/IGKC/IGKV4-1/IGLV1-51/IGLV1-47/IGLV1-44/IGLV2-23/IGLV3-21/IGLV2-14/IGLV2-11/IGLC2/IGLC3/IGLC7/IGHA2/IGHA1/IGHD/IGHM/IGHV6-1/IGHV1-3/IGHV2-5/IGHV3-7/IGHV3-11/IGHV3-13/IGHV3-15/IGHV1-18/IGHV3-20/IGHV3-21/IGHV3-23/IGHV3-33/IGHV4-34/IGHV4-39/IGHV3-48/IGHV3-49/IGHV5-51/IGHV1-58/IGHV4-61/IGHV3-66/IGHV1-69/IGHV3-73/IGLC6…	68
GO:0006956	complement activation	57/1708	170/18493	1.09028e-18	2.35283e-16	2.24438e-16	MASP2/C1QBP/CR2/C4BPB/PHB/CD19/IGKC/IGKV4-1/IGLV1-51/IGLV1-47/IGLV1-44/IGLV2-23/IGLV3-21/IGLV2-14/IGLV2-11/IGLC2/IGLC3/IGLC7/IGHA2/IGHA1/IGHD/IGHM/IGHV6-1/IGHV1-3/IGHV2-5/IGHV3-7/IGHV3-11/IGHV3-13/IGHV3-15/IGHV1-18/IGHV3-20/IGHV3-21/IGHV3-23/IGHV3-33/IGHV4-34/IGHV4-39/IGHV3-48/IGHV3-49/IGHV5-51/IGHV1-58/IGHV4-61/IGHV3-66/IGHV1-69/IGHV3-73/IGLC6/IGHV4-59/IGHV3-43/IGKV3-20/IGKV1-17/IGKV2-30/IGKV1-5…	57
GO:0050853	B cell receptor signaling pathway	44/1708	122/18493	4.45972e-16	7.5188e-14	7.17222e-14	CD79B/CD22/STAP1/MEF2C/CD79A/BLK/CD19/PAX5/IGKC/IGLC2/IGLC3/IGLC7/IGHA2/IGHA1/IGHD/IGHM/IGHV6-1/IGHV1-3/IGHV2-5/IGHV3-7/IGHV3-11/IGHV3-13/IGHV3-15/IGHV1-18/IGHV3-20/IGHV3-21/IGHV3-23/IGHV3-33/IGHV4-34/IGHV4-39/IGHV3-48/IGHV3-49/IGHV5-51/IGHV1-58/IGHV4-61/IGHV3-66/IGHV1-69/IGHV3-73/IGLC6/IGHV4-59/IGHV3-43/IGLL5/IGHV3-64D/IGHV5-10-1	44
GO:0002460	adaptive immune response based on somatic recombination of immune receptors built from immunoglobulin superfamily domains	83/1708	354/18493	9.27592e-16	1.51647e-13	1.44657e-13	MASP2/CD74/POU2F2/FOXP3/PRKCZ/FCGR2B/CEACAM1/MEF2C/MSH2/TSTA3/C1QBP/CCR6/IL18R1/MSH6/CR2/TNFSF4/C4BPB/IRF4/XCL1/HSPD1/CXCL13/CD1D/CD1C/TNFRSF13C/IL12A/CCL19/ZP3/HMGB1/AGER/IGKC/IGKV4-1/IGLV1-51/IGLV1-47/IGLV1-44/IGLV2-23/IGLV3-21/IGLV2-14/IGLV2-11/IGLC2/IGLC3/IGLC7/IGHA2/IGHA1/IGHD/IGHM/IGHV6-1/IGHV1-3/IGHV2-5/IGHV3-7/IGHV3-11/IGHV3-13/IGHV3-15/IGHV1-18/IGHV3-20/IGHV3-21/IGHV3-23/IGHV3-33/IGHV4-3…	83
GO:0002449	lymphocyte mediated immunity	81/1708	344/18493	1.60148e-15	2.46856e-13	2.35477e-13	MASP2/CD74/POU2F2/FOXP3/PRKCZ/FCGR2B/CEACAM1/MSH2/TSTA3/C1QBP/CCR6/IL18R1/MSH6/CR2/TNFSF4/C4BPB/XCL1/HSPD1/CD96/CD1D/CD1C/IL12A/ZP3/HMGB1/AGER/NCR3/SERPINB4/IGKC/IGKV4-1/IGLV1-51/IGLV1-47/IGLV1-44/IGLV2-23/IGLV3-21/IGLV2-14/IGLV2-11/IGLC2/IGLC3/IGLC7/IGHA2/IGHA1/IGHD/IGHM/IGHV6-1/IGHV1-3/IGHV2-5/IGHV3-7/IGHV3-11/IGHV3-13/IGHV3-15/IGHV1-18/IGHV3-20/IGHV3-21/IGHV3-23/IGHV3-33/IGHV4-34/IGHV4-39/IGHV…	81
GO:0050864	regulation of B cell activation	54/1708	183/18493	4.51419e-15	6.76502e-13	6.45318e-13	CD22/CD74/FOXP3/FCGR2B/MEF2C/CYLD/MSH2/IL7/MSH6/TNFSF4/BANK1/TNFRSF13C/CD320/MZB1/PAWR/IGKC/IGLC2/IGLC3/IGLC7/IGHA2/IGHA1/IGHD/IGHM/IGHV6-1/IGHV1-3/IGHV2-5/IGHV3-7/IGHV3-11/IGHV3-13/IGHV3-15/IGHV1-18/IGHV3-20/IGHV3-21/IGHV3-23/IGHV3-33/IGHV4-34/IGHV4-39/IGHV3-48/IGHV3-49/IGHV5-51/IGHV1-58/IGHV4-61/IGHV3-66/IGHV1-69/IGHV3-73/MIR17HG/IGLC6/EXOSC6/IGHV4-59/IGHV3-43/TNFRSF13B/IGLL5/IGHV3-64D/IGHV5-10…	54
GO:0042113	B cell activation	72/1708	303/18493	3.71627e-14	5.41873e-12	5.16895e-12	CD79B/CD22/CD74/POU2F2/HDAC9/FOXP3/TCF3/FCGR2B/TPD52/ITM2A/MEF2C/CYLD/MSH2/BLNK/MFNG/IL7/CD79A/ITFG2/CCR6/MSH6/CR2/TNFSF4/HSPD1/DCAF1/BANK1/MS4A1/TNFRSF13C/CXCR5/FCRL1/CD320/MZB1/CTPS1/PAWR/IGKC/IGLC2/IGLC3/IGLC7/IGHA2/IGHA1/IGHD/IGHM/IGHV6-1/IGHV1-3/IGHV2-5/IGHV3-7/IGHV3-11/IGHV3-13/IGHV3-15/IGHV1-18/IGHV3-20/IGHV3-21/IGHV3-23/IGHV3-33/IGHV4-34/IGHV4-39/IGHV3-48/IGHV3-49/IGHV5-51/IGHV1-58/IGHV4-…	72
GO:0050871	positive regulation of B cell activation	45/1708	144/18493	8.77348e-14	1.21366e-11	1.15772e-11	CD74/MEF2C/MSH2/IL7/MSH6/TNFSF4/TNFRSF13C/CD320/IGKC/IGLC2/IGLC3/IGLC7/IGHA2/IGHA1/IGHD/IGHM/IGHV6-1/IGHV1-3/IGHV2-5/IGHV3-7/IGHV3-11/IGHV3-13/IGHV3-15/IGHV1-18/IGHV3-20/IGHV3-21/IGHV3-23/IGHV3-33/IGHV4-34/IGHV4-39/IGHV3-48/IGHV3-49/IGHV5-51/IGHV1-58/IGHV4-61/IGHV3-66/IGHV1-69/IGHV3-73/IGLC6/EXOSC6/IGHV4-59/IGHV3-43/IGLL5/IGHV3-64D/IGHV5-10-1	45
GO:0006959	humoral immune response	77/1708	349/18493	3.1035e-13	4.08375e-11	3.8955e-11	MASP2/POU2F2/FCGR2B/ST6GAL1/MEF2C/BLNK/IL7/RPS19/C1QBP/PF4V1/POU2AF1/CCR6/CR2/C4BPB/CCR7/JCHAIN/LCN2/CXCL13/RPL30/MS4A1/PHB/CD19/ZP3/PAX5/RPL39/IGKC/IGKV4-1/IGLV1-51/IGLV1-47/IGLV1-44/IGLV2-23/IGLV3-21/IGLV2-14/IGLV2-11/IGLC2/IGLC3/IGLC7/IGHA2/IGHA1/IGHD/IGHM/IGHV6-1/IGHV1-3/IGHV2-5/IGHV3-7/IGHV3-11/IGHV3-13/IGHV3-15/IGHV1-18/IGHV3-20/IGHV3-21/IGHV3-23/IGHV3-33/IGHV4-34/IGHV4-39/IGHV3-48/IGHV3-49…	77
GO:0002920	regulation of humoral immune response	39/1708	126/18493	5.468e-12	6.70451e-10	6.39546e-10	FCGR2B/C1QBP/CR2/C4BPB/CCR7/CXCL13/PHB/CD19/ZP3/IGKC/IGKV4-1/IGLV1-51/IGLV1-47/IGLV1-44/IGLV2-23/IGLV3-21/IGLV2-14/IGLV2-11/IGLC7/IGHV2-5/IGHV3-7/IGHV3-11/IGHV3-13/IGHV3-23/IGHV3-33/IGHV4-34/IGHV4-39/IGHV3-48/IGHV1-69/IGLC6/IGHV4-59/LTA/IGKV3-20/IGKV1-17/IGKV2-30/IGKV1-5/IGKV2-28/IGKV3-15/IGLV2-8	39
GO:0002429	immune response-activating cell surface receptor signaling pathway	82/1708	414/18493	2.1139e-11	2.53433e-09	2.41751e-09	CD79B/CD22/STAP1/FOXP3/PHPT1/EIF2B3/FCGR2B/CEACAM1/MEF2C/CYLD/HSP90AB1/RPS6KA5/CD79A/EIF2B1/GPLD1/CR2/RBCK1/CCR7/BLK/RPS3/VAV2/STOML2/CACNB3/PRKCE/PAWR/CD19/UBE2N/PAX5/NCR3/IGKC/IGKV4-1/IGLV1-51/IGLV1-47/IGLV1-44/IGLV2-23/IGLV3-21/IGLV2-14/IGLV2-11/IGLC2/IGLC3/IGLC7/IGHA2/IGHA1/IGHD/IGHM/IGHV6-1/IGHV1-3/IGHV2-5/IGHV3-7/IGHV3-11/IGHV3-13/IGHV3-15/IGHV1-18/IGHV3-20/IGHV3-21/IGHV3-23/IGHV3-33/IGHV4-…	82
GO:0050851	antigen receptor-mediated signaling pathway	59/1708	259/18493	4.77905e-11	5.60499e-09	5.34663e-09	CD79B/CD22/STAP1/FOXP3/PHPT1/EIF2B3/CEACAM1/MEF2C/CYLD/CD79A/EIF2B1/RBCK1/CCR7/BLK/RPS3/STOML2/CACNB3/PAWR/CD19/UBE2N/PAX5/IGKC/IGLC2/IGLC3/IGLC7/IGHA2/IGHA1/IGHD/IGHM/IGHV6-1/IGHV1-3/IGHV2-5/IGHV3-7/IGHV3-11/IGHV3-13/IGHV3-15/IGHV1-18/IGHV3-20/IGHV3-21/IGHV3-23/IGHV3-33/IGHV4-34/IGHV4-39/IGHV3-48/IGHV3-49/IGHV5-51/IGHV1-58/IGHV4-61/IGHV3-66/IGHV1-69/IGHV3-73/LAT/IGLC6/IGHV4-59/HLA-DPA1/IGHV3-43/…	59
GO:0030449	regulation of complement activation	34/1708	107/18493	5.55343e-11	6.37463e-09	6.08079e-09	C1QBP/CR2/C4BPB/PHB/CD19/IGKC/IGKV4-1/IGLV1-51/IGLV1-47/IGLV1-44/IGLV2-23/IGLV3-21/IGLV2-14/IGLV2-11/IGLC7/IGHV2-5/IGHV3-7/IGHV3-11/IGHV3-13/IGHV3-23/IGHV3-33/IGHV4-34/IGHV4-39/IGHV3-48/IGHV1-69/IGLC6/IGHV4-59/IGKV3-20/IGKV1-17/IGKV2-30/IGKV1-5/IGKV2-28/IGKV3-15/IGLV2-8	34
GO:0002768	immune response-regulating cell surface receptor signaling pathway	85/1708	445/18493	6.42383e-11	7.07277e-09	6.74675e-09	CD79B/CD22/STAP1/FOXP3/PHPT1/EIF2B3/FCGR2B/CEACAM1/MEF2C/CYLD/HSP90AB1/RPS6KA5/CD79A/EIF2B1/GPLD1/CR2/RBCK1/CCR7/BLK/RPS3/VAV2/CD200R1/STOML2/CACNB3/PRKCE/PAWR/CD19/UBE2N/PAX5/NCR3/IGKC/IGKV4-1/IGLV1-51/IGLV1-47/IGLV1-44/IGLV2-23/IGLV3-21/IGLV2-14/IGLV2-11/IGLC2/IGLC3/IGLC7/IGHA2/IGHA1/IGHD/IGHM/IGHV6-1/IGHV1-3/IGHV2-5/IGHV3-7/IGHV3-11/IGHV3-13/IGHV3-15/IGHV1-18/IGHV3-20/IGHV3-21/IGHV3-23/IGHV3-3…	85
GO:0051251	positive regulation of lymphocyte activation	67/1708	333/18493	7.36096e-10	7.637e-08	7.28497e-08	CD74/FOXP3/PRKCZ/MEF2C/CYLD/MSH2/DNAJA3/IL7/MSH6/TNFSF4/CCR7/XCL1/HSPD1/RPS3/CD1D/TNFRSF13C/ICOS/CD320/IL12A/CCL19/EGR3/SOCS1/ZP3/HMGB1/BLM/DPP4/AGER/IGKC/IGLC2/IGLC3/IGLC7/IGHA2/IGHA1/IGHD/IGHM/IGHV6-1/IGHV1-3/IGHV2-5/IGHV3-7/IGHV3-11/IGHV3-13/IGHV3-15/IGHV1-18/IGHV3-20/IGHV3-21/IGHV3-23/IGHV3-33/IGHV4-34/IGHV4-39/IGHV3-48/IGHV3-49/IGHV5-51/IGHV1-58/IGHV4-61/IGHV3-66/IGHV1-69/IGHV3-73/IGLC6/EXOS…	67
GO:0051249	regulation of lymphocyte activation	85/1708	472/18493	1.34165e-09	1.31604e-07	1.25538e-07	CD22/CD74/FOXP3/PRKCZ/FCGR2B/CEACAM1/MEF2C/CYLD/MSH2/DNAJA3/IL7/KAT2A/MSH6/TNFSF4/TMEM131L/CCR7/DTX1/IRF4/XCL1/ZC3H8/HSPD1/FANCD2/RPS3/BANK1/CD1D/TNFRSF13C/ICOS/METTL3/CD320/IL12A/MZB1/CCL19/PAWR/EGR3/SOCS1/ZP3/HMGB1/BLM/DPP4/NRARP/HLA-DOA/AGER/IGKC/IGLC2/IGLC3/IGLC7/IGHA2/IGHA1/IGHD/IGHM/IGHV6-1/IGHV1-3/IGHV2-5/IGHV3-7/IGHV3-11/IGHV3-13/IGHV3-15/IGHV1-18/IGHV3-20/IGHV3-21/IGHV3-23/IGHV3-33/IGHV4…	85
GO:0002696	positive regulation of leukocyte activation	71/1708	372/18493	2.51724e-09	2.34147e-07	2.23354e-07	CD74/STAP1/FOXP3/KARS/PRKCZ/MEF2C/CYLD/MSH2/DNAJA3/IL7/MSH6/TNFSF4/CCR7/XCL1/HSPD1/RPS3/CD1D/TNFRSF13C/ICOS/F2RL1/CD320/IL12A/CCL19/EGR3/SOCS1/ZP3/HMGB1/BLM/DPP4/AGER/CRLF2/IGKC/IGLC2/IGLC3/IGLC7/IGHA2/IGHA1/IGHD/IGHM/IGHV6-1/IGHV1-3/IGHV2-5/IGHV3-7/IGHV3-11/IGHV3-13/IGHV3-15/IGHV1-18/IGHV3-20/IGHV3-21/IGHV3-23/IGHV3-33/IGHV4-34/IGHV4-39/IGHV3-48/IGHV3-49/IGHV5-51/IGHV1-58/IGHV4-61/IGHV3-66/IGHV1…	71
GO:0038095	Fc-epsilon receptor signaling pathway	32/1708	117/18493	1.30304e-08	1.17165e-06	1.11765e-06	VAV2/IGKC/IGKV4-1/IGLV1-51/IGLV1-47/IGLV1-44/IGLV2-23/IGLV3-21/IGLV2-14/IGLV2-11/IGLC7/IGHV2-5/IGHV3-7/IGHV3-11/IGHV3-13/IGHV3-23/IGHV3-33/IGHV4-34/IGHV4-39/IGHV3-48/IGHV1-69/LAT/IGLC6/IGHV4-59/IGKV3-20/LILRA4/IGKV1-17/IGKV2-30/IGKV1-5/IGKV2-28/IGKV3-15/IGLV2-8	32
GO:0002697	regulation of immune effector process	75/1708	439/18493	1.20247e-07	1.02973e-05	9.82265e-06	RNF216/CD22/CD74/BIRC3/FOXP3/KARS/PRKCZ/FCGR2B/CEACAM1/MSH2/RPS19/NOP53/C1QBP/IL18R1/MSH6/CR2/TNFSF4/C4BPB/IRF4/SEMA7A/XCL1/HSPD1/CD96/CD1D/CD1C/DNASE1L3/F2RL1/DDX21/TRIM44/PHB/IL12A/MZB1/CCL19/CD19/TMEM173/ZP3/HMGB1/PCBP2/AGER/NCR3/SERPINB4/IGKC/IGKV4-1/IGLV1-51/IGLV1-47/IGLV1-44/IGLV2-23/IGLV3-21/IGLV2-14/IGLV2-11/IGLC7/IGHV2-5/IGHV3-7/IGHV3-11/IGHV3-13/IGHV3-23/IGHV3-33/IGHV4-34/IGHV4-39/IGHV3…	75
GO:0002433	immune response-regulating cell surface receptor signaling pathway involved in phagocytosis	33/1708	135/18493	1.49036e-07	1.21826e-05	1.1621e-05	FCGR2B/HSP90AB1/VAV2/PRKCE/IGKC/IGKV4-1/IGLV1-51/IGLV1-47/IGLV1-44/IGLV2-23/IGLV3-21/IGLV2-14/IGLV2-11/IGLC7/IGHV2-5/IGHV3-7/IGHV3-11/IGHV3-13/IGHV3-23/IGHV3-33/IGHV4-34/IGHV4-39/IGHV3-48/IGHV1-69/IGLC6/IGHV4-59/IGKV3-20/IGKV1-17/IGKV2-30/IGKV1-5/IGKV2-28/IGKV3-15/IGLV2-8	33
GO:0038096	Fc-gamma receptor signaling pathway involved in phagocytosis	33/1708	135/18493	1.49036e-07	1.21826e-05	1.1621e-05	FCGR2B/HSP90AB1/VAV2/PRKCE/IGKC/IGKV4-1/IGLV1-51/IGLV1-47/IGLV1-44/IGLV2-23/IGLV3-21/IGLV2-14/IGLV2-11/IGLC7/IGHV2-5/IGHV3-7/IGHV3-11/IGHV3-13/IGHV3-23/IGHV3-33/IGHV4-34/IGHV4-39/IGHV3-48/IGHV1-69/IGLC6/IGHV4-59/IGKV3-20/IGKV1-17/IGKV2-30/IGKV1-5/IGKV2-28/IGKV3-15/IGLV2-8	33
GO:0038094	Fc-gamma receptor signaling pathway	33/1708	138/18493	2.58858e-07	2.02397e-05	1.93067e-05	FCGR2B/HSP90AB1/VAV2/PRKCE/IGKC/IGKV4-1/IGLV1-51/IGLV1-47/IGLV1-44/IGLV2-23/IGLV3-21/IGLV2-14/IGLV2-11/IGLC7/IGHV2-5/IGHV3-7/IGHV3-11/IGHV3-13/IGHV3-23/IGHV3-33/IGHV4-34/IGHV4-39/IGHV3-48/IGHV1-69/IGLC6/IGHV4-59/IGKV3-20/IGKV1-17/IGKV2-30/IGKV1-5/IGKV2-28/IGKV3-15/IGLV2-8	33
GO:0002431	Fc receptor mediated stimulatory signaling pathway	33/1708	140/18493	3.69825e-07	2.81015e-05	2.68062e-05	FCGR2B/HSP90AB1/VAV2/PRKCE/IGKC/IGKV4-1/IGLV1-51/IGLV1-47/IGLV1-44/IGLV2-23/IGLV3-21/IGLV2-14/IGLV2-11/IGLC7/IGHV2-5/IGHV3-7/IGHV3-11/IGHV3-13/IGHV3-23/IGHV3-33/IGHV4-34/IGHV4-39/IGHV3-48/IGHV1-69/IGLC6/IGHV4-59/IGKV3-20/IGKV1-17/IGKV2-30/IGKV1-5/IGKV2-28/IGKV3-15/IGLV2-8	33
GO:0002377	immunoglobulin production	38/1708	180/18493	9.9713e-07	7.26961e-05	6.93452e-05	CD22/POU2F2/FOXP3/TCF3/FCGR2B/PMS2P1/ITM2A/MSH2/CCR6/MSH6/TNFSF4/VPREB3/XCL1/HSPD1/MZB1/IGKC/IGKV4-1/IGKV6-21/IGLV4-60/IGLV10-54/IGLV1-51/IGLV1-47/IGLV1-44/IGLV2-23/IGLV3-21/IGLV2-14/IGLV2-11/IGLV9-49/EXOSC6/IGKV6D-21/IGKV3-20/IGKV1-17/IGKV1D-43/IGKV2-30/IGKV1-5/IGKV2-28/IGKV3-15/IGLV2-8	38
GO:0050900	leukocyte migration	73/1708	478/18493	1.22286e-05	0.000724979	0.000691561	ITGA3/CD74/STAP1/KARS/ADD2/CEACAM1/ITGA6/CD200/SLC7A5/RPS19/C1QBP/PF4V1/ADTRP/CCR6/DBH/CCR7/VPREB3/MTUS1/JCHAIN/LRCH1/ITGB7/XCL1/JAM2/SLC16A1/CXCL13/CXCR5/FCAMR/CD200R1/F2RL1/JAM3/IL12A/IL16/CCL19/VEGFB/SELP/ZP3/SELL/CNR2/HMGB1/PPIA/IGKC/IGKV4-1/IGLV1-51/IGLV1-47/IGLV1-44/IGLV2-23/IGLV3-21/IGLV2-14/IGLV2-11/IGLC7/IGHA2/IGHA1/IGHM/IGHV2-5/IGHV3-7/IGHV3-11/IGHV3-13/IGHV3-23/IGHV3-33/IGHV4-34/IGHV4-…	73
GO:0002440	production of molecular mediator of immune response	47/1708	268/18493	1.31862e-05	0.000773254	0.00073761	CD22/CD74/POU2F2/FOXP3/KARS/PRKCZ/TCF3/FCGR2B/PMS2P1/ITM2A/MSH2/CCR6/IL18R1/MSH6/TNFSF4/VPREB3/SEMA7A/XCL1/HSPD1/CD96/F2RL1/DDX21/IL12A/MZB1/IGKC/IGKV4-1/IGKV6-21/IGLV4-60/IGLV10-54/IGLV1-51/IGLV1-47/IGLV1-44/IGLV2-23/IGLV3-21/IGLV2-14/IGLV2-11/IGLV9-49/EXOSC6/IGKV6D-21/IGKV3-20/IGKV1-17/IGKV1D-43/IGKV2-30/IGKV1-5/IGKV2-28/IGKV3-15/IGLV2-8	47
GO:0038093	Fc receptor signaling pathway	36/1708	187/18493	1.69817e-05	0.000954334	0.000910344	FCGR2B/HSP90AB1/VAV2/CD200R1/PRKCE/IGKC/IGKV4-1/IGLV1-51/IGLV1-47/IGLV1-44/IGLV2-23/IGLV3-21/IGLV2-14/IGLV2-11/IGLC7/IGHV2-5/IGHV3-7/IGHV3-11/IGHV3-13/IGHV3-23/IGHV3-33/IGHV4-34/IGHV4-39/IGHV3-48/IGHV1-69/LAT/IGLC6/IGHV4-59/IGKV3-20/LILRA4/IGKV1-17/IGKV2-30/IGKV1-5/IGKV2-28/IGKV3-15/IGLV2-8	36
M.tb-infected vs M.tb-uninfected (CMV-uninfected infants) Downregulated gene sets
ID	Description	GeneRatio	BgRatio	pvalue	p.adjust	qvalue	geneID	Count
GO:0042119	neutrophil activation	213/2618	498/18493	3.39571e-56	2.07716e-52	1.49304e-52	FGR/FUCA2/ENPP4/KMT2E/ITGAL/LAMP2/ALDH3B1/MGST1/TYROBP/CAPN1/SLC11A1/ERP44/CD44/GRN/ATP6V0A1/VCL/TIMP2/HEXB/CYBA/ATP11B/SLC2A3/PKM/RHOA/ROCK1/ATP11A/KCNAB2/RAB27A/STK10/RAB7A/STXBP2/TOLLIP/PSEN1/PTPRC/RAB10/SCAMP1/B4GALT1/FTL/DYNLL1/LYZ/CMTM6/SNAP23/UNC13D/RAB18/SNAP29/MAPK1/TOM1/PYGL/ATP6V1D/MMP9/DNAJC5/CTSZ/SIRPB1/CST3/DNAJC3/PSMD7/COTL1/CRISPLD2/CPPED1/ASAH1/MAN2B1/CD33/TSPAN14/RAB5C/VAT1/LAMT…	213
GO:0002446	neutrophil mediated immunity	212/2618	499/18493	2.47603e-55	6.07601e-52	4.36738e-52	FGR/FUCA2/ENPP4/KMT2E/ITGAL/LAMP2/ALDH3B1/MGST1/TYROBP/CAPN1/SLC11A1/ERP44/CD44/GRN/ATP6V0A1/VCL/TIMP2/HEXB/CYBA/ATP11B/SLC2A3/PKM/RHOA/ROCK1/ATP11A/KCNAB2/RAB27A/WDR1/STK10/RAB7A/STXBP2/TOLLIP/PSEN1/PTPRC/RAB10/SCAMP1/B4GALT1/FTL/DYNLL1/LYZ/CMTM6/SNAP23/UNC13D/RAB18/SNAP29/MAPK1/TOM1/PYGL/ATP6V1D/MMP9/DNAJC5/CTSZ/SIRPB1/CST3/DNAJC3/PSMD7/COTL1/CRISPLD2/CPPED1/ASAH1/MAN2B1/CD33/TSPAN14/RAB5C/VAT1…	212
GO:0002283	neutrophil activation involved in immune response	209/2618	488/18493	2.9799e-55	6.07601e-52	4.36738e-52	FGR/FUCA2/ENPP4/ITGAL/LAMP2/ALDH3B1/MGST1/TYROBP/CAPN1/SLC11A1/ERP44/CD44/GRN/ATP6V0A1/VCL/TIMP2/HEXB/CYBA/ATP11B/SLC2A3/PKM/RHOA/ROCK1/ATP11A/KCNAB2/RAB27A/STK10/RAB7A/STXBP2/TOLLIP/PSEN1/PTPRC/RAB10/SCAMP1/B4GALT1/FTL/DYNLL1/LYZ/CMTM6/SNAP23/UNC13D/RAB18/SNAP29/MAPK1/TOM1/PYGL/ATP6V1D/MMP9/DNAJC5/CTSZ/SIRPB1/CST3/DNAJC3/PSMD7/COTL1/CRISPLD2/CPPED1/ASAH1/MAN2B1/CD33/TSPAN14/RAB5C/VAT1/LAMTOR3/MA…	209
GO:0043312	neutrophil degranulation	208/2618	485/18493	4.16265e-55	6.36573e-52	4.57562e-52	FGR/FUCA2/ENPP4/ITGAL/LAMP2/ALDH3B1/MGST1/TYROBP/CAPN1/SLC11A1/ERP44/CD44/GRN/ATP6V0A1/VCL/TIMP2/HEXB/CYBA/ATP11B/SLC2A3/PKM/RHOA/ROCK1/ATP11A/KCNAB2/RAB27A/STK10/RAB7A/STXBP2/TOLLIP/PSEN1/PTPRC/RAB10/SCAMP1/B4GALT1/FTL/DYNLL1/LYZ/CMTM6/SNAP23/UNC13D/RAB18/SNAP29/MAPK1/TOM1/PYGL/ATP6V1D/MMP9/DNAJC5/CTSZ/SIRPB1/CST3/DNAJC3/PSMD7/COTL1/CRISPLD2/CPPED1/ASAH1/MAN2B1/CD33/TSPAN14/RAB5C/VAT1/LAMTOR3/MA…	208
GO:0019882	antigen processing and presentation	68/2618	175/18493	4.85379e-16	1.86323e-13	1.33927e-13	HFE/KDM5D/SLC11A1/VAMP3/RAB27A/RAB7A/RAB10/DYNLL1/LAG3/ICAM1/CD209/KIF4A/SNAP23/SEC23A/RAB34/CLEC4A/SEC24A/CAPZA1/CTSD/RAB32/CLTA/CANX/LILRB2/DCTN4/CTSL/DYNC1LI2/THBS1/KIF23/ACTR1A/KIF11/ITGAV/CENPE/SEC24B/CLTC/ARF1/DYNC1LI1/FCGR1A/SEC24D/SAR1B/MR1/CD8A/FCER1G/ACE/RACGAP1/CTSS/KIF15/RAB8B/AP1G1/DCTN5/NOD2/RILP/DCTN2/RAB6A/SEC24C/HLA-DQB1/AP1S2/BCAP31/HLA-DQA1/AP2A1/DYNC1H1/FCGR1B/CAPZA2/HLA-C/HLA…	68
GO:0030099	myeloid cell differentiation	114/2618	405/18493	1.03583e-13	2.437e-11	1.75169e-11	CREBBP/KMT2E/PAFAH1B1/TYROBP/ARID4A/KITLG/KMT2C/PRKCQ/SPI1/CBFB/TFE3/TGFBR3/WDR1/ATP6AP1/ACTN1/PSEN1/OSTM1/NFE2L1/SNX10/PIR/AGO1/SIRT1/MYH9/EP300/MMP9/JAG1/CA2/LILRB1/TGFB1/DNASE2/DHRS7B/SLC11A2/LTBR/MAPK14/FOXO3/PTBP3/CSF3R/GPR68/ACVR2A/NCKAP1L/PDE1B/MT1G/MED1/AGO3/ZBTB46/PIAS3/LGALS3/PPARG/TSPAN2/NOTCH2/AGO4/ACVR1B/TLR4/TLR2/THBS1/TMOD3/VPS33A/CUL4A/ARNT/LYAR/PIK3R1/CDKN2B/PRKCA/KLF10/WASF2/ALA…	114
GO:0042110	T cell activation	114/2618	451/18493	1.86807e-10	1.93677e-08	1.39213e-08	ITGAL/HFE/FYN/SLC11A1/RC3H2/PRDM1/PRKCQ/RHOA/CBFB/RORA/RAB27A/PAG1/ITCH/PSEN1/PTPRC/BAX/P2RX7/LAG3/ICAM1/CD209/ABL1/LGALS1/MYH9/SLA2/NFATC2/SIRPB1/SMAD7/ELF4/CD276/CLPTM1/LILRB1/TGFB1/KDELR1/LFNG/VSIR/PPP3CB/ZMIZ1/CCL2/PRKAR1A/CD5/CLEC4A/CD86/LEPR/SASH3/NCKAP1L/PREX1/SDC4/CDH26/ZBTB1/LILRB2/LGALS3/PTPN22/ANXA1/HAVCR2/RC3H1/LCP1/GPNMB/RAC1/HLX/PDPK1/VAV1/DUSP10/PIK3R1/MSN/IL18/ADAM8/ADAM17/FAM49B/…	114
GO:0002768	immune response-regulating cell surface receptor signaling pathway	111/2618	445/18493	7.46315e-10	6.34057e-08	4.55754e-08	FGR/CREBBP/FYN/PRKCH/LCP2/PIK3CB/RC3H2/WNK1/ELMO2/PRKCQ/CBFB/PRKACA/PAG1/PSEN1/PTPRC/BAX/SPG21/CD209/ABL1/MAPK1/EP300/SLA2/NFATC2/HCK/CACNA1F/CD276/KCNN4/LILRB1/RAPGEF1/PPP3CB/MAPK10/ARPC3/CLEC4A/PDE4D/ACTR3/WIPF1/RAP1A/EIF2B2/ELF1/NCKAP1L/BTN2A3P/PLD2/NECTIN2/ARPC1B/LILRB2/LGALS3/RAF1/KRAS/PTPN22/C5AR2/RC3H1/RAC1/ABI1/ACTR2/CMTM3/PDPK1/VAV1/FCGR2A/MYO10/PIK3R1/PTPRJ/FCGR1A/NCK1/WASF2/FCER1G/RUNX…	111
GO:0050900	leukocyte migration	116/2618	478/18493	1.78077e-09	1.34481e-07	9.66637e-08	ITGAL/FYN/CD44/DAPK2/KITLG/PIK3CB/WNK1/CD84/RHOA/ROCK1/ATP1B3/WDR1/STK10/B4GALT1/ICAM1/GLG1/SLC7A8/HSD3B7/HMOX1/MYH9/MMP9/HCK/CD99L2/TGFB1/CCL24/SERPINE1/CREB3/GBF1/CCL2/BST1/SELPLG/MAPK14/GOLPH3/PDE4D/FN1/IL1R1/CD58/CSF3R/PGF/DUSP1/NCKAP1L/PREX1/SDC4/TREM1/NUP85/SBDS/ADGRE2/MPP1/LGALS3/C5AR2/ANXA1/P2RX4/RAC1/IL36B/THBS1/ADAM10/CYP19A1/ITGAV/ITGAX/SLC16A3/VAV1/NLRP12/S100A8/LYST/PIK3R1/PLA2G7/MSN…	116
GO:0045088	regulation of innate immune response	94/2618	365/18493	2.66676e-09	1.94197e-07	1.39587e-07	FGR/CREBBP/HFE/FYN/NR1H3/IFNGR1/PIAS1/CYBA/PRKACA/UBE2K/ITCH/LAG3/IRAK3/MUL1/CD209/NLRC4/EP300/HCK/RNF125/RIOK3/TLR8/LILRB1/CLEC4A/ERBIN/MAPKAPK3/SUMO1/TNFAIP3/MED1/SEC14L1/NECTIN2/NR1H2/RAF1/PPARG/KRAS/IRAK2/PTPN22/PUM1/UBQLN1/HAVCR2/TLR4/TLR2/PDPK1/ARRB2/VAV1/DUSP10/S100A8/SERPING1/UBC/ADAM8/PIK3AP1/FCER1G/IFNGR2/ITGB2/MAPKAPK2/CTSS/PRKCD/HMGB2/CLEC4E/CLEC4D/AP1G1/CRK/NOD2/CD300A/CD14/CLEC7A/RA…	94
GO:1903706	regulation of hemopoiesis	102/2618	418/18493	1.25319e-08	7.30073e-07	5.2477e-07	CREBBP/KMT2E/TYROBP/KITLG/KMT2C/RC3H2/PRDM1/PRKCQ/SPI1/RHOA/CBFB/TFE3/ATP6AP1/ITCH/PTPRC/AGO1/ABL1/FBXO7/EP300/NFATC2/JAG1/SMAD7/CA2/CLPTM1/LILRB1/TGFB1/VSIR/ZMIZ1/MAPK14/CD86/NFE2L2/FOXO3/CSF3R/GPR68/ACVR2A/SASH3/NCKAP1L/MED1/AGO3/PCID2/ZBTB1/ZBTB46/LILRB2/PIAS3/LGALS3/NOTCH2/AGO4/ANXA1/ACVR1B/RC3H1/HLX/TLR4/THBS1/CUL4A/ARNT/DUSP10/PIK3R1/IL18/ADAM8/PRKCA/KLF10/C1QC/RUNX1/ACE/ZBTB7B/TAL1/CCR1/HM…	102
GO:0002685	regulation of leukocyte migration	54/2618	180/18493	3.06872e-08	1.61822e-06	1.16316e-06	DAPK2/KITLG/WNK1/RHOA/STK10/ICAM1/HMOX1/CD99L2/TGFB1/CCL24/SERPINE1/CREB3/CCL2/BST1/MAPK14/IL1R1/PGF/DUSP1/NCKAP1L/MPP1/LGALS3/C5AR2/ANXA1/P2RX4/RAC1/THBS1/ADAM10/CYP19A1/PLA2G7/MSN/ADAM8/ADAM17/NBL1/ABR/IL6R/CCR1/CD300A/CX3CR1/PTAFR/PDGFD/PTGER4/C3AR1/OXSR1/CMKLR1/ANO6/CXCR2/CSF1/ADA/C5AR1/SPN/AIF1/GPSM3/LYN/CCL5	54
GO:0001819	positive regulation of cytokine production	101/2618	422/18493	4.20964e-08	2.1639e-06	1.55539e-06	FGR/CREBBP/BRCA1/SLC11A1/TBC1D23/CYBA/PRKCQ/HYAL2/RORA/PTPRC/P2RX7/ABL1/HMOX1/EP300/RNF125/RIOK3/TLR8/CD276/TGFB1/SERPINE1/MAPK14/PDE4D/CD86/IL1R1/ATF2/ARHGEF2/CD58/CLU/TNFRSF8/SASH3/LRRFIP1/C3/SEC14L1/LILRB2/PTPN22/ROCK2/PUM1/ANXA1/HAVCR2/AKIRIN2/IL36B/TLR4/TLR2/THBS1/CYP1B1/NLRP12/ARNT/PIK3R1/PTPRJ/IL18/ADAM8/ADAM17/FAM49B/FCER1G/RUNX1/IL6R/MAPKAPK2/HMGB2/CYBB/CLEC4E/NOD2/CTNNB1/PTAFR/AGPAT2/CD…	101
GO:0002683	negative regulation of immune system process	102/2618	437/18493	1.35869e-07	5.93652e-06	4.26711e-06	HFE/NR1H3/KITLG/RC3H2/CD84/CBFB/GAL/PAG1/ITCH/PTPRC/LAG3/IRAK3/MUL1/FBXO7/RHBDD3/HMOX1/SLA2/SMAD7/RNF125/RIOK3/LILRB1/TGFB1/VSIR/PPP3CB/CCL2/PRKAR1A/ERBIN/CD86/NFE2L2/TNFAIP3/GPR68/DUSP1/ELF1/SDC4/SEC14L1/ZBTB46/LILRB2/NR1H2/PIAS3/LGALS3/PPARG/PTPN22/C5AR2/UBQLN1/ANXA1/HAVCR2/RC3H1/GPNMB/HLX/TLR4/THBS1/CYP19A1/TMBIM6/CUL4A/PDPK1/ARRB2/DUSP10/PIK3R1/SERPING1/PTPRJ/MERTK/TSC22D3/NBL1/FCER1G/C1QC/RU…	102
GO:0050863	regulation of T cell activation	76/2618	305/18493	3.64454e-07	1.41099e-05	1.01421e-05	HFE/FYN/RC3H2/PRDM1/PRKCQ/RHOA/CBFB/PAG1/ITCH/PTPRC/LAG3/CD209/ABL1/LGALS1/NFATC2/SIRPB1/SMAD7/CD276/CLPTM1/LILRB1/TGFB1/VSIR/ZMIZ1/CCL2/PRKAR1A/CD5/CD86/SASH3/NCKAP1L/SDC4/ZBTB1/LILRB2/LGALS3/PTPN22/ANXA1/HAVCR2/RC3H1/GPNMB/RAC1/HLX/PDPK1/VAV1/DUSP10/PIK3R1/IL18/ADAM8/FAM49B/NCK1/RUNX1/ZBTB7B/IL6R/RAG1/NOD2/CD300A/CTNNB1/SOCS6/PRNP/CEBPB/RASGRP1/LEP/ZNF683/YES1/GRB2/PAK2/TIGIT/LILRB4/ADA/SRC/SPN…	76
GO:0071706	tumor necrosis factor superfamily cytokine production	41/2618	135/18493	9.46844e-07	3.13073e-05	2.25034e-05	TBC1D23/CYBA/PTPRC/IRAK3/TSPO/LILRB1/VSIR/CLEC4A/CD86/ARHGEF2/TNFAIP3/CLU/TNFRSF8/SASH3/SYT11/PTPN22/C5AR2/HAVCR2/GPNMB/TLR4/TLR2/THBS1/ARRB2/PIK3R1/PTPRJ/ADAM8/FCER1G/MAPKAPK2/AZI2/CYBB/NOD2/CX3CR1/PTAFR/CD14/RASGRP1/CD34/TLR1/LEP/SPN/SIRPA/UBE2J1	41
GO:0002228	natural killer cell mediated immunity	24/2618	62/18493	1.55377e-06	4.78991e-05	3.44294e-05	HFE/SLAMF7/RAB27A/LAG3/UNC13D/LILRB1/PRDX1/VAMP7/NECTIN2/KLRD1/HAVCR2/ARRB2/VAV1/LYST/IL18/AP1G1/CRK/RASGRP1/LEP/CADM1/LAMP1/NCR1/CLEC12B/PIK3R6	24
GO:0042267	natural killer cell mediated cytotoxicity	23/2618	58/18493	1.55827e-06	4.78991e-05	3.44294e-05	HFE/SLAMF7/RAB27A/LAG3/UNC13D/LILRB1/PRDX1/VAMP7/NECTIN2/HAVCR2/ARRB2/VAV1/LYST/IL18/AP1G1/CRK/RASGRP1/LEP/CADM1/LAMP1/NCR1/CLEC12B/PIK3R6	23
GO:0002695	negative regulation of leukocyte activation	46/2618	164/18493	2.53141e-06	7.25709e-05	5.21633e-05	HFE/NR1H3/RC3H2/CD84/CBFB/GAL/PAG1/ITCH/PTPRC/LAG3/FBXO7/RHBDD3/HMOX1/SLA2/SMAD7/LILRB1/TGFB1/VSIR/PRKAR1A/CD86/TNFAIP3/SDC4/LILRB2/LGALS3/PTPN22/ANXA1/HAVCR2/RC3H1/GPNMB/HLX/MERTK/RUNX1/ABR/ZBTB7B/CD300A/SOCS6/PRNP/CEBPB/TIGIT/CD300LF/SPN/PDCD1LG2/LST1/HLA-G/LYN/MILR1	46
GO:0034341	response to interferon-gamma	52/2618	198/18493	4.91668e-06	0.000119822	8.6127e-05	SLC11A1/NR1H3/VIM/CD44/IFNGR1/PIAS1/VAMP3/SEC61A1/STXBP2/ICAM1/HCK/STX4/CCL24/CCL2/ACTR3/KYNU/SUMO1/STXBP3/CD58/IRF6/MED1/NR1H2/PPARG/TLR4/TLR2/ACTR2/RAB20/SNCA/FCGR1A/VPS26B/IFNGR2/ZYX/CXCL16/PRKCD/PTAFR/KIF5B/TRIM8/PDE12/HLA-DQB1/CDC42EP4/DAPK1/HLA-DQA1/FCGR1B/SIRPA/AIF1/HLA-C/HLA-G/IFI30/SLC26A6/MRC1/CCL5/RAB7B	52
GO:0002262	myeloid cell homeostasis	40/2618	146/18493	2.03542e-05	0.000387872	0.000278799	KMT2E/ARID4A/KITLG/PIK3CB/SPI1/TGFBR3/NFE2L1/BAX/HMOX1/DNASE2/SLC11A2/MAPK14/PRDX1/FOXO3/PTBP3/ACVR2A/NCKAP1L/MED1/AMPD3/ANXA1/ACVR1B/TMOD3/ARNT/LYAR/SLC7A11/ADAM17/MERTK/ALAS2/FCER1G/G6PD/TAL1/NCSTN/HMGB2/BPGM/ZBTB7A/CXCR2/MAFB/HSPA1B/HSPA1A/LYN	40
GO:0043300	regulation of leukocyte degranulation	17/2618	42/18493	2.59167e-05	0.000480402	0.000345309	FGR/CD84/STXBP2/UNC13D/HMOX1/STX4/VAMP7/ADGRE2/PDPK1/FCER1G/ABR/ITGB2/AP1G1/CD300A/PTAFR/LAMP1/LYN	17
GO:0030101	natural killer cell activation	27/2618	85/18493	2.67636e-05	0.00049163	0.000353379	HFE/SLAMF7/PRDM1/RAB27A/PTPRC/UNC13D/RHBDD3/ELF4/PRDX1/VAMP7/ZBTB1/PTPN22/HAVCR2/SNX27/IL18/MERTK/ITGB2/IL6R/AP1G1/RASGRP1/LEP/ZNF683/LAMP1/BLOC1S3/NCR1/TOX/BAG6	27
GO:0072606	interleukin-8 secretion	13/2618	28/18493	4.13255e-05	0.000688795	0.000495099	HYAL2/CD58/CHI3L1/PTPN22/C5AR2/ANXA1/TLR2/RAB1A/CD14/TLR1/LEP/F2R/ANXA4	13
GO:0042533	tumor necrosis factor biosynthetic process	10/2618	20/18493	0.000150377	0.00198702	0.00142825	LILRB1/TNFRSF8/TLR4/THBS1/MAPKAPK2/CYBB/CX3CR1/TLR1/SPN/UBE2J1	10
GO:0042534	regulation of tumor necrosis factor biosynthetic process	10/2618	20/18493	0.000150377	0.00198702	0.00142825	LILRB1/TNFRSF8/TLR4/THBS1/MAPKAPK2/CYBB/CX3CR1/TLR1/SPN/UBE2J1	10
GO:0002703	regulation of leukocyte mediated immunity	47/2618	196/18493	0.000156264	0.00202944	0.00145874	FGR/HFE/CD84/STXBP2/PTPRC/P2RX7/LAG3/UNC13D/HMOX1/SMAD7/STX4/LILRB1/TGFB1/PPP3CB/SUPT6H/IL1R1/SASH3/VAMP7/C3/ZBTB1/ADGRE2/NECTIN2/HAVCR2/TLR4/PDPK1/ARRB2/VAV1/IL18/FAM49B/FCER1G/ABR/ITGB2/AP1G1/CRK/NOD2/CD300A/PTAFR/RASGRP1/LEP/CADM1/LAMP1/NCR1/HLA-C/HLA-G/LYN/CLEC12B/PIK3R6	47
GO:0002285	lymphocyte activation involved in immune response	42/2618	174/18493	0.000292767	0.00343734	0.00247073	ITGAL/SLC11A1/RC3H2/RORA/RAB27A/PSEN1/PTPRC/ICAM1/UNC13D/ABL1/LGALS1/SMAD7/LILRB1/TGFB1/LFNG/SUPT6H/CD86/VAMP7/LGALS3/NOTCH2/ANXA1/HAVCR2/RC3H1/LCP1/HLX/TLR4/IL18/FCER1G/ZBTB7B/EOMES/RNF168/ATP7A/CLEC4E/CLEC4D/AP1G1/PTGER4/GAPT/ZNF683/LAMP1/SEMA4A/ADA/SPN	42
GO:0001818	negative regulation of cytokine production	56/2618	256/18493	0.000502251	0.00513758	0.00369284	HFE/SLC11A1/HOMER3/CD84/ITCH/PTPRC/LAG3/IRAK3/MUL1/HMOX1/TSPO/SMAD7/RNF125/TLR8/ABCD1/LILRB1/TGFB1/TAX1BP1/VSIR/CLEC4A/ERBIN/FN1/TNFAIP3/ADCY7/SRGN/NCKAP1L/SYT11/PTPN22/C5AR2/ANXA1/HAVCR2/GPNMB/RAC1/KLF4/TLR4/ARRB1/THBS1/ARRB2/NLRP12/MERTK/CX3CR1/PTGER4/PRNP/CD34/CMKLR1/GBA/RNF135/TIGIT/NPLOC4/TBK1/ANXA4/PDCD1LG2/SIRPA/GPATCH3/PPP1R11/OTUD7B	56
GO:2000482	regulation of interleukin-8 secretion	10/2618	24/18493	0.00093006	0.0083419	0.00599608	HYAL2/CD58/PTPN22/C5AR2/ANXA1/TLR2/CD14/TLR1/F2R/ANXA4	10
GO:1905523	positive regulation of macrophage migration	8/2618	17/18493	0.00117336	0.00995488	0.00715548	MAPK14/P2RX4/THBS1/C3AR1/CMKLR1/CSF1/C5AR1/CCL5	8
CMV-infected vs CMV-uninfected Upregulated gene sets
ID	Description	GeneRatio	BgRatio	pvalue	p.adjust	qvalue	geneID	Count
GO:0002449	lymphocyte mediated immunity	62/1264	344/18493	1.59009e-12	8.95751e-10	8.39122e-10	PRKCZ/RAB27A/TBX21/DLG1/UNG/LAG3/IL12RB1/GZMB/CORO1A/TSTA3/GATA3/BTN3A3/KLRD1/CD96/CD8A/SLAMF6/RNF168/SHLD1/PRF1/CADM1/SH2D1A/HMGB1/GZMM/NCR3/KLRC2/HLA-H/HLA-A/IGKC/IGKV4-1/IGLV7-43/IGLV3-27/IGLV3-25/IGLV3-19/IGLV2-11/IGLV3-1/IGLC2/IGLC3/TRBC1/TRBC2/TRDC/IGHG4/IGHA1/IGHG1/IGHV3-7/IGHV1-24/IGHV4-34/IGHV1-45/IGHV2-70D/EXOSC6/IGHV3-64/HLA-B/IGKV2D-30/IGKV3-20/IGKV1-17/IGKV1-16/IGKV2-30/IGKV1-12/IGKV…	62
GO:0006958	complement activation, classical pathway	32/1264	137/18493	5.62523e-10	2.37666e-07	2.22641e-07	IGKC/IGKV4-1/IGLV7-43/IGLV3-27/IGLV3-25/IGLV3-19/IGLV2-11/IGLV3-1/IGLC2/IGLC3/TRBC1/TRBC2/TRDC/IGHG4/IGHA1/IGHG1/IGHV3-7/IGHV1-24/IGHV4-34/IGHV1-45/IGHV2-70D/IGHV3-64/IGKV2D-30/IGKV3-20/IGKV1-17/IGKV1-16/IGKV2-30/IGKV1-12/IGKV1-5/IGHV1OR15-1/IGKV1D-12/IGHV1-69D	32
GO:0002460	adaptive immune response based on somatic recombination of immune receptors built from immunoglobulin superfamily domains	56/1264	354/18493	3.13202e-09	1.05862e-06	9.91698e-07	PRKCQ/PRKCZ/RORA/RAB27A/TBX21/DLG1/UNG/IL12RB1/TSTA3/GATA3/BTN3A3/CCR2/CD8A/SLAMF6/RNF168/SHLD1/PRF1/HMGB1/SPN/GZMM/HLA-H/HLA-A/IGKC/IGKV4-1/IGLV7-43/IGLV3-27/IGLV3-25/IGLV3-19/IGLV2-11/IGLV3-1/IGLC2/IGLC3/TRBC1/TRBC2/TRDC/IGHG4/IGHA1/IGHG1/IGHV3-7/IGHV1-24/IGHV4-34/IGHV1-45/IGHV2-70D/EXOSC6/IGHV3-64/HLA-B/IGKV2D-30/IGKV3-20/IGKV1-17/IGKV1-16/IGKV2-30/IGKV1-12/IGKV1-5/IGHV1OR15-1/IGKV1D-12/IGHV1-…	56
GO:0002377	immunoglobulin production	36/1264	180/18493	4.49077e-09	1.42301e-06	1.33305e-06	POLQ/TBX21/UNG/IL5/RNF168/SHLD1/IGKC/IGKV4-1/IGLV8-61/IGLV5-52/IGLV7-43/IGLV3-27/IGLV3-25/IGLV3-19/IGLV2-18/IGLV3-12/IGLV2-11/IGLV3-10/IGLV3-1/TRAV14DV4/TRAV19/TRAV38-2DV8/TRAV40/IGLV9-49/EXOSC6/IGKV2D-30/IGKV3-20/IGKV1-17/IGKV1-16/IGKV2-24/IGKV1-9/IGKV2-30/IGKV1-12/IGKV1-5/IGKV1D-13/IGKV1D-12	36
GO:0002455	humoral immune response mediated by circulating immunoglobulin	32/1264	149/18493	5.23049e-09	1.55992e-06	1.4613e-06	IGKC/IGKV4-1/IGLV7-43/IGLV3-27/IGLV3-25/IGLV3-19/IGLV2-11/IGLV3-1/IGLC2/IGLC3/TRBC1/TRBC2/TRDC/IGHG4/IGHA1/IGHG1/IGHV3-7/IGHV1-24/IGHV4-34/IGHV1-45/IGHV2-70D/IGHV3-64/IGKV2D-30/IGKV3-20/IGKV1-17/IGKV1-16/IGKV2-30/IGKV1-12/IGKV1-5/IGHV1OR15-1/IGKV1D-12/IGHV1-69D	32
GO:0002429	immune response-activating cell surface receptor signaling pathway	60/1264	414/18493	2.47818e-08	5.02576e-06	4.70803e-06	PRKCH/PRKCQ/EIF2B3/ICAM3/EZR/GRAP2/NFATC2/GATA3/BTN3A3/WIPF1/BTN1A1/PTPN22/SKAP1/PRKACB/NCK1/CD3G/CD3D/CMKLR1/SLC39A10/CD3E/NCR3/MUC12/IGKC/IGKV4-1/IGLV7-43/IGLV3-27/IGLV3-25/IGLV3-19/IGLV2-11/IGLV3-1/IGLC2/IGLC3/TRBC1/TRBC2/TRAV19/TRDC/IGHG4/IGHA1/IGHG1/IGHV3-7/IGHV1-24/IGHV4-34/IGHV1-45/IGHV2-70D/IGHV3-64/HLA-DPB1/HLA-DQA2/IGKV2D-30/IGKV3-20/IGKV1-17/IGKV1-16/IGKV2-30/IGKV1-12/IGKV1-5/KLRC4-KLR…	60
GO:0002768	immune response-regulating cell surface receptor signaling pathway	63/1264	445/18493	2.72522e-08	5.31417e-06	4.97821e-06	PRKCH/MAPK9/PRKCQ/EIF2B3/NFATC3/ICAM3/EZR/GRAP2/NFATC2/GATA3/BTN3A3/WIPF1/BTN1A1/KIR2DL1/PTPN22/SKAP1/PRKACB/NCK1/CD3G/CD3D/CMKLR1/SLC39A10/CD3E/NCR3/MUC12/IGKC/IGKV4-1/IGLV7-43/IGLV3-27/IGLV3-25/IGLV3-19/IGLV2-11/IGLV3-1/IGLC2/IGLC3/TRBC1/TRBC2/TRAV19/TRDC/IGHG4/IGHA1/IGHG1/IGHV3-7/IGHV1-24/IGHV4-34/IGHV1-45/IGHV2-70D/IGHV3-64/HLA-DPB1/HLA-DQA2/IGKV2D-30/IGKV3-20/IGKV1-17/IGKV1-16/IGKV2-30/IGKV1…	63
GO:0006956	complement activation	33/1264	170/18493	4.19132e-08	7.58928e-06	7.10948e-06	KRT1/IGKC/IGKV4-1/IGLV7-43/IGLV3-27/IGLV3-25/IGLV3-19/IGLV2-11/IGLV3-1/IGLC2/IGLC3/TRBC1/TRBC2/TRDC/IGHG4/IGHA1/IGHG1/IGHV3-7/IGHV1-24/IGHV4-34/IGHV1-45/IGHV2-70D/IGHV3-64/IGKV2D-30/IGKV3-20/IGKV1-17/IGKV1-16/IGKV2-30/IGKV1-12/IGKV1-5/IGHV1OR15-1/IGKV1D-12/IGHV1-69D	33
GO:0016064	immunoglobulin mediated immune response	37/1264	212/18493	1.18257e-07	1.99854e-05	1.87219e-05	TBX21/UNG/RNF168/SHLD1/IGKC/IGKV4-1/IGLV7-43/IGLV3-27/IGLV3-25/IGLV3-19/IGLV2-11/IGLV3-1/IGLC2/IGLC3/TRBC1/TRBC2/TRDC/IGHG4/IGHA1/IGHG1/IGHV3-7/IGHV1-24/IGHV4-34/IGHV1-45/IGHV2-70D/EXOSC6/IGHV3-64/IGKV2D-30/IGKV3-20/IGKV1-17/IGKV1-16/IGKV2-30/IGKV1-12/IGKV1-5/IGHV1OR15-1/IGKV1D-12/IGHV1-69D	37
GO:0019724	B cell mediated immunity	37/1264	213/18493	1.33879e-07	2.07219e-05	1.94118e-05	TBX21/UNG/RNF168/SHLD1/IGKC/IGKV4-1/IGLV7-43/IGLV3-27/IGLV3-25/IGLV3-19/IGLV2-11/IGLV3-1/IGLC2/IGLC3/TRBC1/TRBC2/TRDC/IGHG4/IGHA1/IGHG1/IGHV3-7/IGHV1-24/IGHV4-34/IGHV1-45/IGHV2-70D/EXOSC6/IGHV3-64/IGKV2D-30/IGKV3-20/IGKV1-17/IGKV1-16/IGKV2-30/IGKV1-12/IGKV1-5/IGHV1OR15-1/IGKV1D-12/IGHV1-69D	37
GO:0002440	production of molecular mediator of immune response	41/1264	268/18493	9.81133e-07	9.19637e-05	8.61497e-05	POLQ/PRKCZ/TBX21/DLG1/UNG/GATA3/IL5/CD96/RNF168/TLR3/SHLD1/IGKC/IGKV4-1/IGLV8-61/IGLV5-52/IGLV7-43/IGLV3-27/IGLV3-25/IGLV3-19/IGLV2-18/IGLV3-12/IGLV2-11/IGLV3-10/IGLV3-1/TRAV14DV4/TRAV19/TRAV38-2DV8/TRAV40/IGLV9-49/EXOSC6/IGKV2D-30/IGKV3-20/IGKV1-17/IGKV1-16/IGKV2-24/IGKV1-9/IGKV2-30/IGKV1-12/IGKV1-5/IGKV1D-13/IGKV1D-12	41
GO:0038095	Fc-epsilon receptor signaling pathway	24/1264	117/18493	1.01577e-06	9.19637e-05	8.61497e-05	MAPK9/PRKCQ/NFATC3/GRAP2/NFATC2/IGKC/IGKV4-1/IGLV7-43/IGLV3-27/IGLV3-25/IGLV3-19/IGLV2-11/IGLV3-1/IGHV3-7/IGHV4-34/IGKV2D-30/IGKV3-20/IGKV1-17/IGKV1-16/IGKV2-30/IGKV1-12/IGKV1-5/IGHV1OR15-1/IGKV1D-12	24
GO:0002697	regulation of immune effector process	56/1264	439/18493	4.60026e-06	0.00033319	0.000312126	TSPAN32/CD84/PRKCZ/TBX21/UNG/LAG3/IL12RB1/GATA3/IL5/VAMP8/CCR2/EIF2AK4/CD96/NLRX1/SLAMF6/AIM2/DNASE1L3/TLR3/SHLD1/RNF26/ZNF683/ELMOD2/CADM1/SH2D1A/IFNLR1/BCR/HMGB1/TRAF3IP1/NCR3/HLA-H/HLA-A/IGKC/IGKV4-1/IGLV7-43/IGLV3-27/IGLV3-25/IGLV3-19/IGLV2-11/IGLV3-1/IGHG4/IGHG1/IGHV3-7/IGHV4-34/EXOSC6/HLA-B/IGKV2D-30/APOBEC3G/IGKV3-20/IGKV1-17/IGKV1-16/IGKV2-30/IGKV1-12/IGKV1-5/KLRC4-KLRK1/IGHV1OR15-1/IGKV1…	56
GO:0050851	antigen receptor-mediated signaling pathway	38/1264	259/18493	6.65086e-06	0.000467851	0.000438273	PRKCH/PRKCQ/EIF2B3/EZR/GRAP2/NFATC2/GATA3/BTN3A3/BTN1A1/PTPN22/SKAP1/NCK1/CD3G/CD3D/SLC39A10/CD3E/IGKC/IGLC2/IGLC3/TRBC1/TRBC2/TRAV19/TRDC/IGHG4/IGHA1/IGHG1/IGHV3-7/IGHV1-24/IGHV4-34/IGHV1-45/IGHV2-70D/IGHV3-64/HLA-DPB1/HLA-DQA2/IGHV1OR15-1/TRBV12-3/TRAC/IGHV1-69D	38
GO:0030449	regulation of complement activation	21/1264	107/18493	9.79906e-06	0.000645211	0.00060442	IGKC/IGKV4-1/IGLV7-43/IGLV3-27/IGLV3-25/IGLV3-19/IGLV2-11/IGLV3-1/IGHG4/IGHG1/IGHV3-7/IGHV4-34/IGKV2D-30/IGKV3-20/IGKV1-17/IGKV1-16/IGKV2-30/IGKV1-12/IGKV1-5/IGHV1OR15-1/IGKV1D-12	21
GO:0002433	immune response-regulating cell surface receptor signaling pathway involved in phagocytosis	24/1264	135/18493	1.37795e-05	0.000841711	0.000788498	WIPF1/NCK1/CD3G/IGKC/IGKV4-1/IGLV7-43/IGLV3-27/IGLV3-25/IGLV3-19/IGLV2-11/IGLV3-1/IGHG4/IGHG1/IGHV3-7/IGHV4-34/IGKV2D-30/IGKV3-20/IGKV1-17/IGKV1-16/IGKV2-30/IGKV1-12/IGKV1-5/IGHV1OR15-1/IGKV1D-12	24
GO:0038096	Fc-gamma receptor signaling pathway involved in phagocytosis	24/1264	135/18493	1.37795e-05	0.000841711	0.000788498	WIPF1/NCK1/CD3G/IGKC/IGKV4-1/IGLV7-43/IGLV3-27/IGLV3-25/IGLV3-19/IGLV2-11/IGLV3-1/IGHG4/IGHG1/IGHV3-7/IGHV4-34/IGKV2D-30/IGKV3-20/IGKV1-17/IGKV1-16/IGKV2-30/IGKV1-12/IGKV1-5/IGHV1OR15-1/IGKV1D-12	24
GO:0050871	positive regulation of B cell activation	25/1264	144/18493	1.40829e-05	0.000850005	0.000796267	TBX21/UNG/NFATC2/IL5/CD320/SHLD1/SLC39A10/IGKC/IGLC2/IGLC3/TRBC1/TRBC2/TRDC/IGHG4/IGHA1/IGHG1/IGHV3-7/IGHV1-24/IGHV4-34/IGHV1-45/IGHV2-70D/EXOSC6/IGHV3-64/IGHV1OR15-1/IGHV1-69D	25
GO:0038094	Fc-gamma receptor signaling pathway	24/1264	138/18493	2.01546e-05	0.00114813	0.00107555	WIPF1/NCK1/CD3G/IGKC/IGKV4-1/IGLV7-43/IGLV3-27/IGLV3-25/IGLV3-19/IGLV2-11/IGLV3-1/IGHG4/IGHG1/IGHV3-7/IGHV4-34/IGKV2D-30/IGKV3-20/IGKV1-17/IGKV1-16/IGKV2-30/IGKV1-12/IGKV1-5/IGHV1OR15-1/IGKV1D-12	24
GO:0002431	Fc receptor mediated stimulatory signaling pathway	24/1264	140/18493	2.57742e-05	0.00142038	0.00133059	WIPF1/NCK1/CD3G/IGKC/IGKV4-1/IGLV7-43/IGLV3-27/IGLV3-25/IGLV3-19/IGLV2-11/IGLV3-1/IGHG4/IGHG1/IGHV3-7/IGHV4-34/IGKV2D-30/IGKV3-20/IGKV1-17/IGKV1-16/IGKV2-30/IGKV1-12/IGKV1-5/IGHV1OR15-1/IGKV1D-12	24
GO:0038093	Fc receptor signaling pathway	29/1264	187/18493	2.81553e-05	0.00151672	0.00142083	MAPK9/PRKCQ/NFATC3/GRAP2/NFATC2/WIPF1/NCK1/CD3G/IGKC/IGKV4-1/IGLV7-43/IGLV3-27/IGLV3-25/IGLV3-19/IGLV2-11/IGLV3-1/IGHG4/IGHG1/IGHV3-7/IGHV4-34/IGKV2D-30/IGKV3-20/IGKV1-17/IGKV1-16/IGKV2-30/IGKV1-12/IGKV1-5/IGHV1OR15-1/IGKV1D-12	29
GO:0051249	regulation of lymphocyte activation	56/1264	472/18493	3.82655e-05	0.00192085	0.00179942	PRKCQ/PRKCZ/TBX21/DLG1/UNG/LAG3/IL12RB1/RHBDD3/GRAP2/NFATC2/CORO1A/RASAL3/GATA3/IL5/CD2/CCR2/LAX1/PTPN22/SOD1/GNRH1/NCK1/IKZF3/VCAM1/CD320/CCDC88B/SHLD1/TBC1D10C/ZNF683/TIGIT/PDCD1/HMGB1/SLC39A10/SPN/TOX/CD3E/IGKC/IGLC2/IGLC3/TRBC1/TRBC2/TRDC/IGHG4/IGHA1/IGHG1/IGHV3-7/IGHV1-24/IGHV4-34/IGHV1-45/IGHV2-70D/EXOSC6/IGHV3-64/HLA-DPB1/KLRC4-KLRK1/IGHV1OR15-1/CCL5/IGHV1-69D	56
GO:0051251	positive regulation of lymphocyte activation	43/1264	333/18493	4.27851e-05	0.00208578	0.00195391	PRKCQ/PRKCZ/TBX21/UNG/IL12RB1/GRAP2/NFATC2/CORO1A/RASAL3/GATA3/IL5/CCR2/NCK1/VCAM1/CD320/CCDC88B/SHLD1/PDCD1/HMGB1/SLC39A10/TOX/CD3E/IGKC/IGLC2/IGLC3/TRBC1/TRBC2/TRDC/IGHG4/IGHA1/IGHG1/IGHV3-7/IGHV1-24/IGHV4-34/IGHV1-45/IGHV2-70D/EXOSC6/IGHV3-64/HLA-DPB1/KLRC4-KLRK1/IGHV1OR15-1/CCL5/IGHV1-69D	43
GO:0045123	cellular extravasation	13/1264	54/18493	5.28585e-05	0.00248141	0.00232454	PIK3CG/SELPLG/PODXL2/CCR2/ITGB7/JAML/VCAM1/CX3CR1/PDGFD/BCR/GCNT1/SPN/ITGA1	13
GO:0050853	B cell receptor signaling pathway	21/1264	122/18493	7.59112e-05	0.00320725	0.00300448	PRKCH/NFATC2/PTPN22/SLC39A10/IGKC/IGLC2/IGLC3/TRBC1/TRBC2/TRDC/IGHG4/IGHA1/IGHG1/IGHV3-7/IGHV1-24/IGHV4-34/IGHV1-45/IGHV2-70D/IGHV3-64/IGHV1OR15-1/IGHV1-69D	21
GO:0002920	regulation of humoral immune response	21/1264	126/18493	0.000122376	0.0045621	0.00427368	IGKC/IGKV4-1/IGLV7-43/IGLV3-27/IGLV3-25/IGLV3-19/IGLV2-11/IGLV3-1/IGHG4/IGHG1/IGHV3-7/IGHV4-34/IGKV2D-30/IGKV3-20/IGKV1-17/IGKV1-16/IGKV2-30/IGKV1-12/IGKV1-5/IGHV1OR15-1/IGKV1D-12	21
GO:0050864	regulation of B cell activation	27/1264	183/18493	0.000124929	0.00462328	0.004331	TBX21/UNG/NFATC2/IL5/IKZF3/CD320/SHLD1/TBC1D10C/SLC39A10/IGKC/IGLC2/IGLC3/TRBC1/TRBC2/TRDC/IGHG4/IGHA1/IGHG1/IGHV3-7/IGHV1-24/IGHV4-34/IGHV1-45/IGHV2-70D/EXOSC6/IGHV3-64/IGHV1OR15-1/IGHV1-69D	27
GO:0002696	positive regulation of leukocyte activation	45/1264	372/18493	0.000137252	0.00493525	0.00462324	PRKCQ/PRKCZ/TBX21/UNG/IL12RB1/GRAP2/NFATC2/CORO1A/RASAL3/GATA3/IL5/CD2/VAMP8/CCR2/NCK1/VCAM1/CD320/CCDC88B/SHLD1/PDCD1/HMGB1/SLC39A10/TOX/CD3E/IGKC/IGLC2/IGLC3/TRBC1/TRBC2/TRDC/IGHG4/IGHA1/IGHG1/IGHV3-7/IGHV1-24/IGHV4-34/IGHV1-45/IGHV2-70D/EXOSC6/IGHV3-64/HLA-DPB1/KLRC4-KLRK1/IGHV1OR15-1/CCL5/IGHV1-69D	45
GO:0050901	leukocyte tethering or rolling	8/1264	25/18493	0.000176228	0.00619053	0.00579917	SELPLG/PODXL2/CCR2/ITGB7/VCAM1/CX3CR1/GCNT1/SPN	8
CMV-infected vs CMV-uninfected Downregulated gene sets
ID	Description	GeneRatio	BgRatio	pvalue	p.adjust	qvalue	geneID	Count
GO:0042119	neutrophil activation	110/1786	498/18493	5.30928e-17	7.29119e-14	5.02113e-14	KMT2E/ALDH3B1/PLAUR/ALOX5/SLC11A1/ERP44/RNASET2/CD44/TNFRSF1B/HEBP2/SLC2A3/PKM/ATP11A/PLD1/RAB7A/PGM1/PSEN1/CD59/CYB5R3/TOM1/PYGL/GLA/DNAJC3/CRISPLD2/CTSH/GPI/SIGLEC5/P2RX1/ALDOC/LAMTOR3/NFKB1/MANBA/BST1/TCIRG1/VNN1/GCA/IL18RAP/QPCT/QSOX1/PADI2/CYSTM1/TNFAIP6/CXCL6/C3/CD93/PTPRB/UBR4/SIGLEC9/ADGRE3/AMPD3/CD63/TMBIM1/CKAP4/TLR2/ITGAV/GPR84/GALNS/TRPM2/CD53/FCGR2A/S100A8/DEGS1/PLAC8/DOK3/DYNLT1/ALD…	110
GO:0002446	neutrophil mediated immunity	110/1786	499/18493	6.18526e-17	7.29119e-14	5.02113e-14	KMT2E/ALDH3B1/PLAUR/ALOX5/SLC11A1/ERP44/RNASET2/CD44/TNFRSF1B/HEBP2/SLC2A3/PKM/ATP11A/PLD1/RAB7A/PGM1/PSEN1/CD59/CYB5R3/TOM1/PYGL/GLA/DNAJC3/CRISPLD2/CTSH/GPI/SIGLEC5/P2RX1/ALDOC/LAMTOR3/NFKB1/MANBA/BST1/TCIRG1/VNN1/GCA/QPCT/QSOX1/PADI2/CYSTM1/TNFAIP6/CXCL6/C3/CD93/PTPRB/UBR4/SIGLEC9/ADGRE3/AMPD3/CD63/TMBIM1/CKAP4/IL6/TLR2/ITGAV/GPR84/GALNS/TRPM2/CD53/FCGR2A/S100A8/DEGS1/PLAC8/DOK3/DYNLT1/ALDOA/A…	110
GO:0002283	neutrophil activation involved in immune response	107/1786	488/18493	2.4776e-16	2.43383e-13	1.67607e-13	ALDH3B1/PLAUR/ALOX5/SLC11A1/ERP44/RNASET2/CD44/TNFRSF1B/HEBP2/SLC2A3/PKM/ATP11A/PLD1/RAB7A/PGM1/PSEN1/CD59/CYB5R3/TOM1/PYGL/GLA/DNAJC3/CRISPLD2/CTSH/GPI/SIGLEC5/P2RX1/ALDOC/LAMTOR3/NFKB1/MANBA/BST1/TCIRG1/VNN1/GCA/QPCT/QSOX1/PADI2/CYSTM1/TNFAIP6/C3/CD93/PTPRB/UBR4/SIGLEC9/ADGRE3/AMPD3/CD63/TMBIM1/CKAP4/TLR2/ITGAV/GPR84/GALNS/TRPM2/CD53/FCGR2A/S100A8/DEGS1/PLAC8/DOK3/DYNLT1/ALDOA/CDA/FCER1G/PDXK/C…	107
GO:0043312	neutrophil degranulation	106/1786	485/18493	4.34307e-16	3.65686e-13	2.51833e-13	ALDH3B1/PLAUR/ALOX5/SLC11A1/ERP44/RNASET2/CD44/TNFRSF1B/HEBP2/SLC2A3/PKM/ATP11A/PLD1/RAB7A/PGM1/PSEN1/CD59/CYB5R3/TOM1/PYGL/GLA/DNAJC3/CRISPLD2/CTSH/GPI/SIGLEC5/P2RX1/ALDOC/LAMTOR3/NFKB1/MANBA/BST1/TCIRG1/VNN1/GCA/QPCT/QSOX1/PADI2/CYSTM1/TNFAIP6/C3/CD93/PTPRB/UBR4/SIGLEC9/ADGRE3/AMPD3/CD63/TMBIM1/CKAP4/TLR2/ITGAV/GPR84/GALNS/TRPM2/CD53/FCGR2A/S100A8/DEGS1/PLAC8/DOK3/DYNLT1/ALDOA/CDA/FCER1G/PDXK/C…	106
GO:0001819	positive regulation of cytokine production	94/1786	422/18493	6.12412e-15	3.00796e-12	2.07146e-12	TSPAN6/SLC11A1/NLRP2/FLT4/FOXP3/BCL3/PTGS2/TXK/NFKB2/IL4R/IL12RB2/OSM/HIF1A/NFATC4/CD40/CCM2L/RIOK3/RGCC/CD276/RIPK2/IL7/TGFB1/SERPINE1/NFKB1/PANX1/BIRC2/IL23A/GAPDH/CD83/CD86/WNT5A/IL1A/ARHGEF2/NR4A3/CD274/EGR1/TNFRSF8/ARFGEF2/IL1B/C3/CCR7/TICAM1/RARA/HILPDA/IL6/IL10/IL36G/IL1RN/IL36RN/FLOT1/TLR2/THBS1/SEMA7A/FURIN/NLRP12/BCL10/XCL1/TMF1/ADAM17/HK1/MAPK13/FCER1G/RUNX1/IL6R/IL23R/NLRP3/SYK/NOD2/T…	94
GO:0050900	leukocyte migration	101/1786	478/18493	2.19559e-14	9.24344e-12	6.36556e-12	CD44/STAP1/PIK3CB/ATP1B3/ADD2/EDN1/CXCL2/GP6/ICAM1/HCK/FLT1/CCL22/SLC7A6/TNFRSF10A/TGFB1/WASL/SERPINE1/BST1/IL23A/VEGFA/THBS4/WNT5A/CCL20/CD48/PADI2/CSF3R/DUSP1/TNFRSF10B/DBH/SDC4/TREM1/CXCL6/IL1B/CCR7/ADGRE2/P2RX4/DYSF/IL6/MYO1G/IL10/IL36G/IL1RN/IL36RN/THBS1/ITGAV/SLC16A3/TRPM2/APP/NLRP12/XCL1/S100A8/ITGA9/ESAM/FER/PTPRO/ADAM17/ANGPT1/JAM2/SLC7A7/CXCL13/MMP14/F11R/FCER1G/CXCR5/IL6R/ITGA5/CXCL16/…	101
GO:0030098	lymphocyte differentiation	72/1786	344/18493	1.96328e-10	4.62863e-08	3.18754e-08	FOXP3/BCL3/IL4R/TYRO3/RIPK2/IL7/TGFB1/GLI3/TNFSF8/ZMIZ1/ZBTB16/IL23A/CD83/VNN1/BCL6/CD86/ID2/LEPR/CR2/EGR1/FLT3/INHBA/SOX4/TNFSF9/CCR7/DNAJB9/DLL4/PRR7/RARA/NOTCH2/IL2RA/DOCK10/IL6/IL10/RORC/ZC3H8/NFKBIZ/ZEB1/ADAM17/ZFP36L2/MMP14/FCER1G/RUNX1/IL23R/NLRP3/ZC3H12A/SYK/ATP7A/CLEC4D/CTNNB1/IRF2BP2/STAT3/IL7R/GPR183/CHD7/CCL19/LEP/PTPN2/CLCF1/FZD8/EGR3/ADGRG3/SOCS1/TNFRSF18/IL27/NTRK1/DLL1/PNP/CR1/FNI…	72
GO:0071706	tumor necrosis factor superfamily cytokine production	38/1786	135/18493	8.39968e-10	1.23744e-07	8.52172e-08	FOXP3/BCL3/IRAK3/NFATC4/RIPK2/LILRB1/IL23A/CD86/WNT5A/ARHGEF2/SLAMF1/CD274/TNFRSF8/ARFGEF2/TICAM1/ZFP36/RARA/SELENOS/IL10/TLR2/THBS1/APP/BCL10/ANGPT1/FCER1G/AZI2/ZC3H12A/NOD2/CD14/CCL19/TLR1/LEP/CHRNA7/SIRPA/UBE2J1/ORM2/ORM1/CCL3	38
GO:1903708	positive regulation of hemopoiesis	45/1786	183/18493	2.9029e-09	3.16846e-07	2.18199e-07	FOXP3/IL4R/HIF1A/JAG1/CA2/RIPK2/IL7/TGFB1/GLI3/ZMIZ1/CSF3/ZBTB16/IL23A/CD83/VNN1/SMAP1/BCL6/CD86/ID2/ACVR2A/INHBA/TNFSF9/LIF/RARA/IL2RA/ACVR1B/RB1/NFKBIZ/KLF10/MMP14/RUNX1/IL23R/NLRP3/IL20/SYK/STAT3/IL7R/FOS/CCL19/TRIB1/EGR3/SOCS1/PNP/MIR221/TNF	45
GO:0034341	response to interferon-gamma	47/1786	198/18493	4.44379e-09	4.36529e-07	3.00619e-07	SLC11A1/VIM/CD44/SEC61A1/TXK/EDN1/ICAM1/CD40/HCK/CCL22/MEFV/STX4/CYP27B1/GAPDH/WNT5A/CCL20/TRIM25/FLNB/TLR2/RAB20/IFITM3/XCL1/SNCA/NCAM1/FCGR1A/IFNGR2/CXCL16/IL23R/PRKCD/CCL19/PTPN2/CDC42EP4/SOCS3/SOCS1/DAPK1/MYO1C/FCGR1B/SIRPA/HLA-DRB5/HLA-C/RAB12/IFI30/CCL23/CCL4/CCL18/CCL3L3/CCL3	47
GO:0042035	regulation of cytokine biosynthetic process	29/1786	94/18493	8.4776e-09	7.50589e-07	5.16899e-07	FOXP3/BCL3/IGF2BP2/CD276/LILRB1/NFKB1/CD86/WNT5A/IL1A/EGR1/TNFRSF8/INHBA/IL1B/TICAM1/ZFP36/IL6/IL10/KLF4/THBS1/NLRP12/BCL10/IGF2BP1/SYK/CEBPB/RELA/TLR1/IL27/UBE2J1/TNF	29
GO:0050870	positive regulation of T cell activation	47/1786	202/18493	8.78701e-09	7.50589e-07	5.16899e-07	FOXP3/TFRC/IL4R/CD276/RIPK2/IL7/LILRB1/TGFB1/GLI3/MAP3K8/ZMIZ1/ZBTB16/IL23A/CD83/VNN1/BCL6/CD86/HES1/IGFBP2/CD274/IL1B/TNFSF9/CCR7/RARA/IL2RA/IL6/BCL10/XCL1/NFKBIZ/RUNX1/IL6R/IL23R/NLRP3/SYK/NOD2/TMIGD2/IL7R/CCL19/LEP/EGR3/PAK2/SOCS1/CD55/SRC/SIRPA/PNP/LYN	47
GO:0050663	cytokine secretion	48/1786	210/18493	1.12681e-08	8.73871e-07	6.01798e-07	NLRP2/FOXP3/IL4R/OSM/RGCC/RIPK2/LILRB1/PANX1/GAPDH/WNT5A/IL1A/IL1R2/CD274/SRGN/CCR7/DYSF/IL10/IL36RN/TLR2/LRRC32/RAB1A/ITGAV/NLRP12/TNFRSF21/NOTCH1/ANGPT1/HK1/NLRP3/ZC3H12A/SYK/ABCA1/NOD2/CD14/CCL19/TLR1/LEP/ALOX15B/SOCS1/IL1RAP/SRC/PNP/CRLF2/ORM2/ORM1/TNF/LYN/MMP12/CCL3	48
GO:0042089	cytokine biosynthetic process	30/1786	105/18493	3.385e-08	2.29324e-06	1.57926e-06	FOXP3/BCL3/IGF2BP2/CD276/LILRB1/NFKB1/CD86/WNT5A/IL1A/EGR1/TNFRSF8/INHBA/IL1B/TICAM1/ZFP36/IL6/IL10/KLF4/THBS1/NLRP12/BCL10/IGF2BP1/SYK/CEBPB/RELA/TLR1/IL1RAP/IL27/UBE2J1/TNF	30
GO:0002696	positive regulation of leukocyte activation	68/1786	372/18493	1.8089e-07	8.20126e-06	5.64786e-06	GAB2/STAP1/FOXP3/TFRC/IL4R/RIF1/CD40/STX4/CD276/RIPK2/IL7/LILRB1/TGFB1/GLI3/MAP3K8/ZMIZ1/BST1/ZBTB16/IL23A/CD83/VNN1/BCL6/CD86/WNT5A/HES1/IGFBP2/NR4A3/CD274/IL1B/TNFSF9/CCR7/TICAM1/NECTIN2/RARA/IL2RA/IL6/IL10/THBS1/APP/BCL10/XCL1/NFKBIZ/MMP14/FCER1G/RUNX1/IL6R/IL23R/NLRP3/SYK/CLEC4D/NOD2/TMIGD2/IL7R/GPR183/CCL19/LEP/CLCF1/EGR3/PAK2/SOCS1/IRS2/CD55/SRC/SIRPA/PNP/CRLF2/LYN/IGHV5-10-1	68
GO:0050707	regulation of cytokine secretion	41/1786	184/18493	2.69165e-07	1.14134e-05	7.8599e-06	NLRP2/FOXP3/IL4R/OSM/RGCC/RIPK2/LILRB1/PANX1/GAPDH/WNT5A/IL1A/IL1R2/CD274/SRGN/CCR7/IL10/IL36RN/TLR2/LRRC32/NLRP12/TNFRSF21/ANGPT1/HK1/NLRP3/ZC3H12A/SYK/NOD2/CD14/CCL19/TLR1/ALOX15B/SOCS1/IL1RAP/SRC/CRLF2/ORM2/ORM1/TNF/LYN/MMP12/CCL3	41
GO:0002687	positive regulation of leukocyte migration	31/1786	121/18493	3.05786e-07	1.27823e-05	8.80261e-06	EDN1/ICAM1/TGFB1/SERPINE1/IL23A/VEGFA/THBS4/WNT5A/CCL20/CCR7/P2RX4/DYSF/IL6/THBS1/APP/XCL1/ADAM17/CXCL13/MMP14/IL6R/FPR2/C3AR1/CCL19/OXSR1/VEGFB/ANO6/TNFRSF18/C5AR1/TNF/CCL4/CCL3	31
GO:0002822	regulation of adaptive immune response based on somatic recombination of immune receptors built from immunoglobulin superfamily domains	32/1786	144/18493	5.64624e-06	0.000124175	8.55142e-05	SLC11A1/FOXP3/TFRC/PVR/IL4R/RIF1/CD40/RIPK2/LILRB1/TGFB1/IL23A/BCL6/CD274/IL1B/C3/NECTIN2/IL6/IL10/XCL1/NFKBIZ/FCER1G/IL6R/IL23R/NLRP3/ZC3H12A/IL7R/CCL19/CLCF1/IL27/CR1/HLA-C/TNF	32
GO:0002367	cytokine production involved in immune response	24/1786	95/18493	8.34516e-06	0.000167686	0.000115478	SLC11A1/FOXP3/IRAK3/LILRB1/TGFB1/BCL6/WNT5A/IL18RAP/NR4A3/IL1B/TICAM1/IL6/IL10/TLR2/SEMA7A/BCL10/XCL1/ANGPT1/HK1/FCER1G/NLRP3/NOD2/CD55/TNF	24
GO:0002699	positive regulation of immune effector process	40/1786	209/18493	1.96367e-05	0.00033354	0.000229695	GAB2/FOXP3/TFRC/PVR/IL4R/RIF1/CD40/STX4/RIPK2/LILRB1/GPI/TGFB1/IL23A/CD86/WNT5A/IL18RAP/NR4A3/IL1B/C3/ADGRE2/TICAM1/NECTIN2/RARA/IL6/SEMA7A/BCL10/XCL1/NFKBIZ/FER/HK1/FCER1G/IL23R/NLRP3/SYK/NOD2/CCL19/CLCF1/HLA-C/TNF/LYN	40
GO:0002262	myeloid cell homeostasis	31/1786	146/18493	2.06098e-05	0.00034608	0.00023833	KMT2E/FOXP3/PIK3CB/HIPK2/HIF1A/GPI/SLC11A2/TMEM14C/SMAP1/VEGFA/BCL6/ID2/ACVR2A/INHBA/ZFP36/AMPD3/ACVR1B/IL6/RB1/DYRK3/ADAM17/FCER1G/SFXN1/JAM3/STAT3/PTPN2/HCAR2/L3MBTL3/MPIG6B/MIR221/LYN	31
GO:0002718	regulation of cytokine production involved in immune response	20/1786	77/18493	2.9897e-05	0.000462501	0.000318505	FOXP3/IRAK3/LILRB1/TGFB1/BCL6/WNT5A/NR4A3/IL1B/TICAM1/IL6/IL10/SEMA7A/BCL10/XCL1/ANGPT1/HK1/FCER1G/NLRP3/NOD2/TNF	20
GO:0002768	immune response-regulating cell surface receptor signaling pathway	68/1786	445/18493	9.37693e-05	0.0011812	0.000813439	GAB2/STAP1/FOXP3/PIK3CB/TAB2/TXK/ACTB/PSEN1/LAT2/CD40/HCK/CD276/RIPK2/KCNN4/LILRB1/WASL/DUSP3/NFKB1/MAPK10/CR2/NR4A3/WIPF3/CCR7/NECTIN2/THEMIS2/MYO1G/BCL10/FCGR2A/NFKBIZ/MYO10/TNFRSF21/FCGR1A/DOCK1/FER/FCER1G/RUNX1/UBASH3A/SH2B2/ZC3H12A/PRKCD/SYK/CLEC4D/CRK/PTK2/FOS/FPR2/FPR1/C3AR1/PRNP/MUCL1/KLHL6/RELA/PTPN2/CD19/PAK2/MUC1/PLSCR1/SRC/C5AR1/MYO1C/FCGR1B/HLA-DRB5/CR1/NCKIPSD/NFAM1/LILRA2/LYN/IGHV5…	68
GO:0002683	negative regulation of immune system process	67/1786	437/18493	9.51315e-05	0.00119553	0.000823313	TSPAN6/STAP1/FOXP3/IL4R/CD59/IRAK3/TYRO3/NFKBIA/RIOK3/LILRB1/TGFB1/WASL/GLI3/DUSP3/ZBTB16/BCL6/CD86/HES1/ID2/PADI2/DUSP1/CD274/INHBA/SDC4/TICAM1/ZFP36/RARA/SELENOS/IL2RA/IL10/LRRC32/THBS1/BCL10/XCL1/ZC3H8/TNFRSF21/NOTCH1/FER/ANGPT1/FCER1G/RUNX1/UBASH3A/ZC3H12A/GPER1/HTRA1/CRK/CTNNB1/IL7R/CD14/SERPINB9/PRNP/CEBPB/TRIB1/PTPN2/SOCS1/CD55/HIST4H4/HES5/DLL1/CR1/LILRB3/MIR221/TNF/LILRA2/LYN/MMP12/CCL3	67
GO:0045088	regulation of innate immune response	58/1786	365/18493	0.000103082	0.00128178	0.000882711	TSPAN6/MARCO/TNIP3/TAB2/PVR/ALPK1/TXK/IRAK3/TYRO3/NFKBIA/HCK/RIOK3/RIPK2/LILRB1/NFKB1/UNC93B1/BIRC2/WNT5A/MAPKAPK3/IL18RAP/TICAM1/NECTIN2/IRAK2/FLOT1/TLR2/BCL10/S100A8/TNIP1/PIK3AP1/FCER1G/IFNGR2/S100A9/PRKCD/SYK/CLEC4D/HSP90B1/CRK/NOD2/CD14/SERPINB9/MUCL1/MYD88/RELA/TLR1/LEP/PTPN2/PAK2/IRAK1/SOCS3/SOCS1/MUC1/PLSCR1/PTPN1/SRC/CR1/LILRA2/LYN/MMP12	58
GO:0042088	T-helper 1 type immune response	12/1786	42/18493	0.000446525	0.00423803	0.00291855	SLC11A1/BCL3/IL4R/RIPK2/IL23A/IL18RAP/IL1B/XCL1/IL6R/IL23R/CCL19/IL27	12
GO:1900015	regulation of cytokine production involved in inflammatory response	11/1786	40/18493	0.00108868	0.00854419	0.00588402	MEFV/IL1R2/TICAM1/PDCD4/ZC3H12A/NOD2/MYD88/LEP/PER1/SIRPA/MIR221	11
GO:0002474	antigen processing and presentation of peptide antigen via MHC class I	12/1786	46/18493	0.00109276	0.0085648	0.00589821	SEC23A/SEC24A/CANX/ITGAV/SEC31A/FCGR1A/SEC24D/FCER1G/PDIA3/FCGR1B/HLA-C/IFI30	12
