# Supplementary material for: Inflammation and immune activation are associated with risk of Mycobacterium tuberculosis infection in BCG-vaccinated infants
Source: Research Square preprint supplement (doi:10.21203/rs.3.rs-1632594/v1), 2022-05-17
Supplement: Supplementary file 2 [file 0604cd758096dfd192b7e2fb.xlsx]

## Sheet: Supplementary Table 3
Supplementary Table 3: Univariate conditional logistic regression and AUC analysis results
Immune parameters	Assay	Flow marker	N	OR*	95% CI	P-value	B-H adjusted P-value^	AUROC
ELISpot BCG	ELISpot	-	139	0.99	0.97 to 1.01	0.238	0.597	0.45
ELISpot CMV	ELISpot	-	134	1	1.00 to 1.00	0.149	0.481	0.54
ELISpot EBV	ELISpot	-	130	0.98	0.93 to 1.04	0.572	0.871	0.5
ELISpot PPD	ELISpot	-	89	1	0.99 to 1.00	0.332	0.726	0.53
MGIA 1x10^6	MGIA	-	72	-	-	-	-	0.57
MGIA 3x10^6	MGIA	-	60	11.8	0.00 to 3252728	0.699	0.924	0.51
Ag85A IgG (D0)	ELISA	-	159	8.85	2.05 to 38.09	0.003	0.339	0.59
WCL IgG (D0)	ELISA	-	159	0.88	0.18 to 4.35	0.876	0.954	0.49
Ag85A IgG (D28)	ELISA	-	127	1.11	0.49 to 2.50	0.808	0.924	0.48
WCL IgG (D28)	ELISA	-	127	1.1	0.29 to 4.24	0.891	0.954	0.53
Lymphocytes	Flow Cytometry: T cell	CD3+	142	1.01	0.97 to 1.05	0.73	0.924	0.53
CD4 cells	Flow Cytometry: T cell	CD4+	142	0.99	0.96 to 1.02	0.566	0.871	0.45
Activated CD4	Flow Cytometry: T cell	CD4+HLA-DR+	142	1	0.95 to 1.06	0.921	0.964	0.49
Regulatory CD4	Flow Cytometry: T cell	CD4+CD25+CD127-	138	0.4	0.17 to 0.96	0.04	0.389	0.4
CD8 cells	Flow Cytometry: T cell	CD8+	142	1.01	0.98 to 1.04	0.644	0.898	0.55
Activated CD8	Flow Cytometry: T cell	CD8+HLA-DR+	142	1	0.98 to 1.03	0.807	0.924	0.52
Regulatory CD8	Flow Cytometry: T cell	CD8+CD25+CD127-	142	0.57	0.18 to 1.82	0.347	0.726	0.47
Non activated monocytes (suppressors)	Flow Cytometry: T cell	CD14+HLA-DR-	142	0.87	0.45 to 1.66	0.667	0.911	0.47
Activated monocytes	Flow Cytometry: T cell	CD14+HLA-DR+	142	1.01	0.98 to 1.05	0.51	0.842	0.54
Inflammatory monocytes	Flow Cytometry: T cell	CD14+CD16+	142	0.96	0.87 to 1.06	0.435	0.8	0.48
B cells	Flow Cytometry: T cell	CD19+	142	1.02	0.96 to 1.07	0.566	0.871	0.54
NK cells	Flow Cytometry: T cell	CD56+	142	1.01	0.94 to 1.09	0.773	0.924	0.49
Non CD3 NK cells	Flow Cytometry: T cell	CD56+CD3-	142	0.96	0.83 to 1.10	0.565	0.871	0.42
NKT cells	Flow Cytometry: T cell	CD56+CD3+	142	1.03	0.95 to 1.13	0.447	0.8	0.52
Bright NK cells CD16+	Flow Cytometry: T cell	CD56++CD16+	142	0.95	0.35 to 2.55	0.913	0.964	0.48
Bright NK cells CD16-	Flow Cytometry: T cell	CD56++CD16-	142	0.9	0.36 to 2.22	0.818	0.924	0.48
CD16+ NK cells	Flow Cytometry: T cell	CD56+CD16+	142	0.97	0.88 to 1.08	0.631	0.891	0.45
CD16- NK cells	Flow Cytometry: T cell	CD56+CD16-	142	0.91	0.70 to 1.19	0.514	0.842	0.41
CD4+CD26+	Flow Cytometry: MAIT cell	CD4+CD26+	87	0.91	0.83 to 1.00	0.042	0.389	0.36
CD4+CD27+	Flow Cytometry: MAIT cell	CD4+CD27+	87	0.93	0.85 to 1.02	0.11	0.414	0.37
CD4+CD161+	Flow Cytometry: MAIT cell	CD4+CD161+	87	1.16	0.86 to 1.57	0.321	0.726	0.61
CD4 MAITS	Flow Cytometry: MAIT cell	CD4+Va7.2+	87	0.86	0.31 to 2.41	0.772	0.924	0.48
CD4 MAITS CD27+	Flow Cytometry: MAIT cell	CD4+Va7.2+	87	0.7	0.17 to 2.88	0.62	0.887	0.44
CD4 MAITS CD26+	Flow Cytometry: MAIT cell	CD4+CD26+Va7.2+	87	0.55	0.11 to 2.85	0.477	0.817	0.44
CD4 MAITS CD161+	Flow Cytometry: MAIT cell	CD4+CD161+Va7.2+	87	3.24	0.05 to 222.5	0.586	0.871	0.53
CD8+CD26+	Flow Cytometry: MAIT cell	CD8+CD26+	87	0.99	0.97 to 1.01	0.386	0.752	0.4
CD8+CD27+	Flow Cytometry: MAIT cell	CD8+CD27+	87	0.99	0.96 to 1.01	0.38	0.752	0.4
CD8+CD161+	Flow Cytometry: MAIT cell	CD8+CD161+	87	0.89	0.71 to 1.12	0.324	0.726	0.49
CD8 MAITS	Flow Cytometry: MAIT cell	CD8+Va7.2+	87	1.08	0.92 to 1.26	0.367	0.747	0.5
CD8 MAITS CD27+	Flow Cytometry: MAIT cell	CD8+Va7.2+CD27+	87	0.93	0.70 to 1.24	0.611	0.887	0.41
CD8 MAITS CD26+	Flow Cytometry: MAIT cell	CD8+CD26+Va7.2+	87	0.9	0.71 to 1.14	0.398	0.762	0.4
CD8 MAITS CD161+	Flow Cytometry: MAIT cell	CD8+CD161+Va7.2+	87	1.05	0.50 to 2.21	0.895	0.954	0.53
CD163+ Monocytes (anti-Inflammatory)	Flow Cytometry: MAIT cell	CD14-CD163+	88	0.98	0.95 to 1.02	0.339	0.726	0.38
Transitional-Regulatory B cells	Flow Cytometry: B cell	CD24++CD38++	135	0.97	0.93 to 1.02	0.196	0.568	0.44
Plasmoblasts1	Flow Cytometry: B cell	CD27+CD38+	135	0.79	0.54 to 1.15	0.21	0.579	0.41
Plasmoblasts2	Flow Cytometry: B cell	CD38+CD24-	135	1	0.85 to 1.17	0.984	0.993	0.49
Plasmoblasts3	Flow Cytometry: B cell	IgD-CD27++	135	0.89	0.47 to 1.66	0.706	0.924	0.45
Immature B cells	Flow Cytometry: B cell	IgD-CD27-/CD24++CD38++	135	0.98	0.89 to 1.09	0.726	0.924	0.48
IgG+CD5+ B cells	Flow Cytometry: B cell	IgG+CD5+	135	0.93	0.77 to 1.12	0.427	0.8	0.48
Memory B cells	Flow Cytometry: B cell	IgD-CD27+	135	0.92	0.69 to 1.23	0.582	0.871	0.44
Naiive B cells	Flow Cytometry: B cell	IgD+CD27-	135	0.98	0.87 to 1.11	0.782	0.924	0.53
CD5+ B cells	Flow Cytometry: B cell	CD5+	135	0.99	0.95 to 1.04	0.785	0.924	0.48
CD24+ B cells	Flow Cytometry: B cell	CD24+	135	0.99	0.88 to 1.13	0.976	0.993	0.43
CD27+ B cells	Flow Cytometry: B cell	CD27+	135	0.97	0.78 to 1.21	0.781	0.924	0.45
CD38+ B cells	Flow Cytometry: B cell	CD38+	135	0.93	0.86 to 1.00	0.036	0.389	0.41
IgD+ B cells	Flow Cytometry: B cell	IgD+	135	0.98	0.87 to 1.12	0.812	0.924	0.52
IgG+ B cells	Flow Cytometry: B cell	IgG+	135	0.99	0.90 to 1.08	0.75	0.924	0.45
Inhibitory CD4 cells	Flow Cytometry: T cell	CD4+PD1+	142	1.03	0.95 to 1.12	0.493	0.831	0.55
Inhibitory CD8 cells	Flow Cytometry: T cell	CD8+PD1+	142	1.02	0.96 to 1.09	0.453	0.8	0.53
Monocytes	Flow Cytometry: T cell	CD14+	142	1	0.90 to 1.11	0.993	0.993	0.5
ML_Ratio	Flow Cytometry: T cell	ML_Ratio	142	0.65	0.04 to 11.05	0.765	0.924	0.49
Gamma delta cells	Flow Cytometry: T cell	CD3+CD4-CD8-	142	1.1	0.94 to 1.29	0.239	0.597	0.54
sCD40L (did not pass QC)	Multiplex	-
EGF	Multiplex	-	155	1.01	1.00 to 1.01	0.127	0.448	0.47
Eotaxin/CCL11	Multiplex	-	156	1	1.00 to 1.01	0.027	0.389	0.6
FGF-2	Multiplex	-	156	1	1.00 to 1.01	0.082	0.389	0.58
Flt-3 ligand (did not pass QC)	Multiplex	-
Fractalkine	Multiplex	-	155	1	1.00 to 1.00	0.083	0.389	0.56
G-CSF	Multiplex	-	156	1.01	1.00 to 1.01	0.025	0.389	0.6
GM-CSF	Multiplex	-	153	1.02	1.00 to 1.04	0.093	0.389	0.62
GRO	Multiplex	-	156	1	1.00 to 1.00	0.851	0.952	0.48
IFN-α2	Multiplex	-	150	1	1.00 to 1.01	0.063	0.389	0.58
IFN-γ	Multiplex	-	155	1.01	1.00 to 1.01	0.04	0.389	0.56
IL-1α (did not pass QC)	Multiplex	-
IL-1β	Multiplex	-	140	1.04	0.99 to 1.10	0.148	0.481	0.56
IL-1ra	Multiplex	-	156	1	1.00 to 1.01	0.082	0.389	0.58
IL-2	Multiplex	-	120	1.06	0.97 to 1.16	0.202	0.571	0.53
IL-3	Multiplex	-	41	2.59	0.70 to 9.62	0.156	0.49	0.66
IL-4	Multiplex	-	141	1	1.00 to 1.01	0.062	0.389	0.58
IL-5	Multiplex	-	139	1.03	1.00 to 1.06	0.087	0.389	0.63
IL-6	Multiplex	-	24	1.23	0.90 to 1.68	0.195	0.568	0.67
IL-7	Multiplex	-	102	1.04	1.00 to 1.09	0.052	0.389	0.59
IL-8	Multiplex	-	155	1.01	1.00 to 1.03	0.139	0.476	0.56
IL-9 (did not pass QC)	Multiplex	-
IL-10	Multiplex	-	122	1.02	1.00 to 1.04	0.093	0.389	0.58
IL-12 (p40)	Multiplex	-	60	1.01	0.99 to 1.03	0.448	0.8	0.56
IL-12 (p70)	Multiplex	-	137	1.01	1.00 to 1.02	0.115	0.419	0.5
IL-13	Multiplex	-	8	0.99	0.95 to 1.04	0.807	0.924	0.64
IL-15	Multiplex	-	89	1.03	0.98 to 1.09	0.272	0.654	0.56
IL-17A	Multiplex	-	155	1.01	1.00 to 1.02	0.107	0.414	0.52
IP-10	Multiplex	-	156	1	1.00 to 1.00	0.093	0.389	0.62
MCP-1	Multiplex	-	156	1	1.00 to 1.00	0.463	0.805	0.52
MCP-3	Multiplex	-	152	1	1.00 to 1.01	0.062	0.389	0.6
MDC (CCL22)	Multiplex	-	156	1	1.00 to 1.00	0.347	0.726	0.54
MIP-1α	Multiplex	-	93	1.04	0.99 to 1.08	0.091	0.389	0.58
MIP-1β	Multiplex	-	156	1.02	1.00 to 1.03	0.034	0.389	0.57
TGF-α	Multiplex	-	129	1	0.99 to 1.01	0.882	0.954	0.58
TNF-α	Multiplex	-	156	1.02	1.00 to 1.03	0.033	0.389	0.59
TNF-β	Multiplex	-	102	1.03	1.00 to 1.07	0.067	0.389	0.62
VEGF	Multiplex	-	152	1	1.00 to 1.00	0.025	0.389	0.55
CD3+CD161+	Flow Cytometry: MAIT cell	DUMP-CD3+/CD3+CD14-/CD161+	88	0.96	0.78 to 1.17	0.669	0.911	0.53
CD161+MAITS	Flow Cytometry: MAIT cell	DUMP-CD3+/CD3+CD14-/CD3+CD161+Va7.2+	88	0.98	0.16 to 5.81	0.981	0.993	0.52
CD3+CD26+	Flow Cytometry: MAIT cell	DUMP-CD3+/CD3+CD14-/CD161+	88	0.98	0.94 to 1.01	0.235	0.597	0.39
CD3+CD27+	Flow Cytometry: MAIT cell	DUMP-CD3+/CD3+CD14-/CD161+	88	0.98	0.94 to 1.02	0.243	0.597	0.39
CD3+ MAITS	Flow Cytometry: MAIT cell	DUMP-CD3+/CD3+CD14-/CD161+	88	1.08	0.72 to 1.62	0.7	0.924	0.51
Complement C1q	Multiplex	-	152	1	1.00 to 1.00	0.612	0.887	0.54
Complement C2	Multiplex	-	152	1	1.00 to 1.00	0.023	0.389	0.62
Complement C3	Multiplex	-	137	1	1.00 to 1.00	0.295	0.694	0.47
Complement C3b/iC3b	Multiplex	-	143	1	1.00 to 1.00	0.87	0.954	0.53
Complement C4	Multiplex	-	152	1	1.00 to 1.00	0.37	0.747	0.61
Complement C4b	Multiplex	-	152	1	1.00 to 1.00	0.011	0.389	0.61
Complement C5	Multiplex	-	152	1	1.00 to 1.00	0.076	0.389	0.54
Complement C5a	Multiplex	-	152	1	1.00 to 1.00	0.106	0.414	0.6
Complement C9	Multiplex	-	152	1	1.00 to 1.00	0.178	0.544	0.58
Complement Factor B	Multiplex	-	132	1	1.00 to 1.00	0.237	0.597	0.52
Complement factor D	Multiplex	-	152	1	1.00 to 1.00	0.981	0.993	0.52
Complement Factor I	Multiplex	-	152	1	1.00 to 1.00	0.071	0.389	0.59
MBL	Multiplex	-	152	1	1.00 to 1.00	0.553	0.871	0.52
*Estimated odds ratio from a conditional logistic regression model where the occurrence of M.tb infection is the outcome variable, with the matched case-control set number as the strata variable and the immune response as the independent variable
AUROC – area under the receiving operation characteristic
The conditional logistic regression model for MGIA 1x10^6 would not converge and hence there is no result for this assay
