# Supplementary material for: Inflammation and immune activation are associated with risk of Mycobacterium tuberculosis infection in BCG-vaccinated infants
Source: Research Square preprint supplement (doi:10.21203/rs.3.rs-1632594/v1), 2022-05-17
Supplement: Supplementary file 3 [file 0fd856608943593eb55b8b4a.xlsx]

## Sheet: Supplementary Table 7A
Supplementary 7A: The influence of timepoints of samples on immune parameters
Immune parameter	P-value	median(Day 28)/median(Day -7)	B-H adjusted p-value
IgG+ B cells	0.00513411	0.409986	0.183462
ELISpot BCG	0.00536451	0.185185	0.183462
ELISpot PPD	0.00593905	0.340136	0.183462
Complement Factor I	0.00807582	1.32062	0.183462
ML ratio	0.00849361	0.553809	0.183462
IgG+CD5+ B cells	0.0249512	0.527607	0.449121
Monocytes	0.0335572	0.668081	0.474976
Complement factor D	0.0478591	1.24373	0.474976
Activated CD4	0.0535105	0.738519	0.474976
CD38+ B cells	0.058101	0.9662	0.474976
Complement C1q	0.0678483	1.02681	0.474976
Non CD3 NK cells	0.069219	0.839481	0.474976
Transitional-Regulatory B cells	0.0707231	0.78937	0.474976
Complement C3b/iC3b	0.0741123	1.30563	0.474976
CD163+ Monocytes (anti-Inflammatory)	0.0748939	0.897564	0.474976
Bright NK cells CD16+	0.0766224	0.744898	0.474976
Bright NK cells CD16-	0.0769377	0.612903	0.474976
Lymphocytes	0.079686	1.14608	0.474976
CD3+ MAITS	0.0843484	0.77993	0.474976
Complement C5	0.0879585	1.49449	0.474976
MBL	0.0931113	1.8768	0.478858
MDC (CCL22)	0.116119	1.34634	0.570039
G-CSF	0.127957	1.65618	0.595233
CD8 MAITS CD27+	0.132274	0.589681	0.595233
CD8+CD27+	0.15926	0.848015	0.650439
Fractalkine	0.160064	1.33945	0.650439
CD8 MAITS CD26+	0.16261	0.770833	0.650439
MCP-3	0.184487	1.90056	0.711591
CD4 MAITS	0.202458	0.892405	0.75398
Naive B cells	0.217085	1.02784	0.781507
IgD+ B cells	0.237109	1.01763	0.783649
TGF-a	0.243213	2.44706	0.783649
CD8 MAITS	0.253532	0.68873	0.783649
IL-2	0.266832	1.15791	0.783649
CD16- NK cells	0.267179	0.905149	0.783649
Inhibitory CD4 cells	0.267179	0.772727	0.783649
Complement C3	0.286689	0.742881	0.783649
IL-7	0.290599	0.666621	0.783649
Plasmoblasts2	0.297113	0.776471	0.783649
CD8+CD26+	0.307354	0.825503	0.783649
TNF-a	0.308268	1.19829	0.783649
Complement C9	0.309481	1	0.783649
Complement C4b	0.312009	1.32342	0.783649
CD4 MAITS CD26+	0.33881	0.916667	0.826664
MGIA 1x10^6	0.344443	0.980898	0.826664
CD4 MAITS CD161+	0.366471	0.90625	0.839493
TNF-b	0.367629	0.432496	0.839493
CD4 MAITS CD27+	0.380881	0.922297	0.839493
CD3+CD161+	0.380881	0.891892	0.839493
IL-8	0.389725	1.10362	0.841806
CD161+MAITS	0.425393	0.698113	0.881802
Complement C2	0.425646	1.27464	0.881802
Complement C5a	0.434767	0.96422	0.881802
NKT cells	0.44577	1.24113	0.881802
IL-4	0.449066	1.40405	0.881802
Plasmoblasts3	0.465418	1.55952	0.885117
CD3+CD27+	0.473404	0.923852	0.885117
Activated CD8	0.475341	0.929487	0.885117
CD3+CD26+	0.50679	0.93808	0.897483
VEGF	0.50808	1.78944	0.897483
IL-1ra	0.508191	1.03384	0.897483
IL-5	0.515222	1.42624	0.897483
Complement C4	0.52534	1.03862	0.900583
NK cells	0.548265	1.16763	0.925198
CD8 cells	0.559176	1.12897	0.929092
CD4+CD161+	0.595367	0.996503	0.958275
IL-3	0.604382	1.05114	0.958275
GRO	0.609646	1.06028	0.958275
IL-12 (p70)	0.612231	0.999879	0.958275
CD27+ B cells	0.638934	0.784553	0.98569
MIP-1b	0.662237	0.973078	0.98569
Inflammatory monocytes	0.673152	1.14706	0.98569
GM-CSF	0.681403	0.897649	0.98569
Plasmoblasts1	0.689351	0.821782	0.98569
IFN-a2	0.700833	1	0.98569
IL-15	0.70637	0.769039	0.98569
CD24+ B cells	0.727923	1.00053	0.98569
ELISpot CMV	0.728861	2.33333	0.98569
CD8 MAITS CD161+	0.729945	0.652941	0.98569
ELISpot EBV	0.735285	0	0.98569
IL-17A	0.740731	0.849966	0.98569
Complement Factor B	0.748394	1.1224	0.98569
CD16+ NK cells	0.761241	0.97993	0.990319
B cells	0.770248	0.986381	0.990319
Gamma delta cells	0.785742	0.942231	0.991357
CD4+CD26+	0.790502	0.977483	0.991357
Eotaxin/CCL11	0.803705	1.12438	0.991357
CD5+ B cells	0.807772	1.0125	0.991357
Activated monocytes	0.832936	1.02297	1
Regulatory CD4	0.853549	0.922619	1
CD4+CD27+	0.855653	0.984737	1
CD8+CD161+	0.855653	1.31129	1
IFN-g	0.89469	0.805337	1
MIP-1a	0.894706	1.13352	1
Memory B cells	0.90462	0.916667	1
IP-10	0.906294	1.04463	1
Inhibitory CD8 cells	0.910901	1.04099	1
Immature B cells	0.916954	0.869725	1
IL-1b	0.921009	1.09062	1
IL-10	0.927144	0.904442	1
MCP-1	0.94786	1.14381	1
EGF	0.968334	1.03575	1
Non activated monocytes (suppressors)	0.974113	1.05328	1
IL-12 (p40)	0.979272	1.25313	1
FGF-2	0.989438	0.962604	1
MGIA 3x10^6	1	1.00026	1
CD4 cells	1	1.01045	1
Regulatory CD8	1	1.07927	1

## Sheet: Supplementary Table 7B
Supplementary Table 7B: The influence of the timepoints of samples on the results of conditional logistic regression.
Immune parameter	OR: Day -7 samples only	OR: All samples	P-value: Day -7 samples only	P-value: All samples	OR: All samples / OR: Day -7 samples only
ELISpot BCG	0.951328	0.752063	0.860462	0.23844	0.79054
ELISpot CMV	1.19386	1.28845	0.409593	0.149386	1.07923
ELISpot EBV	0.418583	0.485864	0.60815	0.572198	1.16073
ELISpot PPD	0.870373	0.745324	0.657566	0.3319	0.856327
MGIA 1x10^6	2.01822	1.83806	0.0931913	0.125565	0.910729
MGIA 3x10^6	1.2303	1.13117	0.519391	0.699382	0.919423
Lymphocytes	1.04147	1.07124	0.87142	0.729767	1.02858
CD4 cells	0.968448	0.893879	0.895981	0.566142	0.923002
Activated CD4	1.31269	1.02117	0.298075	0.921425	0.777925
Regulatory CD4	0.564158	0.567439	0.1161	0.0401892	1.00582
CD8 cells	1.01128	1.0943	0.963685	0.643818	1.08209
Activated CD8	1.14223	1.04793	0.576612	0.807052	0.917444
Regulatory CD8	0.912877	0.808123	0.738794	0.346537	0.885248
Non activated monocytes (suppressors)	1.0274	0.912487	0.914537	0.66697	0.888148
Activated monocytes	1.03062	1.15402	0.913091	0.509638	1.11973
Inflammatory monocytes	0.644171	0.846672	0.13864	0.435353	1.31436
B cells	1.12223	1.12205	0.652804	0.565875	0.999832
NK cells	1.0022	1.0665	0.993664	0.773047	1.06416
Non CD3 NK cells	0.754849	0.875284	0.331968	0.565029	1.15955
NKT cells	1.18389	1.16847	0.514995	0.447246	0.986975
Bright NK cells CD16+	1.09187	0.978687	0.715227	0.913399	0.896342
Bright NK cells CD16-	1.12837	0.957637	0.596165	0.818476	0.848694
CD16+ NK cells	0.736626	0.905896	0.259854	0.631493	1.22979
CD16- NK cells	1.10574	0.83533	0.753335	0.513517	0.75545
Inhibitory CD4 cells	1.1059	1.14013	0.667475	0.492961	1.03095
Inhibitory CD8 cells	1.2718	1.15245	0.299514	0.45348	0.906153
Monocytes	1.02695	0.998076	0.914839	0.99269	0.971887
ML ratio	0.925619	0.939247	0.762408	0.765312	1.01472
Gamma delta cells	1.19085	1.24155	0.473071	0.2394	1.04257
CD4+CD26+	0.540779	0.59492	0.0875993	0.0416051	1.10012
CD4+CD27+	0.656126	0.670116	0.176891	0.109671	1.02132
CD4+CD161+	1.23483	1.26198	0.440845	0.320816	1.02199
CD4 MAITS	1.09799	0.921491	0.736276	0.771569	0.839251
CD4 MAITS CD27+	1.15667	0.874561	0.641918	0.619859	0.756105
CD4 MAITS CD26+	1.07558	0.820748	0.815103	0.476654	0.763072
CD4 MAITS CD161+	1.62677	1.18528	0.255999	0.585532	0.72861
CD8+CD26+	0.840336	0.802923	0.55394	0.386472	0.955479
CD8+CD27+	0.905584	0.813672	0.713727	0.380286	0.898505
CD8+CD161+	0.717304	0.690073	0.429603	0.324427	0.962037
CD8 MAITS	1.24342	1.22474	0.388864	0.366751	0.984976
CD8 MAITS CD27+	0.980834	0.881119	0.945153	0.611371	0.898336
CD8 MAITS CD26+	0.913884	0.804249	0.747795	0.398402	0.880034
CD8 MAITS CD161+	0.975148	1.04004	0.93978	0.894799	1.06655
CD163+ Monocytes (anti-Inflammatory)	0.896935	0.775466	0.72639	0.338548	0.864574
CD3+CD161+	1.00961	0.888362	0.976481	0.668874	0.879909
CD161+MAITS	1.08335	0.992675	0.825057	0.980948	0.9163
CD3+CD26+	0.79771	0.726465	0.466686	0.234527	0.910688
CD3+CD27+	0.836739	0.744718	0.53999	0.242635	0.890025
CD3+ MAITS	1.12035	1.09231	0.658235	0.699581	0.974976
Transitional-Regulatory B cells	0.962617	0.767915	0.886295	0.195503	0.797737
Plasmoblasts1	0.659654	0.611478	0.370433	0.209651	0.926968
Plasmoblasts2	0.95012	0.995895	0.851279	0.98413	1.04818
Plasmoblasts3	0.823098	0.822292	0.735935	0.706282	0.999021
Immature B cells	1.28631	0.929535	0.301072	0.726289	0.722636
IgG+CD5+ B cells	0.935597	0.778462	0.871517	0.427302	0.832048
Memory B cells	0.764402	0.837957	0.486237	0.581716	1.09623
Naive B cells	0.953919	0.936029	0.870538	0.782468	0.981246
CD5+ B cells	1.19145	0.922922	0.588855	0.784869	0.77462
CD24+ B cells	1.14027	0.99295	0.67009	0.976193	0.870806
CD27+ B cells	0.965076	0.925934	0.911744	0.781061	0.959442
CD38+ B cells	0.76421	0.645894	0.292393	0.0361139	0.845179
IgD+ B cells	1.01891	0.943784	0.950192	0.812497	0.926269
IgG+ B cells	1.05836	0.932079	0.813418	0.750417	0.880679
EGF	1.59774	1.38319	0.14965	0.126529	0.865716
Eotaxin/CCL11	1.52655	1.46835	0.0643013	0.0268243	0.961876
FGF-2	1.98344	2.58514	0.21558	0.0819425	1.30336
Fractalkine	1.78312	2.00136	0.149721	0.08285	1.12239
G-CSF	1.20739	1.47658	0.375364	0.0250324	1.22295
GM-CSF	4.0682	6.02895	0.602123	0.09257	1.48197
GRO	0.878934	0.965672	0.617244	0.85128	1.09869
IFN-a2	1.75931	2.07013	0.183301	0.0625784	1.17667
IFN-g	1.5737	1.84963	0.109776	0.0401872	1.17534
IL-1b	2.20017	3.81188	0.350841	0.147961	1.73254
IL-1ra	2.0346	5.73751	0.269552	0.0815057	2.81997
IL-2	1.93084	2.93797	0.234691	0.202132	1.5216
IL-3	2.14517	2.82966	0.257119	0.155649	1.31909
IL-4	1.4877	1.47201	0.110194	0.062221	0.989451
IL-5	1.23594	1.39495	0.336011	0.0871758	1.12866
IL-7	1.37322	1.6021	0.244502	0.0523676	1.16668
IL-8	1.47199	1.52118	0.201968	0.139151	1.03342
IL-10	1.21169	1.40529	0.473138	0.0932584	1.15978
IL-12 (p40)	5.41416	15.0192	0.744022	0.447676	2.77406
IL-12 (p70)	1.69427	2.5637	0.335189	0.115206	1.51316
IL-15	2.52009	4.26539	0.341142	0.271998	1.69256
IL-17A	1.45544	1.44908	0.171537	0.107313	0.995629
IP-10	1.26107	1.3586	0.27934	0.093247	1.07734
MCP-1	1.17141	1.15327	0.537315	0.463181	0.984512
MCP-3	1.62188	2.16759	0.132143	0.0617151	1.33646
MDC (CCL22)	1.03178	1.1962	0.901151	0.346505	1.15935
MIP-1a	1.75898	2.10357	0.239056	0.0905747	1.19591
MIP-1b	1.63246	1.80587	0.13521	0.0342182	1.10622
TGF-a	0.54782	1.02874	0.581005	0.882336	1.87788
TNF-a	1.33514	1.56614	0.194578	0.0334625	1.17302
TNF-b	11.4598	44.9441	0.568632	0.0665089	3.92189
VEGF	1.42869	1.59785	0.118943	0.0247548	1.1184
Complement C1q	0.72866	1.11693	0.211419	0.61194	1.53285
Complement C2	1.22911	1.48414	0.342023	0.0226059	1.20749
Complement C3	0.737794	0.518593	0.564872	0.294589	0.702897
Complement C3b/iC3b	0.830933	0.969177	0.478079	0.869546	1.16637
Complement C4	1.141	1.16996	0.590449	0.369873	1.02539
Complement C4b	1.45788	1.76351	0.165457	0.010888	1.20964
Complement C5	1.16241	1.48478	0.629765	0.0763399	1.27733
Complement C5a	1.17889	1.41119	0.551592	0.106401	1.19705
Complement C9	0.992679	1.36522	0.979006	0.177545	1.37529
Complement Factor B	1.37785	1.25505	0.171702	0.236413	0.910873
Complement factor D	0.774974	1.00463	0.342509	0.980781	1.29634
Complement Factor I	0.898481	1.39112	0.669471	0.0708087	1.5483
MBL	0.907601	1.11582	0.717358	0.552696	1.22942
