# Supplementary material for: Inflammation and immune activation are associated with risk of Mycobacterium tuberculosis infection in BCG-vaccinated infants
Source: Research Square preprint supplement (doi:10.21203/rs.3.rs-1632594/v1), 2022-05-17
Supplement: Supplementary file 4 [file 83d19f90b26765e91066dda2.xlsx]

## Sheet: Supplementary Table 8A
Supplementary table 8A: Differentially expressed genes between M.tb-infected vs M.tb-uninfected infants among all infants
ensembl	baseMean	log2FoldChange	lfcSE	stat	pvalue	padj	hgnc_symbol
ENSG00000234665	7.97364	1.5161	0.461303	3.28657	0.00101415	0.0687124
ENSG00000225523	17.2016	1.12988	0.268225	4.21243	2.52633e-05	0.00973144	IGKV6D-21
ENSG00000253755	51.8672	1.11044	0.239599	4.63459	3.57645e-06	0.00531019	IGHGP
ENSG00000235559	8.41831	1.04985	0.29681	3.53711	0.000404526	0.0428086	NOP56P1
ENSG00000239975	14.0832	1.04129	0.34155	3.04872	0.00229822	0.097497	IGKV1D-33
ENSG00000251039	14.776	1.02937	0.270318	3.80802	0.000140085	0.0226725	IGKV2D-40
ENSG00000211639	49.5647	1.00156	0.249649	4.01187	6.02389e-05	0.0163475	IGLV4-60
ENSG00000251546	44.371	0.991647	0.32357	3.0647	0.00217887	0.0953533	IGKV1D-39
ENSG00000223648	47.9273	0.964862	0.167337	5.76599	8.11778e-09	0.000156348	IGHV3-64
ENSG00000204001	30.0177	0.946688	0.37839	2.50188	0.0123534	0.192308	LCN8
ENSG00000211935	199.866	0.93343	0.211449	4.41444	1.0127e-05	0.00696595	IGHV1-3
ENSG00000161133	33.6185	0.930497	0.318203	2.92422	0.0034532	0.116477	USP41
ENSG00000211891	9.0383	0.902642	0.282842	3.19133	0.00141621	0.0817237	IGHE
ENSG00000089199	20.151	0.863991	0.268491	3.21795	0.0012911	0.0773481	CHGB
ENSG00000237510	30.3393	0.844308	0.184609	4.57349	4.79664e-06	0.00556242	GPAT2P1
ENSG00000178965	10.1213	0.82847	0.197049	4.20438	2.61802e-05	0.00988688	ERICH3
ENSG00000276775	102.194	0.818107	0.304305	2.68844	0.00717862	0.156275	IGHV4-4
ENSG00000198963	7.95847	0.803266	0.279181	2.87723	0.00401189	0.125679	RORB
ENSG00000115155	72.0205	0.793043	0.293636	2.70077	0.00691799	0.155466	OTOF
ENSG00000225107	33.1581	0.786748	0.232383	3.38557	0.000710315	0.0584401
ENSG00000181374	85.166	0.785929	0.280848	2.79841	0.00513543	0.138357	CCL13
ENSG00000132465	2108.15	0.766373	0.155899	4.91581	8.84147e-07	0.00331382	JCHAIN
ENSG00000211669	82.3882	0.764935	0.252721	3.02679	0.00247162	0.100448	IGLV3-10
ENSG00000165949	287.419	0.757002	0.294054	2.57436	0.0100425	0.17843	IFI27
ENSG00000211652	57.8969	0.748395	0.167745	4.46151	8.13843e-06	0.0060287	IGLV7-43
ENSG00000236044	9.26495	0.745871	0.271657	2.74563	0.00603941	0.147138	FABP5P2
ENSG00000211964	259.292	0.740355	0.190891	3.87842	0.000105137	0.0190263	IGHV3-48
ENSG00000240864	126.041	0.734552	0.163186	4.50132	6.75321e-06	0.00597685	IGKV1-16
ENSG00000211968	27.492	0.734264	0.186778	3.93121	8.45192e-05	0.0190263	IGHV1-58
ENSG00000211611	30.158	0.732205	0.224522	3.26117	0.00110954	0.0714707	IGKV6-21
ENSG00000239571	104.702	0.724325	0.211454	3.42544	0.0006138	0.0533519	IGKV2D-30
ENSG00000237541	490.883	0.714887	0.261677	2.73194	0.0062962	0.150502	HLA-DQA2
ENSG00000124875	194.524	0.711705	0.225155	3.16096	0.00157251	0.0857155	CXCL6
ENSG00000253239	12.4396	0.711381	0.269845	2.63626	0.00838257	0.166205	IGLVI-70
ENSG00000188282	18.7471	0.708869	0.259213	2.7347	0.00624377	0.150131	RUFY4
ENSG00000211892	166.611	0.702519	0.189147	3.71415	0.00020389	0.0293055	IGHG4
ENSG00000211972	34.1306	0.701671	0.203172	3.45359	0.000553179	0.0517196	IGHV3-66
ENSG00000105492	13.8339	0.69347	0.164483	4.21607	2.48597e-05	0.00973144	SIGLEC6
ENSG00000146530	10.7404	0.684188	0.248822	2.74971	0.00596479	0.146346	VWDE
ENSG00000211642	82.7317	0.682276	0.205315	3.32307	0.000890324	0.0628119	IGLV10-54
ENSG00000211895	4562.8	0.671997	0.158561	4.23811	2.25408e-05	0.00930108	IGHA1
ENSG00000211896	5151.4	0.668138	0.181401	3.6832	0.000230321	0.0319135	IGHG1
ENSG00000144115	19.229	0.665178	0.258872	2.56952	0.0101838	0.17913	THNSL2
ENSG00000211670	33.7173	0.660392	0.257599	2.56365	0.0103579	0.179613	IGLV3-9
ENSG00000211685	48.3691	0.659012	0.183708	3.58727	0.000334153	0.0383082	IGLC7
ENSG00000224607	23.8005	0.647986	0.224481	2.88659	0.00389435	0.123823	IGKV1D-27
ENSG00000185745	1282.26	0.646365	0.241853	2.67255	0.0075277	0.160018	IFIT1
ENSG00000259479	71.2906	0.639637	0.15098	4.23656	2.26973e-05	0.00930108	SORD2P
ENSG00000168062	38.7353	0.631806	0.23234	2.71931	0.00654174	0.153464	BATF2
ENSG00000182963	7.32919	0.627476	0.135996	4.61392	3.9515e-06	0.00543614	GJC1
ENSG00000211662	396.616	0.625878	0.159358	3.92751	8.58305e-05	0.0190263	IGLV3-21
ENSG00000232216	65.0528	0.621696	0.201125	3.09109	0.0019942	0.0919591	IGHV3-43
ENSG00000154277	62.0783	0.611438	0.133903	4.56628	4.96459e-06	0.00556242	UCHL1
ENSG00000136848	16.2707	0.610769	0.238632	2.55946	0.0104836	0.181027	DAB2IP
ENSG00000187510	22.1371	0.610752	0.171476	3.56173	0.000368421	0.0400892	PLEKHG7
ENSG00000211679	1223.21	0.61024	0.119352	5.11294	3.17185e-07	0.00279632	IGLC3
ENSG00000169116	25.9779	0.606818	0.130865	4.63696	3.53563e-06	0.00531019	PARM1
ENSG00000186281	80.4299	0.606718	0.138824	4.37042	1.24006e-05	0.00723742	GPAT2
ENSG00000196167	10.8672	0.606352	0.206766	2.93255	0.00336188	0.115639	COLCA1
ENSG00000154319	81.3675	0.604809	0.1238	4.88537	1.03234e-06	0.00331382	FAM167A
ENSG00000211658	57.6058	0.595141	0.229919	2.58848	0.00964011	0.175411	IGLV3-27
ENSG00000211660	306.767	0.594841	0.137005	4.34175	1.41352e-05	0.00727069	IGLV2-23
ENSG00000222037	23.4728	0.591821	0.17352	3.41068	0.000648008	0.0549808	IGLC6
ENSG00000197582	46.1446	0.587871	0.180007	3.26583	0.00109143	0.0712572	GPX1P1
ENSG00000211941	195.822	0.587123	0.133974	4.38237	1.17397e-05	0.00723742	IGHV3-11
ENSG00000211668	254.557	0.585653	0.144223	4.06073	4.89187e-05	0.0157427	IGLV2-11
ENSG00000211947	429.245	0.576172	0.11757	4.90068	9.55043e-07	0.00331382	IGHV3-21
ENSG00000211753	194.719	0.570176	0.211199	2.69971	0.00693999	0.155466	TRBV28
ENSG00000243264	53.6277	0.567375	0.218359	2.59836	0.0093671	0.174685	IGKV2D-29
ENSG00000243238	194.875	0.564186	0.148014	3.81171	0.000138008	0.0226585	IGKV2-30
ENSG00000177294	23.0767	0.56367	0.199092	2.8312	0.00463732	0.132409	FBXO39
ENSG00000225698	27.8408	0.563644	0.194597	2.89647	0.00377388	0.122246	IGHV3-72
ENSG00000211651	373.563	0.557045	0.139589	3.99061	6.59033e-05	0.0171947	IGLV1-44
ENSG00000211673	384.186	0.554209	0.164074	3.37781	0.000730663	0.0584401	IGLV3-1
ENSG00000242371	556.574	0.55224	0.168125	3.2847	0.0010209	0.0687124	IGKV1-39
ENSG00000211959	353.303	0.551524	0.167236	3.29789	0.000974153	0.067248	IGHV4-39
ENSG00000242076	294.294	0.551289	0.123904	4.44932	8.61408e-06	0.00614471	IGKV1-33
ENSG00000211665	15.2697	0.547922	0.191701	2.85821	0.00426039	0.127613	IGLV3-16
ENSG00000117115	48.4071	0.545574	0.19657	2.77547	0.00551213	0.141659	PADI2
ENSG00000163563	333.916	0.542979	0.205146	2.64679	0.00812598	0.164064	MNDA
ENSG00000119922	1330.06	0.542886	0.17545	3.09425	0.00197313	0.0919591	IFIT2
ENSG00000241351	484.045	0.542629	0.115378	4.70305	2.563e-06	0.00531019	IGKV3-11
ENSG00000070915	16.47	0.539026	0.157151	3.42998	0.000603636	0.0533519	SLC12A3
ENSG00000189233	39.5682	0.535997	0.122533	4.3743	1.21822e-05	0.00723742	NUGGC
ENSG00000163666	10.4876	0.528683	0.214247	2.46763	0.0136011	0.196247	HESX1
ENSG00000278196	71.866	0.528598	0.15338	3.44633	0.000568262	0.0523671	IGLV2-8
ENSG00000137198	32.8701	0.527393	0.188526	2.79746	0.00515068	0.138357	GMPR
ENSG00000239855	34.3836	0.526201	0.195949	2.6854	0.00724436	0.156389	IGKV1-6
ENSG00000223350	71.7877	0.525283	0.167002	3.14537	0.00165876	0.0872888	IGLV9-49
ENSG00000127951	600.046	0.522044	0.177096	2.94781	0.00320037	0.11354	FGL2
ENSG00000112276	7.41412	0.51498	0.185396	2.77773	0.00547399	0.141622	BVES
ENSG00000048462	37.7526	0.514656	0.118625	4.33851	1.43451e-05	0.00727069	TNFRSF17
ENSG00000239951	792.889	0.513488	0.12269	4.18523	2.84872e-05	0.0105512	IGKV3-20
ENSG00000130702	188.109	0.510811	0.130666	3.9093	9.25637e-05	0.0190263	LAMA5
ENSG00000163568	110.173	0.510579	0.1261	4.049	5.14377e-05	0.0157427	AIM2
ENSG00000266017	7.37638	0.510178	0.170731	2.9882	0.00280623	0.106745	MIR4477B
ENSG00000226751	7.85935	0.508334	0.183056	2.77694	0.00548739	0.141622
ENSG00000111732	28.4634	0.506917	0.147956	3.42614	0.000612227	0.0533519	AICDA
ENSG00000162849	47.1254	0.505387	0.117434	4.30359	1.68049e-05	0.0078942	KIF26B
ENSG00000267383	16.5681	0.504716	0.149555	3.37479	0.000738711	0.0584401
ENSG00000163739	9022.48	0.50212	0.202505	2.47954	0.0131553	0.194936	CXCL1
ENSG00000058866	19.2955	0.501973	0.129406	3.87905	0.000104864	0.0190263	DGKG
ENSG00000211650	79.6583	0.500915	0.188064	2.66353	0.00773244	0.160797	IGLV5-45
ENSG00000102174	15.7892	0.491365	0.156192	3.1459	0.00165578	0.0872888	PHEX
ENSG00000280079	17.3875	0.491041	0.16117	3.04673	0.00231347	0.0977136
ENSG00000215218	9.02347	0.490679	0.158697	3.09193	0.00198858	0.0919591	UBE2QL1
ENSG00000211666	598.081	0.487515	0.125492	3.88484	0.000102399	0.0190263	IGLV2-14
ENSG00000211966	430.536	0.487078	0.121412	4.01178	6.02636e-05	0.0163475	IGHV5-51
ENSG00000272595	187.102	0.485278	0.189717	2.5579	0.0105307	0.18109	OR10AH1P
ENSG00000134901	24.4588	0.482564	0.144351	3.34299	0.000828821	0.0608338	KDELC1
ENSG00000121807	93.3066	0.482504	0.187029	2.57983	0.0098848	0.177099	CCR2
ENSG00000180535	9.39416	0.480111	0.182258	2.63425	0.00843242	0.166227	BHLHA15
ENSG00000211649	69.3557	0.478423	0.17964	2.66324	0.0077393	0.160797	IGLV7-46
ENSG00000285972	10.5202	0.47392	0.187111	2.53283	0.0113146	0.186925	CERNA2
ENSG00000225964	172.444	0.4715	0.187608	2.51322	0.0119634	0.190504	NRIR
ENSG00000244116	218.653	0.470885	0.161925	2.90804	0.00363702	0.119537	IGKV2-28
ENSG00000071282	12.3236	0.469627	0.143268	3.27796	0.00104559	0.0692027	LMCD1
ENSG00000211592	7939.16	0.469414	0.113882	4.12194	3.75689e-05	0.0133996	IGKC
ENSG00000211949	809.945	0.468843	0.116812	4.01365	5.97879e-05	0.0163475	IGHV3-23
ENSG00000128268	111.589	0.467329	0.110294	4.23713	2.26399e-05	0.00930108	MGAT3
ENSG00000124613	54.0075	0.464923	0.174248	2.66816	0.00762671	0.160642	ZNF391
ENSG00000244437	437.113	0.464703	0.136397	3.407	0.000656803	0.0554826	IGKV3-15
ENSG00000211648	320.254	0.464403	0.147644	3.14542	0.00165848	0.0872888	IGLV1-47
ENSG00000171766	80.7952	0.461027	0.127678	3.61086	0.000305185	0.0369205	GATM
ENSG00000275410	46.27	0.46097	0.126046	3.65715	0.000255036	0.0341111	HNF1B
ENSG00000125869	16.4734	0.460232	0.164707	2.79426	0.00520191	0.139345	LAMP5
ENSG00000236213	13.1679	0.45703	0.172357	2.65165	0.00800994	0.16356
ENSG00000177494	157.042	0.455819	0.098361	4.63414	3.58424e-06	0.00531019	ZBED2
ENSG00000253234	11.6293	0.454461	0.146666	3.0986	0.00194434	0.0918603	IGLV2-5
ENSG00000224373	567.349	0.449497	0.112859	3.98282	6.81025e-05	0.0173069	IGHV4-59
ENSG00000256590	35.0959	0.443318	0.131058	3.38262	0.00071799	0.0584401	TRDV3
ENSG00000180549	23.4868	0.439563	0.135004	3.25593	0.00113021	0.071587	FUT7
ENSG00000211663	329.579	0.433363	0.157106	2.75841	0.00580842	0.143792	IGLV3-19
ENSG00000175920	8.68577	0.429724	0.131865	3.25882	0.00111876	0.0714937	DOK7
ENSG00000277423	7.27086	0.429551	0.125541	3.4216	0.000622549	0.0537681
ENSG00000211599	51.0289	0.42753	0.164588	2.59757	0.00938864	0.174685	IGKV5-2
ENSG00000158481	86.7871	0.426831	0.13291	3.21143	0.00132077	0.0786542	CD1C
ENSG00000184524	10.6888	0.426373	0.1115	3.82398	0.000131316	0.0220046	CEND1
ENSG00000211677	2033.27	0.425159	0.12631	3.36599	0.000762699	0.0587583	IGLC2
ENSG00000238062	25.1285	0.424335	0.139467	3.04254	0.00234594	0.0980346	SPATA3-AS1
ENSG00000173801	683.979	0.423084	0.109396	3.86746	0.000109974	0.0194322	JUP
ENSG00000170476	463.048	0.419974	0.109166	3.84712	0.000119515	0.0209261	MZB1
ENSG00000228590	30.3877	0.416552	0.129148	3.2254	0.00125799	0.0766214
ENSG00000211965	142.108	0.416079	0.146255	2.84489	0.00444273	0.129844	IGHV3-49
ENSG00000251301	95.3152	0.414805	0.142161	2.91786	0.00352448	0.117082	LINC02384
ENSG00000243466	479.085	0.410146	0.129747	3.16113	0.00157159	0.0857155	IGKV1-5
ENSG00000211943	305.384	0.408726	0.131146	3.11657	0.00182966	0.0905915	IGHV3-15
ENSG00000162545	26.0243	0.40866	0.109149	3.74405	0.00018108	0.0274614	CAMK2N1
ENSG00000211598	541.775	0.407392	0.139124	2.92826	0.00340869	0.116197	IGKV4-1
ENSG00000126231	23.943	0.406615	0.150246	2.70633	0.00680315	0.155174	PROZ
ENSG00000270972	10.6466	0.402328	0.156475	2.57119	0.0101348	0.179024
ENSG00000211637	137.315	0.402091	0.161093	2.49602	0.0125596	0.193323	IGLV4-69
ENSG00000285413	61.2993	0.401888	0.127627	3.14892	0.00163873	0.0872888
ENSG00000230709	38.9871	0.400645	0.146019	2.74378	0.00607353	0.147498
ENSG00000235621	88.9473	0.399492	0.111913	3.56967	0.000357436	0.0395644	LINC00494
ENSG00000211644	329.55	0.399485	0.116303	3.43485	0.000592888	0.0533519	IGLV1-51
ENSG00000165449	23.3846	0.399074	0.16071	2.4832	0.0130207	0.194913	SLC16A9
ENSG00000211962	183.476	0.397121	0.131406	3.02209	0.00251034	0.100819	IGHV1-46
ENSG00000178445	36.3175	0.396566	0.127236	3.11677	0.00182845	0.0905915	GLDC
ENSG00000182240	29.9155	0.396308	0.118623	3.34091	0.000835057	0.0608338	BACE2
ENSG00000011590	78.8125	0.395282	0.114506	3.45207	0.000556294	0.0517595	ZBTB32
ENSG00000174171	177.984	0.394505	0.146889	2.68574	0.0072369	0.156389
ENSG00000155093	37.9459	0.393855	0.0994185	3.96159	7.44526e-05	0.0183841	PTPRN2
ENSG00000243290	124.836	0.393337	0.140731	2.79495	0.00519084	0.139242	IGKV1-12
ENSG00000255993	7.28215	0.390834	0.145518	2.68581	0.00723535	0.156389	PSMC1P9
ENSG00000088340	17.2807	0.389564	0.138694	2.80881	0.00497243	0.137011	FER1L4
ENSG00000224650	179.599	0.389084	0.144659	2.68967	0.00715233	0.156184	IGHV3-74
ENSG00000188676	27.8517	0.388552	0.141253	2.75076	0.00594575	0.146223	IDO2
ENSG00000039068	107.251	0.387962	0.15358	2.52613	0.0115327	0.188192	CDH1
ENSG00000121570	180.778	0.381635	0.0997095	3.82747	0.000129469	0.0220046	DPPA4
ENSG00000211659	305.721	0.381431	0.153904	2.47838	0.0131982	0.194936	IGLV3-25
ENSG00000166428	199.95	0.376982	0.0972329	3.87711	0.000105706	0.0190263	PLD4
ENSG00000081377	48.7479	0.374666	0.11736	3.19245	0.00141072	0.0817237	CDC14B
ENSG00000211897	1465.11	0.374647	0.136563	2.7434	0.00608064	0.147498	IGHG3
ENSG00000204789	59.7533	0.374189	0.150797	2.4814	0.0130867	0.194933	ZNF204P
ENSG00000270240	11.0956	0.372112	0.141913	2.62211	0.00873873	0.168645
ENSG00000272799	9.29374	0.370197	0.136053	2.72099	0.00650876	0.153429
ENSG00000232815	18.2863	0.365077	0.130389	2.7999	0.00511185	0.138085	DUX4L50
ENSG00000162543	8.19125	0.362473	0.14024	2.58466	0.00974744	0.176357	UBXN10
ENSG00000211955	588.035	0.357974	0.114977	3.11343	0.00184923	0.0905915	IGHV3-33
ENSG00000130396	520.32	0.353552	0.101393	3.48696	0.000488546	0.0475222	AFDN
ENSG00000274605	10.6702	0.352661	0.132825	2.65508	0.00792892	0.162459
ENSG00000131401	976.193	0.35229	0.090761	3.88152	0.000103807	0.0190263	NAPSB
ENSG00000072694	408.525	0.349675	0.119208	2.93333	0.00335348	0.115639	FCGR2B
ENSG00000260101	79.9529	0.348405	0.0871732	3.9967	6.42328e-05	0.0171823
ENSG00000249741	19.9058	0.34495	0.124786	2.76434	0.00570373	0.142853
ENSG00000269800	12.3609	0.344207	0.127494	2.69978	0.00693853	0.155466	PLEKHA3P1
ENSG00000119865	15.599	0.343776	0.137467	2.5008	0.0123915	0.192308	CNRIP1
ENSG00000225342	18.8336	0.33936	0.109456	3.10042	0.00193246	0.0918603
ENSG00000065328	18.1427	0.336466	0.128869	2.61092	0.00902996	0.17193	MCM10
ENSG00000166833	33.3971	0.336193	0.120391	2.7925	0.00523025	0.139763	NAV2
ENSG00000162946	160.298	0.335054	0.0748983	4.47346	7.69642e-06	0.00597685	DISC1
ENSG00000262454	12.9109	0.334216	0.122888	2.71968	0.00653454	0.153464	MIR193BHG
ENSG00000137124	121.21	0.328628	0.0722915	4.54588	5.47061e-06	0.00556242	ALDH1B1
ENSG00000243753	328.566	0.328348	0.13007	2.5244	0.0115895	0.188249	HLA-L
ENSG00000281706	23.1133	0.327485	0.0911526	3.59271	0.000327254	0.0379693
ENSG00000111247	55.5324	0.326459	0.0978096	3.3377	0.000844747	0.0611648	RAD51AP1
ENSG00000013016	359.99	0.321148	0.0920295	3.48962	0.000483702	0.0472899	EHD3
ENSG00000187486	58.5503	0.320721	0.127129	2.52279	0.0116427	0.188249	KCNJ11
ENSG00000197465	21.9602	0.320546	0.123121	2.60349	0.0092279	0.174074	GYPE
ENSG00000228415	7.21828	0.318597	0.129153	2.46682	0.013632	0.196247	PTMAP1
ENSG00000112799	175.149	0.31645	0.0989277	3.1988	0.00138	0.0807865	LY86
ENSG00000250312	237.556	0.315611	0.121907	2.58894	0.00962719	0.175411	ZNF718
ENSG00000132185	645.35	0.314318	0.10023	3.13598	0.00171284	0.088443	FCRLA
ENSG00000168993	14.9324	0.313528	0.123612	2.53639	0.0112004	0.185576	CPLX1
ENSG00000170365	59.897	0.313138	0.0953856	3.28286	0.00102758	0.0687124	SMAD1
ENSG00000188130	37.8559	0.312672	0.0970993	3.22012	0.00128136	0.0773481	MAPK12
ENSG00000166689	191.139	0.311549	0.0782973	3.97905	6.91915e-05	0.0173069	PLEKHA7
ENSG00000240505	446.144	0.310795	0.101115	3.0737	0.00211424	0.0948463	TNFRSF13B
ENSG00000272821	110.467	0.30886	0.103053	2.99712	0.00272547	0.105023
ENSG00000180881	13.0782	0.303189	0.119436	2.5385	0.0111327	0.184713	CAPS2
ENSG00000189057	806.425	0.30095	0.118549	2.53862	0.0111291	0.184713	FAM111B
ENSG00000151240	99.0799	0.300231	0.0923061	3.25256	0.00114371	0.0719867	DIP2C
ENSG00000259408	10.5465	0.298942	0.121645	2.4575	0.0139909	0.198868
ENSG00000183486	3225.6	0.298055	0.11969	2.49022	0.0127662	0.193769	MX2
ENSG00000228463	143.023	0.296945	0.115666	2.56727	0.0102503	0.17939
ENSG00000205853	10.4307	0.296118	0.114967	2.57569	0.0100041	0.178244	RFPL3S
ENSG00000092096	44.9786	0.295889	0.115168	2.5692	0.0101935	0.17913	SLC22A17
ENSG00000128438	647.42	0.295109	0.100991	2.92214	0.00347635	0.116646	TBC1D27P
ENSG00000125726	77.1383	0.29218	0.113972	2.56361	0.0103591	0.179613	CD70
ENSG00000211593	45.175	0.290608	0.103534	2.80689	0.00500222	0.137436	IGKJ5
ENSG00000279415	18.8152	0.289123	0.106215	2.72206	0.00648757	0.153314
ENSG00000152056	132.801	0.286468	0.0800587	3.57822	0.00034594	0.0389637	AP1S3
ENSG00000275457	12.8589	0.28606	0.0994307	2.87698	0.00401504	0.125679
ENSG00000211945	395.279	0.284759	0.110903	2.56763	0.0102395	0.17939	IGHV1-18
ENSG00000261612	7.99666	0.284662	0.112841	2.52269	0.0116461	0.188249	SUB1P3
ENSG00000246203	120.389	0.284522	0.0800864	3.55269	0.000381318	0.041029
ENSG00000188383	17.1536	0.283844	0.0973004	2.9172	0.00353193	0.117082	GPAT2P2
ENSG00000234465	34.5633	0.278105	0.101506	2.7398	0.0061477	0.148563	PINLYP
ENSG00000197705	325.07	0.275249	0.0962906	2.85852	0.00425618	0.127613	KLHL14
ENSG00000111335	6344.24	0.274813	0.109414	2.51169	0.0120156	0.190504	OAS2
ENSG00000094804	37.527	0.274793	0.0900381	3.05197	0.00227346	0.0970608	CDC6
ENSG00000231389	4387.37	0.26645	0.0877153	3.03767	0.00238413	0.0983263	HLA-DPA1
ENSG00000172403	56.7331	0.266442	0.0855232	3.11543	0.00183676	0.0905915	SYNPO2
ENSG00000161929	90.3732	0.266208	0.106402	2.5019	0.0123528	0.192308	SCIMP
ENSG00000089177	228.135	0.265009	0.0583048	4.54524	5.48733e-06	0.00556242	KIF16B
ENSG00000154165	137.744	0.264406	0.09807	2.69609	0.00701577	0.155493	GPR15
ENSG00000088992	42.9926	0.262752	0.0804481	3.2661	0.00109039	0.0712572	TESC
ENSG00000171992	216.402	0.262559	0.0949546	2.7651	0.00569058	0.142853	SYNPO
ENSG00000248632	31.1703	0.262366	0.105969	2.47588	0.0132908	0.195554
ENSG00000171757	28.3904	0.256228	0.0895485	2.86134	0.00421859	0.127248	LRRC34
ENSG00000068079	1125.6	0.255771	0.102993	2.48337	0.0130146	0.194913	IFI35
ENSG00000167861	35.2485	0.255679	0.0849473	3.00985	0.00261378	0.10287	HID1
ENSG00000205559	30.4524	0.255174	0.0859051	2.97042	0.00297393	0.10987	CHKB-DT
ENSG00000204287	10795.3	0.250152	0.0725299	3.44895	0.000562777	0.052111	HLA-DRA
ENSG00000204428	54.4485	0.249778	0.0966615	2.58405	0.00976475	0.176357	LY6G5C
ENSG00000107242	110.425	0.249012	0.0843455	2.95229	0.00315426	0.113011	PIP5K1B
ENSG00000121858	1458.59	0.248611	0.0891652	2.7882	0.00530012	0.140312	TNFSF10
ENSG00000184293	193.656	0.245592	0.0684404	3.58841	0.000332704	0.0383082	CLECL1
ENSG00000263142	301.724	0.243469	0.0892027	2.72939	0.00634514	0.150502	LRRC37A17P
ENSG00000204475	53.2074	0.240741	0.0916396	2.62704	0.0086131	0.168073	NCR3
ENSG00000163069	114.116	0.239579	0.0612719	3.9101	9.22562e-05	0.0190263	SGCB
ENSG00000091490	1101.75	0.239429	0.0576686	4.15181	3.29855e-05	0.0119868	SEL1L3
ENSG00000019582	23705.3	0.238289	0.0586034	4.06613	4.77997e-05	0.0157427	CD74
ENSG00000137842	241.284	0.237365	0.0655578	3.6207	0.000293805	0.0367447	TMEM62
ENSG00000277149	178.036	0.236048	0.0952385	2.47849	0.0131938	0.194936	TYW1B
ENSG00000280441	444.677	0.233426	0.0943614	2.47374	0.0133706	0.195861
ENSG00000238041	13.0303	0.232792	0.0887677	2.62248	0.00872922	0.168631
ENSG00000114993	82.4684	0.232606	0.076655	3.03446	0.0024097	0.0987465	RTKN
ENSG00000269404	505.66	0.232075	0.0838309	2.76837	0.00563369	0.142395	SPIB
ENSG00000259086	19.0955	0.230869	0.0865929	2.66614	0.00767271	0.160642
ENSG00000139899	463.669	0.230805	0.0850509	2.71373	0.00665306	0.154603	CBLN3
ENSG00000231770	34.5845	0.229975	0.087797	2.6194	0.00880848	0.169313	TMEM44-AS1
ENSG00000115267	2067.36	0.22819	0.0907663	2.51404	0.0119359	0.1905	IFIH1
ENSG00000169258	47.7599	0.227694	0.0892699	2.55063	0.0107529	0.18249	GPRIN1
ENSG00000229474	680.242	0.226546	0.0815792	2.777	0.0054863	0.141622	PATL2
ENSG00000105948	52.2273	0.225908	0.0622257	3.63047	0.000282907	0.0358473	TTC26
ENSG00000137936	241.973	0.224573	0.0835494	2.68791	0.00719003	0.156275	BCAR3
ENSG00000170089	565.537	0.221141	0.082194	2.69048	0.00713502	0.156184
ENSG00000125247	437.803	0.221003	0.056927	3.88222	0.000103505	0.0190263	TMTC4
ENSG00000204584	46.4806	0.219618	0.0657105	3.3422	0.000831167	0.0608338
ENSG00000255200	26.7096	0.219298	0.0840994	2.6076	0.00911796	0.172722	PGAM1P8
ENSG00000228847	18.1825	0.218944	0.0855601	2.55895	0.0104988	0.181027	ATP5MC2P4
ENSG00000262823	26.7158	0.218399	0.0842949	2.59089	0.00957277	0.175411
ENSG00000274750	138.552	0.21726	0.0741285	2.93086	0.0033803	0.115639	HIST1H3E
ENSG00000101003	45.0528	0.215975	0.0781936	2.76206	0.00574386	0.143236	GINS1
ENSG00000130303	2155.9	0.211592	0.0824342	2.5668	0.0102642	0.17939	BST2
ENSG00000172123	273.262	0.210818	0.0781739	2.69679	0.00700121	0.155466	SLFN12
ENSG00000151914	143.55	0.210807	0.0755698	2.78957	0.00527787	0.140312	DST
ENSG00000152689	538.704	0.209492	0.0715412	2.92827	0.00340858	0.116197	RASGRP3
ENSG00000228672	109.632	0.209474	0.0842272	2.48701	0.012882	0.194428	PROB1
ENSG00000240527	71.5631	0.208816	0.0706554	2.95541	0.00312252	0.112963
ENSG00000176974	247.622	0.207845	0.0581951	3.57151	0.000354924	0.0395135	SHMT1
ENSG00000214595	185.36	0.207798	0.0822665	2.52592	0.0115397	0.188192	EML6
ENSG00000153094	3077.31	0.206011	0.0428265	4.81035	1.50665e-06	0.00362727	BCL2L11
ENSG00000277534	29.9462	0.205952	0.0765481	2.69049	0.00713472	0.156184
ENSG00000081189	1004.49	0.205637	0.0776125	2.64953	0.00806035	0.163585	MEF2C
ENSG00000225558	16.6743	0.205622	0.0820146	2.50714	0.0121713	0.191832	UBE2D3P2
ENSG00000145088	172.337	0.20539	0.073677	2.78771	0.00530814	0.140312	EAF2
ENSG00000073111	300.084	0.205276	0.0528039	3.88751	0.000101277	0.0190263	MCM2
ENSG00000112773	467.596	0.203885	0.0825384	2.47019	0.0135042	0.196247	TENT5A
ENSG00000096092	86.9212	0.203057	0.0584764	3.47246	0.00051572	0.0490272	TMEM14A
ENSG00000187210	291.67	0.202501	0.0727776	2.78247	0.00539471	0.14088	GCNT1
ENSG00000223865	2274.04	0.201631	0.0726942	2.77369	0.0055424	0.141888	HLA-DPB1
ENSG00000146243	94.8473	0.200546	0.0598014	3.35353	0.00079788	0.0598294	IRAK1BP1
ENSG00000230797	31.1993	0.199565	0.0792433	2.51839	0.0117894	0.189063	YY2
ENSG00000147912	112.09	0.198446	0.0553859	3.58297	0.000339708	0.0384869	FBXO10
ENSG00000224536	35.0758	0.196306	0.0783465	2.50561	0.0122241	0.192068
ENSG00000138185	640.288	0.195257	0.0788111	2.47753	0.0132294	0.195142	ENTPD1
ENSG00000074657	296.075	0.191197	0.0601715	3.17754	0.00148531	0.0831777	ZNF532
ENSG00000204252	983.036	0.190219	0.071513	2.65993	0.0078158	0.161515	HLA-DOA
ENSG00000184178	202.887	0.190044	0.0513963	3.69763	0.000217626	0.030373	SCFD2
ENSG00000086289	53.5595	0.18757	0.0746971	2.51107	0.0120365	0.190504	EPDR1
ENSG00000261338	118.819	0.187404	0.0658357	2.84654	0.00441966	0.12976
ENSG00000104738	481.774	0.187222	0.0430885	4.34505	1.39244e-05	0.00727069	MCM4
ENSG00000120280	545.372	0.186651	0.0549796	3.39491	0.000686511	0.0573433	CXorf21
ENSG00000115841	74.7809	0.186019	0.0663916	2.80184	0.00508118	0.138085	RMDN2
ENSG00000012048	179.771	0.185169	0.0568742	3.25577	0.00113087	0.071587	BRCA1
ENSG00000101888	379.217	0.184682	0.0450314	4.10119	4.11035e-05	0.0141367	NXT2
ENSG00000159228	255.914	0.183586	0.0595315	3.08385	0.0020434	0.0932606	CBR1
ENSG00000213569	29.1802	0.182583	0.0656166	2.78257	0.00539299	0.14088
ENSG00000178295	1082.41	0.18256	0.0650781	2.80525	0.00502776	0.137673	GEN1
ENSG00000181938	68.1004	0.182318	0.0530262	3.43826	0.000585454	0.0529383	GINS3
ENSG00000260686	60.7437	0.182039	0.0692332	2.62936	0.00855447	0.167608
ENSG00000171428	161.035	0.181192	0.0481043	3.76665	0.000165451	0.0257572	NAT1
ENSG00000163754	563.716	0.18039	0.0667727	2.70155	0.00690174	0.155466	GYG1
ENSG00000184489	98.1229	0.18034	0.0723212	2.49359	0.0126457	0.193338	PTP4A3
ENSG00000008283	267.478	0.179054	0.0638556	2.80405	0.00504657	0.137673	CYB561
ENSG00000168060	100.788	0.177069	0.0671934	2.63521	0.00840849	0.166225	NAALADL1
ENSG00000179583	2731.27	0.176895	0.0679718	2.60247	0.00925547	0.174252	CIITA
ENSG00000165338	174.555	0.174509	0.0668012	2.61237	0.00899162	0.171609	HECTD2
ENSG00000140025	41.3323	0.172341	0.0665587	2.58931	0.00961696	0.175411	EFCAB11
ENSG00000240024	52.3252	0.17131	0.0692144	2.47506	0.0133214	0.195557	LINC00888
ENSG00000160293	661.452	0.171306	0.0618203	2.77104	0.00558782	0.141981	VAV2
ENSG00000136193	675.835	0.171184	0.0591679	2.89319	0.00381356	0.122608	SCRN1
ENSG00000097021	159.629	0.170746	0.0685298	2.49156	0.0127184	0.193489	ACOT7
ENSG00000114904	532.445	0.169615	0.0458039	3.70307	0.000213009	0.0301658	NEK4
ENSG00000235106	338.848	0.168874	0.0454407	3.71637	0.000202106	0.0293055	BRD3OS
ENSG00000163170	85.9512	0.16851	0.0493529	3.41439	0.000639256	0.0547203	BOLA3
ENSG00000149554	73.9827	0.16832	0.0605678	2.77904	0.00545196	0.141622	CHEK1
ENSG00000112208	153.977	0.167882	0.0420754	3.99003	6.60648e-05	0.0171947	BAG2
ENSG00000136783	385.904	0.166677	0.0444508	3.74969	0.00017705	0.0270634	NIPSNAP3A
ENSG00000125885	558.424	0.166363	0.0534448	3.1128	0.00185322	0.0905915	MCM8
ENSG00000226688	168.685	0.166184	0.0632917	2.62568	0.00864766	0.16822	ENTPD1-AS1
ENSG00000102221	240.655	0.16616	0.0666176	2.49424	0.0126226	0.193338	JADE3
ENSG00000147400	266.872	0.165651	0.0531439	3.11703	0.00182686	0.0905915	CETN2
ENSG00000181350	66.2373	0.165125	0.0630481	2.61903	0.0088179	0.169325	LRRC75A
ENSG00000185880	1646.04	0.164147	0.0547705	2.99701	0.00272646	0.105023	TRIM69
ENSG00000183508	1760.14	0.163087	0.0663923	2.45642	0.0140329	0.199149	TENT5C
ENSG00000280351	71.5122	0.162764	0.0633448	2.56949	0.0101848	0.17913
ENSG00000068097	758.055	0.162655	0.0605377	2.68683	0.00721334	0.156275	HEATR6
ENSG00000175567	3835.13	0.161705	0.0602952	2.68188	0.00732092	0.157192	UCP2
ENSG00000151729	121.784	0.161267	0.0530053	3.04246	0.00234652	0.0980346	SLC25A4
ENSG00000001561	720.016	0.161137	0.0544722	2.95815	0.00309489	0.11268	ENPP4
ENSG00000253276	650.906	0.159525	0.0517636	3.08179	0.00205757	0.0934643	CCDC71L
ENSG00000136247	317.045	0.15902	0.035532	4.4754	7.62684e-06	0.00597685	ZDHHC4
ENSG00000133195	222.154	0.158778	0.0589467	2.69359	0.00706861	0.155595	SLC39A11
ENSG00000177432	89.7986	0.157661	0.0563559	2.7976	0.00514833	0.138357	NAP1L5
ENSG00000140104	90.6282	0.157025	0.052844	2.97148	0.0029637	0.109771	CLBA1
ENSG00000204267	2865.91	0.15599	0.0585086	2.66611	0.00767347	0.160642	TAP2
ENSG00000108384	213.893	0.155967	0.0400183	3.89741	9.7228e-05	0.0190263	RAD51C
ENSG00000181004	105.481	0.155881	0.0558908	2.78903	0.00528654	0.140312	BBS12
ENSG00000152492	1636.21	0.155723	0.0547203	2.8458	0.00443006	0.129844	CCDC50
ENSG00000170430	181.084	0.155128	0.0581589	2.66732	0.00764585	0.160642	MGMT
ENSG00000063241	235.182	0.154895	0.0508385	3.04681	0.00231281	0.0977136	ISOC2
ENSG00000182628	322.885	0.154537	0.0573095	2.69654	0.00700645	0.155466	SKA2
ENSG00000198924	281.203	0.15441	0.0496936	3.10725	0.00188837	0.0911531	DCLRE1A
ENSG00000136636	105.02	0.153506	0.0546068	2.81112	0.004937	0.136543	KCTD3
ENSG00000101868	355.685	0.153237	0.0388326	3.9461	7.9435e-05	0.0184327	POLA1
ENSG00000117016	163.477	0.152303	0.0614227	2.47959	0.0131532	0.194936	RIMS3
ENSG00000111885	1950.87	0.151712	0.0516718	2.93606	0.00332405	0.115562	MAN1A1
ENSG00000213985	92.4877	0.151531	0.0546713	2.77168	0.00557682	0.141888
ENSG00000115526	136.313	0.151192	0.0589459	2.56493	0.0103197	0.179613	CHST10
ENSG00000266028	1491.87	0.150927	0.0610128	2.47369	0.0133727	0.195861	SRGAP2
ENSG00000239672	130.065	0.149666	0.0609575	2.45525	0.0140788	0.199298	NME1
ENSG00000163376	734.897	0.149424	0.0573515	2.60541	0.00917641	0.173442	KBTBD8
ENSG00000119969	201.33	0.148278	0.0507281	2.923	0.00346673	0.116573	HELLS
ENSG00000124243	566.919	0.147986	0.057	2.59625	0.00942462	0.174685	BCAS4
ENSG00000269973	81.0943	0.147764	0.0510925	2.89209	0.00382686	0.122608
ENSG00000181830	445.701	0.146651	0.0356933	4.10863	3.98007e-05	0.0139375	SLC35C1
ENSG00000013392	143.194	0.146482	0.056394	2.59748	0.0093911	0.174685	RWDD2A
ENSG00000184992	286.935	0.14578	0.0566716	2.57236	0.0101009	0.178895	BRI3BP
ENSG00000159423	72.1339	0.145372	0.0538701	2.69857	0.00696382	0.155466	ALDH4A1
ENSG00000163412	943.061	0.144768	0.058781	2.46283	0.0137845	0.197098	EIF4E3
ENSG00000159259	66.5634	0.144091	0.0494882	2.91162	0.00359556	0.118377	CHAF1B
ENSG00000109084	120.904	0.144051	0.0485781	2.96535	0.00302341	0.11056	TMEM97
ENSG00000149218	422.385	0.143315	0.0462107	3.10133	0.00192654	0.0918603	ENDOD1
ENSG00000159792	512.232	0.142507	0.0330524	4.31156	1.62109e-05	0.0078942	PSKH1
ENSG00000169981	106.721	0.141981	0.0533484	2.66139	0.00778177	0.160985	ZNF35
ENSG00000163959	87.5259	0.141508	0.0576431	2.4549	0.0140922	0.199298	SLC51A
ENSG00000120675	720.06	0.140851	0.0479825	2.93547	0.00333044	0.115568	DNAJC15
ENSG00000033170	502.395	0.140238	0.0385228	3.64039	0.00027223	0.0354204	FUT8
ENSG00000198736	303.182	0.139575	0.0492395	2.83462	0.00458809	0.132315	MSRB1
ENSG00000177873	170.288	0.139574	0.0455807	3.06212	0.00219775	0.0957662	ZNF619
ENSG00000165118	251.247	0.138512	0.052473	2.63968	0.00829836	0.165669	C9orf64
ENSG00000198585	387.484	0.136956	0.0515802	2.6552	0.00792609	0.162459	NUDT16
ENSG00000148057	151.867	0.13692	0.0469302	2.91752	0.00352829	0.117082	IDNK
ENSG00000214717	1155.77	0.135601	0.0508095	2.66881	0.00761208	0.160642	ZBED1
ENSG00000135972	337.257	0.135471	0.0445842	3.03855	0.00237719	0.0982504	MRPS9
ENSG00000254986	620.583	0.135344	0.0345401	3.91845	8.91199e-05	0.0190263	DPP3
ENSG00000198538	562.857	0.1342	0.0389755	3.44319	0.000574894	0.052726	ZNF28
ENSG00000142252	151.64	0.134035	0.0435653	3.07666	0.00209337	0.0946441	GEMIN7
ENSG00000169519	279.679	0.133177	0.0442656	3.00859	0.00262464	0.102954	METTL15
ENSG00000175893	600.299	0.132614	0.0518855	2.55589	0.0105917	0.181169	ZDHHC21
ENSG00000196345	117.773	0.132334	0.0507638	2.60686	0.00913771	0.17288	ZKSCAN7
ENSG00000113356	101.69	0.131681	0.0470089	2.80119	0.00509143	0.138085	POLR3G
ENSG00000132406	351.583	0.130664	0.0371467	3.5175	0.000435625	0.0451083	TMEM128
ENSG00000181192	880.577	0.130605	0.0474821	2.75062	0.00594829	0.146223	DHTKD1
ENSG00000179627	144.351	0.129703	0.0493883	2.62619	0.0086347	0.168154	ZBTB42
ENSG00000085644	369.498	0.128081	0.036486	3.5104	0.000447425	0.0455947	ZNF213
ENSG00000139405	232.283	0.127571	0.0445465	2.86377	0.00418628	0.126904	RITA1
ENSG00000100297	1586.41	0.127342	0.0402872	3.16085	0.00157309	0.0857155	MCM5
ENSG00000162065	385.045	0.126978	0.040926	3.10262	0.00191819	0.0918603	TBC1D24
ENSG00000174442	231.159	0.125608	0.0394098	3.18722	0.00143649	0.0820975	ZWILCH
ENSG00000101945	154.076	0.125449	0.0389895	3.2175	0.00129315	0.0773481	SUV39H1
ENSG00000143799	4222.35	0.125367	0.0375232	3.34104	0.000834645	0.0608338	PARP1
ENSG00000106305	169.777	0.125005	0.0407749	3.06573	0.00217142	0.0953533	AIMP2
ENSG00000164597	883.815	0.124538	0.0318392	3.91146	9.1741e-05	0.0190263	COG5
ENSG00000100749	346.209	0.124294	0.0319246	3.89335	9.88708e-05	0.0190263	VRK1
ENSG00000162623	575.888	0.123321	0.0304592	4.04874	5.14949e-05	0.0157427	TYW3
ENSG00000137168	377.229	0.122602	0.0362572	3.38145	0.000721045	0.0584401	PPIL1
ENSG00000214013	436.925	0.122049	0.0286615	4.25829	2.05996e-05	0.00901699	GANC
ENSG00000181751	169.631	0.121812	0.0388235	3.13758	0.00170347	0.088443	C5orf30
ENSG00000135537	66.3503	0.121357	0.0476692	2.54581	0.0109025	0.18339	AFG1L
ENSG00000183044	395.75	0.12129	0.0412719	2.93881	0.00329475	0.1151	ABAT
ENSG00000092036	129.116	0.120844	0.044907	2.69099	0.00712396	0.156184	HAUS4
ENSG00000151366	132.713	0.120838	0.0456922	2.64461	0.00817858	0.164425	NDUFC2
ENSG00000179958	329.719	0.120448	0.0423116	2.84668	0.00441777	0.12976	DCTPP1
ENSG00000116237	856.819	0.120029	0.0415616	2.88798	0.0038772	0.123634	ICMT
ENSG00000011376	536.011	0.119946	0.0355857	3.37063	0.000749965	0.0584401	LARS2
ENSG00000198860	922.071	0.119591	0.0307508	3.88905	0.000100639	0.0190263	TSEN15
ENSG00000151065	336.806	0.11952	0.0440598	2.71268	0.0066742	0.154699	DCP1B
ENSG00000189159	699.495	0.119478	0.0393048	3.03978	0.0023675	0.0982504	JPT1
ENSG00000059573	1022.73	0.119051	0.0404427	2.9437	0.00324309	0.114399	ALDH18A1
ENSG00000198890	449.45	0.118962	0.0354679	3.35407	0.000796313	0.0598294	PRMT6
ENSG00000184009	27180.5	0.118961	0.0474197	2.50868	0.0121185	0.19147	ACTG1
ENSG00000076770	1342.71	0.1188	0.0421555	2.81814	0.0048303	0.135024	MBNL3
ENSG00000170903	477.864	0.118316	0.0270652	4.3715	1.23398e-05	0.00723742	MSANTD4
ENSG00000139291	567.663	0.117917	0.0418981	2.81437	0.00488727	0.136024	TMEM19
ENSG00000104356	291.278	0.1178	0.0435233	2.70661	0.00679742	0.155174	POP1
ENSG00000167333	336.28	0.116154	0.0366178	3.17206	0.00151362	0.0840125	TRIM68
ENSG00000113318	339.415	0.115058	0.0392537	2.93114	0.00337719	0.115639	MSH3
ENSG00000146143	207.912	0.114705	0.0383351	2.99216	0.00277011	0.10626	PRIM2
ENSG00000075131	105.182	0.113319	0.0392084	2.89018	0.00385021	0.122977	TIPIN
ENSG00000181450	282.447	0.113227	0.0366267	3.09137	0.00199233	0.0919591	ZNF678
ENSG00000110871	374.823	0.112834	0.0364818	3.09289	0.00198221	0.0919591	COQ5
ENSG00000233954	105.742	0.112358	0.0420673	2.6709	0.00756475	0.160283	UQCRHL
ENSG00000168496	292.107	0.111949	0.0357978	3.12726	0.00176442	0.0903132	FEN1
ENSG00000132801	185.65	0.111073	0.0347677	3.19472	0.00139967	0.0815888	ZSWIM3
ENSG00000124120	780.411	0.110982	0.0290237	3.82384	0.000131388	0.0220046	TTPAL
ENSG00000164144	611.293	0.11072	0.0382356	2.89572	0.0037829	0.122246	ARFIP1
ENSG00000126067	1468.88	0.110338	0.0339998	3.24525	0.00117346	0.0733233	PSMB2
ENSG00000128829	1189.48	0.10996	0.0370276	2.96967	0.00298116	0.10987	EIF2AK4
ENSG00000133119	161.975	0.10957	0.0414183	2.64544	0.00815838	0.164191	RFC3
ENSG00000116793	481.663	0.10954	0.0437861	2.5017	0.0123599	0.192308	PHTF1
ENSG00000019485	289.401	0.10817	0.0406261	2.66258	0.00775445	0.160938	PRDM11
ENSG00000230733	181.459	0.107978	0.0431509	2.50233	0.012338	0.192308
ENSG00000167461	658.886	0.107452	0.0338632	3.17313	0.00150804	0.0839449	RAB8A
ENSG00000113272	236.844	0.107288	0.0373091	2.87564	0.00403215	0.125865	THG1L
ENSG00000176087	1543.27	0.10674	0.027072	3.94283	8.05272e-05	0.0184637	SLC35A4
ENSG00000087299	162.942	0.106707	0.0359869	2.96517	0.00302519	0.11056	L2HGDH
ENSG00000166189	633.48	0.106599	0.0427518	2.49344	0.0126511	0.193338	HPS6
ENSG00000100280	2412.21	0.106157	0.0394613	2.69016	0.00714185	0.156184	AP1B1
ENSG00000152455	228.454	0.106061	0.0347166	3.05505	0.00225024	0.0963102	SUV39H2
ENSG00000085719	2008.27	0.10581	0.0341367	3.09959	0.00193789	0.0918603	CPNE3
ENSG00000172057	2299	0.105804	0.0429378	2.46411	0.0137352	0.196831	ORMDL3
ENSG00000143493	535.001	0.10454	0.0369633	2.82821	0.00468084	0.132428	INTS7
ENSG00000119383	1549.03	0.104199	0.0347801	2.99593	0.00273607	0.105183	PTPA
ENSG00000136824	596.352	0.104137	0.0386525	2.6942	0.00705586	0.155595	SMC2
ENSG00000187049	217.282	0.103845	0.0384017	2.70419	0.00684717	0.155332	TMEM216
ENSG00000170006	655.69	0.103731	0.0420947	2.46424	0.0137305	0.196831	TMEM154
ENSG00000143374	634.233	0.103459	0.0329103	3.14367	0.00166842	0.0875582	TARS2
ENSG00000138346	170.711	0.102954	0.0380036	2.70905	0.00674753	0.154896	DNA2
ENSG00000169093	805.238	0.102953	0.0331475	3.10591	0.00189695	0.0913379	ASMTL
ENSG00000147419	683.221	0.101993	0.0283544	3.59707	0.000321828	0.0377271	CCDC25
ENSG00000089220	1628.3	0.10189	0.0324787	3.13715	0.001706	0.088443	PEBP1
ENSG00000164494	262.922	0.101488	0.03187	3.18442	0.00145043	0.0823835	PDSS2
ENSG00000122687	500.483	0.101225	0.0400364	2.52833	0.0114606	0.187697	MRM2
ENSG00000197863	156.89	0.100727	0.0359595	2.80111	0.00509276	0.138085	ZNF790
ENSG00000105676	506.949	0.100683	0.0328508	3.06484	0.00217784	0.0953533	ARMC6
ENSG00000116288	2037.13	0.0998987	0.0284505	3.51132	0.000445895	0.0455947	PARK7
ENSG00000237190	174.554	0.0998673	0.0355294	2.81083	0.00494134	0.136543	CDKN2AIPNL
ENSG00000177548	1070.88	0.0995809	0.0396538	2.51125	0.0120303	0.190504	RABEP2
ENSG00000206337	2932.01	0.0994868	0.0397028	2.50579	0.0122179	0.192068	HCP5
ENSG00000075188	243.527	0.0988688	0.0345693	2.86002	0.00423618	0.127483	NUP37
ENSG00000130772	431.707	0.098749	0.0288833	3.41889	0.000628763	0.0540624	MED18
ENSG00000132825	311.292	0.098681	0.0383646	2.57219	0.0101058	0.178895	PPP1R3D
ENSG00000128059	419.111	0.0985457	0.0396195	2.48731	0.0128714	0.194428	PPAT
ENSG00000030110	806.802	0.0977385	0.0381056	2.56494	0.0103195	0.179613	BAK1
ENSG00000179886	241.503	0.0975821	0.0389647	2.50437	0.0122669	0.192275	TIGD5
ENSG00000152457	720.277	0.0974686	0.0258595	3.76916	0.0001638	0.0257572	DCLRE1C
ENSG00000139579	326.202	0.0973735	0.0394469	2.46847	0.0135691	0.196247	NABP2
ENSG00000134049	375.921	0.0973682	0.0319095	3.05139	0.00227785	0.0970608	IER3IP1
ENSG00000102893	1959.29	0.0964331	0.039106	2.46594	0.0136654	0.196267	PHKB
ENSG00000178952	2538.64	0.0962558	0.0338114	2.84684	0.00441549	0.12976	TUFM
ENSG00000167085	795.847	0.0960414	0.0336333	2.85555	0.00429625	0.127954	PHB
ENSG00000165934	1885.33	0.0959436	0.0324716	2.9547	0.00312976	0.112963	CPSF2
ENSG00000119927	274.659	0.0953425	0.0373949	2.54961	0.0107843	0.18249	GPAM
ENSG00000138459	607.33	0.0944334	0.0341876	2.76221	0.0057411	0.143236	SLC35A5
ENSG00000075142	652.26	0.0942112	0.0318633	2.95674	0.00310914	0.112772	SRI
ENSG00000164167	414.284	0.0940411	0.0281539	3.34025	0.000837018	0.0608338	LSM6
ENSG00000152240	338.259	0.0938794	0.0329223	2.85154	0.00435074	0.128935	HAUS1
ENSG00000111875	719.973	0.0931279	0.0301789	3.08586	0.00202962	0.0928516	ASF1A
ENSG00000172171	164.586	0.0930806	0.0324658	2.86703	0.00414343	0.126904	TEFM
ENSG00000104325	903.351	0.0929784	0.0336708	2.76139	0.00575554	0.143236	DECR1
ENSG00000167088	666.444	0.0919899	0.0305569	3.01044	0.00260866	0.10287	SNRPD1
ENSG00000111358	724.196	0.0916932	0.0311789	2.94088	0.00327285	0.114982	GTF2H3
ENSG00000111880	792.328	0.0913433	0.027733	3.29366	0.000988911	0.0677809	RNGTT
ENSG00000125166	921.319	0.0908396	0.0295574	3.07333	0.00211688	0.0948463	GOT2
ENSG00000108395	678.859	0.090693	0.0269139	3.36975	0.000752377	0.0584401	TRIM37
ENSG00000169955	165.135	0.0904483	0.0348578	2.59478	0.00946508	0.174685	ZNF747
ENSG00000131844	1222.17	0.0902352	0.02392	3.77237	0.000161705	0.0257392	MCCC2
ENSG00000151332	311.39	0.0896684	0.0362993	2.47025	0.0135017	0.196247	MBIP
ENSG00000164574	1457.25	0.0896208	0.0317054	2.82667	0.00470341	0.132428	GALNT10
ENSG00000114978	7889.14	0.0890313	0.0297983	2.9878	0.00280996	0.106745	MOB1A
ENSG00000133935	375.495	0.0888989	0.032567	2.72972	0.00633876	0.150502	ERG28
ENSG00000119616	994.086	0.0886816	0.0246259	3.60115	0.000316817	0.037666	FCF1
ENSG00000123297	276.71	0.0880109	0.0336408	2.6162	0.00889153	0.170399	TSFM
ENSG00000163832	312.893	0.0879664	0.0269958	3.25852	0.00111994	0.0714937	ELP6
ENSG00000139343	440.547	0.0874139	0.0331253	2.63889	0.00831783	0.165669	SNRPF
ENSG00000134308	4205.04	0.0861593	0.0331345	2.60029	0.00931455	0.174682	YWHAQ
ENSG00000131779	583.583	0.0858648	0.0235332	3.64867	0.000263601	0.0350135	PEX11B
ENSG00000083720	794.294	0.0857695	0.0321579	2.66713	0.00765016	0.160642	OXCT1
ENSG00000172840	441.3	0.0854376	0.0344064	2.48319	0.0130211	0.194913	PDP2
ENSG00000150768	761.661	0.0853953	0.0260327	3.2803	0.00103696	0.0688682	DLAT
ENSG00000119912	953.092	0.0850609	0.0307539	2.76585	0.00567741	0.142784	IDE
ENSG00000084090	3567.79	0.0849627	0.029583	2.87201	0.00407868	0.126187	STARD7
ENSG00000119685	334.925	0.0848387	0.029007	2.92477	0.00344715	0.116477	TTLL5
ENSG00000165672	1466.68	0.0845236	0.0334553	2.52647	0.0115216	0.188192	PRDX3
ENSG00000155849	1257.57	0.0838181	0.0326031	2.57086	0.0101445	0.179024	ELMO1
ENSG00000117593	571.358	0.0832367	0.0294372	2.82761	0.00468975	0.132428	DARS2
ENSG00000164062	1646.26	0.082999	0.0313314	2.64907	0.0080713	0.163635	APEH
ENSG00000160993	223.692	0.0828058	0.0335707	2.46661	0.0136399	0.196247	ALKBH4
ENSG00000143158	306.17	0.0827577	0.0282217	2.93242	0.00336334	0.115639	MPC2
ENSG00000198498	294.259	0.0816786	0.0332927	2.45335	0.0141532	0.1997	TMA16
ENSG00000115364	513.954	0.0813824	0.0279041	2.9165	0.00353979	0.117141	MRPL19
ENSG00000134014	844.756	0.0812564	0.0224655	3.61694	0.000298109	0.0368684	ELP3
ENSG00000077232	2970.74	0.0807008	0.0302448	2.66826	0.00762459	0.160642	DNAJC10
ENSG00000083093	378.315	0.0801312	0.0269966	2.96819	0.00299556	0.110104	PALB2
ENSG00000138085	658.566	0.0800015	0.028037	2.85343	0.00432505	0.12855	ATRAID
ENSG00000032389	431.6	0.0799799	0.0280484	2.8515	0.0043514	0.128935	EIPR1
ENSG00000204138	1221.49	0.0798959	0.0282696	2.82621	0.00471028	0.132428	PHACTR4
ENSG00000167112	485.784	0.0796224	0.0295231	2.69696	0.00699764	0.155466	TRUB2
ENSG00000169193	249.232	0.0793929	0.0319928	2.48159	0.0130797	0.194933	CCDC126
ENSG00000114744	695.052	0.0791562	0.027857	2.84152	0.00448988	0.130825	COMMD2
ENSG00000155115	637.142	0.0790005	0.0318255	2.48231	0.0130535	0.194933	GTF3C6
ENSG00000092978	334.844	0.0787431	0.0269213	2.92494	0.00344521	0.116477	GPATCH2
ENSG00000006744	1247.07	0.0785955	0.024901	3.15632	0.00159771	0.0857155	ELAC2
ENSG00000213380	372.284	0.078404	0.0273466	2.86705	0.0041432	0.126904	COG8
ENSG00000074266	739.844	0.0780231	0.0244501	3.19112	0.00141722	0.0817237	EED
ENSG00000185220	405.557	0.0779145	0.0305269	2.55232	0.0107007	0.18249	PGBD2
ENSG00000004455	1907.2	0.0777701	0.030004	2.59199	0.00954222	0.175346	AK2
ENSG00000124562	636.662	0.0775406	0.0307794	2.51923	0.0117611	0.189063	SNRPC
ENSG00000100865	382.688	0.0775115	0.029721	2.60797	0.00910811	0.172722	CINP
ENSG00000164332	1176.03	0.0770963	0.0271266	2.8421	0.00448178	0.130787	UBLCP1
ENSG00000099968	1079.03	0.0767951	0.027548	2.78769	0.00530861	0.140312	BCL2L13
ENSG00000132313	664.307	0.0765928	0.0307479	2.49099	0.0127388	0.193645	MRPL35
ENSG00000188917	723.216	0.0764906	0.029542	2.58922	0.00961941	0.175411	TRMT2B
ENSG00000129559	331.767	0.0758512	0.0302678	2.506	0.0122105	0.192068	NEDD8
ENSG00000114491	603.296	0.0757454	0.027399	2.76453	0.00570051	0.142853	UMPS
ENSG00000186283	803.846	0.0748957	0.0270508	2.76871	0.00562785	0.142395	TOR3A
ENSG00000128513	552.296	0.0745371	0.0239425	3.11318	0.00185084	0.0905915	POT1
ENSG00000004142	1180.01	0.0735102	0.0249218	2.94963	0.00318154	0.113265	POLDIP2
ENSG00000132434	274.691	0.0730783	0.0288139	2.53621	0.0112059	0.185576	LANCL2
ENSG00000135452	471.819	0.073053	0.0294375	2.48163	0.0130784	0.194933	TSPAN31
ENSG00000175087	412.774	0.0729449	0.0296712	2.45845	0.013954	0.198489	PDIK1L
ENSG00000274523	779.575	0.0726487	0.0274524	2.64635	0.00813655	0.164094	RCC1L
ENSG00000177054	482.059	0.0725462	0.0290141	2.50038	0.0124061	0.192308	ZDHHC13
ENSG00000101811	350.53	0.0723368	0.0280963	2.5746	0.0100355	0.17843	CSTF2
ENSG00000214114	283.393	0.07224	0.0289037	2.49934	0.0124427	0.192486	MYCBP
ENSG00000211460	1617.23	0.0720358	0.0216531	3.32682	0.000878442	0.0622801	TSN
ENSG00000111667	1705.44	0.0718569	0.0225353	3.18863	0.00142946	0.0820975	USP5
ENSG00000172500	735.109	0.0716661	0.0272018	2.63461	0.00842346	0.166225	FIBP
ENSG00000117697	615.946	0.0716512	0.0283877	2.52403	0.0116019	0.188249	NSL1
ENSG00000185651	2159.1	0.071619	0.0233675	3.06489	0.00217749	0.0953533	UBE2L3
ENSG00000089063	1588.79	0.0714434	0.0258805	2.76051	0.00577109	0.143236	TMEM230
ENSG00000163918	339.623	0.0712413	0.0267642	2.66181	0.00777212	0.160958	RFC4
ENSG00000137171	503.857	-0.0706201	0.0275076	-2.5673	0.0102495	0.17939	KLC4
ENSG00000150401	452.122	-0.0709465	0.023744	-2.98798	0.00280828	0.106745	DCUN1D2
ENSG00000129351	9389.41	-0.0710462	0.0288105	-2.46598	0.0136638	0.196267	ILF3
ENSG00000007545	798.303	-0.071248	0.021054	-3.38406	0.000714231	0.0584401	CRAMP1
ENSG00000185049	767.16	-0.0714331	0.0276961	-2.57918	0.00990364	0.177197	NELFA
ENSG00000054267	4294.71	-0.0714531	0.0288445	-2.47718	0.0132425	0.195142	ARID4B
ENSG00000115211	820.594	-0.0716647	0.0283495	-2.5279	0.0114747	0.187768	EIF2B4
ENSG00000164548	2694.96	-0.0718232	0.0289916	-2.47739	0.0132349	0.195142	TRA2A
ENSG00000177239	1742.18	-0.0718707	0.022943	-3.13258	0.00173277	0.0892332	MAN1B1
ENSG00000173933	544.459	-0.0719026	0.0291515	-2.46651	0.0136436	0.196247	RBM4
ENSG00000155229	1990.8	-0.071998	0.0248591	-2.89625	0.00377654	0.122246	MMS19
ENSG00000162923	5873.06	-0.0720405	0.0267136	-2.69678	0.00700143	0.155466	WDR26
ENSG00000164180	765.905	-0.0722094	0.0267422	-2.7002	0.00692972	0.155466	TMEM161B
ENSG00000169967	3620.31	-0.0723811	0.0293866	-2.46306	0.0137756	0.197098	MAP3K2
ENSG00000133275	3263.34	-0.0724802	0.027735	-2.61331	0.00896698	0.171333	CSNK1G2
ENSG00000143614	2814.15	-0.0726011	0.029034	-2.50056	0.0123999	0.192308	GATAD2B
ENSG00000052841	2324.3	-0.0727272	0.0186583	-3.89785	9.705e-05	0.0190263	TTC17
ENSG00000127483	7858.29	-0.0732382	0.0249073	-2.94044	0.00327751	0.114982	HP1BP3
ENSG00000109736	1742.26	-0.0732857	0.0282233	-2.59664	0.00941406	0.174685	MFSD10
ENSG00000157181	663.572	-0.0733604	0.0288016	-2.5471	0.0108623	0.183151	ODR4
ENSG00000071626	4095.69	-0.0735015	0.0204236	-3.59885	0.00031963	0.0377271	DAZAP1
ENSG00000100650	10944.2	-0.0736009	0.0256176	-2.87307	0.00406509	0.126077	SRSF5
ENSG00000119688	1477.9	-0.0737811	0.0285057	-2.5883	0.00964523	0.175411	ABCD4
ENSG00000108465	622.564	-0.0742883	0.0293823	-2.52833	0.0114606	0.187697	CDK5RAP3
ENSG00000170852	2041.15	-0.0748068	0.0249397	-2.9995	0.00270421	0.104584	KBTBD2
ENSG00000039650	1283.91	-0.0749884	0.0267004	-2.80851	0.00497708	0.137011	PNKP
ENSG00000196199	3857.28	-0.0752023	0.0241992	-3.10763	0.00188592	0.0911531	MPHOSPH8
ENSG00000156858	1738.5	-0.0753293	0.0300868	-2.50373	0.0122892	0.192275	PRR14
ENSG00000136935	887.354	-0.0758693	0.0287094	-2.64267	0.00822563	0.165027	GOLGA1
ENSG00000175115	5513.72	-0.0761406	0.0298554	-2.55031	0.0107626	0.18249	PACS1
ENSG00000132323	986.852	-0.0765733	0.0247016	-3.09993	0.00193564	0.0918603	ILKAP
ENSG00000070047	2293.33	-0.0767048	0.0283211	-2.70839	0.00676098	0.15502	PHRF1
ENSG00000168137	4429.99	-0.0768841	0.0233536	-3.29218	0.000994149	0.0678983	SETD5
ENSG00000167522	6819.07	-0.0771183	0.0269301	-2.86364	0.00418798	0.126904	ANKRD11
ENSG00000168397	2411.57	-0.0772686	0.0254633	-3.0345	0.00240931	0.0987465	ATG4B
ENSG00000103091	1366.75	-0.0774512	0.0259604	-2.98344	0.0028503	0.10773	WDR59
ENSG00000141084	1449.11	-0.0774941	0.0280712	-2.76063	0.00576903	0.143236	RANBP10
ENSG00000167967	1122.27	-0.0778884	0.0308769	-2.52254	0.011651	0.188249	E4F1
ENSG00000157881	1001.68	-0.0780965	0.0277634	-2.81293	0.00490918	0.136437	PANK4
ENSG00000144029	1275.39	-0.0782087	0.0218204	-3.58421	0.000338106	0.0384869	MRPS5
ENSG00000139718	2779.58	-0.0784906	0.0283583	-2.76781	0.00564339	0.142453	SETD1B
ENSG00000145919	538.105	-0.0785002	0.0310042	-2.53192	0.0113439	0.187218	BOD1
ENSG00000108669	9452.74	-0.0787232	0.0255097	-3.08601	0.00202862	0.0928516	CYTH1
ENSG00000164916	2447.44	-0.0793891	0.0277203	-2.86393	0.00418421	0.126904	FOXK1
ENSG00000147421	976.845	-0.0794345	0.0315304	-2.5193	0.0117589	0.189063	HMBOX1
ENSG00000164327	3506.55	-0.0795968	0.0314627	-2.52988	0.0114102	0.187669	RICTOR
ENSG00000088038	1416.67	-0.0807152	0.0247968	-3.25507	0.00113365	0.071587	CNOT3
ENSG00000119707	6026.42	-0.0807906	0.0287347	-2.8116	0.00492951	0.136543	RBM25
ENSG00000155903	2577.09	-0.0808021	0.0305417	-2.64564	0.00815377	0.164191	RASA2
ENSG00000145817	1092.89	-0.0808049	0.0329162	-2.45487	0.0140937	0.199298	YIPF5
ENSG00000129197	911.516	-0.0808251	0.031804	-2.54135	0.0110424	0.184296	RPAIN
ENSG00000146083	4771.73	-0.0816737	0.0315387	-2.58964	0.00960773	0.175411	RNF44
ENSG00000166987	2184.6	-0.0817749	0.025303	-3.23182	0.00123005	0.0759317	MBD6
ENSG00000183604	1451.26	-0.0819231	0.0320889	-2.55301	0.0106797	0.182351	SMG1P5
ENSG00000160908	980.967	-0.0821682	0.0234261	-3.50755	0.000452252	0.0458441	ZNF394
ENSG00000160741	3092.94	-0.0824741	0.0286662	-2.87705	0.00401412	0.125679	CRTC2
ENSG00000163374	1560.03	-0.0826677	0.0291099	-2.83985	0.00451349	0.131314	YY1AP1
ENSG00000184887	706.45	-0.0829384	0.0335766	-2.47012	0.0135067	0.196247	BTBD6
ENSG00000061936	1996.01	-0.083056	0.0266477	-3.11682	0.00182813	0.0905915	SFSWAP
ENSG00000179364	1247.38	-0.0833917	0.0240189	-3.47192	0.000516746	0.0490272	PACS2
ENSG00000147121	420.775	-0.08371	0.0286913	-2.91761	0.00352729	0.117082	KRBOX4
ENSG00000165275	524.969	-0.0838339	0.0281813	-2.9748	0.00293178	0.109008	TRMT10B
ENSG00000167840	233.126	-0.0842603	0.0335349	-2.51261	0.0119841	0.190504	ZNF232
ENSG00000170037	875.559	-0.0843129	0.027054	-3.11646	0.00183034	0.0905915	CNTROB
ENSG00000141002	3154.71	-0.0845299	0.0267748	-3.15707	0.00159365	0.0857155	TCF25
ENSG00000177666	1852.51	-0.0847103	0.0313981	-2.69794	0.00697694	0.155466	PNPLA2
ENSG00000198393	827.651	-0.0848564	0.0305383	-2.77868	0.00545797	0.141622	ZNF26
ENSG00000171606	1343.95	-0.0848601	0.023068	-3.6787	0.000234426	0.0322504	ZNF274
ENSG00000169635	404.583	-0.0848993	0.0308966	-2.74786	0.00599863	0.146803	HIC2
ENSG00000003756	4497.9	-0.085202	0.0291232	-2.92557	0.00343828	0.116477	RBM5
ENSG00000143774	2245.84	-0.0855737	0.0318218	-2.68915	0.00716341	0.156248	GUK1
ENSG00000185361	862.366	-0.0856083	0.0336591	-2.54339	0.0109781	0.183788	TNFAIP8L1
ENSG00000162191	2465.76	-0.0856256	0.0298794	-2.86571	0.00416079	0.126904	UBXN1
ENSG00000214413	653.234	-0.0857074	0.0332328	-2.579	0.00990869	0.177197	BBIP1
ENSG00000170325	688.405	-0.0860944	0.0341359	-2.5221	0.0116655	0.188249	PRDM10
ENSG00000131051	10976.7	-0.0862677	0.0276179	-3.12362	0.00178643	0.0903132	RBM39
ENSG00000146830	4030.95	-0.0865238	0.021861	-3.9579	7.56103e-05	0.0183973	GIGYF1
ENSG00000076928	16233.9	-0.0869123	0.0333672	-2.60472	0.0091949	0.173621	ARHGEF1
ENSG00000113649	2095.18	-0.0871062	0.028455	-3.06119	0.00220459	0.0958474	TCERG1
ENSG00000198677	2248.09	-0.0873666	0.0262293	-3.33088	0.000865719	0.0620124	TTC37
ENSG00000102030	390.46	-0.0874889	0.0273899	-3.1942	0.00140218	0.0815888	NAA10
ENSG00000168096	409.511	-0.0875295	0.035339	-2.47685	0.0132547	0.195173	ANKS3
ENSG00000099992	475.121	-0.0877587	0.0323689	-2.7112	0.00670395	0.154699	TBC1D10A
ENSG00000083168	5933.82	-0.0883763	0.0300344	-2.94251	0.00325567	0.114633	KAT6A
ENSG00000148187	716.306	-0.0884344	0.0336874	-2.62515	0.00866119	0.16822	MRRF
ENSG00000133247	338.381	-0.0886108	0.0338805	-2.61539	0.00891251	0.170631	KMT5C
ENSG00000108848	7596.65	-0.0887167	0.0350867	-2.5285	0.011455	0.187697	LUC7L3
ENSG00000167978	36450.2	-0.0890028	0.0295744	-3.00946	0.00261714	0.10287	SRRM2
ENSG00000138468	2240.28	-0.0893076	0.03382	-2.64067	0.00827416	0.165655	SENP7
ENSG00000141503	3024.49	-0.0899604	0.0273961	-3.2837	0.00102455	0.0687124	MINK1
ENSG00000152795	9360.32	-0.0903059	0.0339015	-2.66377	0.00772694	0.160797	HNRNPDL
ENSG00000132376	1223.38	-0.0903719	0.0343693	-2.62944	0.00855267	0.167608	INPP5K
ENSG00000175662	801.247	-0.090615	0.0307076	-2.9509	0.00316853	0.113011	TOM1L2
ENSG00000099804	749.795	-0.0906166	0.0356335	-2.54302	0.0109899	0.183788	CDC34
ENSG00000149499	3620.28	-0.0909959	0.0289963	-3.13819	0.00169994	0.088443	EML3
ENSG00000135686	2516.58	-0.091003	0.0360643	-2.52335	0.0116242	0.188249	KLHL36
ENSG00000157353	637.154	-0.0911319	0.0260007	-3.50498	0.000456637	0.0458502	FUK
ENSG00000090581	1005.17	-0.0914083	0.0366045	-2.49719	0.0125183	0.193109	GNPTG
ENSG00000102125	1204.77	-0.0917584	0.0243644	-3.76608	0.00016583	0.0257572	TAZ
ENSG00000171467	2244.18	-0.0918432	0.0349537	-2.62757	0.00859971	0.167982	ZNF318
ENSG00000080546	646.27	-0.0918552	0.0369709	-2.48452	0.0129725	0.194809	SESN1
ENSG00000122779	721.292	-0.0919272	0.0323844	-2.83863	0.00453075	0.131617	TRIM24
ENSG00000134744	3922.17	-0.0920072	0.0305636	-3.01035	0.00260946	0.10287	TUT4
ENSG00000115977	3630.91	-0.0932589	0.0375304	-2.48489	0.0129592	0.194809	AAK1
ENSG00000221978	6345.58	-0.0932688	0.0304774	-3.06026	0.00221144	0.0959285	CCNL2
ENSG00000137497	5455.64	-0.0937649	0.0241132	-3.88852	0.000100856	0.0190263	NUMA1
ENSG00000068878	3334.27	-0.0938967	0.0280738	-3.34464	0.000823909	0.0608338	PSME4
ENSG00000008988	11499.9	-0.0944563	0.036343	-2.59902	0.00934892	0.174685	RPS20
ENSG00000111011	2913.99	-0.0951335	0.0351799	-2.7042	0.00684687	0.155332	RSRC2
ENSG00000165434	659.216	-0.0952869	0.038703	-2.462	0.0138164	0.197114	PGM2L1
ENSG00000167685	842.203	-0.095316	0.0388324	-2.45455	0.0141063	0.19933	ZNF444
ENSG00000090238	2943.8	-0.0954229	0.0386789	-2.46705	0.013623	0.196247	YPEL3
ENSG00000168067	2474.97	-0.0954524	0.0377854	-2.52617	0.0115314	0.188192	MAP4K2
ENSG00000175470	1353.34	-0.0955596	0.0278321	-3.43343	0.000595994	0.0533519	PPP2R2D
ENSG00000138834	4223.66	-0.0958331	0.0358205	-2.67537	0.00746467	0.159222	MAPK8IP3
ENSG00000101216	1050.06	-0.0959089	0.0320593	-2.99161	0.00277513	0.10626	GMEB2
ENSG00000163001	597.458	-0.0962592	0.0356632	-2.69912	0.00695229	0.155466	CFAP36
ENSG00000116754	8996.42	-0.0965287	0.0309031	-3.12359	0.00178657	0.0903132	SRSF11
ENSG00000213326	443.85	-0.097164	0.0391927	-2.47914	0.0131701	0.194936	RPS7P11
ENSG00000122678	940.483	-0.0972077	0.029736	-3.26903	0.00107918	0.0709383	POLM
ENSG00000162959	115.87	-0.0972308	0.0389382	-2.49705	0.012523	0.193109	MEMO1
ENSG00000067365	459.542	-0.0975718	0.0324082	-3.01072	0.00260632	0.10287	METTL22
ENSG00000104960	1283.98	-0.0980808	0.0278252	-3.52489	0.000423659	0.0441063	PTOV1
ENSG00000104872	1411.62	-0.0986455	0.0266228	-3.7053	0.000211143	0.030123	PIH1D1
ENSG00000170004	11717	-0.098894	0.0345367	-2.86345	0.00419059	0.126904	CHD3
ENSG00000089818	1000.05	-0.0990101	0.0338742	-2.92288	0.00346813	0.116573	NECAP1
ENSG00000111897	5870.63	-0.099214	0.0382308	-2.59513	0.00945548	0.174685	SERINC1
ENSG00000196531	7147.75	-0.0992794	0.0339417	-2.925	0.00344458	0.116477	NACA
ENSG00000132424	8828.62	-0.0995882	0.0380178	-2.61952	0.00880546	0.169313	PNISR
ENSG00000185246	1649	-0.0997558	0.0347889	-2.86746	0.00413777	0.126904	PRPF39
ENSG00000090621	2869.44	-0.0998709	0.0352972	-2.82942	0.00466319	0.132428	PABPC4
ENSG00000109920	6354.68	-0.100133	0.0329092	-3.04269	0.00234473	0.0980346	FNBP4
ENSG00000204564	381.884	-0.100175	0.0314232	-3.18792	0.001433	0.0820975	C6orf136
ENSG00000125633	2096.82	-0.10023	0.0389585	-2.57273	0.0100899	0.178895	CCDC93
ENSG00000152518	11577.9	-0.100279	0.0369859	-2.71129	0.00670228	0.154699	ZFP36L2
ENSG00000157933	2230.21	-0.101245	0.032176	-3.14659	0.00165188	0.0872888	SKI
ENSG00000186166	976.918	-0.101389	0.0380563	-2.66419	0.00771734	0.160797	CCDC84
ENSG00000133226	3128.03	-0.101487	0.0322917	-3.14284	0.0016732	0.0875702	SRRM1
ENSG00000146067	3232.39	-0.101509	0.0304809	-3.33025	0.000867693	0.0620124	FAM193B
ENSG00000080603	179.196	-0.101952	0.0369446	-2.75959	0.0057874	0.143456	SRCAP
ENSG00000130254	3433.19	-0.102225	0.0304086	-3.36171	0.000774605	0.0594378	SAFB2
ENSG00000113328	1896.82	-0.102243	0.0385857	-2.64977	0.00805459	0.163585	CCNG1
ENSG00000273559	1265.28	-0.102252	0.0376304	-2.71727	0.00658234	0.153838	CWC25
ENSG00000109065	903.05	-0.102394	0.0328884	-3.11337	0.00184961	0.0905915	NAT9
ENSG00000105193	12758.6	-0.102446	0.0402833	-2.54313	0.0109863	0.183788	RPS16
ENSG00000173214	311.878	-0.102683	0.0372683	-2.75524	0.0058649	0.144632	MFSD4B
ENSG00000225648	437.743	-0.102932	0.0387224	-2.65821	0.00785561	0.161817	SBDSP1
ENSG00000055483	2707.97	-0.102994	0.0413983	-2.48787	0.0128509	0.194428	USP36
ENSG00000126775	969.033	-0.103672	0.0312323	-3.31939	0.000902158	0.0634145	ATG14
ENSG00000197183	1125.14	-0.103715	0.040772	-2.54377	0.0109663	0.183788	NOL4L
ENSG00000131381	937.038	-0.103728	0.0257517	-4.02803	5.62464e-05	0.0163475	RBSN
ENSG00000184939	1133.15	-0.103842	0.0353657	-2.93623	0.00332223	0.115562	ZFP90
ENSG00000177082	202.44	-0.104044	0.0389983	-2.66791	0.00763256	0.160642	WDR73
ENSG00000114857	7181.08	-0.10411	0.0375044	-2.77595	0.00550407	0.141659	NKTR
ENSG00000261824	193.192	-0.104143	0.0415915	-2.50395	0.0122815	0.192275	LINC00662
ENSG00000197302	619.721	-0.104819	0.0304596	-3.44125	0.000579031	0.0528391	ZNF720
ENSG00000226084	3559.44	-0.104845	0.0397737	-2.63604	0.00838791	0.166205
ENSG00000198517	1108.91	-0.104983	0.0380683	-2.75776	0.0058198	0.143889	MAFK
ENSG00000153914	2911.33	-0.105446	0.0381232	-2.76593	0.00567608	0.142784	SREK1
ENSG00000141012	1009.12	-0.105643	0.0402611	-2.62395	0.00869162	0.168242	GALNS
ENSG00000077454	832.794	-0.10568	0.0292251	-3.61608	0.0002991	0.0368684	LRCH4
ENSG00000105722	1187.77	-0.10604	0.04177	-2.53866	0.0111277	0.184713	ERF
ENSG00000181524	455.668	-0.106089	0.0431933	-2.45615	0.0140434	0.199149	RPL24P4
ENSG00000007392	3280.32	-0.106777	0.0389047	-2.74457	0.00605899	0.147344	LUC7L
ENSG00000156232	1908.46	-0.107084	0.0412375	-2.59675	0.00941101	0.174685	WHAMM
ENSG00000173757	6267.44	-0.10718	0.0328951	-3.25825	0.00112103	0.0714937	STAT5B
ENSG00000089327	3412.33	-0.107828	0.0354693	-3.04003	0.00236554	0.0982504	FXYD5
ENSG00000005302	5194.42	-0.108155	0.038914	-2.77934	0.00544688	0.141622	MSL3
ENSG00000177954	14228.8	-0.108192	0.0429806	-2.51723	0.0118281	0.18921	RPS27
ENSG00000175727	4084.06	-0.108226	0.0308997	-3.50248	0.000460947	0.0459992	MLXIP
ENSG00000125772	4091.15	-0.108515	0.0430954	-2.51801	0.0118019	0.189105	GPCPD1
ENSG00000106610	196.662	-0.10855	0.0375347	-2.89199	0.00382814	0.122608	STAG3L4
ENSG00000126214	978.485	-0.109351	0.0300523	-3.6387	0.000274021	0.0354204	KLC1
ENSG00000185158	779.09	-0.109398	0.0280136	-3.90518	9.41553e-05	0.0190263	LRRC37B
ENSG00000013441	7525.51	-0.109962	0.0384669	-2.85861	0.004255	0.127613	CLK1
ENSG00000161013	1799.29	-0.11016	0.0441707	-2.49396	0.0126326	0.193338	MGAT4B
ENSG00000105698	3738.46	-0.110334	0.0311014	-3.54756	0.00038881	0.0413728	USF2
ENSG00000156931	1456.45	-0.110417	0.0343881	-3.21091	0.00132315	0.0786542	VPS8
ENSG00000133872	16732.7	-0.110458	0.0358274	-3.08306	0.00204884	0.0932875	SARAF
ENSG00000179335	2235.01	-0.110926	0.0355418	-3.12098	0.00180248	0.0905915	CLK3
ENSG00000004534	6020.81	-0.111546	0.0394086	-2.83051	0.00464739	0.132409	RBM6
ENSG00000147403	17740.6	-0.111591	0.0414164	-2.69438	0.00705198	0.155595	RPL10
ENSG00000279089	162.531	-0.111768	0.0452258	-2.47134	0.0134609	0.196247
ENSG00000180773	817.822	-0.111935	0.0453278	-2.46946	0.0135317	0.196247	SLC36A4
ENSG00000224631	3617.01	-0.112445	0.0446487	-2.51843	0.0117878	0.189063	RPS27AP16
ENSG00000116704	1007.4	-0.11269	0.0368482	-3.05822	0.00222655	0.0963102	SLC35D1
ENSG00000273329	96.0716	-0.112841	0.0441412	-2.55636	0.0105773	0.181169
ENSG00000260257	125.647	-0.113328	0.0441697	-2.56574	0.0102956	0.179613
ENSG00000131748	2193.35	-0.113456	0.0340738	-3.32972	0.000869332	0.0620124	STARD3
ENSG00000108515	279.473	-0.113838	0.0425664	-2.67436	0.00748722	0.159517	ENO3
ENSG00000163162	2390.11	-0.113844	0.0395163	-2.88095	0.00396483	0.125185	RNF149
ENSG00000162777	2536.16	-0.114217	0.0445518	-2.5637	0.0103563	0.179613	DENND2D
ENSG00000267121	3154.32	-0.115079	0.0407842	-2.82165	0.00477778	0.13375
ENSG00000148384	1045.63	-0.115277	0.0387269	-2.97666	0.00291408	0.108559	INPP5E
ENSG00000109929	638.177	-0.115604	0.046945	-2.46255	0.0137952	0.197103	SC5D
ENSG00000197912	3411.72	-0.115662	0.0298495	-3.87485	0.00010669	0.0190263	SPG7
ENSG00000039523	1651.56	-0.115682	0.039708	-2.91332	0.00357605	0.117936	RIPOR1
ENSG00000243716	12404.2	-0.116196	0.0416915	-2.78705	0.00531907	0.140312	NPIPB5
ENSG00000110721	313.109	-0.116351	0.0470483	-2.47301	0.0133982	0.195931	CHKA
ENSG00000171456	4997.04	-0.116359	0.0417489	-2.7871	0.00531816	0.140312	ASXL1
ENSG00000162650	365.33	-0.116554	0.0449144	-2.59503	0.00945829	0.174685	ATXN7L2
ENSG00000267100	482.961	-0.116908	0.0373946	-3.12633	0.00177006	0.0903132	ILF3-DT
ENSG00000165410	243.304	-0.116995	0.0445479	-2.62627	0.00863264	0.168154	CFL2
ENSG00000138433	1369.98	-0.117555	0.0462337	-2.54262	0.0110025	0.183788	CIR1
ENSG00000123329	3674.31	-0.11766	0.0455521	-2.58298	0.0097951	0.176357	ARHGAP9
ENSG00000002016	505.476	-0.117831	0.0357184	-3.29888	0.000970721	0.067248	RAD52
ENSG00000261609	431.508	-0.11817	0.0279359	-4.23005	2.33642e-05	0.00937489	GAN
ENSG00000129347	1434.37	-0.118282	0.0337493	-3.50473	0.000457073	0.0458502	KRI1
ENSG00000171858	4067.07	-0.118284	0.0470795	-2.51243	0.0119904	0.190504	RPS21
ENSG00000116337	945.044	-0.118502	0.0367099	-3.22806	0.00124631	0.076203	AMPD2
ENSG00000197976	4136.39	-0.118743	0.0366794	-3.23732	0.00120659	0.074723	AKAP17A
ENSG00000175482	341.972	-0.119484	0.031197	-3.82998	0.000128152	0.0220046	POLD4
ENSG00000178971	3919.09	-0.119599	0.0389327	-3.07194	0.00212671	0.0948463	CTC1
ENSG00000168010	2702.21	-0.119975	0.0356014	-3.36994	0.00075185	0.0584401	ATG16L2
ENSG00000108960	420.184	-0.120098	0.0465464	-2.58019	0.00987474	0.177099	MMD
ENSG00000205583	1046.7	-0.121677	0.0360633	-3.37398	0.000740904	0.0584401	STAG3L1
ENSG00000185864	3798.77	-0.122154	0.0470942	-2.59382	0.00949163	0.174769	NPIPB4
ENSG00000226360	157.154	-0.122162	0.0476888	-2.56164	0.0104179	0.180278	RPL10AP6
ENSG00000135048	3927.2	-0.122272	0.0494871	-2.47079	0.0134813	0.196247	CEMIP2
ENSG00000186866	1101.16	-0.122306	0.0349874	-3.49571	0.000472794	0.0464592	POFUT2
ENSG00000159496	142.211	-0.122651	0.0483173	-2.53845	0.0111346	0.184713	RGL4
ENSG00000068831	5657.51	-0.122682	0.0466862	-2.6278	0.00859401	0.167982	RASGRP2
ENSG00000198821	4974.02	-0.122876	0.0493497	-2.4899	0.012778	0.193783	CD247
ENSG00000164663	366.488	-0.122929	0.0408412	-3.00993	0.00261304	0.10287	USP49
ENSG00000157796	1247.05	-0.123067	0.0434686	-2.83116	0.0046379	0.132409	WDR19
ENSG00000117139	1968.17	-0.123114	0.0493579	-2.49431	0.0126203	0.193338	KDM5B
ENSG00000185324	1762.48	-0.123382	0.0341855	-3.60918	0.000307161	0.0369205	CDK10
ENSG00000106404	750.961	-0.124053	0.0420342	-2.95124	0.00316498	0.113011	CLDN15
ENSG00000073417	808.866	-0.124252	0.04547	-2.73262	0.00628336	0.150502	PDE8A
ENSG00000179889	2518.33	-0.124928	0.040442	-3.08906	0.00200793	0.0922975	PDXDC1
ENSG00000011132	1246.42	-0.124997	0.0336453	-3.71515	0.000203083	0.0293055	APBA3
ENSG00000165689	1187.35	-0.125054	0.0316679	-3.94892	7.85049e-05	0.0184327	ENTR1
ENSG00000129925	1758.9	-0.125303	0.0411494	-3.04509	0.00232611	0.0978543	TMEM8A
ENSG00000159086	1931.2	-0.125463	0.0389404	-3.22193	0.00127329	0.0771182	PAXBP1
ENSG00000185043	1467.68	-0.127257	0.0371542	-3.42509	0.000614588	0.0533519	CIB1
ENSG00000261505	281.234	-0.12756	0.0471271	-2.70673	0.00679504	0.155174
ENSG00000143924	5374.5	-0.12768	0.0398497	-3.20403	0.00135519	0.0795763	EML4
ENSG00000279759	166.152	-0.127849	0.0465409	-2.74703	0.00601372	0.146985
ENSG00000139946	440.44	-0.128149	0.0399295	-3.20939	0.00133019	0.0787709	PELI2
ENSG00000196365	1662.04	-0.128554	0.0520069	-2.47186	0.0134411	0.196118	LONP1
ENSG00000108557	972.295	-0.128749	0.0370449	-3.47549	0.000509914	0.0488605	RAI1
ENSG00000268030	61.4938	-0.128824	0.0516444	-2.49443	0.0126159	0.193338
ENSG00000140455	1724.49	-0.128889	0.0326316	-3.94981	7.82144e-05	0.0184327	USP3
ENSG00000279453	176.344	-0.129114	0.0433317	-2.97967	0.00288556	0.10805
ENSG00000137817	1695.17	-0.129985	0.0333659	-3.89576	9.78913e-05	0.0190263	PARP6
ENSG00000205903	2172.41	-0.130432	0.0405273	-3.21838	0.00128919	0.0773481	ZNF316
ENSG00000132199	770.829	-0.130566	0.0525546	-2.48439	0.0129772	0.194809	ENOSF1
ENSG00000070718	795.52	-0.130813	0.0469425	-2.78666	0.00532545	0.140312	AP3M2
ENSG00000163516	2622.09	-0.132245	0.0533206	-2.48018	0.0131316	0.194936	ANKZF1
ENSG00000274265	327.844	-0.132475	0.0490636	-2.70007	0.00693255	0.155466
ENSG00000102225	1354.91	-0.132483	0.0452649	-2.92684	0.00342421	0.116477	CDK16
ENSG00000187605	2002.21	-0.133118	0.0380597	-3.49762	0.000469437	0.0463659	TET3
ENSG00000198563	7274.25	-0.133593	0.0463596	-2.88167	0.00395572	0.125102	DDX39B
ENSG00000006459	3745.96	-0.134028	0.0512558	-2.61488	0.00892589	0.170718	KDM7A
ENSG00000107863	852.846	-0.135325	0.0512922	-2.63832	0.00833172	0.165774	ARHGAP21
ENSG00000139636	1837.22	-0.135367	0.0334155	-4.05102	5.0994e-05	0.0157427	LMBR1L
ENSG00000248124	1045.88	-0.135626	0.0476143	-2.84842	0.00439363	0.12976	RRN3P1
ENSG00000144560	427.201	-0.135778	0.0536921	-2.52883	0.0114442	0.187697	VGLL4
ENSG00000214174	186.894	-0.136134	0.0498513	-2.7308	0.00631813	0.150502	AMZ2P1
ENSG00000157873	4881.05	-0.136304	0.0317942	-4.28706	1.81056e-05	0.00817273	TNFRSF14
ENSG00000139597	1211.87	-0.136721	0.0412803	-3.31201	0.000926279	0.0648732	N4BP2L1
ENSG00000102886	215.93	-0.137378	0.0470891	-2.9174	0.00352964	0.117082	GDPD3
ENSG00000185000	817.012	-0.137869	0.03148	-4.37956	1.18919e-05	0.00723742	DGAT1
ENSG00000143178	140.814	-0.138789	0.0545256	-2.54539	0.0109156	0.18345	TBX19
ENSG00000172578	2837.22	-0.138999	0.0446119	-3.11573	0.00183492	0.0905915	KLHL6
ENSG00000245904	187.02	-0.140569	0.0567909	-2.4752	0.0133162	0.195557
ENSG00000137154	25736.2	-0.141023	0.0491152	-2.87127	0.0040883	0.126187	RPS6
ENSG00000122477	59.2417	-0.141409	0.0554754	-2.54904	0.0108019	0.182496	LRRC39
ENSG00000278867	101.677	-0.141642	0.0499806	-2.83393	0.00459787	0.132369
ENSG00000117020	1336.77	-0.14203	0.0497409	-2.85539	0.00429834	0.127954	AKT3
ENSG00000213860	1457.94	-0.142904	0.0538647	-2.65302	0.00797758	0.163108	RPL21P75
ENSG00000233024	1482.19	-0.143486	0.0467101	-3.07185	0.00212739	0.0948463	NPIPA9
ENSG00000187801	111.939	-0.144635	0.0546093	-2.64855	0.0080838	0.163716	ZFP69B
ENSG00000102606	2991.02	-0.145971	0.0413354	-3.53138	0.000413399	0.0435086	ARHGEF7
ENSG00000276570	45.9805	-0.14658	0.0546123	-2.68402	0.00727424	0.156714
ENSG00000185989	3995.48	-0.147484	0.0370389	-3.98186	6.83777e-05	0.0173069	RASA3
ENSG00000100100	6930.24	-0.147998	0.055198	-2.68122	0.00733536	0.157326	PIK3IP1
ENSG00000008256	510.899	-0.14832	0.0585602	-2.53277	0.0113164	0.186925	CYTH3
ENSG00000205609	5568.85	-0.148596	0.0548392	-2.70966	0.00673518	0.154815	EIF3CL
ENSG00000108474	479.094	-0.149441	0.0455348	-3.28192	0.00103104	0.0687124	PIGL
ENSG00000135299	89.3642	-0.149464	0.0601006	-2.4869	0.012886	0.194428	ANKRD6
ENSG00000223509	1340.47	-0.150312	0.0589279	-2.55078	0.0107484	0.18249
ENSG00000197375	275.238	-0.151227	0.0570385	-2.65131	0.00801813	0.16356	SLC22A5
ENSG00000234742	44.7938	-0.151627	0.0601338	-2.5215	0.0116856	0.188339
ENSG00000114796	2319.32	-0.151654	0.0376727	-4.02557	5.68381e-05	0.0163475	KLHL24
ENSG00000111644	208.686	-0.151702	0.05694	-2.66425	0.00771604	0.160797	ACRBP
ENSG00000135503	774.302	-0.152511	0.0614196	-2.4831	0.0130246	0.194913	ACVR1B
ENSG00000105643	5785.76	-0.152574	0.0438468	-3.47971	0.000501962	0.048374	ARRDC2
ENSG00000127415	443.145	-0.152706	0.0605503	-2.52196	0.0116703	0.188249	IDUA
ENSG00000176155	991.993	-0.152847	0.0355032	-4.30516	1.66868e-05	0.0078942	CCDC57
ENSG00000117000	1623.33	-0.155052	0.0609744	-2.54291	0.0109934	0.183788	RLF
ENSG00000268516	85.6461	-0.155211	0.054344	-2.85608	0.00428912	0.127954
ENSG00000164406	81.4407	-0.155816	0.0553268	-2.81628	0.00485831	0.135414	LEAP2
ENSG00000239569	106.126	-0.15602	0.0571318	-2.73088	0.00631658	0.150502	KMT2E-AS1
ENSG00000136732	1481.14	-0.156068	0.0481015	-3.24455	0.00117637	0.0733233	GYPC
ENSG00000107957	1355.54	-0.156214	0.0593086	-2.63391	0.0084408	0.166227	SH3PXD2A
ENSG00000270060	46.6717	-0.156919	0.0519287	-3.02182	0.00251261	0.100819
ENSG00000270871	114.148	-0.157616	0.0574811	-2.74206	0.00610558	0.147916
ENSG00000100058	295.985	-0.158389	0.0558241	-2.83729	0.00454977	0.131971	CRYBB2P1
ENSG00000242861	229.697	-0.158798	0.0615913	-2.57826	0.00992995	0.177248
ENSG00000258102	89.074	-0.159535	0.0584286	-2.73042	0.00632534	0.150502	MAP1LC3B2
ENSG00000219665	181.885	-0.160425	0.0549216	-2.92098	0.00348929	0.116876	ZNF433-AS1
ENSG00000169246	3458.35	-0.160464	0.0476538	-3.36729	0.000759101	0.058716	NPIPB3
ENSG00000260260	110.761	-0.16049	0.0619246	-2.5917	0.00955028	0.175346	SNHG19
ENSG00000089060	1712.86	-0.160779	0.0442565	-3.63289	0.000280266	0.0358473	SLC8B1
ENSG00000260051	104.404	-0.160851	0.0569302	-2.82541	0.00472206	0.132428
ENSG00000214900	297.563	-0.161072	0.0535874	-3.00578	0.00264904	0.10328	LINC01588
ENSG00000246451	241.168	-0.161386	0.0480849	-3.35628	0.000789972	0.0598294
ENSG00000007944	651.087	-0.161412	0.0579735	-2.78424	0.00536536	0.140603	MYLIP
ENSG00000258704	58.5182	-0.161667	0.0656739	-2.46166	0.0138296	0.197156	SRP54-AS1
ENSG00000070756	50922.7	-0.161909	0.0526893	-3.07289	0.00211995	0.0948463	PABPC1
ENSG00000164292	473.802	-0.162264	0.0654449	-2.4794	0.0131602	0.194936	RHOBTB3
ENSG00000126870	462.603	-0.16251	0.0605637	-2.68328	0.00729038	0.156886	WDR60
ENSG00000275557	356.028	-0.163149	0.063342	-2.57568	0.0100043	0.178244
ENSG00000088256	176.906	-0.163437	0.0628383	-2.60091	0.0092977	0.174682	GNA11
ENSG00000268947	32.4836	-0.163607	0.0639351	-2.55895	0.0104988	0.181027
ENSG00000175265	8040.83	-0.164002	0.0529689	-3.09619	0.00196026	0.0918603	GOLGA8A
ENSG00000141562	1879.92	-0.164199	0.0524483	-3.13069	0.00174398	0.0895708	NARF
ENSG00000260279	298.168	-0.164636	0.0596185	-2.76149	0.00575377	0.143236
ENSG00000122085	1622.46	-0.164936	0.0443202	-3.72147	0.000198064	0.0291199	MTERF4
ENSG00000279192	132.668	-0.165126	0.0559579	-2.9509	0.00316848	0.113011	PWAR5
ENSG00000185950	682.096	-0.165771	0.0663021	-2.50023	0.0124111	0.192308	IRS2
ENSG00000226210	1219.15	-0.165918	0.0628205	-2.64114	0.00826271	0.165598	WASH8P
ENSG00000188026	105.971	-0.16611	0.0630051	-2.63645	0.00837776	0.166205	RILPL1
ENSG00000127589	103.447	-0.166412	0.0617808	-2.69358	0.00706881	0.155595	TUBBP1
ENSG00000111837	66.0252	-0.166471	0.0672821	-2.47423	0.0133525	0.195861	MAK
ENSG00000285669	137.739	-0.166699	0.0553113	-3.01382	0.00257977	0.10287
ENSG00000004660	437.67	-0.167236	0.0603687	-2.77025	0.00560136	0.142044	CAMKK1
ENSG00000272750	57.2642	-0.167588	0.0616899	-2.71663	0.00659507	0.153838
ENSG00000250539	50.7854	-0.167929	0.0630383	-2.66392	0.00772368	0.160797	KRT8P33
ENSG00000179743	105.453	-0.168231	0.0463236	-3.63165	0.000281616	0.0358473
ENSG00000124766	835.975	-0.168235	0.0635491	-2.64732	0.00811327	0.164064	SOX4
ENSG00000279833	155.42	-0.16863	0.0555415	-3.03611	0.00239654	0.0986269
ENSG00000110852	1477.99	-0.169045	0.0535204	-3.15852	0.00158574	0.0857155	CLEC2B
ENSG00000139880	79.589	-0.169464	0.0685203	-2.47319	0.0133913	0.195931	CDH24
ENSG00000179859	117.886	-0.169474	0.056057	-3.02324	0.00250083	0.100789	RNF227
ENSG00000165995	77.4266	-0.169829	0.0585252	-2.90181	0.00371019	0.121392	CACNB2
ENSG00000151929	587.788	-0.169961	0.0683744	-2.48574	0.0129281	0.194809	BAG3
ENSG00000168758	869.418	-0.170337	0.0641007	-2.65733	0.00787615	0.162053	SEMA4C
ENSG00000166532	964.871	-0.171201	0.0577501	-2.96451	0.00303167	0.110587	RIMKLB
ENSG00000115548	3613.02	-0.171453	0.0626669	-2.73594	0.0062203	0.149754	KDM3A
ENSG00000091592	6577.07	-0.171732	0.0427522	-4.01691	5.89661e-05	0.0163475	NLRP1
ENSG00000226450	45.3332	-0.172052	0.0697141	-2.46796	0.0135885	0.196247	CYP2D8P
ENSG00000116679	6349.54	-0.173043	0.0601506	-2.87684	0.00401682	0.125679	IVNS1ABP
ENSG00000213648	79.4649	-0.174285	0.0641434	-2.71711	0.00658547	0.153838	SULT1A4
ENSG00000154229	942.997	-0.174397	0.0626818	-2.78226	0.00539822	0.14088	PRKCA
ENSG00000275437	34.9356	-0.174421	0.0674849	-2.5846	0.0097493	0.176357
ENSG00000251562	80436.9	-0.174868	0.0634198	-2.7573	0.00582803	0.143907	MALAT1
ENSG00000087903	298.117	-0.174993	0.0684109	-2.55797	0.0105284	0.18109	RFX2
ENSG00000261740	86.1001	-0.175101	0.0650956	-2.6899	0.00714725	0.156184	BOLA2-SMG1P6
ENSG00000260280	98.5329	-0.175494	0.0591792	-2.96546	0.00302231	0.11056	SLX1B-SULT1A4
ENSG00000130844	878.058	-0.175834	0.0515386	-3.41169	0.000645603	0.0549808	ZNF331
ENSG00000231551	287.042	-0.176158	0.0635365	-2.77254	0.00556204	0.141888
ENSG00000272449	123.423	-0.176723	0.0623089	-2.83624	0.00456479	0.132009
ENSG00000223804	350.364	-0.177259	0.066226	-2.67658	0.00743785	0.159222
ENSG00000276182	61.1026	-0.177984	0.0619071	-2.87501	0.00404016	0.125865
ENSG00000260231	244.2	-0.178341	0.0710986	-2.50836	0.0121292	0.191482	KDM7A-DT
ENSG00000260317	50.5726	-0.179018	0.0703088	-2.54617	0.0108911	0.183359
ENSG00000142303	950.007	-0.179373	0.0717397	-2.50033	0.0124079	0.192308	ADAMTS10
ENSG00000118369	542.938	-0.179664	0.0618083	-2.9068	0.00365147	0.119808	USP35
ENSG00000255857	29.977	-0.181803	0.0670495	-2.71148	0.00669844	0.154699	PXN-AS1
ENSG00000278959	49.9876	-0.182596	0.0716229	-2.54941	0.0107904	0.18249
ENSG00000257242	139.829	-0.182604	0.0683842	-2.67026	0.00757926	0.160414	LINC01619
ENSG00000272918	70.0957	-0.183457	0.0598429	-3.06564	0.00217204	0.0953533
ENSG00000183889	1077.56	-0.183566	0.0471725	-3.89137	9.96813e-05	0.0190263
ENSG00000262766	27.3894	-0.184925	0.0728289	-2.53918	0.0111114	0.184713
ENSG00000175886	161.314	-0.185009	0.0733455	-2.52244	0.0116545	0.188249	RPL7AP66
ENSG00000132510	5245.42	-0.185036	0.0699103	-2.64677	0.00812653	0.164064	KDM6B
ENSG00000053438	39.2718	-0.18532	0.0721953	-2.56693	0.0102603	0.17939	NNAT
ENSG00000268996	31.535	-0.186311	0.0668841	-2.78558	0.00534314	0.140394	MAN1B1-DT
ENSG00000170949	1484.11	-0.187033	0.0551003	-3.39441	0.000687762	0.0573433	ZNF160
ENSG00000225931	50.1361	-0.187907	0.0742698	-2.53006	0.0114042	0.187669
ENSG00000173727	113.772	-0.188199	0.0748789	-2.51338	0.0119581	0.190504
ENSG00000197599	214.309	-0.189003	0.0559701	-3.37686	0.000733184	0.0584401	CCDC154
ENSG00000279917	53.8252	-0.189841	0.074492	-2.54848	0.0108195	0.182632
ENSG00000146722	50.6486	-0.190168	0.0699043	-2.72041	0.0065202	0.153429
ENSG00000245970	38.4492	-0.191631	0.0717128	-2.6722	0.00753565	0.160018
ENSG00000213204	26.9313	-0.191692	0.0763395	-2.51104	0.0120375	0.190504
ENSG00000279716	97.2482	-0.191876	0.0515066	-3.72528	0.000195097	0.0289044
ENSG00000279738	77.4698	-0.193172	0.052782	-3.6598	0.000252409	0.0340407
ENSG00000244687	165.958	-0.193365	0.0542611	-3.56359	0.000365813	0.0400316	UBE2V1
ENSG00000228956	810.379	-0.193959	0.060887	-3.18555	0.00144479	0.0823274	SATB1-AS1
ENSG00000181016	63.6759	-0.194575	0.0791145	-2.45942	0.0139163	0.198246	LSMEM1
ENSG00000231409	42.5742	-0.194585	0.0767507	-2.53529	0.0112355	0.185907
ENSG00000225447	31.7539	-0.196882	0.0785909	-2.50515	0.0122401	0.192131	RPS15AP10
ENSG00000223891	185.829	-0.197639	0.0530221	-3.72748	0.000193403	0.0289044	OSER1-DT
ENSG00000113971	343.121	-0.197978	0.0484711	-4.08445	4.41805e-05	0.0149283	NPHP3
ENSG00000274070	67.3613	-0.199283	0.0751992	-2.65007	0.00804745	0.163585	CASTOR2
ENSG00000279700	42.6585	-0.20029	0.0704027	-2.84491	0.00444234	0.129844
ENSG00000008128	173.869	-0.200475	0.0665503	-3.01238	0.00259205	0.10287	CDK11A
ENSG00000231105	31.7688	-0.201221	0.0777762	-2.58718	0.00967649	0.175654
ENSG00000242294	407.957	-0.201298	0.0571027	-3.5252	0.000423163	0.0441063	STAG3L5P
ENSG00000215908	2130.72	-0.201887	0.0612836	-3.29431	0.00098663	0.0677809	CROCCP2
ENSG00000099194	800.72	-0.202171	0.0735429	-2.74902	0.00597743	0.14647	SCD
ENSG00000173991	141.119	-0.202323	0.0567711	-3.56383	0.000365479	0.0400316	TCAP
ENSG00000279155	40.1341	-0.203731	0.0736612	-2.76578	0.00567875	0.142784
ENSG00000072310	1330.48	-0.204014	0.0610288	-3.34291	0.000829046	0.0608338	SREBF1
ENSG00000188897	160.993	-0.20407	0.071942	-2.8366	0.00455974	0.132009
ENSG00000263657	29.732	-0.205982	0.0827171	-2.4902	0.012767	0.193769
ENSG00000178038	355.752	-0.206362	0.0829844	-2.48676	0.0128912	0.194428	ALS2CL
ENSG00000270589	104.225	-0.206835	0.0716568	-2.88646	0.00389599	0.123823
ENSG00000278949	56.264	-0.2069	0.0620395	-3.33498	0.00085306	0.0615354
ENSG00000272758	42.2793	-0.207006	0.0604071	-3.42685	0.000610627	0.0533519
ENSG00000279744	80.4333	-0.207721	0.0809154	-2.56714	0.0102541	0.17939
ENSG00000144283	474.246	-0.207742	0.0603894	-3.44005	0.000581614	0.0528391	PKP4
ENSG00000272375	26.4787	-0.207927	0.0846633	-2.45593	0.0140521	0.199149
ENSG00000099977	64.5112	-0.20799	0.0725639	-2.8663	0.004153	0.126904	DDT
ENSG00000269737	206.019	-0.208508	0.0768367	-2.71366	0.0066545	0.154603
ENSG00000115896	694.819	-0.208722	0.0677652	-3.08008	0.00206943	0.0937817	PLCL1
ENSG00000279159	244.923	-0.210596	0.0551765	-3.81677	0.000135212	0.0224499
ENSG00000168056	2309.13	-0.210727	0.0821171	-2.56618	0.0102826	0.17955	LTBP3
ENSG00000178297	39.3856	-0.211874	0.0814725	-2.60056	0.00930729	0.174682	TMPRSS9
ENSG00000100068	285	-0.212211	0.0777644	-2.72889	0.00635473	0.150544	LRP5L
ENSG00000226396	38.609	-0.212555	0.0845141	-2.51502	0.0119024	0.190241
ENSG00000120896	809.862	-0.213604	0.0807996	-2.64363	0.00820229	0.16473	SORBS3
ENSG00000285863	49.1735	-0.213894	0.0699758	-3.05668	0.00223804	0.0963102
ENSG00000151846	137.68	-0.214119	0.061537	-3.47951	0.000502326	0.048374	PABPC3
ENSG00000102760	1411.07	-0.214163	0.0807167	-2.65327	0.00797169	0.163108	RGCC
ENSG00000164684	520.093	-0.21427	0.0762084	-2.81163	0.00492909	0.136543	ZNF704
ENSG00000226742	105.87	-0.216503	0.0705538	-3.06863	0.00215045	0.0953533	HSBP1L1
ENSG00000272529	49.0869	-0.217535	0.0813928	-2.67265	0.00752541	0.160018
ENSG00000211793	76.3371	-0.218913	0.0847548	-2.58289	0.00979759	0.176357	TRAV9-2
ENSG00000114812	369.716	-0.219474	0.0855776	-2.56462	0.0103289	0.179613	VIPR1
ENSG00000234222	29.06	-0.220582	0.088381	-2.49581	0.012567	0.193323	LIX1L-AS1
ENSG00000272034	29.8346	-0.222346	0.08241	-2.69805	0.00697471	0.155466	SNORD14A
ENSG00000231064	23.5977	-0.222846	0.080113	-2.78164	0.00540843	0.140956
ENSG00000168487	292.196	-0.223695	0.084381	-2.65101	0.00802513	0.16356	BMP1
ENSG00000179038	24.1064	-0.224136	0.0849353	-2.6389	0.00831756	0.165669
ENSG00000228060	22.5871	-0.22469	0.0873343	-2.57275	0.0100893	0.178895	PABPC4-AS1
ENSG00000277277	42.9843	-0.224995	0.0771697	-2.91559	0.00355018	0.117284	FAM243B
ENSG00000260774	32.0524	-0.225207	0.0812427	-2.77203	0.00557071	0.141888
ENSG00000279662	45.9259	-0.22533	0.0820741	-2.74544	0.00604291	0.147138
ENSG00000110693	31.2145	-0.225847	0.0715185	-3.15788	0.00158918	0.0857155	SOX6
ENSG00000215493	29.7749	-0.226389	0.0872916	-2.59348	0.00950103	0.174775
ENSG00000279649	77.3741	-0.226866	0.0763093	-2.97297	0.00294929	0.109447
ENSG00000230565	32.2547	-0.22695	0.0672523	-3.3746	0.000739234	0.0584401	ZNF32-AS2
ENSG00000253982	172.364	-0.227268	0.079427	-2.86135	0.00421846	0.127248
ENSG00000227398	32.7094	-0.227606	0.0905367	-2.51396	0.0119384	0.1905	KIF9-AS1
ENSG00000284738	27.0719	-0.229191	0.0747989	-3.06409	0.00218332	0.0953533
ENSG00000272153	36.6617	-0.229461	0.0780897	-2.93843	0.00329882	0.1151
ENSG00000105088	148.435	-0.229982	0.0724757	-3.17323	0.00150755	0.0839449	OLFM2
ENSG00000165591	326.387	-0.232028	0.093834	-2.47275	0.0134079	0.195931	FAAH2
ENSG00000131471	33.6111	-0.232405	0.0772971	-3.00664	0.00264149	0.103195	AOC3
ENSG00000279825	452.786	-0.232447	0.0808867	-2.87374	0.00405649	0.126013
ENSG00000258366	26.1836	-0.232648	0.0768641	-3.02674	0.00247209	0.100448	RTEL1
ENSG00000254162	32.3857	-0.23271	0.0817142	-2.84785	0.00440161	0.12976
ENSG00000247363	20.2491	-0.233061	0.0917533	-2.54009	0.0110825	0.184645
ENSG00000128536	138.674	-0.234372	0.0708865	-3.30631	0.000945346	0.0659687	CDHR3
ENSG00000236977	34.9566	-0.234585	0.0921069	-2.54687	0.0108692	0.183151	ANKRD44-IT1
ENSG00000260436	16.1659	-0.234699	0.0945672	-2.48183	0.0130711	0.194933
ENSG00000186854	861.53	-0.235383	0.0865276	-2.72033	0.00652177	0.153429	TRABD2A
ENSG00000216809	25.8597	-0.23564	0.0863893	-2.72766	0.00637861	0.150924
ENSG00000189136	33.3398	-0.236434	0.0935074	-2.52851	0.0114548	0.187697	UBE2Q2P1
ENSG00000244733	64.052	-0.236692	0.079398	-2.98109	0.00287228	0.107985
ENSG00000273160	33.038	-0.237498	0.0916527	-2.59128	0.00956193	0.175393
ENSG00000226221	400.879	-0.23803	0.0701069	-3.39524	0.000685685	0.0573433	RPL26P19
ENSG00000271347	27.4553	-0.241717	0.0770745	-3.13615	0.00171182	0.088443
ENSG00000282980	21.9447	-0.242323	0.0942721	-2.57046	0.0101563	0.179024
ENSG00000279103	16.6311	-0.244701	0.0957891	-2.55458	0.0106316	0.18169
ENSG00000276115	21.9882	-0.245652	0.098717	-2.48845	0.0128301	0.19442
ENSG00000228107	33.3217	-0.245799	0.0914564	-2.68761	0.00719661	0.156275
ENSG00000279026	35.1745	-0.246586	0.082072	-3.0045	0.00266015	0.103504
ENSG00000279283	42.0959	-0.247338	0.0765756	-3.22998	0.001238	0.0761784
ENSG00000232611	65.221	-0.247943	0.069382	-3.57359	0.000352118	0.039429
ENSG00000182196	19.8457	-0.248085	0.0765695	-3.24	0.00119531	0.0742633	ARL6IP4
ENSG00000275413	16.0866	-0.248793	0.100382	-2.47845	0.0131953	0.194936
ENSG00000258181	29.5514	-0.249005	0.0976734	-2.54936	0.0107921	0.18249
ENSG00000260698	27.3555	-0.249031	0.0821766	-3.03044	0.00244198	0.0996451
ENSG00000274020	645.311	-0.250109	0.0714442	-3.50075	0.000463947	0.0460599	LINC01138
ENSG00000183696	3067.18	-0.251632	0.100585	-2.50169	0.0123602	0.192308	UPP1
ENSG00000112655	318.913	-0.252276	0.0811632	-3.10825	0.00188196	0.0911531	PTK7
ENSG00000225484	723.7	-0.252876	0.064421	-3.92537	8.65969e-05	0.0190263	NUTM2B-AS1
ENSG00000215244	107.335	-0.253078	0.0926996	-2.73009	0.00633174	0.150502
ENSG00000085465	71.6912	-0.253416	0.0756372	-3.35041	0.000806907	0.0602366	OVGP1
ENSG00000265194	19.7963	-0.253555	0.097739	-2.5942	0.0094811	0.174743
ENSG00000266402	21.1357	-0.255333	0.102062	-2.50174	0.0123586	0.192308	SNHG25
ENSG00000236861	39.4221	-0.255495	0.0698177	-3.65946	0.000252743	0.0340407
ENSG00000272288	22.2894	-0.255629	0.0891128	-2.8686	0.00412293	0.126904
ENSG00000259298	17.7973	-0.256218	0.0991198	-2.58493	0.00973982	0.176357
ENSG00000214894	102.319	-0.25831	0.103627	-2.49268	0.0126784	0.193338	LINC00243
ENSG00000261064	96.7459	-0.258566	0.0715885	-3.61183	0.000304041	0.0369205	LINC02256
ENSG00000222018	30.5042	-0.258576	0.0867912	-2.97929	0.00288919	0.10805	FAM243A
ENSG00000183506	1754.02	-0.258599	0.0659603	-3.92052	8.83591e-05	0.0190263	PI4KAP2
ENSG00000231628	20.2202	-0.258877	0.0871804	-2.96943	0.00298349	0.10987
ENSG00000173530	438.283	-0.25965	0.0817159	-3.17748	0.00148563	0.0831777	TNFRSF10D
ENSG00000228477	51.1402	-0.260575	0.0960968	-2.71159	0.00669611	0.154699
ENSG00000248099	86.5127	-0.260609	0.0889019	-2.93142	0.00337419	0.115639	INSL3
ENSG00000211714	83.529	-0.260798	0.0968589	-2.69255	0.00709077	0.1559	TRBV7-3
ENSG00000047662	20.4236	-0.261131	0.0857577	-3.04498	0.00232696	0.0978543	FAM184B
ENSG00000268201	23.2106	-0.261398	0.0933468	-2.80029	0.00510562	0.138085
ENSG00000277778	33.5615	-0.261471	0.088554	-2.95267	0.00315037	0.113011	PGM5P2
ENSG00000172771	39.2169	-0.261888	0.0948666	-2.76059	0.00576963	0.143236	EFCAB12
ENSG00000251000	21.2221	-0.261889	0.0911978	-2.87166	0.00408318	0.126187
ENSG00000131797	609.665	-0.265735	0.0699036	-3.80144	0.000143856	0.0230888	CLUHP3
ENSG00000169750	16.437	-0.266622	0.10746	-2.48113	0.0130967	0.194933	RAC3
ENSG00000235958	18.2591	-0.267173	0.0907567	-2.94384	0.00324167	0.114399	UBOX5-AS1
ENSG00000233264	18.016	-0.267178	0.0988282	-2.70346	0.00686221	0.155466
ENSG00000278709	30.6068	-0.267433	0.108614	-2.46224	0.0138074	0.197114	NKILA
ENSG00000152284	42.3165	-0.267731	0.0702659	-3.81026	0.000138822	0.0226585	TCF7L1
ENSG00000273343	20.4872	-0.268519	0.101104	-2.65586	0.00791075	0.162432
ENSG00000256742	16.2374	-0.269852	0.105287	-2.56302	0.0103766	0.179724
ENSG00000259248	70.1947	-0.271731	0.0874435	-3.1075	0.00188678	0.0911531	USP3-AS1
ENSG00000249685	34.9863	-0.272892	0.0897716	-3.03985	0.00236699	0.0982504
ENSG00000267136	17.5742	-0.273301	0.105879	-2.58126	0.00984404	0.176862
ENSG00000224003	22.3246	-0.27341	0.0973563	-2.80835	0.00497963	0.137011	YES1P1
ENSG00000226945	28.3848	-0.273428	0.0902152	-3.03085	0.00243869	0.0996451
ENSG00000276178	14.245	-0.273787	0.104096	-2.63013	0.00853523	0.167572
ENSG00000154025	56.5019	-0.273855	0.0812698	-3.3697	0.0007525	0.0584401	SLC5A10
ENSG00000223704	86.0693	-0.275565	0.112345	-2.45285	0.0141728	0.19983	LINC01422
ENSG00000163806	40.3178	-0.275678	0.073998	-3.72548	0.000194947	0.0289044	SPDYA
ENSG00000279762	15.0243	-0.276091	0.0991627	-2.78422	0.0053657	0.140603
ENSG00000172426	18.673	-0.280714	0.089209	-3.1467	0.00165121	0.0872888	RSPH9
ENSG00000280407	38.9961	-0.281179	0.0656144	-4.28533	1.82465e-05	0.00817273
ENSG00000238018	38.807	-0.281651	0.0889096	-3.16783	0.00153581	0.0847554
ENSG00000285560	14.5197	-0.282459	0.109318	-2.58383	0.00977092	0.176357
ENSG00000207034	19.0228	-0.283877	0.102239	-2.77661	0.00549282	0.141622
ENSG00000131188	54.1222	-0.284518	0.0931022	-3.05598	0.00224329	0.0963102	PRR7
ENSG00000226891	20.0229	-0.286199	0.106703	-2.68221	0.0073138	0.157192	LINC01359
ENSG00000280047	57.3619	-0.286286	0.087567	-3.26934	0.001078	0.0709383
ENSG00000211886	19.779	-0.286618	0.109874	-2.6086	0.00909129	0.172722	TRAJ3
ENSG00000279570	14.4266	-0.286785	0.109015	-2.63069	0.00852123	0.167572
ENSG00000162944	52.2205	-0.28718	0.0715599	-4.01314	5.99173e-05	0.0163475	RFTN2
ENSG00000251215	17.4764	-0.288637	0.117494	-2.45661	0.0140256	0.199149	GOLGA5P1
ENSG00000228775	26.539	-0.288844	0.11058	-2.61208	0.00899925	0.171609	WEE2-AS1
ENSG00000143450	12.9733	-0.289889	0.109016	-2.65914	0.00783404	0.161701	OAZ3
ENSG00000232545	32.6584	-0.290141	0.0838137	-3.46174	0.000536694	0.0504231
ENSG00000175544	31.5068	-0.291174	0.103006	-2.82676	0.0047021	0.132428	CABP4
ENSG00000180189	13.0339	-0.29119	0.108363	-2.68718	0.00720582	0.156275	HMGB1P14
ENSG00000263307	12.8593	-0.291562	0.112299	-2.5963	0.00942346	0.174685
ENSG00000232186	29.8353	-0.293353	0.0724494	-4.04908	5.14201e-05	0.0157427
ENSG00000213073	96.1817	-0.293928	0.0799589	-3.67598	0.000236934	0.0323642
ENSG00000259118	19.1776	-0.294018	0.109094	-2.69509	0.00703687	0.155595
ENSG00000273319	25.05	-0.2951	0.113173	-2.60751	0.00912036	0.172722
ENSG00000170919	986.748	-0.295389	0.078504	-3.76273	0.000168069	0.025896	TPT1-AS1
ENSG00000231466	28.2513	-0.295617	0.0875149	-3.3779	0.000730405	0.0584401
ENSG00000249931	44.1038	-0.297269	0.0995826	-2.98515	0.00283435	0.10746	GOLGA8K
ENSG00000170486	187.626	-0.299754	0.120792	-2.48158	0.0130801	0.194933	KRT72
ENSG00000130649	13.4342	-0.303501	0.116603	-2.60286	0.00924493	0.174224	CYP2E1
ENSG00000233469	15.3377	-0.304584	0.100225	-3.03899	0.00237371	0.0982504	ST6GALNAC4P1
ENSG00000225568	10.2327	-0.305009	0.120062	-2.54042	0.011072	0.184628
ENSG00000244693	67.4759	-0.305943	0.0907495	-3.37129	0.000748162	0.0584401	CTAGE8
ENSG00000228634	10.8998	-0.30763	0.114983	-2.67543	0.00746324	0.159222
ENSG00000229853	9.54385	-0.309101	0.123039	-2.51222	0.0119974	0.190504
ENSG00000273691	23.0313	-0.309186	0.121202	-2.55099	0.0107417	0.18249
ENSG00000237200	10.3359	-0.312836	0.126923	-2.46477	0.01371	0.196763	ZBTB40-IT1
ENSG00000197580	58.3812	-0.313496	0.0792582	-3.95537	7.64164e-05	0.0183973	BCO2
ENSG00000285672	11.7307	-0.316749	0.117076	-2.7055	0.00682026	0.15527
ENSG00000261460	10.1585	-0.316798	0.124155	-2.55163	0.0107221	0.18249
ENSG00000233411	29.6871	-0.318261	0.107968	-2.94774	0.00320106	0.11354
ENSG00000255670	13.8978	-0.319825	0.109543	-2.91963	0.00350443	0.117082
ENSG00000206077	41.4338	-0.320541	0.130629	-2.45383	0.0141343	0.19958	ZDHHC11B
ENSG00000255198	56.3524	-0.32159	0.0667734	-4.81615	1.46356e-06	0.00362727	SNHG9
ENSG00000114656	17.6521	-0.322889	0.118862	-2.7165	0.00659762	0.153838	KIAA1257
ENSG00000109686	11.4291	-0.323859	0.125599	-2.57851	0.00992287	0.177248	SH3D19
ENSG00000229056	59.8857	-0.324326	0.098677	-3.28675	0.00101351	0.0687124	HECW2-AS1
ENSG00000104611	42.0826	-0.324973	0.112019	-2.90106	0.00371905	0.121392	SH2D4A
ENSG00000255040	12.4721	-0.326293	0.126715	-2.57501	0.0100236	0.178424	MORF4L1P3
ENSG00000170485	54.7472	-0.326307	0.10792	-3.0236	0.00249784	0.100789	NPAS2
ENSG00000220305	11.9312	-0.327087	0.120919	-2.70502	0.00683012	0.155311	HNRNPH1P1
ENSG00000211798	16.2311	-0.327376	0.116731	-2.80454	0.00503883	0.137673	TRAV18
ENSG00000279456	34.1339	-0.328784	0.120868	-2.7202	0.00652433	0.153429
ENSG00000206140	54.3312	-0.32927	0.107985	-3.0492	0.0022945	0.097497	TMEM191C
ENSG00000252391	9.03526	-0.332478	0.134632	-2.46954	0.0135286	0.196247	RNU6-638P
ENSG00000204248	48.9891	-0.335255	0.0919356	-3.64662	0.000265707	0.0350515	COL11A2
ENSG00000257246	9.13729	-0.335967	0.131236	-2.56001	0.0104668	0.180961	PHBP19
ENSG00000135919	190.096	-0.336342	0.1003	-3.35337	0.000798329	0.0598294	SERPINE2
ENSG00000281021	13.819	-0.336509	0.108797	-3.093	0.00198141	0.0919591
ENSG00000279841	23.6408	-0.336949	0.10501	-3.20871	0.0013333	0.0787709
ENSG00000229990	7.32322	-0.337819	0.130199	-2.59464	0.00946891	0.174685
ENSG00000233974	30.5717	-0.33812	0.120045	-2.8166	0.00485344	0.135414
ENSG00000115687	3595.23	-0.34063	0.0782372	-4.35382	1.33788e-05	0.00727069	PASK
ENSG00000104267	357.548	-0.342683	0.135945	-2.52074	0.0117107	0.188586	CA2
ENSG00000212124	10.3695	-0.343078	0.116146	-2.95386	0.00313823	0.112976	TAS2R19
ENSG00000260447	20.8779	-0.343805	0.122582	-2.8047	0.00503636	0.137673
ENSG00000244218	8.53437	-0.344014	0.133814	-2.57084	0.0101452	0.179024	RN7SL81P
ENSG00000078795	19.4139	-0.344464	0.108315	-3.18019	0.00147179	0.0830214	PKD2L2
ENSG00000010379	8.36522	-0.345123	0.136651	-2.52557	0.0115509	0.188215	SLC6A13
ENSG00000278881	9.93888	-0.351886	0.134065	-2.62474	0.00867157	0.16822
ENSG00000278743	15.7793	-0.352048	0.123046	-2.8611	0.00422176	0.127248
ENSG00000285651	12.9688	-0.353025	0.135219	-2.61077	0.00903394	0.17193
ENSG00000278963	10.5516	-0.354275	0.12358	-2.86676	0.00414699	0.126904
ENSG00000113140	135.696	-0.354747	0.143681	-2.46899	0.0135493	0.196247	SPARC
ENSG00000285627	11.2833	-0.356638	0.122977	-2.90003	0.00373126	0.121392
ENSG00000205584	14.6168	-0.356828	0.11318	-3.15274	0.00161744	0.0865332
ENSG00000280295	26.1525	-0.357095	0.0928804	-3.84467	0.000120713	0.0209454
ENSG00000208028	16.1131	-0.357684	0.112489	-3.17971	0.00147421	0.0830214	MIR616
ENSG00000227394	10.1359	-0.359104	0.126865	-2.8306	0.00464608	0.132409
ENSG00000275532	15.9061	-0.361933	0.119881	-3.01909	0.00253534	0.101519
ENSG00000124194	9.35411	-0.362253	0.141663	-2.55715	0.0105535	0.181159	GDAP1L1
ENSG00000151376	44.6987	-0.364257	0.127537	-2.8561	0.00428885	0.127954	ME3
ENSG00000213240	17.9383	-0.365789	0.102931	-3.55373	0.000379815	0.041029
ENSG00000278607	9.92075	-0.366947	0.139045	-2.63905	0.00831383	0.165669
ENSG00000235481	8.40826	-0.367379	0.138174	-2.65882	0.00784156	0.161701	UBE2R2-AS1
ENSG00000110237	25.7687	-0.36954	0.134941	-2.73852	0.0061717	0.148956	ARHGEF17
ENSG00000251791	9.06892	-0.369923	0.128198	-2.88556	0.00390718	0.123974	SCARNA6
ENSG00000138722	20.8067	-0.37007	0.127788	-2.89596	0.00378002	0.122246	MMRN1
ENSG00000253333	19.396	-0.372249	0.128343	-2.90041	0.0037267	0.121392
ENSG00000272256	24.7452	-0.374498	0.13235	-2.82961	0.00466052	0.132428
ENSG00000267501	10.4199	-0.376216	0.130456	-2.88385	0.00392841	0.124443
ENSG00000160179	365.636	-0.376466	0.139118	-2.70609	0.006808	0.155174	ABCG1
ENSG00000206706	49.9421	-0.377939	0.125963	-3.00038	0.00269639	0.104584
ENSG00000243708	24.8989	-0.378416	0.135817	-2.78622	0.00533272	0.140312	PLA2G4B
ENSG00000280355	34.3995	-0.380182	0.0835497	-4.55037	5.35513e-06	0.00556242
ENSG00000251497	11.1774	-0.385432	0.119526	-3.22469	0.00126111	0.0766214	PITPNM2-AS1
ENSG00000279069	9.5865	-0.387046	0.140723	-2.7504	0.00595218	0.146223
ENSG00000285696	8.5686	-0.387319	0.156934	-2.46804	0.0135856	0.196247
ENSG00000173261	8.47565	-0.387417	0.143631	-2.69732	0.00699008	0.155466	PLAC8L1
ENSG00000206927	42.5594	-0.391843	0.125388	-3.12504	0.00177779	0.0903132
ENSG00000255141	11.8756	-0.394859	0.127504	-3.09683	0.001956	0.0918603	HNRNPA1P76
ENSG00000267938	8.98336	-0.395009	0.150294	-2.62824	0.00858268	0.167982	EIF1P6
ENSG00000283361	13.8703	-0.396091	0.157338	-2.51746	0.0118206	0.18921	CFAP97D2
ENSG00000123201	9.77062	-0.402871	0.146945	-2.74164	0.00611329	0.147917	GUCY1B2
ENSG00000257366	9.42095	-0.404898	0.158322	-2.55743	0.0105448	0.181159
ENSG00000235677	15.9569	-0.406417	0.131191	-3.0979	0.00194895	0.0918603	NPM1P26
ENSG00000145335	45.7311	-0.415275	0.121251	-3.42493	0.00061496	0.0533519	SNCA
ENSG00000272168	114.213	-0.416506	0.0926263	-4.49663	6.9039e-06	0.00597685	CASC15
ENSG00000251450	8.8009	-0.419106	0.156613	-2.67605	0.00744945	0.159222	RASGRF2-AS1
ENSG00000232682	15.8719	-0.420729	0.142778	-2.94674	0.00321144	0.113699
ENSG00000116329	10.6045	-0.422961	0.154043	-2.74573	0.0060376	0.147138	OPRD1
ENSG00000271428	10.6802	-0.423288	0.120469	-3.51367	0.000441957	0.0455192
ENSG00000228939	9.36731	-0.424997	0.152404	-2.78862	0.00529332	0.140312	AKT3-IT1
ENSG00000217929	11.2228	-0.427396	0.171991	-2.48499	0.0129554	0.194809	CICP18
ENSG00000257563	9.11889	-0.428015	0.161543	-2.64954	0.00806012	0.163585
ENSG00000262319	345.578	-0.42981	0.148638	-2.89165	0.0038323	0.122608
ENSG00000275910	15.2324	-0.429897	0.119153	-3.60795	0.000308629	0.0369205
ENSG00000215030	977.487	-0.429982	0.151863	-2.83138	0.00463478	0.132409	RPL13P12
ENSG00000258354	10.2655	-0.43178	0.155608	-2.77479	0.00552368	0.141659
ENSG00000159208	18.051	-0.437513	0.173442	-2.52254	0.0116512	0.188249	CIART
ENSG00000258086	14.6277	-0.438038	0.129229	-3.38962	0.000699888	0.0578534
ENSG00000263393	7.97142	-0.439913	0.161798	-2.71891	0.00654972	0.153464
ENSG00000180481	16.8777	-0.440887	0.136578	-3.22809	0.0012462	0.076203	GLIPR1L2
ENSG00000161911	24.8128	-0.441898	0.170588	-2.59044	0.00958536	0.175411	TREML1
ENSG00000268758	139.734	-0.442707	0.141924	-3.11933	0.00181261	0.0905915	ADGRE4P
ENSG00000204420	16.9266	-0.444668	0.143865	-3.09086	0.00199579	0.0919591	MPIG6B
ENSG00000274602	1303.21	-0.448076	0.144663	-3.09738	0.00195241	0.0918603	PI4KAP1
ENSG00000260300	10.1505	-0.473169	0.13332	-3.54913	0.000386512	0.0413568
ENSG00000235820	7.73511	-0.474	0.161245	-2.93963	0.00328605	0.115071
ENSG00000259062	8.13856	-0.474791	0.169472	-2.80158	0.00508525	0.138085	ACTN1-AS1
ENSG00000127362	8.71497	-0.476774	0.152539	-3.1256	0.00177443	0.0903132	TAS2R3
ENSG00000278635	17.9075	-0.495165	0.156282	-3.16841	0.00153274	0.0847554
ENSG00000278616	27.8588	-0.505557	0.111597	-4.53021	5.89245e-06	0.00567443	BEND3P3
ENSG00000174945	140.732	-0.521319	0.175134	-2.97668	0.00291385	0.108559	AMZ1
ENSG00000225643	10.5536	-0.522104	0.144434	-3.61484	0.000300537	0.0368684
ENSG00000268081	10.7649	-0.544771	0.180031	-3.02598	0.00247827	0.100487
ENSG00000229311	8.63076	-0.545738	0.207485	-2.63026	0.00853199	0.167572
ENSG00000244671	7.63036	-0.548285	0.163273	-3.35808	0.000784851	0.0598294	RN7SL280P
ENSG00000210049	28.7606	-0.556653	0.2037	-2.73271	0.00628159	0.150502	MT-TF
ENSG00000218426	123.699	-0.558225	0.153274	-3.64202	0.000270509	0.0354204
ENSG00000233818	7.80563	-0.560847	0.21422	-2.61809	0.00884235	0.169625
ENSG00000249601	8.61663	-0.57867	0.188241	-3.07408	0.0021115	0.0948463	LINC01187
ENSG00000173809	49.5861	-0.585012	0.225253	-2.59713	0.00940065	0.174685	TDRD12
ENSG00000232827	7.78779	-0.591374	0.213304	-2.77245	0.00556362	0.141888	LINC01189
ENSG00000226816	42.4531	-0.624902	0.168973	-3.69825	0.000217095	0.030373
ENSG00000256673	54.1615	-0.626018	0.180526	-3.46775	0.000524832	0.0495503
ENSG00000243824	14.4445	-0.633002	0.195068	-3.24504	0.00117436	0.0733233	RPL12P6
ENSG00000236700	67.626	-0.650179	0.246781	-2.63464	0.00842255	0.166225	LINC01010
ENSG00000175445	1853.56	-0.664099	0.247136	-2.68718	0.00720572	0.156275	LPL
ENSG00000225774	13.5596	-0.668866	0.184402	-3.62721	0.000286497	0.036065	SIRPAP1
ENSG00000115457	45.5702	-0.672265	0.272876	-2.46363	0.0137539	0.196952	IGFBP2
ENSG00000258602	20.466	-0.714	0.257759	-2.77003	0.00560508	0.142044	LINC01629
ENSG00000230267	9.27904	-0.727857	0.243439	-2.98989	0.00279079	0.106648	HERC2P4
ENSG00000234648	70.7953	-0.731381	0.279151	-2.62002	0.00879253	0.169313
ENSG00000164266	148.183	-0.756437	0.225575	-3.35337	0.000798347	0.0598294	SPINK1
ENSG00000124785	11.5914	-0.760141	0.253421	-2.99952	0.00270405	0.104584	NRN1
ENSG00000270990	8.59904	-0.951958	0.203925	-4.66818	3.03883e-06	0.00531019
ENSG00000162723	9.6077	-0.979179	0.324488	-3.01761	0.00254777	0.101805	SLAMF9
ENSG00000267320	15.2973	-1.13306	0.454685	-2.49197	0.0127038	0.193489
ENSG00000261812	7.2145	-1.38364	0.519745	-2.66216	0.00776409	0.160958	TUBB8P7
ENSG00000238825	7.68949	-1.50785	0.462166	-3.26258	0.00110404	0.0714707	RNU1-13P
ENSG00000278596	7.97437	-1.56553	0.435359	-3.59595	0.000323207	0.0377271	MIR6077
ENSG00000272824	43.4183	-1.8748	0.419254	-4.47175	7.75812e-06	0.00597685
ENSG00000207340	16.9491	-1.97284	0.453616	-4.34914	1.3667e-05	0.00727069	RNVU1-1
ENSG00000252135	13.4252	-2.44121	0.483148	-5.05272	4.35564e-07	0.00279632	RNVU1-2

## Sheet: Supplementary Table 8B
Supplementary table 8B: Differentially expressed genes between M.tb-infected vs M.tb-uninfected infants among CMV-infected infants
ensembl	baseMean	log2FoldChange	lfcSE	stat	pvalue	padj	hgnc_symbol
ENSG00000088827	807.664	1.44396	0.421063	3.42932	0.0006051	0.0156645	SIGLEC1
ENSG00000049247	13.0164	1.41029	0.582813	2.41981	0.0155288	0.0991499	UTS2
ENSG00000251039	16.1357	1.40733	0.348222	4.04148	5.31157e-05	0.00424028	IGKV2D-40
ENSG00000204001	29.2318	1.31873	0.477089	2.76412	0.00570759	0.0563291	LCN8
ENSG00000239975	18.1657	1.28277	0.45254	2.83461	0.00458822	0.0489881	IGKV1D-33
ENSG00000112139	235.323	1.26076	0.462713	2.72472	0.0064357	0.0607464	MDGA1
ENSG00000253755	63.1023	1.21981	0.306407	3.98101	6.86228e-05	0.00478622	IGHGP
ENSG00000161133	35.3765	1.20904	0.402059	3.00711	0.00263743	0.0365822	USP41
ENSG00000251546	55.0204	1.1892	0.430613	2.76165	0.00575103	0.0565767	IGKV1D-39
ENSG00000223648	54.1391	1.17862	0.243066	4.84899	1.24093e-06	0.000585655	IGHV3-64
ENSG00000165949	293.464	1.17794	0.312178	3.7733	0.000161101	0.00739458	IFI27
ENSG00000115155	79.9456	1.17414	0.319142	3.67907	0.00023409	0.00908999	OTOF
ENSG00000108700	270.487	1.17361	0.366581	3.2015	0.00136712	0.0254689	CCL8
ENSG00000185745	1143.95	1.16937	0.271662	4.30451	1.67355e-05	0.00226495	IFIT1
ENSG00000172551	18.8468	1.16625	0.542846	2.14839	0.0316827	0.150452	MUCL1
ENSG00000181374	79.5431	1.16107	0.332215	3.49492	0.000474201	0.0136805	CCL13
ENSG00000106565	558.256	1.1246	0.332824	3.37897	0.000727578	0.0172575	TMEM176B
ENSG00000102794	208.17	1.10355	0.36467	3.02617	0.00247676	0.0352297	ACOD1
ENSG00000128383	244.134	1.10276	0.395121	2.79095	0.00525538	0.0536205	APOBEC3A
ENSG00000237510	32.4612	1.10251	0.232789	4.7361	2.1787e-06	0.000835441	GPAT2P1
ENSG00000124875	176.166	1.09605	0.283825	3.8617	0.000112601	0.00613175	CXCL6
ENSG00000259479	74.0991	1.07146	0.199227	5.37809	7.52814e-08	0.000107459	SORD2P
ENSG00000178965	11.7238	1.06671	0.235634	4.527	5.98273e-06	0.00123728	ERICH3
ENSG00000168062	35.5726	1.06425	0.288342	3.69092	0.000223444	0.00887943	BATF2
ENSG00000149131	74.2124	1.03689	0.341891	3.0328	0.00242297	0.0347629	SERPING1
ENSG00000253239	13.5127	1.01939	0.356666	2.8581	0.00426187	0.0469444	IGLVI-70
ENSG00000154319	92.036	1.0186	0.155068	6.56875	5.07394e-11	4.66955e-07	FAM167A
ENSG00000105419	25.2622	1.01135	0.390597	2.58924	0.00961889	0.0763785	MEIS3
ENSG00000172236	14.0242	1.00125	0.321164	3.11756	0.00182357	0.0297823	TPSAB1
ENSG00000154277	68.6155	0.996673	0.16276	6.12358	9.14943e-10	2.80674e-06	UCHL1
ENSG00000114248	9.09386	0.996499	0.354266	2.81285	0.00491038	0.0513044	LRRC31
ENSG00000225107	28.6811	0.980863	0.330103	2.97138	0.00296462	0.0388099
ENSG00000211654	25.3253	0.975725	0.315729	3.09039	0.00199896	0.0314282	IGLV5-37
ENSG00000106341	9.28551	0.968954	0.456004	2.12488	0.0335967	0.155684	PPP1R17
ENSG00000211892	190.625	0.96248	0.235873	4.0805	4.49391e-05	0.0040005	IGHG4
ENSG00000239571	116.31	0.943842	0.267191	3.53247	0.000411698	0.0125667	IGKV2D-30
ENSG00000205364	75.5795	0.936806	0.334102	2.80395	0.00504809	0.0521845	MT1M
ENSG00000236044	9.83305	0.932925	0.37691	2.47519	0.0133164	0.0912923	FABP5P2
ENSG00000186081	30.9654	0.93251	0.423261	2.20315	0.027584	0.138719	KRT5
ENSG00000157168	11.0655	0.932222	0.466542	1.99815	0.0457004	0.183765	NRG1
ENSG00000162849	49.3165	0.928055	0.136054	6.82121	9.02754e-12	1.66161e-07	KIF26B
ENSG00000258810	15.5003	0.924812	0.245154	3.77237	0.000161707	0.00740087
ENSG00000183117	12.1321	0.914002	0.425082	2.15018	0.0315411	0.150089	CSMD1
ENSG00000118523	75.8241	0.911382	0.288731	3.1565	0.00159673	0.0274411	CTGF
ENSG00000038945	189.056	0.904992	0.363062	2.49266	0.012679	0.0889025	MSR1
ENSG00000228549	17.4087	0.901683	0.392974	2.29451	0.0217613	0.120935
ENSG00000187510	22.7213	0.901119	0.208973	4.31213	1.61693e-05	0.0022646	PLEKHG7
ENSG00000168779	27.0253	0.900271	0.363721	2.47517	0.0133174	0.0912923	SHOX2
ENSG00000225523	19.4642	0.898589	0.359164	2.50189	0.0123533	0.0879779	IGKV6D-21
ENSG00000211658	65.2374	0.896012	0.293364	3.05426	0.00225613	0.0334407	IGLV3-27
ENSG00000188282	18.9131	0.894991	0.311399	2.8741	0.0040518	0.0457811	RUFY4
ENSG00000224607	25.1117	0.894351	0.283273	3.15721	0.00159288	0.0274119	IGKV1D-27
ENSG00000105492	14.7942	0.893264	0.210817	4.23715	2.26374e-05	0.0027056	SIGLEC6
ENSG00000119917	2072	0.891134	0.250363	3.55938	0.000371737	0.0118515	IFIT3
ENSG00000211891	10.5155	0.889399	0.3824	2.32583	0.0200274	0.115267	IGHE
ENSG00000184838	46.7224	0.884417	0.291062	3.03858	0.00237695	0.034466	PRR16
ENSG00000163421	25.7042	0.882548	0.250543	3.52255	0.000427421	0.0128338	PROK2
ENSG00000137198	30.7988	0.88051	0.23693	3.71634	0.000202133	0.0083606	GMPR
ENSG00000211652	62.9213	0.879991	0.216081	4.07251	4.65098e-05	0.00405715	IGLV7-43
ENSG00000275385	41.5463	0.876566	0.393061	2.2301	0.0257408	0.133011	CCL18
ENSG00000127951	591.351	0.871804	0.220899	3.94662	7.92608e-05	0.00510096	FGL2
ENSG00000241566	11.3328	0.866451	0.329161	2.6323	0.00848078	0.0712956	IGKV2D-24
ENSG00000117115	41.7026	0.864646	0.24919	3.46983	0.000520787	0.0143162	PADI2
ENSG00000100336	15.848	0.862842	0.301512	2.86171	0.00421357	0.0466686	APOL4
ENSG00000197646	67.287	0.86157	0.245058	3.51579	0.000438452	0.0130797	PDCD1LG2
ENSG00000104974	252.386	0.859248	0.275678	3.11685	0.00182793	0.029827	LILRA1
ENSG00000134321	2779.13	0.858685	0.255266	3.36389	0.000768524	0.0177977	RSAD2
ENSG00000229754	48.4246	0.854043	0.325971	2.62	0.00879308	0.0724789	CXCR2P1
ENSG00000196167	9.12069	0.848526	0.248748	3.41119	0.000646811	0.0162862	COLCA1
ENSG00000254415	208.315	0.844733	0.342549	2.46602	0.0136624	0.0924539	SIGLEC14
ENSG00000073737	78.8963	0.8426	0.299114	2.81698	0.00484768	0.0510157	DHRS9
ENSG00000140022	32.0791	0.841993	0.260071	3.23755	0.00120563	0.0236828	STON2
ENSG00000276775	112.158	0.835684	0.395938	2.11064	0.034803	0.158359	IGHV4-4
ENSG00000119922	1255.09	0.835674	0.209913	3.98104	6.86131e-05	0.00478622	IFIT2
ENSG00000133048	325.195	0.833094	0.312895	2.66254	0.00775544	0.0679099	CHI3L1
ENSG00000134901	24.0675	0.830306	0.154463	5.37545	7.63903e-08	0.000107459	KDELC1
ENSG00000101188	59.3396	0.828405	0.305077	2.7154	0.00661961	0.0615667	NTSR1
ENSG00000123610	1512.61	0.825734	0.307296	2.6871	0.00720761	0.0648828	TNFAIP6
ENSG00000163739	7956.32	0.813822	0.278134	2.92601	0.00343344	0.0419628	CXCL1
ENSG00000126709	1979.96	0.8132	0.206454	3.93889	8.18598e-05	0.00516393	IFI6
ENSG00000002933	228.996	0.81236	0.333625	2.43495	0.0148937	0.0971415	TMEM176A
ENSG00000198019	16.8919	0.811137	0.282124	2.87511	0.00403888	0.0456631	FCGR1B
ENSG00000211665	17.3481	0.810896	0.250198	3.24102	0.00119102	0.0234709	IGLV3-16
ENSG00000134028	978.371	0.799145	0.23524	3.39715	0.000680906	0.0166142	ADAMDEC1
ENSG00000170458	4308.01	0.798798	0.276806	2.88577	0.00390464	0.0448619	CD14
ENSG00000281162	19.1029	0.793541	0.295425	2.6861	0.00722919	0.0650027	LINC01127
ENSG00000240864	139.48	0.792935	0.214032	3.70474	0.000211607	0.00857892	IGKV1-16
ENSG00000211753	213.118	0.792767	0.270101	2.93507	0.00333472	0.0412769	TRBV28
ENSG00000230709	39.1916	0.79245	0.182882	4.33312	1.47008e-05	0.00214748
ENSG00000070915	16.6296	0.782151	0.222405	3.51679	0.000436801	0.0130578	SLC12A3
ENSG00000273972	9.41942	0.781112	0.267952	2.91512	0.00355555	0.0429222
ENSG00000211632	18.3891	0.781075	0.363693	2.14762	0.031744	0.150549	IGKV3D-11
ENSG00000225964	166.865	0.780563	0.196829	3.9657	7.31803e-05	0.00490057	NRIR
ENSG00000058866	17.3051	0.779296	0.153684	5.07078	3.96189e-07	0.000280471	DGKG
ENSG00000136848	13.9812	0.776389	0.258919	2.99857	0.00271247	0.0371049	DAB2IP
ENSG00000243264	51.933	0.775199	0.263176	2.94556	0.00322373	0.0406682	IGKV2D-29
ENSG00000071282	11.6401	0.77316	0.169387	4.56446	5.00784e-06	0.0012036	LMCD1
ENSG00000211896	5765.11	0.773074	0.248113	3.11582	0.00183436	0.0299055	IGHG1
ENSG00000163563	317.76	0.772327	0.280608	2.75233	0.0059172	0.0575321	MNDA
ENSG00000232216	69.2922	0.77139	0.238765	3.23075	0.00123466	0.0240223	IGHV3-43
ENSG00000176076	17.8958	0.765386	0.273683	2.79661	0.00516412	0.0528941	KCNE5
ENSG00000106066	34.0421	0.762841	0.303137	2.51649	0.0118531	0.0857242	CPVL
ENSG00000196209	94.4273	0.762324	0.344437	2.21325	0.0268805	0.136524	SIRPB2
ENSG00000144115	18.4571	0.757741	0.264382	2.86609	0.00415576	0.04633	THNSL2
ENSG00000211935	216.601	0.757709	0.28235	2.68358	0.00728385	0.0653027	IGHV1-3
ENSG00000218565	54.6512	0.757434	0.264682	2.86168	0.00421402	0.0466686
ENSG00000170956	32.8099	0.755784	0.312127	2.4214	0.015461	0.0988577	CEACAM3
ENSG00000102174	15.9933	0.753482	0.194709	3.86978	0.000108935	0.00600319	PHEX
ENSG00000228318	15.7377	0.753453	0.284939	2.64427	0.00818682	0.0698409
ENSG00000163121	35.316	0.750769	0.294937	2.54552	0.0109114	0.0818732	NEURL3
ENSG00000172594	218.912	0.750067	0.277051	2.70732	0.00678284	0.0626731	SMPDL3A
ENSG00000211685	53.056	0.7492	0.228451	3.27947	0.00104002	0.0213798	IGLC7
ENSG00000173918	325.082	0.748073	0.327947	2.28108	0.0225437	0.123457	C1QTNF1
ENSG00000111331	3914.66	0.744419	0.179525	4.1466	3.37453e-05	0.00348995	OAS3
ENSG00000108688	1290.75	0.744341	0.250393	2.97269	0.002952	0.0387549	CCL7
ENSG00000138821	2993	0.743686	0.218953	3.39655	0.000682406	0.0166142	SLC39A8
ENSG00000211673	430.779	0.742173	0.201413	3.68483	0.000228856	0.00896119	IGLV3-1
ENSG00000132669	858.864	0.740938	0.227742	3.25341	0.00114028	0.0228626	RIN2
ENSG00000132465	2295.62	0.740815	0.21243	3.48734	0.000487857	0.0138736	JCHAIN
ENSG00000211959	367.906	0.733923	0.224227	3.27313	0.00106365	0.0216806	IGHV4-39
ENSG00000187116	130.612	0.732026	0.276454	2.64791	0.00809912	0.0693683	LILRA5
ENSG00000123700	101.592	0.731989	0.228255	3.20688	0.00134181	0.0252788	KCNJ2
ENSG00000186407	3067.34	0.731566	0.28537	2.56358	0.01036	0.0794024	CD300E
ENSG00000211964	279.386	0.728865	0.247404	2.94606	0.00321855	0.0406608	IGHV3-48
ENSG00000049130	127.062	0.727281	0.212273	3.42617	0.000612166	0.015803	KITLG
ENSG00000163568	117.28	0.726397	0.157289	4.61822	3.8704e-06	0.00105474	AIM2
ENSG00000225886	40.2049	0.725529	0.188079	3.85758	0.000114516	0.00618119
ENSG00000187608	1301.05	0.725258	0.205889	3.52256	0.000427397	0.0128338	ISG15
ENSG00000237541	513.891	0.723627	0.250518	2.88852	0.00387057	0.0447514	HLA-DQA2
ENSG00000089127	1605.26	0.722477	0.156488	4.61682	3.89668e-06	0.00105474	OAS1
ENSG00000241351	512.036	0.720094	0.143373	5.02252	5.09985e-07	0.000347659	IGKV3-11
ENSG00000169116	27.6604	0.717944	0.177445	4.04602	5.20968e-05	0.0042242	PARM1
ENSG00000163666	10.4985	0.717692	0.281334	2.55103	0.0107404	0.0811195	HESX1
ENSG00000139567	37.4068	0.715663	0.283357	2.52565	0.0115483	0.0846007	ACVRL1
ENSG00000142089	829.524	0.710664	0.161132	4.41045	1.03154e-05	0.00174188	IFITM3
ENSG00000185339	25.6417	0.709584	0.311535	2.2777	0.0227445	0.123893	TCN2
ENSG00000127074	9.91862	0.708406	0.166567	4.25299	2.10939e-05	0.00257123	RGS13
ENSG00000205358	97.8421	0.706475	0.348352	2.02805	0.0425554	0.176882	MT1H
ENSG00000177294	22.732	0.699922	0.241445	2.89888	0.00374494	0.044139	FBXO39
ENSG00000222037	25.2115	0.699342	0.232051	3.01375	0.00258043	0.0360231	IGLC6
ENSG00000164124	28.5012	0.697289	0.30043	2.32097	0.0202884	0.116252	TMEM144
ENSG00000275410	48.1699	0.693409	0.152967	4.53306	5.8135e-06	0.00121697	HNF1B
ENSG00000163395	69.6033	0.6924	0.354534	1.95299	0.0508212	0.195489	IGFN1
ENSG00000261172	61.4664	0.692372	0.193527	3.57764	0.000346705	0.0114575
ENSG00000134326	1057.12	0.691845	0.211321	3.27391	0.0010607	0.0216685	CMPK2
ENSG00000215218	9.6489	0.690434	0.183799	3.75646	0.000172337	0.00764947	UBE2QL1
ENSG00000211972	36.82	0.689401	0.245413	2.80914	0.00496735	0.0516256	IGHV3-66
ENSG00000184979	487.532	0.688619	0.175525	3.92319	8.73857e-05	0.00517875	USP18
ENSG00000276758	37.2587	0.68748	0.320235	2.1468	0.0318093	0.150703
ENSG00000285972	10.2242	0.686638	0.241599	2.84205	0.00448239	0.0483321	CERNA2
ENSG00000179899	359.652	0.686448	0.314327	2.18387	0.028972	0.142704	PHC1P1
ENSG00000243238	213.026	0.686385	0.204393	3.35817	0.000784614	0.0180972	IGKV2-30
ENSG00000156234	159.735	0.682304	0.254422	2.68177	0.00732328	0.0655259	CXCL13
ENSG00000131042	2534.93	0.680672	0.251553	2.70588	0.0068124	0.0627572	LILRB2
ENSG00000185567	27.3876	0.680402	0.18777	3.6236	0.00029053	0.0103835	AHNAK2
ENSG00000171766	78.2849	0.678801	0.127811	5.31096	1.09049e-07	0.000118068	GATM
ENSG00000126262	126.717	0.678702	0.293812	2.30999	0.0208889	0.11852	FFAR2
ENSG00000136634	780.072	0.677577	0.265749	2.54968	0.0107821	0.0812175	IL10
ENSG00000165092	51.8074	0.676063	0.341511	1.97962	0.0477458	0.188495	ALDH1A1
ENSG00000278044	14.1615	0.675602	0.246379	2.74212	0.00610436	0.0585497
ENSG00000109265	61.9758	0.675173	0.241416	2.79672	0.00516238	0.0528941	KIAA1211
ENSG00000184785	13.7176	0.675107	0.214224	3.1514	0.0016249	0.0277439	SMIM10
ENSG00000171860	1068.32	0.671669	0.217666	3.08578	0.00203018	0.031601	C3AR1
ENSG00000227825	42.4982	0.671162	0.286338	2.34395	0.0190809	0.111706	SLC9A7P1
ENSG00000130529	36.8347	0.670865	0.225034	2.98118	0.00287143	0.0382151	TRPM4
ENSG00000237398	10.8998	0.668412	0.336493	1.98641	0.0469881	0.186652	HLA-DPA3
ENSG00000103647	52.2485	0.667518	0.209676	3.18357	0.00145471	0.0262293	CORO2B
ENSG00000173404	38.0493	0.664539	0.253035	2.62627	0.00863258	0.0717751	INSM1
ENSG00000166736	24.4265	0.662237	0.218618	3.0292	0.00245201	0.035013	HTR3A
ENSG00000169413	251.757	0.662079	0.189119	3.50085	0.000463777	0.0135496	RNASE6
ENSG00000165449	22.57	0.661805	0.221549	2.98717	0.00281577	0.0377198	SLC16A9
ENSG00000108691	11002.3	0.660974	0.2325	2.8429	0.00447047	0.0482318	CCL2
ENSG00000242534	214.069	0.659124	0.319339	2.06403	0.0390149	0.168649	IGKV2D-28
ENSG00000131203	1632.39	0.657638	0.257137	2.55754	0.0105414	0.0802423	IDO1
ENSG00000087245	23.623	0.656674	0.263213	2.49484	0.0126015	0.0885952	MMP2
ENSG00000154262	33.4477	0.655453	0.151841	4.31671	1.58372e-05	0.0022646	ABCA6
ENSG00000271605	273.254	0.655085	0.177028	3.70045	0.000215216	0.00866799	MILR1
ENSG00000236213	14.5966	0.654761	0.216717	3.02128	0.00251712	0.0355495
ENSG00000211669	94.6933	0.653436	0.326515	2.00124	0.0453663	0.183036	IGLV3-10
ENSG00000211679	1318.91	0.653133	0.158272	4.12665	3.68089e-05	0.0036635	IGLC3
ENSG00000198794	31.8502	0.652853	0.176151	3.70621	0.000210382	0.0085481	SCAMP5
ENSG00000019991	13.8831	0.650181	0.292159	2.22544	0.026052	0.134055	HGF
ENSG00000142549	55.5141	0.649154	0.28898	2.24636	0.0246808	0.129978	IGLON5
ENSG00000271133	12.4481	0.648793	0.224425	2.89092	0.00384122	0.0446348
ENSG00000248208	9.51472	0.648317	0.256026	2.53223	0.0113339	0.0835787	WDR45P1
ENSG00000121807	93.8045	0.648005	0.229568	2.82272	0.00476185	0.0503427	CCR2
ENSG00000152766	58.8309	0.647687	0.257816	2.5122	0.011998	0.086374	ANKRD22
ENSG00000250929	44.5285	0.647379	0.27421	2.36089	0.0182312	0.108788	LINC01181
ENSG00000231528	44.8492	0.647267	0.218491	2.96245	0.00305204	0.0394771	FAM225A
ENSG00000251301	107.192	0.645295	0.200814	3.2134	0.00131172	0.0248646	LINC02384
ENSG00000173578	57.3792	0.644588	0.280249	2.30005	0.0214452	0.119995	XCR1
ENSG00000004799	250.572	0.643958	0.2452	2.62626	0.00863297	0.0717751	PDK4
ENSG00000225698	27.2908	0.643091	0.239262	2.68781	0.00719233	0.0648675	IGHV3-72
ENSG00000225684	41.5642	0.639574	0.214421	2.98279	0.00285636	0.0381265	FAM225B
ENSG00000187037	20.471	0.638797	0.237407	2.69072	0.00712975	0.06455	GPR141
ENSG00000243290	135.862	0.633449	0.170385	3.71776	0.000200999	0.0083324	IGKV1-12
ENSG00000234965	18.8367	0.632456	0.192572	3.28425	0.00102255	0.0212428	SHISA8
ENSG00000186281	83.6884	0.631453	0.161709	3.90487	9.4276e-05	0.00545674	GPAT2
ENSG00000156113	9.77885	0.631409	0.234391	2.69382	0.00706378	0.0642371	KCNMA1
ENSG00000111012	322.21	0.629597	0.206008	3.05618	0.0022418	0.033384	CYP27B1
ENSG00000280079	16.8771	0.628164	0.202408	3.10346	0.00191274	0.0306928
ENSG00000130489	33.456	0.627482	0.206809	3.03411	0.00241245	0.0347445	SCO2
ENSG00000242048	420.976	0.626408	0.198864	3.14993	0.00163309	0.0277549
ENSG00000211668	270.125	0.625304	0.17498	3.57357	0.000352145	0.0115126	IGLV2-11
ENSG00000265531	10.1669	0.623366	0.320762	1.94339	0.0519691	0.197592	FCGR1CP
ENSG00000157601	3895.96	0.622418	0.176662	3.52322	0.000426343	0.0128338	MX1
ENSG00000211639	47.6014	0.621962	0.306102	2.03188	0.042166	0.175868	IGLV4-60
ENSG00000283972	13.1683	0.621448	0.250483	2.481	0.0131015	0.0906907
ENSG00000276600	509.98	0.618151	0.26568	2.32667	0.0199828	0.115047	RAB7B
ENSG00000162551	23.2891	0.616449	0.195852	3.14753	0.00164654	0.0278805	ALPL
ENSG00000205837	44.5369	0.610232	0.21555	2.83105	0.00463956	0.0493618	LINC00487
ENSG00000042980	1210.71	0.609737	0.116173	5.24853	1.5332e-07	0.000146495	ADAM28
ENSG00000278857	67.7236	0.609445	0.217359	2.80386	0.00504948	0.0521845	IGKV1D-12
ENSG00000173801	663.295	0.607628	0.133031	4.56755	4.93462e-06	0.0012036	JUP
ENSG00000254827	9.94815	0.607294	0.291103	2.08618	0.0369619	0.163657	SLC22A18AS
ENSG00000225492	121.337	0.60729	0.273846	2.21763	0.0265799	0.135596	GBP1P1
ENSG00000224373	589.99	0.606173	0.124015	4.88791	1.01912e-06	0.000521052	IGHV4-59
ENSG00000165685	46.72	0.604671	0.272879	2.2159	0.0266985	0.13605	TMEM52B
ENSG00000239998	350.303	0.60406	0.247028	2.44531	0.0144727	0.0956855	LILRA2
ENSG00000101916	456.946	0.602647	0.252339	2.38825	0.016929	0.104213	TLR8
ENSG00000285413	60.5499	0.602178	0.148049	4.06742	4.75375e-05	0.00408867
ENSG00000130702	177.973	0.601717	0.162443	3.70418	0.000212073	0.00857892	LAMA5
ENSG00000165304	34.2304	0.601409	0.190377	3.15905	0.00158285	0.0273816	MELK
ENSG00000270074	9.73061	0.59846	0.285051	2.09948	0.0357746	0.16068
ENSG00000124882	2904.78	0.597289	0.249078	2.398	0.0164847	0.10261	EREG
ENSG00000179750	38.2352	0.596639	0.218862	2.72609	0.00640893	0.0606805	APOBEC3B
ENSG00000225342	18.2392	0.596567	0.144748	4.12143	3.76533e-05	0.00366646
ENSG00000211637	147.77	0.595369	0.210069	2.83415	0.00459472	0.0490263	IGLV4-69
ENSG00000137801	18794	0.594337	0.282644	2.10278	0.0354854	0.159849	THBS1
ENSG00000272595	216.824	0.592095	0.197545	2.99726	0.00272419	0.0371143	OR10AH1P
ENSG00000253838	18.6424	0.591213	0.262593	2.25144	0.0243576	0.128824
ENSG00000100985	12236.7	0.590488	0.249314	2.36845	0.0178626	0.107269	MMP9
ENSG00000014257	30.7879	0.590115	0.199857	2.95269	0.00315017	0.0402014	ACPP
ENSG00000174600	417.946	0.590109	0.24815	2.37803	0.0174054	0.105835	CMKLR1
ENSG00000204179	17.7895	0.58908	0.271084	2.17305	0.0297763	0.144893	PTPN20
ENSG00000284882	17.3426	0.585413	0.144317	4.05643	4.98284e-05	0.00412709
ENSG00000172543	686.801	0.585245	0.18221	3.21193	0.00131845	0.0249665	CTSW
ENSG00000121594	319.563	0.584089	0.192848	3.02875	0.0024557	0.0350385	CD80
ENSG00000245812	20.7459	0.583376	0.166236	3.50931	0.000449267	0.0132732	LINC02202
ENSG00000111732	30.0799	0.582385	0.197665	2.94633	0.0032157	0.0406608	AICDA
ENSG00000135114	969.18	0.582061	0.169686	3.43022	0.000603091	0.0156645	OASL
ENSG00000211947	450.904	0.581721	0.163788	3.55167	0.000382796	0.0120235	IGHV3-21
ENSG00000250510	239.246	0.581698	0.205292	2.83352	0.00460387	0.0490521	GPR162
ENSG00000152315	41.1929	0.580051	0.236605	2.45156	0.0142238	0.0945822	KCNK13
ENSG00000239819	32.3373	0.577914	0.192263	3.00586	0.00264835	0.0366508	IGKV1D-8
ENSG00000180549	23.8324	0.577255	0.159737	3.61377	0.000301774	0.0104999	FUT7
ENSG00000189221	97.9538	0.574134	0.240905	2.38324	0.0171608	0.105027	MAOA
ENSG00000278196	75.5218	0.572809	0.214763	2.66716	0.00764942	0.0673622	IGLV2-8
ENSG00000138646	1151.21	0.572659	0.156886	3.65017	0.000262068	0.00971779	HERC5
ENSG00000211930	9.08974	0.572607	0.288825	1.98254	0.0474187	0.187575	IGHD3-3
ENSG00000158528	60.6535	0.572539	0.1271	4.50464	6.6486e-06	0.00134477	PPP1R9A
ENSG00000175857	472.668	0.572237	0.138925	4.11903	3.8047e-05	0.00366646	GAPT
ENSG00000231345	68.8316	0.571973	0.176817	3.23483	0.00121717	0.0238841	BEND3P1
ENSG00000048462	39.9728	0.571941	0.169624	3.37181	0.000746753	0.0175247	TNFRSF17
ENSG00000119865	14.9125	0.571089	0.185169	3.08414	0.0020414	0.0316545	CNRIP1
ENSG00000140287	33.1823	0.570731	0.226809	2.51635	0.0118578	0.0857248	HDC
ENSG00000280279	116.434	0.570698	0.180699	3.15828	0.00158701	0.0274119
ENSG00000184731	15.6558	0.569811	0.252092	2.26033	0.0238007	0.127052	FAM110C
ENSG00000185519	10.7394	0.567921	0.278851	2.03665	0.0416856	0.174879	FAM131C
ENSG00000279296	27.8453	0.567754	0.194349	2.92131	0.00348564	0.0424879	PRAL
ENSG00000104972	2308.65	0.567417	0.189279	2.99779	0.00271946	0.0371049	LILRB1
ENSG00000211651	383.038	0.565196	0.196765	2.87245	0.00407308	0.0459369	IGLV1-44
ENSG00000072694	387.695	0.564204	0.158999	3.54848	0.000387465	0.0121081	FCGR2B
ENSG00000121552	93.9077	0.564014	0.189367	2.97841	0.00289745	0.0383297	CSTA
ENSG00000255328	9.58952	0.562656	0.170395	3.30207	0.000959727	0.0202719
ENSG00000266786	23.7907	0.562331	0.285034	1.97285	0.0485121	0.1898	LGALS9DP
ENSG00000273824	35.8749	0.561927	0.186439	3.014	0.00257831	0.0360231
ENSG00000261616	11.7629	0.561758	0.245178	2.29123	0.0219504	0.121546
ENSG00000211638	75.7083	0.561748	0.238807	2.35231	0.0186571	0.110065	IGLV8-61
ENSG00000211895	5016.64	0.560695	0.225347	2.48813	0.0128415	0.0895309	IGHA1
ENSG00000214548	9.94833	0.56025	0.253035	2.21412	0.0268204	0.136484	MEG3
ENSG00000275832	24.2265	0.559431	0.157359	3.55511	0.000377814	0.0119224	ARHGAP23
ENSG00000171631	142.728	0.557849	0.231006	2.41486	0.0157411	0.100011	P2RY6
ENSG00000132530	3466.65	0.556421	0.154013	3.61282	0.000302882	0.0105186	XAF1
ENSG00000188011	36.3671	0.555744	0.228067	2.43675	0.0148197	0.0969035	RTP5
ENSG00000211593	44.3305	0.555083	0.114102	4.86479	1.14576e-06	0.000554971	IGKJ5
ENSG00000162711	429.258	0.553839	0.187216	2.95829	0.00309348	0.0397775	NLRP3
ENSG00000078018	11.5605	0.551771	0.1879	2.93651	0.00331929	0.041169	MAP2
ENSG00000163735	40401.6	0.551585	0.274186	2.01171	0.04425	0.180711	CXCL5
ENSG00000233381	11.5896	0.551109	0.272068	2.02563	0.0428027	0.177438	AK4P3
ENSG00000260101	80.578	0.55092	0.112838	4.8824	1.04805e-06	0.000521361
ENSG00000091129	124.899	0.550807	0.178133	3.09211	0.00198739	0.0313184	NRCAM
ENSG00000242076	316.362	0.549008	0.162394	3.38073	0.000722943	0.0172141	IGKV1-33
ENSG00000211937	206.447	0.54795	0.171519	3.19469	0.00139979	0.0258162	IGHV2-5
ENSG00000234338	66.3582	0.547594	0.176479	3.10288	0.00191646	0.0306928
ENSG00000135378	82.9052	0.547173	0.162493	3.36737	0.000758879	0.0176586	PRRG4
ENSG00000196664	244.575	0.544425	0.125363	4.34278	1.40692e-05	0.00210534	TLR7
ENSG00000267383	16.6393	0.544215	0.196767	2.76579	0.00567857	0.0560729
ENSG00000279400	29.2757	0.541992	0.221683	2.4449	0.0144893	0.0956908
ENSG00000228590	31.3162	0.541441	0.161139	3.36009	0.000779164	0.0180167
ENSG00000163554	10.8467	0.541196	0.202184	2.67674	0.00743419	0.0661546	SPTA1
ENSG00000240505	431.827	0.540712	0.0989678	5.46352	4.66787e-08	0.000107396	TNFRSF13B
ENSG00000157554	9.41108	0.54029	0.253327	2.13278	0.0329429	0.153965	ERG
ENSG00000058335	43.1813	0.539021	0.132788	4.05925	4.92314e-05	0.00412709	RASGRF1
ENSG00000166920	932.111	0.538119	0.183564	2.93151	0.00337322	0.0415023	C15orf48
ENSG00000125869	17.2696	0.537807	0.218943	2.45638	0.0140346	0.0938665	LAMP5
ENSG00000239855	37.1207	0.536163	0.2504	2.14122	0.0322559	0.152192	IGKV1-6
ENSG00000135363	215.209	0.536079	0.168045	3.19009	0.00142231	0.026015	LMO2
ENSG00000272821	106.322	0.535842	0.134986	3.96961	7.19916e-05	0.00490057
ENSG00000130396	472.919	0.533545	0.129103	4.1327	3.58532e-05	0.00362972	AFDN
ENSG00000184156	11.4716	0.531663	0.21514	2.47124	0.0134646	0.0918567	KCNQ3
ENSG00000100473	12.6828	0.531179	0.175003	3.03525	0.00240333	0.0346675	COCH
ENSG00000242580	9.96713	0.531013	0.272636	1.9477	0.0514514	0.19668	IGKV1D-43
ENSG00000166428	203.566	0.530213	0.133145	3.98221	6.82766e-05	0.00478622	PLD4
ENSG00000169224	10.9583	0.529858	0.24794	2.13704	0.0325947	0.152968	GCSAML
ENSG00000279415	19.166	0.529539	0.129769	4.08063	4.4913e-05	0.0040005
ENSG00000149418	372.706	0.528947	0.183717	2.87913	0.00398768	0.0453818	ST14
ENSG00000188157	1269.25	0.528359	0.119955	4.40465	1.05954e-05	0.00177291	AGRN
ENSG00000242371	625.213	0.527948	0.220029	2.39945	0.0164199	0.10231	IGKV1-39
ENSG00000211599	51.3946	0.526722	0.228286	2.30729	0.0210388	0.118931	IGKV5-2
ENSG00000183773	9.06285	0.525608	0.227436	2.31101	0.0208322	0.118308	AIFM3
ENSG00000197272	19.6408	0.524196	0.252917	2.0726	0.0382092	0.166812	IL27
ENSG00000111247	58.1884	0.523978	0.127073	4.12345	3.73243e-05	0.00366646	RAD51AP1
ENSG00000169715	197.245	0.523958	0.25698	2.0389	0.0414598	0.174455	MT1E
ENSG00000116990	50.433	0.523127	0.222431	2.35186	0.0186799	0.110131	MYCL
ENSG00000216863	10.7586	0.522422	0.14372	3.635	0.000277985	0.0100919	LY86-AS1
ENSG00000039600	11.1025	0.521913	0.180921	2.88476	0.00391716	0.0448937	SOX30
ENSG00000146072	151.155	0.521783	0.180678	2.88792	0.003878	0.0447514	TNFRSF21
ENSG00000187583	75.5252	0.521778	0.144459	3.61194	0.000303914	0.0105345	PLEKHN1
ENSG00000163734	7232.75	0.52049	0.224463	2.31882	0.0204048	0.116709	CXCL3
ENSG00000259004	11.8391	0.52021	0.186538	2.78876	0.00529107	0.0538648	LINC02285
ENSG00000039068	103.39	0.519833	0.209419	2.48227	0.0130549	0.0905041	CDH1
ENSG00000137959	4839.96	0.518764	0.21903	2.36846	0.0178621	0.107269	IFI44L
ENSG00000188906	600.725	0.518091	0.139689	3.70889	0.000208169	0.00849113	LRRK2
ENSG00000211660	319.03	0.516749	0.197995	2.60991	0.00905671	0.0736298	IGLV2-23
ENSG00000010704	64.2544	0.516735	0.125346	4.12247	3.74831e-05	0.00366646	HFE
ENSG00000188676	26.1872	0.51565	0.195936	2.63173	0.00849524	0.0713659	IDO2
ENSG00000116962	263.963	0.515427	0.241566	2.13369	0.032868	0.153741	NID1
ENSG00000134769	19.9627	0.515192	0.2381	2.16376	0.0304824	0.147052	DTNA
ENSG00000179348	86.3131	0.514932	0.23159	2.22347	0.0261844	0.134394	GATA2
ENSG00000163624	20.8706	0.514641	0.266312	1.93248	0.0533009	0.199971	CDS1
ENSG00000261218	22.1519	0.513872	0.16755	3.06698	0.00216236	0.0326247
ENSG00000265743	27.155	0.513501	0.251257	2.04372	0.0409808	0.173332
ENSG00000130202	584.158	0.513151	0.19279	2.6617	0.00777466	0.0679736	NECTIN2
ENSG00000112799	169.782	0.512771	0.132465	3.87098	0.000108397	0.00599145	LY86
ENSG00000130487	316.057	0.512679	0.144826	3.53996	0.000400192	0.0122806	KLHDC7B
ENSG00000164181	296.845	0.511254	0.240148	2.12892	0.0332613	0.154715	ELOVL7
ENSG00000163221	113.317	0.508141	0.221385	2.29528	0.0217172	0.120873	S100A12
ENSG00000160932	2948.11	0.506883	0.131652	3.85018	0.000118031	0.00627883	LY6E
ENSG00000152229	685.523	0.506376	0.164931	3.07024	0.0021389	0.0324556	PSTPIP2
ENSG00000104951	1191.36	0.506066	0.187104	2.70473	0.00683602	0.062805	IL4I1
ENSG00000136842	50.1921	0.505825	0.231967	2.18059	0.0292136	0.143503	TMOD1
ENSG00000054793	193.54	0.505326	0.232369	2.17467	0.0296549	0.144782	ATP9A
ENSG00000011590	73.3635	0.505148	0.132759	3.805	0.000141802	0.00690477	ZBTB32
ENSG00000198796	17.3116	0.504876	0.213219	2.36787	0.0178907	0.107367	ALPK2
ENSG00000198106	124.547	0.504669	0.140065	3.60311	0.000314435	0.0107613
ENSG00000025708	3603.98	0.504648	0.147624	3.41848	0.000629723	0.0160536	TYMP
ENSG00000132185	650.025	0.504022	0.136802	3.68432	0.000229312	0.00896119	FCRLA
ENSG00000189233	43.1949	0.503413	0.158656	3.17299	0.00150878	0.0267026	NUGGC
ENSG00000230943	27.6247	0.502594	0.204543	2.45715	0.0140043	0.0938343	LINC02541
ENSG00000013016	373.08	0.502363	0.115409	4.35289	1.34355e-05	0.00206078	EHD3
ENSG00000104361	60.0083	0.501359	0.229615	2.18347	0.029001	0.142763	NIPAL2
ENSG00000162738	54.7941	0.501104	0.124715	4.01798	5.86984e-05	0.00439689	VANGL2
ENSG00000235865	21.2541	0.500907	0.177782	2.81754	0.00483934	0.0509862	GSN-AS1
ENSG00000231389	4484.06	0.500636	0.107375	4.66249	3.12413e-06	0.000974624	HLA-DPA1
ENSG00000188313	2087.74	0.500403	0.133817	3.73946	0.000184416	0.00783591	PLSCR1
ENSG00000128438	624.967	0.50018	0.105347	4.74795	2.05492e-06	0.000808025	TBC1D27P
ENSG00000256590	42.0888	0.499662	0.143449	3.48321	0.000495434	0.0139806	TRDV3
ENSG00000240382	104.796	0.498971	0.215358	2.31694	0.0205072	0.117147	IGKV1-17
ENSG00000189057	841.602	0.498473	0.145618	3.42316	0.000618965	0.0159116	FAM111B
ENSG00000205927	101.052	0.498426	0.243587	2.04619	0.0407373	0.172767	OLIG2
ENSG00000100311	231.348	0.497235	0.184254	2.69864	0.00696243	0.0635982	PDGFB
ENSG00000196126	3217.4	0.497142	0.146533	3.39271	0.000692058	0.0167606	HLA-DRB1
ENSG00000134121	13.1185	0.496668	0.256493	1.93638	0.0528208	0.198981	CHL1
ENSG00000151773	32.4335	0.495473	0.163069	3.03843	0.00237813	0.034466	CCDC122
ENSG00000082397	2776.15	0.494318	0.200465	2.46585	0.0136687	0.0924608	EPB41L3
ENSG00000157227	11089.9	0.494234	0.248214	1.99116	0.0464635	0.18539	MMP14
ENSG00000237604	57.6216	0.494206	0.160511	3.07896	0.00207724	0.0319146
ENSG00000184293	202.29	0.492959	0.0775009	6.36069	2.00846e-10	1.23226e-06	CLECL1
ENSG00000183486	2958.9	0.492054	0.121742	4.04178	5.30462e-05	0.00424028	MX2
ENSG00000196141	527.707	0.492014	0.125391	3.92384	8.71477e-05	0.00517875	SPATS2L
ENSG00000211663	369.02	0.491917	0.206761	2.37916	0.0173524	0.105716	IGLV3-19
ENSG00000145416	670.008	0.49189	0.1315	3.74061	0.000183576	0.00782151	44256
ENSG00000245105	13.2294	0.491376	0.176365	2.78613	0.00533417	0.0540171	A2M-AS1
ENSG00000260528	244.852	0.490876	0.173451	2.83006	0.004654	0.0494601	FAM157C
ENSG00000162840	14.6361	0.490681	0.238581	2.05666	0.0397185	0.17041	MT2P1
ENSG00000163220	3313.34	0.490212	0.222421	2.20398	0.0275256	0.138542	S100A9
ENSG00000137965	2183.18	0.490177	0.179839	2.72563	0.0064178	0.0607332	IFI44
ENSG00000247498	10.389	0.49014	0.205391	2.38637	0.0170154	0.1045	GPRC5D-AS1
ENSG00000103528	76.4976	0.488055	0.136835	3.56674	0.000361452	0.0116309	SYT17
ENSG00000134571	83.2231	0.487432	0.154066	3.16378	0.00155735	0.0272736	MYBPC3
ENSG00000137936	244.48	0.486318	0.104986	4.63222	3.61771e-06	0.00105474	BCAR3
ENSG00000158104	61.681	0.485371	0.197321	2.45981	0.0139012	0.0933474	HPD
ENSG00000165029	3174.86	0.484281	0.201195	2.40703	0.0160829	0.101115	ABCA1
ENSG00000138642	1390.42	0.484093	0.130398	3.71242	0.000205283	0.00843402	HERC6
ENSG00000170837	28.6231	0.484088	0.204759	2.36418	0.0180701	0.108057	GPR27
ENSG00000150337	24.9488	0.483517	0.247237	1.95568	0.0505025	0.194752	FCGR1A
ENSG00000211592	8516.9	0.483441	0.148695	3.25123	0.00114906	0.0229887	IGKC
ENSG00000153132	9.26704	0.482114	0.237091	2.03345	0.0420068	0.175443	CLGN
ENSG00000181215	43.2384	0.482085	0.20913	2.30519	0.0211557	0.119263	C4orf50
ENSG00000211642	85.554	0.48193	0.247094	1.95039	0.0511296	0.196142	IGLV10-54
ENSG00000243753	304.119	0.481557	0.15061	3.19738	0.00138684	0.0257321	HLA-L
ENSG00000143603	21.7088	0.481127	0.235722	2.04108	0.0412428	0.173917	KCNN3
ENSG00000234036	20.8214	0.48097	0.178982	2.68726	0.00720416	0.0648828	TXNP6
ENSG00000232613	30.4527	0.480042	0.149896	3.20249	0.00136243	0.0254184	LINC02576
ENSG00000241506	109.926	0.479819	0.227065	2.11313	0.0345892	0.157821	PSMC1P1
ENSG00000114013	699.98	0.47947	0.155408	3.08523	0.00203395	0.031619	CD86
ENSG00000259354	111.001	0.478449	0.231871	2.06343	0.0390718	0.168718
ENSG00000168995	115.742	0.477906	0.201289	2.37423	0.0175858	0.106296	SIGLEC7
ENSG00000110436	77.4966	0.477693	0.240091	1.98963	0.0466314	0.185859	SLC1A2
ENSG00000165801	549.601	0.476327	0.185209	2.57184	0.0101159	0.0785838	ARHGEF40
ENSG00000248472	10.6795	0.476248	0.22534	2.11346	0.0345612	0.157771	DDX11L9
ENSG00000177409	7503.64	0.47587	0.130403	3.64923	0.000263027	0.00971779	SAMD9L
ENSG00000128268	112.337	0.475211	0.118912	3.99633	6.43332e-05	0.00472379	MGAT3
ENSG00000150764	64.1581	0.473949	0.175533	2.70007	0.00693257	0.0633934	DIXDC1
ENSG00000136869	646.896	0.47319	0.217726	2.17332	0.029756	0.144893	TLR4
ENSG00000185215	3404.1	0.47302	0.173731	2.72271	0.00647484	0.0609286	TNFAIP2
ENSG00000211968	29.3301	0.472133	0.231508	2.03938	0.0414121	0.174382	IGHV1-58
ENSG00000204287	10692.5	0.471902	0.090185	5.2326	1.67141e-07	0.000146495	HLA-DRA
ENSG00000160791	2491.97	0.470374	0.165681	2.83902	0.00452517	0.0485657	CCR5
ENSG00000065328	19.4477	0.467194	0.168235	2.77703	0.00548578	0.0549674	MCM10
ENSG00000203747	2283.05	0.466968	0.202599	2.30489	0.0211727	0.119288	FCGR3A
ENSG00000155465	2199.03	0.466707	0.203977	2.28803	0.0221355	0.12224	SLC7A7
ENSG00000211949	850.56	0.466387	0.149466	3.12035	0.00180636	0.0296327	IGHV3-23
ENSG00000180447	14.7959	0.465426	0.211908	2.19636	0.0280662	0.140148	GAS1
ENSG00000277443	4328.83	0.46514	0.171076	2.71891	0.00654983	0.061134	MARCKS
ENSG00000101336	3347.24	0.464998	0.172204	2.70027	0.00692835	0.0633934	HCK
ENSG00000211962	206.776	0.464879	0.179111	2.59548	0.00944588	0.0754277	IGHV1-46
ENSG00000244682	342.912	0.464874	0.151514	3.06818	0.00215364	0.0325718	FCGR2C
ENSG00000211941	206.461	0.463498	0.167862	2.76118	0.00575924	0.0565767	IGHV3-11
ENSG00000184060	490.419	0.461575	0.189197	2.43966	0.0147013	0.0965442	ADAP2
ENSG00000258623	9.22811	0.460777	0.18084	2.54799	0.0108347	0.0814969
ENSG00000111335	6038.33	0.459104	0.110609	4.15068	3.31494e-05	0.00348656	OAS2
ENSG00000197629	3757.01	0.458324	0.179524	2.553	0.0106801	0.0808961	MPEG1
ENSG00000239951	850.865	0.456649	0.167888	2.71996	0.00652898	0.061134	IGKV3-20
ENSG00000211966	443.433	0.456505	0.153101	2.98171	0.00286639	0.0381884	IGHV5-51
ENSG00000134061	730.154	0.456105	0.139019	3.28087	0.00103486	0.02133	CD180
ENSG00000240350	25.4507	0.45609	0.226651	2.0123	0.0441882	0.180579
ENSG00000198598	79.1459	0.455727	0.156917	2.90425	0.00368131	0.0438045	MMP17
ENSG00000166833	33.9949	0.455498	0.17473	2.60687	0.00913737	0.0740565	NAV2
ENSG00000080007	28.986	0.453546	0.173946	2.60739	0.0091235	0.0739919	DDX43
ENSG00000131401	959.176	0.452215	0.106194	4.25837	2.05926e-05	0.00252685	NAPSB
ENSG00000223972	17.8794	0.452187	0.226971	1.99226	0.0463422	0.185027	DDX11L1
ENSG00000240671	71.978	0.452135	0.15664	2.88646	0.00389596	0.0448455	IGKV1-8
ENSG00000260828	29.705	0.451596	0.17036	2.65083	0.00802941	0.0691739	HMGB3P32
ENSG00000180316	57.8651	0.450681	0.219387	2.05427	0.0399496	0.170923	PNPLA1
ENSG00000128602	15.9508	0.45029	0.181975	2.47447	0.0133435	0.091437	SMO
ENSG00000242265	229.057	0.449047	0.179298	2.50447	0.0122635	0.087591	PEG10
ENSG00000089692	461.568	0.448157	0.202739	2.21051	0.0270696	0.137144	LAG3
ENSG00000110057	1053.63	0.447023	0.118411	3.77517	0.000159896	0.00738459	UNC93B1
ENSG00000143344	1955.83	0.446555	0.213067	2.09585	0.0360959	0.161398	RGL1
ENSG00000249741	19.7387	0.44562	0.185769	2.39878	0.0164498	0.102462
ENSG00000256356	12.2055	0.445158	0.184968	2.40667	0.0160987	0.101115	HSPA8P5
ENSG00000125148	2043.74	0.444179	0.215338	2.06271	0.0391407	0.168821	MT2A
ENSG00000137393	1290.23	0.444139	0.177457	2.5028	0.0123215	0.087916	RNF144B
ENSG00000254682	85.0567	0.444084	0.211287	2.10181	0.0355703	0.159997
ENSG00000145685	3632.97	0.443964	0.1711	2.59477	0.00946547	0.0755513	LHFPL2
ENSG00000263961	32.5082	0.443656	0.118465	3.74505	0.000180358	0.00775623	RHEX
ENSG00000168994	159.013	0.443556	0.154493	2.87104	0.00409124	0.0459446	PXDC1
ENSG00000182379	61.1421	0.442952	0.182662	2.42498	0.0153091	0.0983951	NXPH4
ENSG00000158481	84.8013	0.442651	0.15206	2.91104	0.0036023	0.0433359	CD1C
ENSG00000197465	21.9535	0.442088	0.165771	2.66686	0.00765639	0.0673631	GYPE
ENSG00000211648	335.142	0.441811	0.196047	2.2536	0.0242212	0.128403	IGLV1-47
ENSG00000138180	37.3407	0.441672	0.225387	1.95962	0.0500407	0.193579	CEP55
ENSG00000270325	9.50408	0.441156	0.221122	1.99508	0.0460346	0.184184	BNIP3P9
ENSG00000179630	1130.46	0.440484	0.181915	2.42137	0.0154621	0.0988577	LACC1
ENSG00000170365	59.3759	0.440387	0.111837	3.93777	8.22414e-05	0.00516393	SMAD1
ENSG00000198795	47.7279	0.440323	0.175536	2.50845	0.0121261	0.087083	ZNF521
ENSG00000108239	308.091	0.439643	0.170522	2.57822	0.00993096	0.0776835	TBC1D12
ENSG00000187997	11.3346	0.439166	0.189155	2.32172	0.0202479	0.116173	C17orf99
ENSG00000187642	16.6674	0.438605	0.178799	2.45306	0.0141645	0.0943581	PERM1
ENSG00000196189	1030.72	0.438226	0.152398	2.87554	0.00403337	0.045657	SEMA4A
ENSG00000143297	561.287	0.438106	0.127551	3.43475	0.000593107	0.0155459	FCRL5
ENSG00000137462	3356.65	0.435777	0.188119	2.31649	0.0205313	0.117191	TLR2
ENSG00000285417	123.162	0.435703	0.0981975	4.43701	9.12171e-06	0.00161437
ENSG00000154237	523.124	0.435691	0.0872591	4.99307	5.94277e-07	0.000377182	LRRK1
ENSG00000227508	11.8884	0.435521	0.198798	2.19078	0.028468	0.141556	LINC01624
ENSG00000116711	119.199	0.435284	0.199727	2.17939	0.0293026	0.14361	PLA2G4A
ENSG00000186818	1793.53	0.435173	0.205833	2.1142	0.0344984	0.157602	LILRB4
ENSG00000100368	2523.65	0.435164	0.130886	3.32476	0.00088495	0.0194141	CSF2RB
ENSG00000198947	593.435	0.434781	0.120174	3.61793	0.000296973	0.0104514	DMD
ENSG00000123342	3277.62	0.434704	0.204569	2.12497	0.0335889	0.155684	MMP19
ENSG00000253234	12.5517	0.434513	0.174815	2.48556	0.0129347	0.0899082	IGLV2-5
ENSG00000278727	18.5762	0.434233	0.219983	1.97394	0.048389	0.189707
ENSG00000234456	28.9081	0.433872	0.201637	2.15175	0.031417	0.149692	MAGI2-AS3
ENSG00000131724	1241.13	0.433589	0.148469	2.92039	0.00349592	0.0425796	IL13RA1
ENSG00000123096	34.998	0.433401	0.19584	2.21304	0.0268952	0.136561	SSPN
ENSG00000177494	151.34	0.432985	0.122889	3.52338	0.000426086	0.0128338	ZBED2
ENSG00000168916	274.948	0.432925	0.100434	4.31054	1.62858e-05	0.0022646	ZNF608
ENSG00000074964	594.898	0.432845	0.210654	2.05477	0.0399012	0.170846	ARHGEF10L
ENSG00000112874	64.9924	0.430871	0.118078	3.64904	0.000263224	0.00971779	NUDT12
ENSG00000105889	20.9831	0.430862	0.172401	2.49919	0.0124479	0.0881128	STEAP1B
ENSG00000073150	116.682	0.430796	0.196776	2.18928	0.0285768	0.141737	PANX2
ENSG00000189134	11.9565	0.430639	0.18541	2.32263	0.0201993	0.115966	NKAPL
ENSG00000183160	37.5847	0.430608	0.220638	1.95164	0.0509805	0.195755	TMEM119
ENSG00000189013	110.854	0.430603	0.19027	2.26311	0.0236288	0.126575	KIR2DL4
ENSG00000167748	25.2632	0.430428	0.176398	2.4401	0.0146833	0.096495	KLK1
ENSG00000162512	67.4998	0.430368	0.200276	2.14887	0.0316447	0.150349	SDC3
ENSG00000197705	335.668	0.429864	0.133227	3.22655	0.00125292	0.02426	KLHL14
ENSG00000215861	1578.79	0.429845	0.188897	2.27555	0.0228731	0.124175
ENSG00000111186	37.1962	0.429545	0.20615	2.08366	0.0371914	0.164304	WNT5B
ENSG00000237438	27.0209	0.429376	0.162656	2.63978	0.00829607	0.0704	CECR7
ENSG00000166689	195.142	0.428823	0.104365	4.10888	3.9758e-05	0.00375178	PLEKHA7
ENSG00000150938	1490.28	0.428626	0.13472	3.18161	0.00146456	0.0263401	CRIM1
ENSG00000232124	26.396	0.427542	0.19496	2.19298	0.0283088	0.140939
ENSG00000164308	5135.18	0.427063	0.165816	2.57552	0.010009	0.078155	ERAP2
ENSG00000137628	2598.61	0.427055	0.120046	3.55743	0.000374496	0.0118861	DDX60
ENSG00000253320	155.108	0.426651	0.169269	2.52056	0.0117169	0.085343	AZIN1-AS1
ENSG00000170476	471.488	0.426604	0.151685	2.81243	0.00491693	0.0513044	MZB1
ENSG00000068079	1069.39	0.425917	0.118665	3.58925	0.000331636	0.0111592	IFI35
ENSG00000273073	29.2557	0.425826	0.144933	2.93809	0.00330239	0.0411472
ENSG00000136205	3164.52	0.425722	0.17868	2.38259	0.0171913	0.105027	TNS3
ENSG00000152778	1058.38	0.425184	0.0956175	4.44671	8.71934e-06	0.00157341	IFIT5
ENSG00000109436	1642.53	0.424802	0.125571	3.38295	0.000717106	0.01711	TBC1D9
ENSG00000159618	418.328	0.424126	0.134027	3.16448	0.00155361	0.027234	ADGRG5
ENSG00000117009	585.294	0.424039	0.131248	3.23081	0.00123438	0.0240223	KMO
ENSG00000267053	24.8524	0.423677	0.206524	2.05147	0.0402212	0.171567
ENSG00000180881	13.7116	0.423409	0.179308	2.36135	0.0182084	0.108707	CAPS2
ENSG00000112096	21352.6	0.423362	0.212907	1.98848	0.046759	0.186006	SOD2
ENSG00000125355	70.9335	0.423347	0.168438	2.51337	0.0119583	0.0861804	TMEM255A
ENSG00000237082	9.17736	0.423095	0.173265	2.4419	0.0146102	0.0961785	COX5BP6
ENSG00000064787	25.9281	0.42308	0.21488	1.96891	0.0489631	0.190718	BCAS1
ENSG00000174123	605.511	0.422771	0.119193	3.54694	0.000389733	0.0121173	TLR10
ENSG00000225434	14.4513	0.421603	0.195415	2.15747	0.0309689	0.148287	LINC01504
ENSG00000135821	11623.3	0.420847	0.156937	2.68164	0.00732632	0.0655259	GLUL
ENSG00000167601	22.2345	0.420463	0.199236	2.11037	0.0348261	0.158359	AXL
ENSG00000189060	1029.04	0.420403	0.156381	2.68832	0.0071812	0.0648563	H1F0
ENSG00000205853	10.6056	0.420388	0.160504	2.61916	0.00881454	0.0724866	RFPL3S
ENSG00000142182	11.9882	0.419264	0.210778	1.98913	0.0466872	0.186001	DNMT3L
ENSG00000143162	3287.37	0.419096	0.169858	2.46733	0.0136124	0.0922157	CREG1
ENSG00000226212	12.3419	0.418847	0.200327	2.09081	0.0365448	0.162749	TRGV6
ENSG00000275491	20.1894	0.418517	0.215506	1.94202	0.0521343	0.197893	LINC01730
ENSG00000184524	11.4055	0.418087	0.149298	2.80035	0.00510472	0.0525822	CEND1
ENSG00000248632	33.0582	0.41793	0.12403	3.36959	0.000752801	0.0175794
ENSG00000128833	128.044	0.417784	0.155242	2.69118	0.00711997	0.0645492	MYO5C
ENSG00000241755	76.9778	0.417317	0.208401	2.00248	0.0452335	0.182701	IGKV1-9
ENSG00000106701	612.562	0.417068	0.151922	2.74529	0.00604583	0.0583549	FSD1L
ENSG00000175489	966.209	0.416868	0.214495	1.94349	0.0519572	0.197592	LRRC25
ENSG00000167600	200.783	0.416277	0.210812	1.97463	0.04831	0.189634	CYP2S1
ENSG00000187122	32.1319	0.415989	0.142584	2.9175	0.00352852	0.0428403	SLIT1
ENSG00000198223	1933.5	0.41567	0.165954	2.50473	0.0122545	0.0875717	CSF2RA
ENSG00000111817	1324.43	0.415594	0.182109	2.28212	0.0224826	0.123245	DSE
ENSG00000055332	3246.18	0.41541	0.0998306	4.16115	3.16654e-05	0.00338989	EIF2AK2
ENSG00000267293	10.7983	0.415337	0.207049	2.00599	0.0448577	0.182087
ENSG00000230266	25.3313	0.415312	0.181545	2.28766	0.0221575	0.122325	XXYLT1-AS2
ENSG00000255760	51.3597	0.414662	0.140078	2.96022	0.00307417	0.039624	LINC02422
ENSG00000136048	1231.89	0.414203	0.162458	2.5496	0.0107847	0.0812175	DRAM1
ENSG00000135540	29.3945	0.414157	0.180863	2.28989	0.0220277	0.121827	NHSL1
ENSG00000107731	15.5852	0.413869	0.196663	2.10446	0.0353382	0.159616	UNC5B
ENSG00000103485	33.3315	0.412843	0.107754	3.83134	0.000127449	0.00642206	QPRT
ENSG00000153162	113.45	0.412288	0.163707	2.51845	0.0117874	0.085585	BMP6
ENSG00000169026	179.184	0.41216	0.160135	2.57383	0.0100578	0.0783381	SLC49A3
ENSG00000088882	100.691	0.412058	0.120735	3.41292	0.000642697	0.0162493	CPXM1
ENSG00000169403	3570.22	0.412038	0.188792	2.1825	0.0290729	0.143065	PTAFR
ENSG00000231769	11.8227	0.411651	0.172077	2.39224	0.0167458	0.103396
ENSG00000106868	226.304	0.411559	0.125309	3.28435	0.00102217	0.0212428	SUSD1
ENSG00000064989	305.847	0.411445	0.162653	2.52959	0.0114196	0.0840756	CALCRL
ENSG00000144843	396.928	0.41142	0.111329	3.69552	0.000219435	0.00876131	ADPRH
ENSG00000248905	479.623	0.410885	0.178462	2.30236	0.0213147	0.119646	FMN1
ENSG00000254087	7863.82	0.408372	0.125547	3.25273	0.00114301	0.0228925	LYN
ENSG00000111321	407.387	0.407906	0.192765	2.11608	0.0343381	0.157299	LTBR
ENSG00000137124	123.385	0.407352	0.098604	4.1312	3.60882e-05	0.00362972	ALDH1B1
ENSG00000137842	243.934	0.407186	0.0884185	4.60521	4.12044e-06	0.00109914	TMEM62
ENSG00000085514	1658.93	0.407	0.186269	2.18501	0.0288879	0.142624	PILRA
ENSG00000256427	16.2269	0.406952	0.19302	2.10834	0.0350018	0.158695
ENSG00000130508	111.948	0.40671	0.199011	2.04365	0.0409878	0.173332	PXDN
ENSG00000135338	9.40746	0.406013	0.193427	2.09904	0.0358131	0.160735	LCA5
ENSG00000211594	30.9307	0.405922	0.108098	3.75512	0.000173255	0.00766571	IGKJ4
ENSG00000237669	11.1216	0.405831	0.203865	1.99068	0.0465157	0.185478
ENSG00000238025	16.6224	0.40521	0.204892	1.97768	0.0479652	0.188989	ZDHHC4P1
ENSG00000205763	49.3944	0.40467	0.156652	2.58324	0.0097878	0.076989	RP9P
ENSG00000079215	992.716	0.404329	0.19426	2.08138	0.0373995	0.164722	SLC1A3
ENSG00000279024	36.3463	0.404066	0.134037	3.01458	0.00257332	0.0360231
ENSG00000128815	3188.35	0.403709	0.0818188	4.93418	8.04891e-07	0.000462963	WDFY4
ENSG00000115267	2018.58	0.403626	0.106216	3.80004	0.000144675	0.00697591	IFIH1
ENSG00000161929	93.1839	0.403597	0.130752	3.08674	0.00202366	0.0315924	SCIMP
ENSG00000150760	72.3948	0.4033	0.161295	2.50039	0.0124058	0.0880413	DOCK1
ENSG00000012779	1511.63	0.402217	0.120409	3.34044	0.000836457	0.0187983	ALOX5
ENSG00000148773	363.899	0.401425	0.19617	2.04631	0.0407259	0.172759	MKI67
ENSG00000255189	16.3017	0.401357	0.176085	2.27934	0.022647	0.123659	GLYATL1P1
ENSG00000132563	11.1842	0.401039	0.178467	2.24713	0.0246319	0.12987	REEP2
ENSG00000160683	121.099	0.400662	0.105769	3.78809	0.000151808	0.00715376	CXCR5
ENSG00000086300	1124	0.400309	0.133267	3.00382	0.00266613	0.0367311	SNX10
ENSG00000166963	188.772	0.400093	0.137593	2.9078	0.00363975	0.0436154	MAP1A
ENSG00000151490	329.196	0.399556	0.0893584	4.47138	7.77157e-06	0.00149004	PTPRO
ENSG00000130303	2109.45	0.39863	0.0982746	4.05629	4.98586e-05	0.00412709	BST2
ENSG00000124570	578.822	0.398414	0.133347	2.98781	0.00280988	0.0377107	SERPINB6
ENSG00000109861	2382.38	0.396718	0.124222	3.19362	0.001405	0.0258862	CTSC
ENSG00000258539	10.772	0.396559	0.175821	2.25547	0.024104	0.128077
ENSG00000166825	8853.2	0.396222	0.184921	2.14265	0.032141	0.151884	ANPEP
ENSG00000108771	788.362	0.396066	0.113879	3.47795	0.000505262	0.0141335	DHX58
ENSG00000081189	1014.91	0.396031	0.0947476	4.17985	2.91699e-05	0.00319584	MEF2C
ENSG00000091106	457.816	0.395879	0.167985	2.35663	0.0184416	0.10946	NLRC4
ENSG00000253535	21.2268	0.395109	0.156829	2.51936	0.011757	0.0854506
ENSG00000269800	12.2719	0.394956	0.175634	2.24874	0.0245288	0.129437	PLEKHA3P1
ENSG00000237984	18.432	0.394418	0.190709	2.06817	0.0386242	0.16775	PTENP1
ENSG00000169896	1498.5	0.391784	0.164742	2.37816	0.0173993	0.105834	ITGAM
ENSG00000175899	130.051	0.391628	0.157107	2.49275	0.0126759	0.0889025	A2M
ENSG00000112796	80.6192	0.391612	0.177612	2.20487	0.027463	0.138408	ENPP5
ENSG00000123095	286.464	0.391263	0.170677	2.29242	0.0218812	0.121309	BHLHE41
ENSG00000229391	217.21	0.39099	0.185567	2.107	0.0351176	0.15901	HLA-DRB6
ENSG00000187621	148.755	0.390478	0.163775	2.38423	0.0171149	0.1049	TCL6
ENSG00000048052	642.449	0.390477	0.0786392	4.96543	6.85494e-07	0.000407007	HDAC9
ENSG00000259668	59.7747	0.39039	0.180297	2.16526	0.030368	0.146612
ENSG00000197128	246.771	0.39013	0.0856942	4.55258	5.29916e-06	0.00121434	ZNF772
ENSG00000133106	2996.35	0.389607	0.140099	2.78093	0.00542032	0.054547	EPSTI1
ENSG00000211956	517.909	0.389582	0.120506	3.23288	0.0012255	0.0239707	IGHV4-34
ENSG00000262454	12.3	0.389405	0.15547	2.50469	0.012256	0.0875717	MIR193BHG
ENSG00000211666	633.103	0.389296	0.166105	2.34367	0.0190949	0.111752	IGLV2-14
ENSG00000085741	10.9156	0.38879	0.184436	2.108	0.0350313	0.158736	WNT11
ENSG00000162545	28.2001	0.388324	0.145202	2.67437	0.00748688	0.0664754	CAMK2N1
ENSG00000178538	15.1649	0.38818	0.177066	2.19229	0.0283586	0.141149	CA8
ENSG00000177989	544.88	0.388086	0.15037	2.58087	0.00985516	0.0773535	ODF3B
ENSG00000147650	875.632	0.388009	0.153887	2.52139	0.0116894	0.0852106	LRP12
ENSG00000255151	66.3843	0.387862	0.18719	2.07202	0.0382637	0.166947	GLYATL1B
ENSG00000196550	48.6394	0.387739	0.157668	2.45921	0.0139244	0.0934692	FAM72A
ENSG00000256448	12.1109	0.387691	0.151688	2.55585	0.010593	0.0805013
ENSG00000152503	215.762	0.3875	0.190978	2.02903	0.0424551	0.176674	TRIM36
ENSG00000250312	232.586	0.387222	0.156879	2.46829	0.0135761	0.0921136	ZNF718
ENSG00000158517	1640.18	0.387061	0.117039	3.30712	0.000942601	0.0200805	NCF1
ENSG00000205755	247.124	0.387034	0.175769	2.20194	0.0276693	0.138996	CRLF2
ENSG00000232973	61.9953	0.386922	0.195504	1.9791	0.0478051	0.188618	CYP1B1-AS1
ENSG00000237638	13.1397	0.386445	0.17264	2.23845	0.0251917	0.131516	LINC02245
ENSG00000196975	790.691	0.385897	0.121317	3.18088	0.00146827	0.0263401	ANXA4
ENSG00000261786	11.0474	0.385751	0.199155	1.93694	0.0527531	0.198848
ENSG00000126231	23.1709	0.385609	0.195862	1.96878	0.0489786	0.190718	PROZ
ENSG00000188610	41.5401	0.385215	0.170747	2.25606	0.024067	0.127958	FAM72B
ENSG00000283196	76.6014	0.385164	0.146455	2.62991	0.00854082	0.0714556
ENSG00000074657	291.506	0.38505	0.0618929	6.22122	4.93306e-10	1.81596e-06	ZNF532
ENSG00000136514	355.865	0.384799	0.132694	2.89991	0.00373271	0.0440695	RTP4
ENSG00000124256	580.908	0.383491	0.149175	2.57074	0.010148	0.0785838	ZBP1
ENSG00000130589	3119.32	0.38338	0.119606	3.20536	0.00134893	0.0253609	HELZ2
ENSG00000244437	456.373	0.383273	0.162369	2.3605	0.0182501	0.108799	IGKV3-15
ENSG00000104093	3832.13	0.382731	0.180945	2.11518	0.034415	0.157465	DMXL2
ENSG00000211890	985.989	0.382405	0.194808	1.96299	0.0496476	0.1926	IGHA2
ENSG00000148180	4092.71	0.382152	0.182969	2.08862	0.0367419	0.163075	GSN
ENSG00000002587	266.078	0.381875	0.19041	2.00554	0.0449058	0.182087	HS3ST1
ENSG00000205559	31.3949	0.381689	0.104535	3.6513	0.000260918	0.00971779	CHKB-DT
ENSG00000279493	17.3722	0.381318	0.16335	2.33436	0.0195767	0.11372
ENSG00000014914	60.4732	0.380939	0.178316	2.13631	0.032654	0.153168	MTMR11
ENSG00000152689	531.543	0.380852	0.0889152	4.28332	1.84122e-05	0.00238904	RASGRP3
ENSG00000211595	30.0458	0.380841	0.129352	2.94423	0.0032376	0.0407044	IGKJ3
ENSG00000174130	540.284	0.380572	0.0970328	3.92209	8.77833e-05	0.00517875	TLR6
ENSG00000141469	86.8714	0.380434	0.119237	3.19058	0.00141987	0.0260041	SLC14A1
ENSG00000164330	626.838	0.380195	0.103176	3.68492	0.000228776	0.00896119	EBF1
ENSG00000225872	10.7109	0.379893	0.175863	2.16017	0.0307598	0.147785	LINC01529
ENSG00000108932	719.632	0.379892	0.175463	2.16508	0.0303817	0.146619	SLC16A6
ENSG00000170390	13.2627	0.379648	0.153116	2.47948	0.0131573	0.0908473	DCLK2
ENSG00000180758	374.924	0.379639	0.14389	2.63839	0.00833008	0.0704802	GPR157
ENSG00000125726	78.8365	0.379112	0.135186	2.80437	0.00504144	0.0521662	CD70
ENSG00000165178	1122.89	0.37911	0.113666	3.33531	0.00085205	0.0189641	NCF1C
ENSG00000211653	362.217	0.379014	0.163328	2.32057	0.0203099	0.116311	IGLV1-40
ENSG00000107242	116.457	0.37885	0.112386	3.37097	0.00074905	0.0175407	PIP5K1B
ENSG00000112773	460.001	0.378658	0.0996549	3.7997	0.000144873	0.00697591	TENT5A
ENSG00000160223	1534.93	0.37863	0.141076	2.68387	0.00727754	0.065278	ICOSLG
ENSG00000123965	10.6824	0.378283	0.188115	2.01092	0.0443343	0.180855	PMS2P5
ENSG00000180891	123.84	0.378237	0.191324	1.97694	0.0480485	0.189017	CUEDC1
ENSG00000147912	111.82	0.378069	0.0706567	5.35078	8.75737e-08	0.000107459	FBXO10
ENSG00000229417	61.9326	0.375669	0.122263	3.07264	0.00212172	0.0322748	NPM1P25
ENSG00000168461	2275.8	0.375658	0.170416	2.20436	0.0274989	0.13848	RAB31
ENSG00000211677	2184.16	0.375537	0.162091	2.31683	0.0205132	0.117147	IGLC2
ENSG00000121570	175.121	0.374256	0.127142	2.94361	0.00324412	0.0407586	DPPA4
ENSG00000146540	786.922	0.373023	0.0908378	4.10647	4.01755e-05	0.00375178	C7orf50
ENSG00000278030	190.589	0.373016	0.156792	2.37906	0.017357	0.105716	TRBV7-9
ENSG00000144218	1409.57	0.372761	0.107427	3.46991	0.00052063	0.0143162	AFF3
ENSG00000165025	2975.31	0.372454	0.0890553	4.18227	2.88607e-05	0.0031809	SYK
ENSG00000168961	1556.76	0.372066	0.122095	3.04734	0.00230873	0.0337849	LGALS9
ENSG00000168081	34.0082	0.371825	0.107588	3.45602	0.000548223	0.0148173	PNOC
ENSG00000204103	2780.02	0.371596	0.189356	1.96241	0.0497143	0.192681	MAFB
ENSG00000002549	2010.64	0.371555	0.123691	3.00389	0.0026655	0.0367311	LAP3
ENSG00000205730	663.197	0.371385	0.130399	2.84807	0.00439846	0.0478193	ITPRIPL2
ENSG00000263535	95.8074	0.371037	0.169858	2.18439	0.0289336	0.142704	AK4P1
ENSG00000182240	28.992	0.370872	0.146653	2.52892	0.0114416	0.0841339	BACE2
ENSG00000211695	118.08	0.369899	0.152324	2.42837	0.0151667	0.0980881	TRGV9
ENSG00000159166	210.8	0.369797	0.168985	2.18834	0.028645	0.141883	LAD1
ENSG00000122694	1769.36	0.369716	0.123742	2.9878	0.00280991	0.0377107	GLIPR2
ENSG00000119227	18.9617	0.369553	0.139477	2.64956	0.00805966	0.0691849	PIGZ
ENSG00000019582	23930.5	0.369153	0.0770606	4.79042	1.6643e-06	0.000712398	CD74
ENSG00000225614	134.999	0.369003	0.0906955	4.06859	4.72977e-05	0.00408715	ZNF469
ENSG00000243836	21.4321	0.368872	0.177001	2.08401	0.0371593	0.164254	WDR86-AS1
ENSG00000164440	61.8024	0.368836	0.132358	2.78665	0.00532564	0.0540171	TXLNB
ENSG00000153898	606.488	0.368733	0.119892	3.07555	0.00210116	0.0321479	MCOLN2
ENSG00000081377	57.8236	0.368576	0.134383	2.74272	0.00609324	0.0585073	CDC14B
ENSG00000111490	117.246	0.368449	0.181854	2.02607	0.0427577	0.177361	TBC1D30
ENSG00000120162	475.582	0.368145	0.154891	2.3768	0.0174636	0.106027	MOB3B
ENSG00000268225	20.1576	0.368144	0.129702	2.83839	0.00453414	0.0486337
ENSG00000211597	28.446	0.368089	0.116591	3.15709	0.00159354	0.0274119	IGKJ1
ENSG00000138166	1739.32	0.367787	0.138826	2.64928	0.00806643	0.0691849	DUSP5
ENSG00000269404	487.242	0.366575	0.102476	3.57719	0.000347305	0.0114575	SPIB
ENSG00000165695	34.5202	0.366125	0.182662	2.00439	0.0450284	0.182273	AK8
ENSG00000106804	66.957	0.366046	0.0851325	4.29973	1.7101e-05	0.00228087	C5
ENSG00000105928	457.774	0.365056	0.177154	2.06066	0.039335	0.169332	GSDME
ENSG00000025434	469.926	0.364925	0.174127	2.09574	0.0361053	0.161398	NR1H3
ENSG00000104043	396.719	0.364654	0.156442	2.33092	0.0197573	0.11425	ATP8B4
ENSG00000173258	11.7846	0.364619	0.168175	2.1681	0.0301513	0.146044	ZNF483
ENSG00000100968	75.762	0.36457	0.161281	2.26047	0.0237924	0.127052	NFATC4
ENSG00000167723	41.4999	0.364312	0.161548	2.25513	0.0241251	0.128125	TRPV3
ENSG00000119411	22.6481	0.36431	0.18261	1.99502	0.0460409	0.184184	BSPRY
ENSG00000066336	3150.63	0.364	0.14555	2.50086	0.0123894	0.0879779	SPI1
ENSG00000088325	118.581	0.363865	0.166156	2.1899	0.0285316	0.141627	TPX2
ENSG00000121764	16.5253	0.363234	0.169103	2.14801	0.031713	0.150521	HCRTR1
ENSG00000176092	68.5483	0.363118	0.159551	2.27587	0.0228538	0.124158	CRYBG2
ENSG00000183742	96.1499	0.363018	0.134101	2.70704	0.0067886	0.0626731	MACC1
ENSG00000147234	105.99	0.362953	0.179514	2.02187	0.0431899	0.178273	FRMPD3
ENSG00000164236	717.285	0.362876	0.0939412	3.8628	0.000112095	0.00612233	ANKRD33B
ENSG00000169136	922.884	0.362821	0.158868	2.28379	0.0223841	0.123022	ATF5
ENSG00000242474	32.6514	0.362447	0.137696	2.63222	0.00848297	0.0712956
ENSG00000279656	21.2341	0.361993	0.180094	2.01002	0.0444292	0.181081
ENSG00000196628	2141.06	0.361982	0.0712394	5.0812	3.75053e-07	0.000277596	TCF4
ENSG00000283398	13.4189	0.361577	0.178893	2.02119	0.0432605	0.178296
ENSG00000102445	3137.81	0.361426	0.104671	3.45297	0.00055445	0.0148865	RUBCNL
ENSG00000173040	34.2817	0.360944	0.162865	2.21622	0.0266762	0.135974	EVC2
ENSG00000163694	1496.66	0.360877	0.174896	2.06338	0.0390767	0.168718	RBM47
ENSG00000269720	21.0196	0.360837	0.1435	2.51455	0.0119186	0.0860286	CCDC194
ENSG00000188001	108.187	0.36057	0.145241	2.48255	0.0130444	0.0904656	TPRG1
ENSG00000119714	1362.6	0.360464	0.127849	2.81946	0.00481051	0.0507115	GPR68
ENSG00000196092	2978.61	0.36034	0.1026	3.51209	0.000444604	0.0131566	PAX5
ENSG00000147883	263.291	0.359892	0.184824	1.94722	0.0515085	0.196694	CDKN2B
ENSG00000187486	58.7827	0.359815	0.160524	2.24151	0.0249932	0.130887	KCNJ11
ENSG00000233087	10.5697	0.359788	0.159088	2.26157	0.0237242	0.126902	RAB6D
ENSG00000185507	3027.5	0.359637	0.117897	3.05044	0.00228506	0.033674	IRF7
ENSG00000140044	97.5462	0.359545	0.15619	2.30198	0.0213362	0.11973	JDP2
ENSG00000248971	34.4525	0.359521	0.130592	2.75302	0.00590481	0.0574439	KRT8P46
ENSG00000165259	45.5326	0.358859	0.109358	3.2815	0.00103258	0.02133	HDX
ENSG00000174307	34.6685	0.358841	0.155366	2.30966	0.0209072	0.118552	PHLDA3
ENSG00000128641	124.094	0.358243	0.182688	1.96096	0.0498839	0.193176	MYO1B
ENSG00000146192	1161.13	0.358194	0.0948189	3.77767	0.000158305	0.007358	FGD2
ENSG00000179299	170.262	0.358102	0.140163	2.5549	0.0106217	0.0806531	NSUN7
ENSG00000136810	6341.28	0.358055	0.147104	2.43403	0.0149318	0.0973209	TXN
ENSG00000204428	57.0425	0.357545	0.125728	2.84381	0.00445774	0.0482075	LY6G5C
ENSG00000163995	82.3645	0.357108	0.141903	2.51656	0.0118508	0.0857242	ABLIM2
ENSG00000010278	1449.29	0.356922	0.168167	2.12242	0.0338025	0.156049	CD9
ENSG00000277117	984.052	0.356847	0.130702	2.73024	0.00632891	0.0601705
ENSG00000211943	322.527	0.356843	0.171834	2.07667	0.0378319	0.166007	IGHV3-15
ENSG00000267046	89.0349	0.355897	0.152685	2.33092	0.0197575	0.11425	E2F3P1
ENSG00000261269	81.2291	0.355423	0.175888	2.02074	0.0433066	0.178402
ENSG00000155093	41.0995	0.354746	0.125731	2.82148	0.00478026	0.0504504	PTPRN2
ENSG00000178295	1103.72	0.354088	0.0750773	4.71631	2.40156e-06	0.000866727	GEN1
ENSG00000101384	135.569	0.353576	0.134864	2.62172	0.0087487	0.0722425	JAG1
ENSG00000163520	82.8034	0.353542	0.142988	2.47253	0.013416	0.0916643	FBLN2
ENSG00000274536	75.2473	0.353474	0.132267	2.67242	0.00753064	0.0667545
ENSG00000158457	1157.05	0.352346	0.132087	2.66752	0.00764138	0.0673275	TSPAN33
ENSG00000215784	39.0898	0.351909	0.1654	2.12763	0.0333677	0.155053	FAM72D
ENSG00000196730	1068.56	0.351869	0.140686	2.5011	0.0123809	0.0879779	DAPK1
ENSG00000143369	75.6258	0.351792	0.103552	3.39726	0.000680646	0.0166142	ECM1
ENSG00000178860	779.872	0.351422	0.181141	1.94005	0.0523738	0.198149	MSC
ENSG00000272841	24.4142	0.351152	0.14317	2.4527	0.0141789	0.09442
ENSG00000114450	958.097	0.351081	0.0980848	3.57936	0.000344437	0.0114435	GNB4
ENSG00000116663	423.782	0.351032	0.116375	3.01638	0.00255815	0.0359156	FBXO6
ENSG00000285331	15.5346	0.350138	0.119473	2.93069	0.00338213	0.0415564
ENSG00000144959	628.537	0.350059	0.169665	2.06324	0.03909	0.168736	NCEH1
ENSG00000136960	162.853	0.349919	0.165713	2.1116	0.034721	0.158162	ENPP2
ENSG00000111846	154.962	0.349891	0.110613	3.16319	0.00156049	0.027293	GCNT2
ENSG00000167995	272.012	0.349672	0.161112	2.17037	0.029979	0.145515	BEST1
ENSG00000005471	186.615	0.349602	0.110008	3.17798	0.00148306	0.0263996	ABCB4
ENSG00000005243	15.6788	0.349455	0.157558	2.21794	0.0265589	0.135582	COPZ2
ENSG00000183439	16.6855	0.349349	0.153123	2.28149	0.0225197	0.123362	TRIM61
ENSG00000129116	298.316	0.349068	0.142889	2.44293	0.0145684	0.0959721	PALLD
ENSG00000070614	775.735	0.348522	0.152671	2.28283	0.0224404	0.123185	NDST1
ENSG00000159958	2163.34	0.348208	0.112225	3.10276	0.00191723	0.0306928	TNFRSF13C
ENSG00000121903	66.6657	0.348148	0.0808608	4.30552	1.66593e-05	0.00226495	ZSCAN20
ENSG00000131398	321.616	0.347982	0.104849	3.31888	0.000903782	0.0196533	KCNC3
ENSG00000182389	15.7704	0.347835	0.131229	2.65059	0.00803509	0.0691739	CACNB4
ENSG00000228463	157.354	0.347494	0.142658	2.43586	0.0148564	0.0970357
ENSG00000111344	593.507	0.347473	0.145418	2.38948	0.0168722	0.103967	RASAL1
ENSG00000074416	1520.12	0.347338	0.175685	1.97705	0.0480358	0.189017	MGLL
ENSG00000138639	309.719	0.346917	0.1049	3.30713	0.00094258	0.0200805	ARHGAP24
ENSG00000139318	1902.22	0.346788	0.171992	2.0163	0.0437684	0.179481	DUSP6
ENSG00000085491	980.851	0.346766	0.105814	3.27713	0.00104868	0.0214859	SLC25A24
ENSG00000079931	31.3838	0.346387	0.166283	2.08312	0.03724	0.16438	MOXD1
ENSG00000146376	973.997	0.345059	0.149923	2.30157	0.0213593	0.119823	ARHGAP18
ENSG00000196735	2131.76	0.344994	0.168493	2.04753	0.0406058	0.172705	HLA-DQA1
ENSG00000254325	20.1816	0.344779	0.177671	1.94055	0.0523129	0.198149
ENSG00000243466	526.43	0.344764	0.171206	2.01373	0.0440375	0.180203	IGKV1-5
ENSG00000149292	168.754	0.344721	0.0785456	4.38881	1.13973e-05	0.00185645	TTC12
ENSG00000165874	88.1356	0.344171	0.145736	2.3616	0.0181964	0.10867	SHLD2P1
ENSG00000170396	59.6314	0.343964	0.171009	2.01138	0.0442854	0.180735	ZNF804A
ENSG00000226777	1257.01	0.343868	0.12146	2.83111	0.00463866	0.0493618	FAM30A
ENSG00000167083	69.3388	0.343158	0.122141	2.80951	0.00496169	0.0515959	GNGT2
ENSG00000182487	1044.47	0.342849	0.111267	3.08131	0.00206092	0.0317965	NCF1B
ENSG00000168060	102.696	0.342573	0.0872985	3.92415	8.70352e-05	0.00517875	NAALADL1
ENSG00000092964	914.67	0.342315	0.114554	2.98823	0.00280595	0.0377107	DPYSL2
ENSG00000143869	19.5569	0.34222	0.160948	2.12628	0.0334799	0.15543	GDF7
ENSG00000204396	15.3133	0.342178	0.153509	2.22904	0.025811	0.133187	VWA7
ENSG00000167705	134.693	0.341897	0.136132	2.5115	0.0120219	0.0864692	RILP
ENSG00000181381	3745.5	0.341884	0.114481	2.98639	0.00282295	0.0377337	DDX60L
ENSG00000143079	329.251	0.341862	0.133972	2.55174	0.0107188	0.0810892	CTTNBP2NL
ENSG00000175274	631.391	0.341744	0.0913403	3.74144	0.000182972	0.00781388	TP53I11
ENSG00000228835	15.8522	0.340824	0.158509	2.15019	0.0315404	0.150089
ENSG00000189149	12.3464	0.340756	0.15787	2.15846	0.0308921	0.148157	CRYM-AS1
ENSG00000104432	66.3913	0.340613	0.139077	2.44909	0.0143216	0.0950265	IL7
ENSG00000132205	3582.54	0.340317	0.162291	2.09696	0.0359975	0.161222	EMILIN2
ENSG00000156738	7749.63	0.339969	0.110849	3.06696	0.00216245	0.0326247	MS4A1
ENSG00000265929	23.035	0.339954	0.16901	2.01144	0.0442794	0.180735	MIR5195
ENSG00000010671	1782.07	0.339431	0.0832579	4.07686	4.5648e-05	0.00400094	BTK
ENSG00000205413	4521.29	0.339012	0.0895039	3.78768	0.000152063	0.00715376	SAMD9
ENSG00000240024	53.5489	0.338578	0.0823085	4.11352	3.89666e-05	0.00371009	LINC00888
ENSG00000136237	142.788	0.337889	0.139713	2.41844	0.0155872	0.0993069	RAPGEF5
ENSG00000132357	362.937	0.3376	0.107364	3.14444	0.00166405	0.0281253	CARD6
ENSG00000067141	79.547	0.337358	0.136111	2.47855	0.0131918	0.0909051	NEO1
ENSG00000100365	515.654	0.337039	0.1038	3.24699	0.00116631	0.0232078	NCF4
ENSG00000232815	20.6353	0.336803	0.167363	2.0124	0.0441774	0.180575	DUX4L50
ENSG00000164136	311.963	0.336207	0.109731	3.06394	0.00218446	0.0328222	IL15
ENSG00000272398	636.92	0.335983	0.122814	2.7357	0.00622476	0.0594258	CD24
ENSG00000211598	585.788	0.334813	0.171938	1.94729	0.0514997	0.196694	IGKV4-1
ENSG00000140025	41.9025	0.334347	0.0958833	3.48702	0.000488433	0.0138736	EFCAB11
ENSG00000136856	137.24	0.334201	0.112613	2.96768	0.00300056	0.0391413	SLC2A8
ENSG00000068489	57.4616	0.333952	0.163166	2.0467	0.0406874	0.172748	PRR11
ENSG00000186810	434.318	0.333683	0.111971	2.98008	0.00288172	0.0382745	CXCR3
ENSG00000111275	205.768	0.333622	0.157346	2.12031	0.0339803	0.156282	ALDH2
ENSG00000150045	260.442	0.332982	0.141143	2.35918	0.0183154	0.108923	KLRF1
ENSG00000205056	230.692	0.332883	0.145553	2.28702	0.0221944	0.122455	LINC02397
ENSG00000233665	20.8481	0.332785	0.13379	2.48737	0.0128693	0.0896901
ENSG00000128311	63.405	0.332589	0.112619	2.95322	0.00314481	0.0401972	TST
ENSG00000049246	90.0091	0.332489	0.11963	2.7793	0.00544754	0.0547013	PER3
ENSG00000139618	363.74	0.331729	0.0855656	3.8769	0.000105796	0.00590086	BRCA2
ENSG00000184305	61.7955	0.331468	0.13913	2.38243	0.0171988	0.105027	CCSER1
ENSG00000182195	75.445	0.331331	0.10173	3.25696	0.0011261	0.0226044	LDOC1
ENSG00000160326	966.253	0.331125	0.148175	2.23468	0.0254384	0.132223	SLC2A6
ENSG00000169504	1896.98	0.33063	0.101401	3.26061	0.00111173	0.0224617	CLIC4
ENSG00000107551	953.989	0.330607	0.169558	1.94982	0.0511977	0.196291	RASSF4
ENSG00000111254	21.5435	0.330413	0.142884	2.31245	0.0207528	0.117979	AKAP3
ENSG00000223865	2428.47	0.330382	0.0839157	3.93707	8.24837e-05	0.00516393	HLA-DPB1
ENSG00000131459	153.219	0.330275	0.164249	2.01082	0.0443442	0.180855	GFPT2
ENSG00000242574	1842.32	0.329922	0.0925535	3.56467	0.00036432	0.0117027	HLA-DMB
ENSG00000165996	26.6622	0.329145	0.139431	2.36062	0.0182443	0.108799	HACD1
ENSG00000163534	919.562	0.328708	0.142215	2.31134	0.0208138	0.11824	FCRL1
ENSG00000271503	10283.6	0.328523	0.167312	1.96353	0.0495841	0.19246	CCL5
ENSG00000187391	11.6477	0.328166	0.165978	1.97717	0.0480229	0.189017	MAGI2
ENSG00000122966	56.5008	0.327653	0.136671	2.39739	0.0165123	0.102643	CIT
ENSG00000104312	1196.77	0.327641	0.150831	2.17224	0.0298378	0.145021	RIPK2
ENSG00000271851	36.646	0.32755	0.111037	2.9499	0.00317873	0.0403501
ENSG00000120875	2288.54	0.327319	0.150735	2.17149	0.0298938	0.145217	DUSP4
ENSG00000211978	55.032	0.327061	0.13471	2.4279	0.0151867	0.0981792	IGHV5-78
ENSG00000139974	377.945	0.327029	0.131041	2.49563	0.0125734	0.0884654	SLC38A6
ENSG00000083444	486.342	0.326633	0.124144	2.63108	0.00851151	0.0713659	PLOD1
ENSG00000211644	343.381	0.326592	0.163048	2.00304	0.0451733	0.182578	IGLV1-51
ENSG00000135074	1996.33	0.326537	0.0957076	3.41182	0.00064531	0.0162862	ADAM19
ENSG00000279320	60.5278	0.325724	0.11693	2.78563	0.00534242	0.0540289
ENSG00000173890	248.188	0.325402	0.130169	2.49984	0.0124248	0.0880935	GPR160
ENSG00000186806	35.9405	0.325085	0.128761	2.52473	0.0115788	0.0847391	VSIG10L
ENSG00000196684	2008.9	0.325007	0.0712259	4.56305	5.04159e-06	0.0012036	HSH2D
ENSG00000164850	29.8518	0.324994	0.165252	1.96666	0.0492222	0.191378	GPER1
ENSG00000167613	1582.15	0.324763	0.146998	2.2093	0.0271536	0.13738	LAIR1
ENSG00000167123	77.3299	0.324401	0.137132	2.36561	0.0180003	0.107779	CERCAM
ENSG00000240859	40.5871	0.324269	0.140041	2.31553	0.0205837	0.117368
ENSG00000196116	823.825	0.324183	0.0841189	3.85386	0.000116268	0.006221	TDRD7
ENSG00000115956	6810.2	0.323718	0.136861	2.36531	0.0180148	0.107831	PLEK
ENSG00000185614	28.0074	0.323557	0.130628	2.47693	0.0132517	0.0911421	INKA1
ENSG00000102221	242.117	0.323418	0.0801567	4.03482	5.46437e-05	0.00427988	JADE3
ENSG00000130775	2268.52	0.323187	0.132211	2.44448	0.0145062	0.095736	THEMIS2
ENSG00000148175	2154.1	0.323061	0.126687	2.55008	0.01077	0.0812175	STOM
ENSG00000029153	519.426	0.322978	0.141998	2.27452	0.0229345	0.124339	ARNTL2
ENSG00000185291	3638.54	0.322192	0.165244	1.9498	0.0512003	0.196291	IL3RA
ENSG00000214595	183.018	0.321921	0.102371	3.14464	0.0016629	0.0281253	EML6
ENSG00000117461	87.2939	0.321809	0.122824	2.62009	0.00879077	0.0724789	PIK3R3
ENSG00000211945	412.24	0.321604	0.158596	2.02781	0.0425794	0.176882	IGHV1-18
ENSG00000188130	37.6036	0.321234	0.136727	2.34946	0.0188006	0.110592	MAPK12
ENSG00000182511	593.925	0.321126	0.142668	2.25086	0.0243945	0.128913	FES
ENSG00000044115	2329.03	0.321022	0.128392	2.50033	0.0124079	0.0880413	CTNNA1
ENSG00000012048	181.884	0.321017	0.0758535	4.23207	2.31552e-05	0.00274965	BRCA1
ENSG00000179583	2741.55	0.320561	0.076176	4.20817	2.57452e-05	0.0029251	CIITA
ENSG00000113273	502.654	0.320283	0.107725	2.97314	0.00294771	0.0387549	ARSB
ENSG00000270959	19.5187	0.31975	0.153755	2.0796	0.0375623	0.165248	LPP-AS2
ENSG00000264781	284.531	0.319624	0.113187	2.82386	0.00474485	0.0502785	MIR4537
ENSG00000228672	109.876	0.319241	0.111742	2.85696	0.00427715	0.0470335	PROB1
ENSG00000211955	620.949	0.319207	0.141422	2.25712	0.0240005	0.127785	IGHV3-33
ENSG00000146592	126.98	0.319157	0.150476	2.12099	0.033923	0.156188	CREB5
ENSG00000231991	445.428	0.319156	0.141852	2.24993	0.0244535	0.129151	ANXA2P2
ENSG00000143061	147.357	0.318956	0.132261	2.41157	0.0158841	0.100468	IGSF3
ENSG00000169554	4338.27	0.31875	0.124304	2.56428	0.0103391	0.0794024	ZEB2
ENSG00000198400	24.261	0.31869	0.1345	2.36944	0.017815	0.107158	NTRK1
ENSG00000044459	92.7446	0.317739	0.114049	2.78598	0.00533669	0.0540171	CNTLN
ENSG00000164687	602.487	0.31752	0.117991	2.69105	0.00712265	0.0645492	FABP5
ENSG00000163697	254.164	0.317235	0.138818	2.28527	0.0222971	0.122801	APBB2
ENSG00000125657	70.5859	0.316947	0.154951	2.04546	0.0408092	0.172913	TNFSF9
ENSG00000162946	150.418	0.316704	0.100539	3.15005	0.00163244	0.0277549	DISC1
ENSG00000103811	3875.13	0.316038	0.155991	2.026	0.0427647	0.177361	CTSH
ENSG00000169981	108.435	0.315954	0.068158	4.6356	3.55896e-06	0.00105474	ZNF35
ENSG00000142512	178.755	0.315598	0.14902	2.11781	0.0341909	0.156937	SIGLEC10
ENSG00000091490	1164.32	0.314778	0.07679	4.09921	4.14571e-05	0.00383447	SEL1L3
ENSG00000214711	32.2211	0.314644	0.124726	2.52269	0.0116462	0.0851564	CAPN14
ENSG00000277534	30.6296	0.314622	0.103725	3.03324	0.0024194	0.0347629
ENSG00000066294	2885.52	0.314306	0.162166	1.93818	0.0526017	0.19848	CD84
ENSG00000171992	207.007	0.314295	0.108819	2.88824	0.00387405	0.0447514	SYNPO
ENSG00000277149	179.498	0.314198	0.127047	2.4731	0.0133948	0.0916183	TYW1B
ENSG00000231770	34.883	0.313854	0.115514	2.71703	0.00658704	0.0613257	TMEM44-AS1
ENSG00000185432	664.695	0.313764	0.117034	2.68096	0.00734104	0.0655437	METTL7A
ENSG00000186446	87.8499	0.313711	0.086316	3.63445	0.000278575	0.0100934	ZNF501
ENSG00000051341	44.9826	0.313483	0.153426	2.04322	0.0410304	0.173411	POLQ
ENSG00000165168	15811.2	0.313301	0.155683	2.01242	0.0441753	0.180575	CYBB
ENSG00000205978	14.4342	0.312905	0.14673	2.13253	0.0329636	0.153965	NYNRIN
ENSG00000143382	391.885	0.312578	0.137298	2.27664	0.0228077	0.123984	ADAMTSL4
ENSG00000165959	325.878	0.311949	0.106718	2.92312	0.00346542	0.0423255	CLMN
ENSG00000183785	11.7279	0.311939	0.152964	2.03929	0.0414212	0.174382	TUBA8
ENSG00000197943	3039.64	0.311094	0.0824116	3.77489	0.000160081	0.00738459	PLCG2
ENSG00000094804	38.4406	0.310187	0.11822	2.62382	0.00869504	0.0720365	CDC6
ENSG00000135083	78.9501	0.31018	0.148015	2.09559	0.0361182	0.161398	CCNJL
ENSG00000164904	32.4749	0.310104	0.137118	2.26158	0.0237234	0.126902	ALDH7A1
ENSG00000092853	52.9085	0.3097	0.117001	2.64697	0.0081216	0.0694961	CLSPN
ENSG00000155629	5327.88	0.309665	0.125039	2.47654	0.0132662	0.0911791	PIK3AP1
ENSG00000107719	56.1958	0.309442	0.159408	1.9412	0.0522342	0.198109	PALD1
ENSG00000120280	544.162	0.309164	0.0757411	4.08185	4.46784e-05	0.0040005	CXorf21
ENSG00000134508	394.721	0.308497	0.100184	3.0793	0.00207485	0.0319136	CABLES1
ENSG00000255240	105.531	0.308161	0.144803	2.12813	0.0333261	0.154938
ENSG00000231964	53.5103	0.308095	0.139914	2.20203	0.0276633	0.138996
ENSG00000197872	972.504	0.307835	0.107464	2.86454	0.00417614	0.0464625	FAM49A
ENSG00000177602	91.525	0.307754	0.108166	2.84519	0.00443846	0.0480989	HASPIN
ENSG00000105369	3593.28	0.307445	0.104629	2.93843	0.00329882	0.0411472	CD79A
ENSG00000177455	1345.38	0.307018	0.103025	2.98004	0.00288213	0.0382745	CD19
ENSG00000152492	1636.09	0.306596	0.0600279	5.10755	3.2636e-07	0.000270878	CCDC50
ENSG00000235621	86.0033	0.306433	0.148769	2.05979	0.0394182	0.169475	LINC00494
ENSG00000178201	20.4277	0.306414	0.121168	2.52884	0.0114441	0.0841339	VN1R1
ENSG00000234964	341.821	0.305273	0.116573	2.61873	0.00882584	0.0724866	FABP5P7
ENSG00000124549	128.586	0.304919	0.067964	4.48648	7.24092e-06	0.00143308	BTN2A3P
ENSG00000114904	542.126	0.304906	0.063915	4.77049	1.8378e-06	0.000768785	NEK4
ENSG00000122986	712.195	0.304667	0.103212	2.95186	0.00315869	0.0402067	HVCN1
ENSG00000151240	95.8306	0.304332	0.143286	2.12394	0.0336752	0.155877	DIP2C
ENSG00000198113	538.259	0.304239	0.132844	2.29019	0.0220101	0.121767	TOR4A
ENSG00000182718	8561.68	0.304017	0.145511	2.0893	0.0366805	0.162959	ANXA2
ENSG00000182472	67.9497	0.303747	0.114267	2.65822	0.00785542	0.0683517	CAPN12
ENSG00000152056	135.678	0.303423	0.0999613	3.0354	0.00240216	0.0346675	AP1S3
ENSG00000185436	451.633	0.303377	0.080106	3.7872	0.000152356	0.00715376	IFNLR1
ENSG00000134470	373.29	0.303185	0.143805	2.1083	0.0350049	0.158695	IL15RA
ENSG00000140836	312.494	0.303047	0.124516	2.43379	0.0149415	0.0973501	ZFHX3
ENSG00000160856	2196.34	0.302647	0.146889	2.06038	0.0393619	0.169354	FCRL3
ENSG00000160293	668.251	0.30264	0.0798129	3.79186	0.000149521	0.00711133	VAV2
ENSG00000115355	2585.76	0.302588	0.118775	2.54758	0.0108474	0.0815449	CCDC88A
ENSG00000211900	115.719	0.301764	0.111079	2.71667	0.00659429	0.0613622	IGHJ6
ENSG00000182621	111.508	0.30127	0.117221	2.57011	0.0101668	0.0785838	PLCB1
ENSG00000138413	706.125	0.30123	0.109775	2.74407	0.00606827	0.0584778	IDH1
ENSG00000268568	19.9427	0.30092	0.133621	2.25204	0.0243197	0.128777
ENSG00000089177	227.968	0.300593	0.075633	3.97435	7.05704e-05	0.00490057	KIF16B
ENSG00000140968	2948.86	0.300576	0.0921317	3.26246	0.0011045	0.0223401	IRF8
ENSG00000198915	55.5478	0.300092	0.118982	2.52216	0.0116636	0.0851564	RASGEF1A
ENSG00000238113	72.6044	0.299965	0.125909	2.3824	0.0172001	0.105027	LINC01410
ENSG00000205045	1038.72	0.299918	0.126741	2.36639	0.0179627	0.107659	SLFN12L
ENSG00000152804	456.655	0.299734	0.0896092	3.34491	0.0008231	0.0185661	HHEX
ENSG00000119508	1025.25	0.299602	0.104502	2.86695	0.00414454	0.0462504	NR4A3
ENSG00000143554	721.163	0.298299	0.125433	2.37816	0.0173993	0.105834	SLC27A3
ENSG00000133816	495.455	0.297865	0.137151	2.1718	0.0298704	0.145141	MICAL2
ENSG00000116514	1890.4	0.297785	0.143999	2.06797	0.0386426	0.16775	RNF19B
ENSG00000062282	71.4626	0.297578	0.12986	2.29153	0.0219326	0.121484	DGAT2
ENSG00000128604	1467.85	0.297566	0.107543	2.76696	0.00565822	0.0559619	IRF5
ENSG00000188822	375.459	0.297488	0.0893561	3.32924	0.000870821	0.0192417	CNR2
ENSG00000187210	312.925	0.296979	0.0906272	3.27693	0.00104943	0.0214859	GCNT1
ENSG00000103381	506.534	0.296755	0.11637	2.55011	0.010769	0.0812175	CPPED1
ENSG00000138185	624.238	0.296621	0.0864316	3.43186	0.000599457	0.0156062	ENTPD1
ENSG00000197385	86.2483	0.296468	0.137606	2.15447	0.0312036	0.149096	ZNF860
ENSG00000049249	332.24	0.296433	0.123845	2.39359	0.0166843	0.103259	TNFRSF9
ENSG00000146094	1400.78	0.295948	0.142526	2.07644	0.0378529	0.166007	DOK3
ENSG00000152217	484.639	0.295501	0.108627	2.72032	0.00652179	0.061134	SETBP1
ENSG00000108798	604.729	0.295279	0.122907	2.40246	0.016285	0.101711	ABI3
ENSG00000115159	979.421	0.294796	0.106586	2.7658	0.00567835	0.0560729	GPD2
ENSG00000196914	613.552	0.294487	0.0620348	4.74712	2.0633e-06	0.000808025	ARHGEF12
ENSG00000107438	446.37	0.294358	0.0841139	3.49952	0.000466096	0.0135577	PDLIM1
ENSG00000136040	1988.12	0.293785	0.139742	2.10233	0.035524	0.159867	PLXNC1
ENSG00000204252	1001.34	0.293757	0.0919137	3.19601	0.00139343	0.0257953	HLA-DOA
ENSG00000026751	8275.73	0.29375	0.149212	1.96868	0.0489903	0.190718	SLAMF7
ENSG00000166548	133.161	0.293423	0.111734	2.62608	0.0086375	0.0717751	TK2
ENSG00000158122	261.963	0.293413	0.0962461	3.04857	0.00229931	0.0337758	PRXL2C
ENSG00000100721	1352.96	0.293338	0.143466	2.04465	0.0408889	0.17316	TCL1A
ENSG00000173193	8895.42	0.293282	0.0875632	3.34937	0.000809948	0.0184216	PARP14
ENSG00000167460	6019.12	0.29319	0.0917424	3.1958	0.00139445	0.0257953	TPM4
ENSG00000090339	2117.11	0.293057	0.149061	1.96602	0.0492967	0.191614	ICAM1
ENSG00000184988	584.923	0.293026	0.102299	2.86442	0.00417774	0.0464625	TMEM106A
ENSG00000267554	234.552	0.292805	0.12285	2.38343	0.017152	0.105023
ENSG00000232677	288.577	0.292624	0.110117	2.6574	0.0078747	0.068401	LINC00665
ENSG00000163191	3722.39	0.292355	0.141367	2.06805	0.0386356	0.16775	S100A11
ENSG00000266028	1513.13	0.292307	0.0779525	3.74981	0.000176971	0.00773049	SRGAP2
ENSG00000091436	842.491	0.292169	0.144906	2.01626	0.0437732	0.179481	MAP3K20
ENSG00000058091	591.024	0.291902	0.120767	2.41706	0.0156464	0.099582	CDK14
ENSG00000213846	54.9235	0.291782	0.120511	2.42121	0.0154689	0.0988614
ENSG00000070190	1261.36	0.291588	0.0586594	4.97087	6.66544e-07	0.000407007	DAPP1
ENSG00000115271	626.168	0.291528	0.103753	2.80982	0.00495692	0.0515959	GCA
ENSG00000178075	304.371	0.291488	0.129473	2.25135	0.0243636	0.128824	GRAMD1C
ENSG00000110042	863.28	0.290699	0.102392	2.83909	0.0045243	0.0485657	DTX4
ENSG00000057657	1014.11	0.290539	0.119098	2.4395	0.0147077	0.0965442	PRDM1
ENSG00000106266	1256.54	0.290478	0.0955626	3.03966	0.00236845	0.0344342	SNX8
ENSG00000106605	305.619	0.290459	0.119683	2.42691	0.0152282	0.0983131	BLVRA
ENSG00000157483	1315.89	0.290353	0.115322	2.51775	0.0118108	0.0856876	MYO1E
ENSG00000280003	17.1403	0.289724	0.134031	2.16162	0.0306475	0.147477
ENSG00000075275	495.144	0.289697	0.098365	2.94512	0.00322824	0.0406682	CELSR1
ENSG00000187741	191.382	0.289661	0.0800499	3.61851	0.000296306	0.0104514	FANCA
ENSG00000273472	63.7821	0.289406	0.12927	2.23878	0.0251702	0.131502
ENSG00000171428	164.681	0.289267	0.0569401	5.0802	3.77045e-07	0.000277596	NAT1
ENSG00000145246	529.15	0.288842	0.0822247	3.51284	0.000443346	0.0131566	ATP10D
ENSG00000176788	2267.61	0.288805	0.146903	1.96596	0.0493038	0.191614	BASP1
ENSG00000059377	562.938	0.288597	0.139456	2.06945	0.0385036	0.167462	TBXAS1
ENSG00000155980	27.9112	0.288517	0.144167	2.00127	0.0453633	0.183036	KIF5A
ENSG00000172403	58.3978	0.288379	0.123539	2.33431	0.0195793	0.11372	SYNPO2
ENSG00000157657	92.2938	0.288344	0.114025	2.52879	0.0114458	0.0841339	ZNF618
ENSG00000110218	422.256	0.287791	0.103774	2.77324	0.00555014	0.055369	PANX1
ENSG00000136193	666.811	0.287122	0.072746	3.94691	7.91665e-05	0.00510096	SCRN1
ENSG00000114993	82.6247	0.286908	0.0987409	2.90566	0.00366476	0.0437158	RTKN
ENSG00000174125	943.493	0.286815	0.0998414	2.8727	0.0040698	0.0459281	TLR1
ENSG00000204257	1595.92	0.28632	0.0779816	3.67164	0.000241001	0.00924138	HLA-DMA
ENSG00000147400	272.554	0.286318	0.0753053	3.80209	0.000143479	0.00694969	CETN2
ENSG00000232118	15.1129	0.285658	0.138998	2.05513	0.0398669	0.170808	BACH1-AS1
ENSG00000137710	1887.82	0.28565	0.146691	1.94728	0.0515007	0.196694	RDX
ENSG00000123427	97.1601	0.285643	0.12878	2.21807	0.0265502	0.135582	EEF1AKMT3
ENSG00000168026	208.698	0.28562	0.0828756	3.44637	0.000568168	0.0151781	TTC21A
ENSG00000020577	130.699	0.285249	0.142958	1.99533	0.0460072	0.184169	SAMD4A
ENSG00000155962	68.6924	0.28472	0.140008	2.03359	0.0419926	0.175423	CLIC2
ENSG00000159176	834.011	0.284557	0.0873342	3.25826	0.00112099	0.0225799	CSRP1
ENSG00000136161	949.313	0.284479	0.146687	1.93936	0.0524575	0.198245	RCBTB2
ENSG00000138801	1444.76	0.284087	0.100964	2.81376	0.00489664	0.05129	PAPSS1
ENSG00000228427	56.1651	0.283651	0.0881339	3.21841	0.00128901	0.0245861
ENSG00000007312	944.919	0.283351	0.104519	2.71099	0.00670829	0.0622342	CD79B
ENSG00000196562	136.395	0.283322	0.142937	1.98214	0.0474633	0.187711	SULF2
ENSG00000211829	645.821	0.283265	0.115003	2.4631	0.0137741	0.0929372	TRDC
ENSG00000134539	3453.96	0.283143	0.143808	1.96889	0.0489659	0.190718	KLRD1
ENSG00000172123	276.613	0.282661	0.0932376	3.03162	0.00243244	0.0348257	SLFN12
ENSG00000198771	3924.79	0.282505	0.0989122	2.85612	0.00428859	0.047096	RCSD1
ENSG00000171757	28.1045	0.282488	0.126011	2.24176	0.0249767	0.130863	LRRC34
ENSG00000160219	996.92	0.282451	0.118194	2.38973	0.016861	0.103933	GAB3
ENSG00000112195	193.527	0.282449	0.138227	2.04337	0.0410156	0.173388	TREML2
ENSG00000100979	35.7488	0.281922	0.140121	2.01198	0.0442217	0.180676	PLTP
ENSG00000135931	141.401	0.281519	0.1334	2.11034	0.0348295	0.158359	ARMC9
ENSG00000146535	2350.58	0.281337	0.0882743	3.18707	0.00143721	0.0261914	GNA12
ENSG00000139174	64.642	0.281292	0.112678	2.49642	0.0125455	0.0884284	PRICKLE1
ENSG00000170456	512.847	0.281259	0.0822004	3.42163	0.000622464	0.0159569	DENND5B
ENSG00000163131	8008.88	0.281121	0.121896	2.30623	0.0210976	0.119081	CTSS
ENSG00000153094	3208.22	0.281018	0.0528698	5.31529	1.06486e-07	0.000118068	BCL2L11
ENSG00000257176	88.8417	0.280666	0.11714	2.396	0.0165753	0.102826
ENSG00000225331	45.2265	0.280536	0.139788	2.00687	0.0447632	0.181959	LINC01678
ENSG00000177873	175.132	0.280341	0.0560456	5.00202	5.67324e-07	0.000372935	ZNF619
ENSG00000177311	1682.21	0.280251	0.090737	3.08861	0.00201093	0.0315037	ZBTB38
ENSG00000160233	107.129	0.279527	0.11886	2.35173	0.0186863	0.110131	LRRC3
ENSG00000165716	68.3005	0.279482	0.124821	2.23906	0.0251518	0.131481	DIPK1B
ENSG00000170899	17.8994	0.279362	0.138175	2.02179	0.0431978	0.178273	GSTA4
ENSG00000107201	2085.69	0.279222	0.0870278	3.20842	0.00133466	0.0251697	DDX58
ENSG00000127838	839.884	0.278986	0.115579	2.41381	0.0157867	0.100162	PNKD
ENSG00000125510	58.3539	0.278363	0.122268	2.27667	0.022806	0.123984	OPRL1
ENSG00000042286	371.158	0.276588	0.0901236	3.06899	0.00214784	0.0325375	AIFM2
ENSG00000101003	45.6778	0.276336	0.107488	2.57086	0.0101447	0.0785838	GINS1
ENSG00000171476	305.822	0.27626	0.132656	2.08253	0.0372937	0.16438	HOPX
ENSG00000162144	1631.05	0.27591	0.0889345	3.1024	0.0019196	0.0306969	CYB561A3
ENSG00000101160	5963.11	0.275786	0.134119	2.05628	0.0397558	0.170458	CTSZ
ENSG00000138496	4996.85	0.275662	0.108312	2.54506	0.0109259	0.0819197	PARP9
ENSG00000132965	819.352	0.275595	0.134214	2.0534	0.0400335	0.171082	ALOX5AP
ENSG00000165118	251.449	0.275491	0.0689794	3.99382	6.50185e-05	0.00474893	C9orf64
ENSG00000100342	1224.83	0.275328	0.103724	2.65441	0.00794465	0.068749	APOL1
ENSG00000073111	299.082	0.275145	0.0705747	3.89863	9.67381e-05	0.00557379	MCM2
ENSG00000072422	33.2089	0.274801	0.135075	2.03442	0.0419088	0.175352	RHOBTB1
ENSG00000183735	1210.03	0.274475	0.0890568	3.08202	0.00205604	0.0317913	TBK1
ENSG00000105948	52.8615	0.274229	0.0818889	3.34879	0.000811648	0.0184216	TTC26
ENSG00000248309	28.6765	0.2742	0.134674	2.03603	0.0417477	0.174917	MEF2C-AS1
ENSG00000197965	910.509	0.27414	0.103036	2.66063	0.00779945	0.0680686	MPZL1
ENSG00000127946	1944.9	0.273711	0.141095	1.93991	0.0523911	0.198173	HIP1
ENSG00000163683	1429.33	0.273532	0.084947	3.22004	0.00128175	0.0244983	SMIM14
ENSG00000137747	76.5715	0.271553	0.0930143	2.91947	0.00350624	0.0426453	TMPRSS13
ENSG00000160678	22.7047	0.271538	0.108969	2.49188	0.0127069	0.0889966	S100A1
ENSG00000109458	331.654	0.271063	0.0734496	3.69047	0.000223843	0.00887943	GAB1
ENSG00000095585	744.54	0.270741	0.0717481	3.7735	0.000160974	0.00739458	BLNK
ENSG00000259086	19.2575	0.270324	0.120667	2.24026	0.025074	0.131125
ENSG00000136895	17.3096	0.269783	0.136136	1.98171	0.0475115	0.187781	GARNL3
ENSG00000278740	27.8652	0.2691	0.138397	1.94441	0.0518461	0.197592
ENSG00000243156	491.879	0.268967	0.0741742	3.62616	0.000287666	0.0103011	MICAL3
ENSG00000241839	2990.23	0.268596	0.127336	2.10935	0.0349145	0.158487	PLEKHO2
ENSG00000185482	83.4029	0.268083	0.107479	2.49428	0.0126214	0.0886709	STAC3
ENSG00000142657	8188.05	0.268002	0.131781	2.03369	0.041983	0.175423	PGD
ENSG00000198910	161.128	0.267934	0.126959	2.1104	0.0348236	0.158359	L1CAM
ENSG00000281357	18.1235	0.267571	0.110133	2.42952	0.0151189	0.0980198	ARRDC3-AS1
ENSG00000181192	882.123	0.267401	0.0570579	4.68648	2.77943e-06	0.00093015	DHTKD1
ENSG00000125247	436.713	0.266726	0.0787447	3.38722	0.000706041	0.0170097	TMTC4
ENSG00000123130	1117.39	0.266361	0.0923004	2.88581	0.00390408	0.0448619	ACOT9
ENSG00000110080	211.502	0.266361	0.0842424	3.16184	0.00156778	0.0273118	ST3GAL4
ENSG00000188185	122.018	0.26633	0.0850578	3.13117	0.00174114	0.0288976	LINC00265
ENSG00000196368	35.2676	0.266067	0.129678	2.05175	0.0401936	0.171489	NUDT11
ENSG00000110880	2987.13	0.265661	0.137064	1.93823	0.0525952	0.19848	CORO1C
ENSG00000138623	1314.68	0.265419	0.106307	2.49673	0.0125343	0.0883955	SEMA7A
ENSG00000163376	729.366	0.265072	0.068209	3.88617	0.000101839	0.00573	KBTBD8
ENSG00000137185	160.129	0.264674	0.0697331	3.79553	0.000147326	0.00704334	ZSCAN9
ENSG00000253276	643.355	0.264369	0.0756592	3.49421	0.000475464	0.0136955	CCDC71L
ENSG00000211899	34548.6	0.264325	0.0932031	2.83601	0.00456809	0.0488554	IGHM
ENSG00000127990	106.444	0.264259	0.120986	2.18422	0.0289461	0.142704	SGCE
ENSG00000139187	237.413	0.264193	0.13399	1.97174	0.0486389	0.190067	KLRG1
ENSG00000198431	7960.14	0.263926	0.127601	2.06837	0.0386057	0.167747	TXNRD1
ENSG00000104320	2446.32	0.2636	0.09243	2.85189	0.00434604	0.0474456	NBN
ENSG00000183087	141.331	0.263409	0.116319	2.26455	0.0235404	0.126249	GAS6
ENSG00000177156	6052.95	0.262466	0.118501	2.21489	0.0267674	0.136326	TALDO1
ENSG00000035720	428.389	0.26241	0.0850419	3.08565	0.00203107	0.031601	STAP1
ENSG00000153064	2232.14	0.262288	0.103197	2.54162	0.011034	0.0824574	BANK1
ENSG00000005020	1349.27	0.261849	0.0900432	2.90803	0.00363709	0.043612	SKAP2
ENSG00000172183	2481.49	0.261679	0.0751971	3.47991	0.000501583	0.014052	ISG20
ENSG00000166501	3836.63	0.260944	0.0688002	3.79278	0.00014897	0.00710347	PRKCB
ENSG00000163754	586.739	0.26091	0.0825514	3.16057	0.0015746	0.0273816	GYG1
ENSG00000134690	63.712	0.260022	0.120455	2.15867	0.0308755	0.148157	CDCA8
ENSG00000158089	20.7476	0.259794	0.130643	1.98857	0.0467487	0.186006	GALNT14
ENSG00000001036	227.87	0.259701	0.118607	2.1896	0.0285533	0.141658	FUCA2
ENSG00000132359	156.481	0.25962	0.126363	2.05455	0.0399223	0.170846	RAP1GAP2
ENSG00000108405	602.261	0.259322	0.108541	2.38915	0.0168873	0.103996	P2RX1
ENSG00000115129	88.4547	0.259156	0.106208	2.44007	0.0146845	0.096495	TP53I3
ENSG00000109501	125.387	0.259035	0.120061	2.15752	0.0309651	0.148287	WFS1
ENSG00000112149	7734.22	0.258931	0.0965842	2.68089	0.00734277	0.0655437	CD83
ENSG00000102384	29.7114	0.258147	0.109933	2.34822	0.0188634	0.110852	CENPI
ENSG00000105963	258.787	0.258024	0.11654	2.21404	0.0268262	0.136484	ADAP1
ENSG00000121064	583.158	0.258015	0.110717	2.33041	0.0197844	0.114333	SCPEP1
ENSG00000198538	569.853	0.257936	0.0476202	5.41653	6.0767e-08	0.000107459	ZNF28
ENSG00000149639	1011.22	0.257669	0.0689143	3.73898	0.000184765	0.00783591	SOGA1
ENSG00000109113	192.49	0.257248	0.112674	2.28311	0.0224239	0.123131	RAB34
ENSG00000213859	237.146	0.257132	0.0775619	3.31519	0.00091581	0.0197941	KCTD11
ENSG00000070214	1693.38	0.257019	0.100919	2.54678	0.0108723	0.0816797	SLC44A1
ENSG00000129993	217.182	0.256845	0.0807404	3.18112	0.00146705	0.0263401	CBFA2T3
ENSG00000263142	308.731	0.256799	0.119087	2.1564	0.0310525	0.148571	LRRC37A17P
ENSG00000150457	436.467	0.256142	0.115114	2.22512	0.0260732	0.134095	LATS2
ENSG00000141664	1759.89	0.256103	0.060785	4.21325	2.51719e-05	0.00289571	ZCCHC2
ENSG00000204673	674.261	0.255716	0.0867236	2.94863	0.0031919	0.0404615	AKT1S1
ENSG00000005187	332.693	0.255588	0.115899	2.20526	0.027436	0.138353	ACSM3
ENSG00000223984	14.9486	0.254715	0.114823	2.21832	0.0265328	0.135582	HNRNPRP1
ENSG00000155966	169.622	0.254352	0.0989411	2.57074	0.0101481	0.0785838	AFF2
ENSG00000086062	3659.42	0.253852	0.0673248	3.77056	0.000162882	0.00741783	B4GALT1
ENSG00000135862	452.375	0.253672	0.0934693	2.71396	0.00664832	0.061709	LAMC1
ENSG00000101888	383.151	0.253603	0.0665311	3.81179	0.000137962	0.00676666	NXT2
ENSG00000186665	91.6654	0.253546	0.0802359	3.16001	0.00157763	0.0273816	C17orf58
ENSG00000073060	310.047	0.253509	0.118325	2.14248	0.0321551	0.151893	SCARB1
ENSG00000155307	3682.83	0.253421	0.127878	1.98174	0.047508	0.187781	SAMSN1
ENSG00000186088	1696.37	0.253373	0.0886888	2.85687	0.00427837	0.0470335	GSAP
ENSG00000228878	37.9624	0.252983	0.101098	2.50237	0.0123365	0.0879682	SEPT7-AS1
ENSG00000145088	171.367	0.252659	0.0963238	2.62302	0.00871537	0.0721236	EAF2
ENSG00000127947	4076.98	0.252438	0.110559	2.28328	0.0224136	0.123111	PTPN12
ENSG00000080200	258.497	0.252412	0.108279	2.33113	0.0197464	0.11425	CRYBG3
ENSG00000163840	4996.06	0.252387	0.0844062	2.99015	0.00278843	0.0375723	DTX3L
ENSG00000162062	18.4101	0.252072	0.120644	2.08938	0.0366735	0.162959	TEDC2
ENSG00000111885	2058.55	0.25161	0.0626244	4.01777	5.87512e-05	0.00439689	MAN1A1
ENSG00000145476	492.763	0.251261	0.116045	2.1652	0.0303722	0.146612	CYP4V2
ENSG00000173548	103.923	0.251222	0.107238	2.34266	0.0191468	0.111949	SNX33
ENSG00000175505	346.843	0.250442	0.0817965	3.06177	0.00220036	0.0329961	CLCF1
ENSG00000048028	1874.41	0.250347	0.0854665	2.92918	0.00339854	0.0416068	USP28
ENSG00000180543	237.248	0.25024	0.105884	2.36334	0.0181112	0.108232	TSPYL5
ENSG00000182022	1201.64	0.250066	0.127984	1.95388	0.0507151	0.19526	CHST15
ENSG00000138160	176.801	0.249948	0.121078	2.06435	0.0389843	0.168596	KIF11
ENSG00000255200	26.9516	0.249421	0.112498	2.21711	0.0266154	0.135702	PGAM1P8
ENSG00000156273	4256.85	0.249239	0.107081	2.32757	0.0199352	0.11488	BACH1
ENSG00000166228	161.931	0.248743	0.100957	2.46386	0.0137451	0.092831	PCBD1
ENSG00000079263	1856.65	0.248246	0.0622729	3.98642	6.70776e-05	0.00478622	SP140
ENSG00000128394	660.448	0.247879	0.0665174	3.72654	0.000194129	0.00815786	APOBEC3F
ENSG00000247982	3196.7	0.247774	0.127823	1.93842	0.0525725	0.19848	LINC00926
ENSG00000188786	2486.53	0.247668	0.118477	2.09043	0.036579	0.162823	MTF1
ENSG00000224614	32.4059	0.247595	0.125299	1.97604	0.0481504	0.189228	TNK2-AS1
ENSG00000171132	605.791	0.247565	0.0731081	3.38628	0.000708471	0.0170459	PRKCE
ENSG00000170684	113.813	0.247536	0.073176	3.38275	0.000717641	0.01711	ZNF296
ENSG00000114346	161.086	0.247312	0.0955927	2.58714	0.00967759	0.0765474	ECT2
ENSG00000141179	272.526	0.247073	0.0915073	2.70004	0.00693312	0.0633934	PCTP
ENSG00000183508	1900.27	0.247053	0.0773654	3.19332	0.00140645	0.0258872	TENT5C
ENSG00000239713	2961.25	0.246913	0.0799775	3.08727	0.00202001	0.0315812	APOBEC3G
ENSG00000160999	196.919	0.246599	0.0940234	2.62274	0.00872255	0.0721236	SH2B2
ENSG00000101017	1333	0.246334	0.0828942	2.97167	0.00296189	0.0388099	CD40
ENSG00000249978	104.299	0.246289	0.115975	2.12365	0.0336998	0.155877	TRGV7
ENSG00000260686	61.0934	0.245745	0.0914594	2.68694	0.00721108	0.0648828
ENSG00000229474	751.528	0.245006	0.0991991	2.46984	0.0135174	0.0920122	PATL2
ENSG00000107968	1570.6	0.244769	0.0996275	2.45684	0.0140166	0.0938432	MAP3K8
ENSG00000204634	333.127	0.244719	0.111384	2.19707	0.0280156	0.139976	TBC1D8
ENSG00000185033	970.272	0.244703	0.0895561	2.73241	0.00628736	0.0598682	SEMA4B
ENSG00000162739	2058.89	0.244514	0.104812	2.33287	0.0196548	0.11393	SLAMF6
ENSG00000176533	719.37	0.244344	0.106521	2.29387	0.021798	0.121055	GNG7
ENSG00000158406	141.404	0.24434	0.0780068	3.13229	0.00173446	0.0288169	HIST1H4H
ENSG00000196422	122.315	0.243848	0.120912	2.01674	0.0437225	0.179412	PPP1R26
ENSG00000057704	361.914	0.243631	0.120807	2.0167	0.0437271	0.179412	TMCC3
ENSG00000106537	364.089	0.243243	0.120516	2.01835	0.0435553	0.179026	TSPAN13
ENSG00000137460	29.7304	0.242755	0.113581	2.13729	0.0325747	0.152939	FHDC1
ENSG00000115339	307.124	0.242486	0.082232	2.9488	0.00319007	0.0404615	GALNT3
ENSG00000211694	148.203	0.242254	0.109523	2.2119	0.0269735	0.136845	TRGV10
ENSG00000120278	1858.67	0.241645	0.0970261	2.49052	0.0127557	0.0891347	PLEKHG1
ENSG00000065923	1090.29	0.241549	0.0755949	3.19531	0.00139679	0.0257958	SLC9A7
ENSG00000135604	646.996	0.241485	0.118677	2.03481	0.0418701	0.175345	STX11
ENSG00000104427	49.4932	0.241205	0.12359	1.95166	0.0509791	0.195755	ZC2HC1A
ENSG00000267547	28.698	0.241045	0.119334	2.01992	0.0433919	0.178514
ENSG00000115392	276.621	0.240571	0.0813241	2.95817	0.00309472	0.0397775	FANCL
ENSG00000137101	530.36	0.240497	0.110439	2.17764	0.0294331	0.144005	CD72
ENSG00000116793	494.297	0.239819	0.0591017	4.05773	4.9553e-05	0.00412709	PHTF1
ENSG00000146476	823.063	0.239769	0.0743746	3.2238	0.00126501	0.0243045	ARMT1
ENSG00000136295	3268.53	0.239744	0.11903	2.01415	0.0439934	0.180143	TTYH3
ENSG00000230797	30.9407	0.23952	0.105704	2.26595	0.0234543	0.125933	YY2
ENSG00000146243	93.6331	0.239471	0.0799891	2.99379	0.00275533	0.0374002	IRAK1BP1
ENSG00000084234	4965.32	0.239358	0.105832	2.26168	0.0237175	0.126902	APLP2
ENSG00000238041	13.2889	0.238349	0.118045	2.01915	0.0434721	0.178764
ENSG00000102893	1981.08	0.238184	0.0442745	5.37971	7.46061e-08	0.000107459	PHKB
ENSG00000125885	561.54	0.238103	0.0739068	3.22167	0.00127446	0.0244202	MCM8
ENSG00000115902	1533.66	0.237802	0.101978	2.3319	0.0197061	0.114158	SLC1A4
ENSG00000015475	1448.23	0.237501	0.0980459	2.42235	0.0154206	0.0987582	BID
ENSG00000117450	3030.6	0.237227	0.0990832	2.39421	0.016656	0.103173	PRDX1
ENSG00000008283	279.507	0.237006	0.087606	2.70537	0.00682293	0.0627915	CYB561
ENSG00000001561	762.291	0.236924	0.0619307	3.82564	0.000130434	0.0065067	ENPP4
ENSG00000165028	68.2294	0.23667	0.108443	2.18243	0.0290779	0.143065	NIPSNAP3B
ENSG00000132718	801.811	0.236525	0.0837069	2.82564	0.00471869	0.0500589	SYT11
ENSG00000096968	1298.61	0.236179	0.0851049	2.77515	0.00551761	0.0551941	JAK2
ENSG00000177946	283.96	0.235865	0.0944024	2.4985	0.0124719	0.0881896	CENPBD1
ENSG00000115526	140.918	0.235742	0.0907067	2.59895	0.00935106	0.0750798	CHST10
ENSG00000151116	505.614	0.235504	0.0782295	3.01043	0.00260879	0.0363218	UEVLD
ENSG00000185880	1649.4	0.235504	0.0675316	3.48731	0.000487908	0.0138736	TRIM69
ENSG00000138172	479.22	0.235059	0.117814	1.99517	0.0460238	0.184184	CALHM2
ENSG00000005249	85.5743	0.234691	0.105104	2.23293	0.0255535	0.132344	PRKAR2B
ENSG00000134215	825.584	0.234649	0.0847583	2.76846	0.00563227	0.0557953	VAV3
ENSG00000103187	6090.79	0.234333	0.0896139	2.61492	0.0089248	0.0730088	COTL1
ENSG00000160211	2946.37	0.234149	0.10954	2.13756	0.0325528	0.152939	G6PD
ENSG00000136783	391.837	0.234066	0.0674044	3.47256	0.000515519	0.0143162	NIPSNAP3A
ENSG00000196678	68.997	0.23357	0.109226	2.13841	0.0324832	0.152756	ERI2
ENSG00000112210	51.7334	0.233561	0.0975976	2.3931	0.0167065	0.103265	RAB23
ENSG00000104341	197.563	0.233532	0.101153	2.30869	0.0209606	0.118744	LAPTM4B
ENSG00000196369	844.699	0.233189	0.0712908	3.27095	0.00107185	0.0217995	SRGAP2B
ENSG00000168734	406.543	0.233092	0.0871742	2.67387	0.00749822	0.0665439	PKIG
ENSG00000145016	3516.31	0.233041	0.0434553	5.36277	8.19568e-08	0.000107459	RUBCN
ENSG00000151914	144.349	0.232955	0.10024	2.32396	0.0201276	0.115663	DST
ENSG00000204301	34.1859	0.232764	0.109194	2.13165	0.0330357	0.154098	NOTCH4
ENSG00000104903	290.731	0.232491	0.101945	2.28054	0.0225756	0.123485	LYL1
ENSG00000135144	530.187	0.232482	0.0874921	2.65717	0.00787986	0.0684135	DTX1
ENSG00000174607	80.3592	0.23245	0.114873	2.02354	0.0430171	0.177847	UGT8
ENSG00000258056	77.1706	0.232192	0.0724848	3.20333	0.0013585	0.0254184
ENSG00000129467	71.3488	0.231948	0.100657	2.30434	0.0212036	0.119298	ADCY4
ENSG00000103966	1205.78	0.231875	0.0775244	2.99099	0.00278072	0.0375218	EHD4
ENSG00000082438	488.692	0.231852	0.0766418	3.02514	0.00248519	0.0352951	COBLL1
ENSG00000205302	2295.66	0.231845	0.067495	3.43499	0.000592566	0.0155459	SNX2
ENSG00000110092	89.0453	0.231773	0.114409	2.02583	0.0427824	0.177394	CCND1
ENSG00000113532	1060.83	0.231192	0.0727453	3.1781	0.00148244	0.0263996	ST8SIA4
ENSG00000122643	1083.84	0.231105	0.0838507	2.75615	0.00584868	0.0572306	NT5C3A
ENSG00000196218	71.0851	0.23075	0.116379	1.98275	0.0473956	0.187565	RYR1
ENSG00000198736	299.178	0.230669	0.0680645	3.38898	0.000701538	0.0169233	MSRB1
ENSG00000173621	91.6423	0.229442	0.110427	2.07776	0.0377311	0.165788	LRFN4
ENSG00000110324	6914.02	0.229263	0.0593294	3.86424	0.000111436	0.00610444	IL10RA
ENSG00000100889	735.05	0.229022	0.0880685	2.60049	0.00930897	0.0749214	PCK2
ENSG00000149294	257.056	0.228633	0.113505	2.01429	0.0439786	0.180122	NCAM1
ENSG00000231858	29.0476	0.228381	0.116475	1.96077	0.049906	0.19318
ENSG00000188848	279.459	0.228185	0.0850943	2.68156	0.00732801	0.0655259	BEND4
ENSG00000137767	1168.53	0.227891	0.115194	1.97832	0.0478922	0.188799	SQOR
ENSG00000135677	4117.18	0.227676	0.114715	1.9847	0.047178	0.187146	GNS
ENSG00000213719	5039.92	0.227548	0.0917685	2.47959	0.0131534	0.0908473	CLIC1
ENSG00000105738	1430.61	0.227351	0.0626914	3.62652	0.000287271	0.0103011	SIPA1L3
ENSG00000108448	138.706	0.226882	0.107396	2.11258	0.034637	0.157931	TRIM16L
ENSG00000198561	1591.26	0.226676	0.101033	2.24357	0.0248598	0.130448	CTNND1
ENSG00000113658	703.352	0.225943	0.0718889	3.14295	0.00167255	0.0281589	SMAD5
ENSG00000196296	36.1323	0.224961	0.100633	2.23546	0.0253869	0.132072	ATP2A1
ENSG00000197417	41.3137	0.224832	0.0844335	2.66283	0.00774859	0.0679099	SHPK
ENSG00000137752	1753.54	0.224613	0.115422	1.94602	0.0516519	0.197037	CASP1
ENSG00000143179	220.407	0.224028	0.0687837	3.257	0.00112596	0.0226044	UCK2
ENSG00000151689	264.965	0.223835	0.0858781	2.60642	0.0091493	0.0741009	INPP1
ENSG00000106665	739.098	0.223515	0.091645	2.43892	0.0147311	0.0965942	CLIP2
ENSG00000164430	512.245	0.22348	0.0803009	2.78303	0.00538535	0.0542543	CGAS
ENSG00000128203	186.995	0.222759	0.0647726	3.43909	0.000583672	0.0153737	ASPHD2
ENSG00000171604	1121.78	0.222514	0.0699286	3.18201	0.00146256	0.0263401	CXXC5
ENSG00000214087	487.811	0.221831	0.100194	2.21401	0.0268282	0.136484	ARL16
ENSG00000135842	3378.86	0.221804	0.110565	2.00611	0.0448448	0.182087	FAM129A
ENSG00000128487	148.773	0.221331	0.107226	2.06416	0.0390028	0.168636	SPECC1
ENSG00000133195	219.09	0.221322	0.0770146	2.87377	0.00405604	0.0458009	SLC39A11
ENSG00000085644	372.83	0.221149	0.0514121	4.3015	1.69645e-05	0.00227919	ZNF213
ENSG00000142731	89.6348	0.221074	0.0918235	2.40759	0.0160581	0.101083	PLK4
ENSG00000042317	31.1418	0.220708	0.105073	2.10053	0.0356821	0.160382	SPATA7
ENSG00000277496	158.341	0.220568	0.0765346	2.88194	0.00395236	0.0451285
ENSG00000265612	140.111	0.220495	0.109536	2.013	0.0441149	0.1804	MIR4539
ENSG00000198924	295.058	0.220092	0.0554232	3.97111	7.15373e-05	0.00490057	DCLRE1A
ENSG00000181004	108.875	0.219799	0.0665298	3.30377	0.000953932	0.0202049	BBS12
ENSG00000133789	3113.82	0.219679	0.0689276	3.1871	0.00143709	0.0261914	SWAP70
ENSG00000175893	613.849	0.219665	0.063421	3.4636	0.000533003	0.014532	ZDHHC21
ENSG00000156587	3134.41	0.219572	0.096429	2.27704	0.0227839	0.123968	UBE2L6
ENSG00000170677	204.587	0.219524	0.106842	2.05467	0.0399109	0.170846	SOCS6
ENSG00000177432	92.8823	0.219415	0.0728007	3.01391	0.00257905	0.0360231	NAP1L5
ENSG00000109944	52.1413	0.219322	0.106649	2.05648	0.0397361	0.170446	JHY
ENSG00000136213	1312.72	0.219309	0.110364	1.98714	0.0469067	0.186432	CHST12
ENSG00000119632	177.19	0.219206	0.0910102	2.40859	0.0160144	0.100909	IFI27L2
ENSG00000130363	179.73	0.219202	0.0852931	2.56999	0.0101702	0.0785838	RSPH3
ENSG00000138376	269.407	0.218682	0.0554731	3.94213	8.07627e-05	0.00514366	BARD1
ENSG00000103226	2607.19	0.218578	0.0500236	4.3695	1.24529e-05	0.00195887	NOMO3
ENSG00000211898	2914.69	0.218526	0.103784	2.10559	0.0352403	0.159448	IGHD
ENSG00000125841	59.3675	0.218514	0.0899716	2.42871	0.0151528	0.0980881	NRSN2
ENSG00000197142	2376.29	0.218401	0.0963489	2.26678	0.0234038	0.125846	ACSL5
ENSG00000125434	94.6399	0.217703	0.104184	2.08961	0.0366532	0.162956	SLC25A35
ENSG00000068001	101.769	0.217479	0.0831098	2.61677	0.00887662	0.0726793	HYAL2
ENSG00000241106	178.343	0.21742	0.112443	1.93361	0.0531614	0.199704	HLA-DOB
ENSG00000099953	48.4563	0.217307	0.109516	1.98425	0.0472285	0.187298	MMP11
ENSG00000176974	257.243	0.217268	0.0842038	2.58026	0.00987265	0.0774248	SHMT1
ENSG00000106367	356.907	0.216985	0.0634393	3.42035	0.000625406	0.0159996	AP1S1
ENSG00000132274	10791	0.216268	0.0876382	2.46773	0.0135972	0.0921523	TRIM22
ENSG00000129473	284.482	0.216122	0.0865811	2.49619	0.0125537	0.0884284	BCL2L2
ENSG00000145990	548.631	0.215973	0.0737547	2.92827	0.00340858	0.0416866	GFOD1
ENSG00000176393	825.221	0.21596	0.0798401	2.70491	0.00683227	0.062805	RNPEP
ENSG00000182986	52.3123	0.215836	0.10172	2.12187	0.0338489	0.15618	ZNF320
ENSG00000253438	32.8619	0.215357	0.104515	2.06053	0.0393477	0.169332	PCAT1
ENSG00000188171	147.819	0.215113	0.0984959	2.18398	0.0289635	0.142704	ZNF626
ENSG00000170266	804.318	0.215091	0.0797036	2.69864	0.00696243	0.0635982	GLB1
ENSG00000197548	786.945	0.21501	0.107132	2.00696	0.0447544	0.181959	ATG7
ENSG00000110090	2545.86	0.214799	0.0657865	3.26509	0.00109429	0.0221823	CPT1A
ENSG00000101868	364.88	0.214765	0.0562205	3.82005	0.000133423	0.00658186	POLA1
ENSG00000172936	2864.99	0.21422	0.066411	3.22567	0.00125679	0.02426	MYD88
ENSG00000196781	348.383	0.213983	0.0867124	2.46774	0.0135971	0.0921523	TLE1
ENSG00000196535	1505.68	0.213762	0.0601814	3.55196	0.000382377	0.0120235	MYO18A
ENSG00000239672	129.774	0.21365	0.0778846	2.74316	0.00608509	0.0585073	NME1
ENSG00000245317	17.8072	0.213565	0.108111	1.97543	0.0482191	0.189398
ENSG00000089876	297.259	0.213398	0.0709054	3.00961	0.00261579	0.0363872	DHX32
ENSG00000103490	126.478	0.212408	0.0941995	2.25487	0.0241414	0.128127	PYCARD
ENSG00000118495	435.947	0.212369	0.0682712	3.11066	0.0018667	0.0302185	PLAGL1
ENSG00000100077	1793.22	0.212021	0.0699522	3.03094	0.0024379	0.0348385	GRK3
ENSG00000198951	774.638	0.211934	0.0991012	2.13856	0.0324712	0.152738	NAGA
ENSG00000213988	51.4371	0.211915	0.105539	2.00793	0.044651	0.181725	ZNF90
ENSG00000102699	3541.19	0.210803	0.0664559	3.17208	0.00151351	0.0267327	PARP4
ENSG00000079950	2701.56	0.210731	0.060417	3.48795	0.000486747	0.0138736	STX7
ENSG00000131374	1489.65	0.21068	0.0562097	3.74811	0.000178173	0.00773049	TBC1D5
ENSG00000115841	73.7306	0.210406	0.0939797	2.23885	0.0251657	0.131502	RMDN2
ENSG00000102218	1176.92	0.210293	0.0903042	2.32872	0.0198739	0.114634	RP2
ENSG00000145012	1361.9	0.210058	0.0828334	2.53591	0.0112157	0.0831733	LPP
ENSG00000160685	1520.78	0.210026	0.0706511	2.97272	0.00295172	0.0387549	ZBTB7B
ENSG00000136367	51.4664	0.20984	0.0924315	2.27022	0.0231942	0.125084	ZFHX2
ENSG00000124334	191.744	0.209663	0.106837	1.96246	0.049709	0.192681	IL9R
ENSG00000160117	125.657	0.209619	0.0912729	2.29662	0.0216404	0.120592	ANKLE1
ENSG00000255274	38.0462	0.209303	0.0986833	2.12095	0.0339259	0.156188	SMIM35
ENSG00000175029	483.12	0.209164	0.0987721	2.11764	0.0342056	0.156962	CTBP2
ENSG00000101846	116.22	0.209131	0.0863439	2.42207	0.0154326	0.0988006	STS
ENSG00000189190	859.133	0.209038	0.0930616	2.24623	0.0246892	0.129985	ZNF600
ENSG00000140950	192.475	0.208862	0.0805267	2.5937	0.00949496	0.0757211	MEAK7
ENSG00000106683	1793.32	0.208755	0.0859902	2.42765	0.0151968	0.0981792	LIMK1
ENSG00000136492	55.3203	0.208441	0.106712	1.9533	0.0507839	0.195468	BRIP1
ENSG00000111666	376.906	0.208416	0.0790009	2.63814	0.00833616	0.0704802	CHPT1
ENSG00000102172	943.083	0.208308	0.0977455	2.13113	0.0330785	0.154137	SMS
ENSG00000233846	30.2781	0.207961	0.095399	2.17991	0.0292641	0.143581	SELENOTP1
ENSG00000139687	2312.64	0.207311	0.0556961	3.72218	0.00019751	0.00823938	RB1
ENSG00000006756	209.433	0.207188	0.104297	1.98653	0.0469749	0.186652	ARSD
ENSG00000028116	568.829	0.207132	0.0850246	2.43614	0.0148447	0.096994	VRK2
ENSG00000128567	44.3838	0.207116	0.101475	2.04106	0.0412447	0.173917	PODXL
ENSG00000187049	219.571	0.20699	0.0507513	4.07851	4.53248e-05	0.0040005	TMEM216
ENSG00000133739	139.868	0.206819	0.0831522	2.48723	0.0128741	0.0896901	LRRCC1
ENSG00000171310	3126.77	0.206088	0.0817067	2.52229	0.0116592	0.0851564	CHST11
ENSG00000196345	119.486	0.20581	0.0714827	2.87916	0.00398734	0.0453818	ZKSCAN7
ENSG00000103365	5941.95	0.205765	0.0581349	3.53944	0.000400978	0.0122806	GGA2
ENSG00000182606	1850.18	0.205642	0.057337	3.58655	0.000335081	0.0112341	TRAK1
ENSG00000261338	121.101	0.205589	0.0920253	2.23405	0.0254797	0.132223
ENSG00000274750	140.447	0.205566	0.0847917	2.42436	0.0153353	0.0984518	HIST1H3E
ENSG00000155366	377.766	0.205392	0.100419	2.04536	0.0408194	0.172917	RHOC
ENSG00000184992	297.565	0.205032	0.0779402	2.63064	0.00852247	0.0713659	BRI3BP
ENSG00000151748	634.081	0.205029	0.0959497	2.13684	0.0326108	0.153004	SAV1
ENSG00000182158	876.691	0.204723	0.061508	3.3284	0.000873452	0.0192536	CREB3L2
ENSG00000251615	103.228	0.204439	0.0969211	2.10933	0.0349161	0.158487
ENSG00000104738	498.938	0.204144	0.0558863	3.65285	0.000259342	0.00968246	MCM4
ENSG00000159423	71.885	0.203412	0.0710049	2.86476	0.00417319	0.0464625	ALDH4A1
ENSG00000237513	342.615	0.203115	0.101259	2.0059	0.0448673	0.182087
ENSG00000123473	88.0589	0.203113	0.0943815	2.15204	0.0313942	0.149622	STIL
ENSG00000129667	2685.22	0.203087	0.0808556	2.51172	0.0120144	0.086449	RHBDF2
ENSG00000163219	3340.52	0.203062	0.0573348	3.54168	0.000397589	0.0122801	ARHGAP25
ENSG00000282851	363.055	0.202905	0.102834	1.97314	0.0484801	0.1898	BISPR
ENSG00000159335	321.61	0.202399	0.104724	1.93269	0.0532746	0.199935	PTMS
ENSG00000151729	126.29	0.202086	0.0750234	2.69365	0.00706753	0.0642395	SLC25A4
ENSG00000006607	806.671	0.20151	0.0495852	4.06393	4.82543e-05	0.00411189	FARP2
ENSG00000178537	638.433	0.20134	0.0636706	3.16221	0.00156578	0.0273118	SLC25A20
ENSG00000168016	7068.87	0.201292	0.0729301	2.76006	0.00577899	0.0566994	TRANK1
ENSG00000119866	944.433	0.201226	0.0817375	2.46186	0.0138218	0.0929533	BCL11A
ENSG00000188677	375.315	0.201164	0.101626	1.97946	0.0477638	0.188495	PARVB
ENSG00000105339	1470.46	0.200919	0.0984607	2.0406	0.0412909	0.173993	DENND3
ENSG00000185480	45.3031	0.200895	0.103115	1.94826	0.0513837	0.196543	PARPBP
ENSG00000132825	317.466	0.200385	0.0510972	3.92165	8.79431e-05	0.00517875	PPP1R3D
ENSG00000086289	54.6772	0.200324	0.0944186	2.12165	0.0338667	0.15618	EPDR1
ENSG00000108639	3916.52	0.200313	0.0627693	3.19126	0.00141654	0.0259949	SYNGR2
ENSG00000008513	5976.85	0.200186	0.102988	1.94378	0.0519217	0.197592	ST3GAL1
ENSG00000171552	748.182	0.200028	0.0745018	2.68487	0.00725572	0.065114	BCL2L1
ENSG00000086065	1223.5	0.199861	0.0712017	2.80697	0.00500106	0.0518881	CHMP5
ENSG00000178685	3761.36	0.199663	0.0810241	2.46424	0.0137303	0.092786	PARP10
ENSG00000180921	93.2449	0.199629	0.10149	1.96699	0.0491845	0.191272	FAM83H
ENSG00000180938	63.4806	0.199481	0.0821294	2.42886	0.0151462	0.0980881	ZNF572
ENSG00000159842	3410.65	0.199051	0.0865487	2.29988	0.0214551	0.119995	ABR
ENSG00000144118	1305.6	0.199016	0.0918881	2.16585	0.0303227	0.146565	RALB
ENSG00000197497	76.6535	0.198013	0.098583	2.0086	0.04458	0.181535	ZNF665
ENSG00000178694	406.374	0.197992	0.0523331	3.78331	0.000154758	0.00722963	NSUN3
ENSG00000124813	338.829	0.197431	0.099774	1.97878	0.0478404	0.188716	RUNX2
ENSG00000084112	2701.28	0.197418	0.0833732	2.36788	0.0178903	0.107367	SSH1
ENSG00000135956	2756.66	0.197405	0.0821813	2.40206	0.016303	0.101766	TMEM127
ENSG00000261270	31.4419	0.196626	0.0995074	1.976	0.0481552	0.189228
ENSG00000163536	67.0993	0.196311	0.0930905	2.10882	0.03496	0.158647	SERPINI1
ENSG00000285665	41.0038	0.196212	0.0879268	2.23153	0.0256459	0.132707
ENSG00000130402	4206.09	0.196094	0.0576719	3.40016	0.000673466	0.0165753	ACTN4
ENSG00000167461	665.302	0.196079	0.0438496	4.47163	7.76272e-06	0.00149004	RAB8A
ENSG00000021355	1823.2	0.195531	0.0862418	2.26724	0.0233755	0.125767	SERPINB1
ENSG00000068097	770.811	0.19541	0.0751036	2.60187	0.00927172	0.0747178	HEATR6
ENSG00000196659	68.0521	0.194921	0.0956151	2.0386	0.0414896	0.174471	TTC30B
ENSG00000088992	43.3555	0.194799	0.0982105	1.98348	0.0473136	0.187401	TESC
ENSG00000148057	152.997	0.194103	0.0556176	3.48995	0.000483108	0.0138506	IDNK
ENSG00000159259	68.9603	0.193866	0.0664712	2.91655	0.00353929	0.0429222	CHAF1B
ENSG00000268001	452.495	0.193773	0.0921003	2.10393	0.0353846	0.159709	CARD8-AS1
ENSG00000158470	1662.99	0.193188	0.0927718	2.0824	0.037306	0.164389	B4GALT5
ENSG00000104081	2005.53	0.193129	0.0791113	2.44124	0.0146371	0.096321	BMF
ENSG00000079337	38.9526	0.193081	0.085093	2.26906	0.0232649	0.125355	RAPGEF3
ENSG00000111679	4359.02	0.193006	0.0793687	2.43176	0.0150256	0.0975868	PTPN6
ENSG00000115325	596.685	0.192867	0.0670272	2.87744	0.00400913	0.0455506	DOK1
ENSG00000244509	2146.01	0.192816	0.0821481	2.34717	0.0189165	0.111097	APOBEC3C
ENSG00000164144	614.482	0.192711	0.0532042	3.62211	0.000292214	0.0104155	ARFIP1
ENSG00000129465	487.219	0.192351	0.0540839	3.55653	0.00037579	0.0118861	RIPK3
ENSG00000128829	1229.86	0.192131	0.0454744	4.22505	2.3889e-05	0.0028186	EIF2AK4
ENSG00000186496	43.1117	0.192131	0.0906459	2.11958	0.0340416	0.156486	ZNF396
ENSG00000107779	118.506	0.19211	0.0961468	1.99809	0.0457067	0.183765	BMPR1A
ENSG00000124588	696.033	0.191595	0.0867018	2.20982	0.0271177	0.137301	NQO2
ENSG00000104325	904.67	0.191441	0.0470215	4.07135	4.67418e-05	0.00405816	DECR1
ENSG00000167107	230.704	0.191335	0.0735841	2.60022	0.00931642	0.0749467	ACSF2
ENSG00000114573	2516.42	0.191331	0.0820128	2.33294	0.0196511	0.11393	ATP6V1A
ENSG00000122122	3730.42	0.191305	0.0807682	2.36857	0.0178572	0.107269	SASH3
ENSG00000139921	1387.83	0.191099	0.0534515	3.57518	0.000349987	0.0114828	TMX1
ENSG00000189319	2188.03	0.190888	0.074229	2.57161	0.0101227	0.0785838	FAM53B
ENSG00000178966	321.691	0.190685	0.0682553	2.7937	0.00521091	0.0532844	RMI1
ENSG00000108175	3882.95	0.190547	0.0983314	1.93781	0.0526469	0.198569	ZMIZ1
ENSG00000241170	74.258	0.190483	0.0773403	2.46292	0.0137812	0.0929485
ENSG00000159228	259.324	0.190271	0.0861039	2.20978	0.0271204	0.137301	CBR1
ENSG00000114745	576.846	0.190241	0.0643179	2.95783	0.00309814	0.0397937	GORASP1
ENSG00000154978	3041.1	0.190162	0.0603085	3.15316	0.00161514	0.0276525	VOPP1
ENSG00000225791	36.0968	0.1901	0.0931197	2.04146	0.0412056	0.173912	TRAM2-AS1
ENSG00000164296	78.6348	0.189676	0.0824187	2.30137	0.0213704	0.119835	TIGD6
ENSG00000162341	804.692	0.189474	0.0804697	2.3546	0.0185428	0.109713	TPCN2
ENSG00000106327	77.5459	0.188621	0.0881044	2.14088	0.0322839	0.152207	TFR2
ENSG00000196081	26.2942	0.188464	0.0954882	1.97369	0.0484173	0.189707	ZNF724
ENSG00000164253	541.986	0.18797	0.0484977	3.87586	0.00010625	0.00590827	WDR41
ENSG00000101265	3225.13	0.187852	0.0632493	2.97003	0.00297775	0.0389135	RASSF2
ENSG00000008853	220.332	0.187809	0.0682931	2.75005	0.0059586	0.057784	RHOBTB2
ENSG00000213699	512.381	0.18773	0.0887252	2.11586	0.0343564	0.157344	SLC35F6
ENSG00000248593	80.0722	0.187634	0.0852848	2.20009	0.0278004	0.139426	DSTNP2
ENSG00000142961	1122.48	0.187552	0.0708679	2.6465	0.00813296	0.0695441	MOB3C
ENSG00000148429	613.53	0.187239	0.063642	2.94207	0.00326024	0.0409053	USP6NL
ENSG00000132256	721.65	0.187176	0.0569528	3.28652	0.00101434	0.0211199	TRIM5
ENSG00000172869	2273.38	0.187087	0.0476112	3.92946	8.51358e-05	0.00517875	DMXL1
ENSG00000117676	4038.01	0.186842	0.0912091	2.0485	0.040511	0.172483	RPS6KA1
ENSG00000146859	951.835	0.186589	0.0680191	2.74318	0.00608469	0.0585073	TMEM140
ENSG00000121060	2808.56	0.186582	0.0696174	2.6801	0.00736005	0.065666	TRIM25
ENSG00000100280	2427.98	0.185508	0.0541588	3.42526	0.000614203	0.0158334	AP1B1
ENSG00000162704	6510.47	0.185336	0.070011	2.64725	0.00811501	0.069472	ARPC5
ENSG00000170903	490.559	0.185256	0.03632	5.10065	3.38488e-07	0.000270878	MSANTD4
ENSG00000142252	151.599	0.185175	0.054478	3.39907	0.000676148	0.0165936	GEMIN7
ENSG00000109854	920.746	0.184953	0.0559511	3.30562	0.000947659	0.0201649	HTATIP2
ENSG00000223547	571.588	0.184753	0.0759658	2.43205	0.0150136	0.0975486	ZNF844
ENSG00000076770	1369.32	0.184612	0.0607189	3.04044	0.00236236	0.03438	MBNL3
ENSG00000143801	197.273	0.184528	0.0726534	2.53984	0.0110904	0.0826693	PSEN2
ENSG00000140563	749.715	0.184159	0.0766527	2.40251	0.0162832	0.101711	MCTP2
ENSG00000170581	7845.72	0.183764	0.0737916	2.49031	0.0127632	0.0891536	STAT2
ENSG00000102781	309.344	0.183757	0.0675817	2.71904	0.00654717	0.061134	KATNAL1
ENSG00000185201	1503.97	0.183504	0.0666441	2.75349	0.00589629	0.0574019	IFITM2
ENSG00000057252	2148.95	0.183483	0.0756324	2.42599	0.0152668	0.0983567	SOAT1
ENSG00000144791	1345.55	0.183143	0.0546598	3.35059	0.000806384	0.018392	LIMD1
ENSG00000198964	1040.33	0.183071	0.083418	2.19462	0.0281907	0.140576	SGMS1
ENSG00000163686	283.874	0.182596	0.0773436	2.36084	0.0182337	0.108788	ABHD6
ENSG00000197948	1145.63	0.18221	0.0490515	3.71466	0.000203477	0.0083973	FCHSD1
ENSG00000203705	314.703	0.181971	0.0495099	3.67546	0.000237424	0.00916149	TATDN3
ENSG00000181938	69.3517	0.181925	0.0768982	2.3658	0.0179913	0.107761	GINS3
ENSG00000118242	558	0.181825	0.0851726	2.13478	0.0327788	0.153632	MREG
ENSG00000245571	153.149	0.18182	0.081387	2.23402	0.0254816	0.132223	FAM111A-DT
ENSG00000151470	157.336	0.181734	0.0796462	2.28177	0.0225032	0.123308	C4orf33
ENSG00000104447	501.784	0.181422	0.0836491	2.16885	0.0300943	0.145882	TRPS1
ENSG00000108384	223.989	0.181149	0.0481704	3.76059	0.000169511	0.00759129	RAD51C
ENSG00000139182	1227.52	0.181046	0.0808866	2.23827	0.0252035	0.131527	CLSTN3
ENSG00000175567	3847.81	0.180884	0.0789094	2.2923	0.0218885	0.121313	UCP2
ENSG00000196247	1401.66	0.180569	0.0652155	2.76881	0.00562623	0.0557953	ZNF107
ENSG00000254986	637.881	0.180552	0.0442747	4.078	4.54256e-05	0.0040005	DPP3
ENSG00000214717	1170.69	0.18052	0.0733134	2.46231	0.0138045	0.092951	ZBED1
ENSG00000126067	1484.65	0.180449	0.0471118	3.83022	0.000128026	0.00642206	PSMB2
ENSG00000122729	514.715	0.180155	0.0620901	2.90151	0.00371367	0.0439857	ACO1
ENSG00000166189	643.145	0.180088	0.0589637	3.05421	0.00225651	0.0334407	HPS6
ENSG00000166224	1921.55	0.179637	0.0899234	1.99766	0.0457533	0.183819	SGPL1
ENSG00000102870	257.255	0.179529	0.0659832	2.72083	0.0065118	0.061134	ZNF629
ENSG00000180423	111.818	0.179507	0.0608897	2.94806	0.00319772	0.0404795	HARBI1
ENSG00000160710	13827.6	0.179473	0.0501765	3.57684	0.00034778	0.0114575	ADAR
ENSG00000117153	1131.27	0.179182	0.0592995	3.02164	0.00251412	0.0355495	KLHL12
ENSG00000162929	139.603	0.179156	0.0654951	2.73541	0.00623028	0.0594474	KIAA1841
ENSG00000097021	167.624	0.178969	0.0922894	1.93922	0.0524747	0.198245	ACOT7
ENSG00000162924	2520.92	0.178204	0.0784201	2.27243	0.0230606	0.124583	REL
ENSG00000107789	359.916	0.178074	0.0799132	2.22834	0.0258576	0.13339	MINPP1
ENSG00000164885	153.26	0.178048	0.0731692	2.43337	0.0149591	0.0974116	CDK5
ENSG00000170873	2209.23	0.177987	0.0802472	2.21799	0.0265558	0.135582	MTSS1
ENSG00000168792	520.377	0.176519	0.0839325	2.10311	0.0354565	0.15981	ABHD15
ENSG00000149218	444.897	0.176432	0.0564075	3.12781	0.00176113	0.0290721	ENDOD1
ENSG00000213985	91.5269	0.176386	0.0830137	2.12478	0.033605	0.155684
ENSG00000204267	2864.24	0.176091	0.067482	2.60944	0.00906892	0.073664	TAP2
ENSG00000091317	3962.28	0.175713	0.0644366	2.72691	0.006393	0.0605607	CMTM6
ENSG00000184009	26770.2	0.175604	0.0695299	2.52558	0.0115507	0.0846007	ACTG1
ENSG00000214013	435.87	0.175407	0.0392685	4.46686	7.93747e-06	0.00150616	GANC
ENSG00000100490	39.3897	0.175153	0.0845782	2.0709	0.0383684	0.167075	CDKL1
ENSG00000103274	243.57	0.175001	0.0488163	3.5849	0.000337212	0.0112645	NUBP1
ENSG00000158373	198.441	0.174932	0.0749742	2.33323	0.0196359	0.11393	HIST1H2BD
ENSG00000140464	1757.06	0.174876	0.0645673	2.70843	0.00676015	0.0625892	PML
ENSG00000135148	2296.47	0.174625	0.0719978	2.42543	0.0152904	0.0983695	TRAFD1
ENSG00000054277	131.046	0.174415	0.0692075	2.52018	0.0117296	0.0853677	OPN3
ENSG00000158691	310.319	0.174108	0.0484229	3.59557	0.000323683	0.0109718	ZSCAN12
ENSG00000117016	169.393	0.174082	0.0790945	2.20094	0.0277405	0.139278	RIMS3
ENSG00000048392	1079.19	0.17398	0.0546872	3.18136	0.00146584	0.0263401	RRM2B
ENSG00000130347	74.0545	0.173758	0.0778444	2.23212	0.025607	0.132576	RTN4IP1
ENSG00000137106	1037.42	0.173666	0.0572691	3.03246	0.00242566	0.0347716	GRHPR
ENSG00000175283	171.018	0.173307	0.0636238	2.72394	0.00645081	0.0608578	DOLK
ENSG00000012232	842.931	0.173254	0.0573478	3.0211	0.00251856	0.0355495	EXTL3
ENSG00000157350	1765.09	0.173235	0.0850736	2.03629	0.0417212	0.174879	ST3GAL2
ENSG00000163535	191.54	0.17323	0.0670591	2.58325	0.00978754	0.076989	SGO2
ENSG00000132740	769.168	0.173091	0.0598439	2.89238	0.00382338	0.0444836	IGHMBP2
ENSG00000197879	871.451	0.172934	0.0806462	2.14436	0.0320043	0.151393	MYO1C
ENSG00000197442	1236.58	0.172832	0.085246	2.02745	0.0426163	0.176945	MAP3K5
ENSG00000050405	227.676	0.172778	0.0759287	2.27553	0.0228743	0.124175	LIMA1
ENSG00000141642	76.4437	0.172775	0.0666527	2.59217	0.00953739	0.0759366	ELAC1
ENSG00000165934	1897.11	0.172702	0.0390123	4.42685	9.56196e-06	0.00166035	CPSF2
ENSG00000139291	576.347	0.172702	0.0635321	2.71834	0.00656108	0.061208	TMEM19
ENSG00000092036	127.654	0.172613	0.0649501	2.65762	0.00786938	0.068387	HAUS4
ENSG00000180573	1094.49	0.172441	0.0695308	2.48007	0.0131356	0.0908473	HIST1H2AC
ENSG00000165338	178.653	0.17244	0.07973	2.16279	0.030557	0.147259	HECTD2
ENSG00000122783	537.573	0.172266	0.0558967	3.08186	0.00205713	0.0317913	CYREN
ENSG00000177885	5932.07	0.172231	0.0641411	2.68519	0.00724877	0.0650998	GRB2
ENSG00000175048	389.644	0.172078	0.0889931	1.93361	0.0531615	0.199704	ZDHHC14
ENSG00000168394	7677.43	0.172073	0.0779322	2.20799	0.0272449	0.137729	TAP1
ENSG00000177842	96.6247	0.171971	0.0574625	2.99275	0.00276473	0.0374724	ZNF620
ENSG00000174238	2894.84	0.171717	0.0809354	2.12166	0.0338666	0.15618	PITPNA
ENSG00000160991	3826.78	0.171661	0.0518015	3.31382	0.000920322	0.0198189	ORAI2
ENSG00000059378	3816.55	0.170986	0.0794275	2.15272	0.0313404	0.149453	PARP12
ENSG00000141349	263.174	0.170747	0.0642002	2.65961	0.00782317	0.0682406	G6PC3
ENSG00000131849	125.665	0.170523	0.074303	2.29497	0.0217346	0.120893	ZNF132
ENSG00000121578	347.322	0.169653	0.0563482	3.01079	0.00260569	0.036306	B4GALT4
ENSG00000157600	1124.15	0.169557	0.0701317	2.41769	0.0156192	0.0994764	TMEM164
ENSG00000099203	98.6162	0.169295	0.0656206	2.5799	0.00988279	0.0774383	TMED1
ENSG00000168297	1336.86	0.169278	0.0488481	3.46539	0.00052946	0.0144803	PXK
ENSG00000161405	6898.3	0.169184	0.0653788	2.58775	0.00966063	0.0765119	IKZF3
ENSG00000084090	3639.29	0.168968	0.0385628	4.38163	1.17794e-05	0.00188532	STARD7
ENSG00000114978	7871.4	0.168679	0.0402331	4.19254	2.75844e-05	0.00309584	MOB1A
ENSG00000123178	105.165	0.168489	0.0674415	2.4983	0.0124791	0.0882068	SPRYD7
ENSG00000160877	1238.65	0.168301	0.052286	3.21886	0.00128702	0.0245735	NACC1
ENSG00000125454	413.435	0.168144	0.0688229	2.44314	0.01456	0.0959508	SLC25A19
ENSG00000136167	29456.6	0.167986	0.0732158	2.29439	0.0217682	0.120937	LCP1
ENSG00000051108	3267.22	0.16778	0.046368	3.61845	0.000296376	0.0104514	HERPUD1
ENSG00000198513	36.4072	0.167681	0.0864109	1.9405	0.0523187	0.198149	ATL1
ENSG00000008130	2877.22	0.167562	0.0571509	2.93193	0.00336864	0.0415015	NADK
ENSG00000198585	397.738	0.166792	0.0737434	2.26179	0.0237105	0.126902	NUDT16
ENSG00000165533	55.5859	0.166681	0.0836517	1.99256	0.0463092	0.184936	TTC8
ENSG00000163959	90.3506	0.166546	0.0734437	2.26767	0.0233494	0.12571	SLC51A
ENSG00000115145	1023.53	0.166477	0.0566074	2.94092	0.00327243	0.0409744	STAM2
ENSG00000169410	907.363	0.166256	0.060916	2.72926	0.00634761	0.0602549	PTPN9
ENSG00000065615	1337.29	0.165751	0.0702824	2.35835	0.0183563	0.109094	CYB5R4
ENSG00000064115	684.655	0.165676	0.0543402	3.04887	0.00229702	0.0337691	TM7SF3
ENSG00000235106	338.825	0.165382	0.0705535	2.34407	0.0190748	0.111706	BRD3OS
ENSG00000047230	183.883	0.165346	0.0632911	2.61247	0.00898911	0.0734044	CTPS2
ENSG00000125871	439.609	0.165149	0.0541336	3.05076	0.00228264	0.033674	MGME1
ENSG00000088298	972.9	0.16485	0.067878	2.42863	0.0151561	0.0980881	EDEM2
ENSG00000152784	496.695	0.164843	0.0711	2.31847	0.0204237	0.116745	PRDM8
ENSG00000188002	228.712	0.164471	0.0689941	2.38384	0.0171329	0.104976
ENSG00000177556	497.519	0.164345	0.0814423	2.01793	0.0435986	0.179124	ATOX1
ENSG00000142686	317.517	0.164219	0.0651763	2.51962	0.0117483	0.0854506	C1orf216
ENSG00000152422	158.031	0.164105	0.0807917	2.03121	0.0422335	0.17603	XRCC4
ENSG00000075624	65826.3	0.1641	0.0747382	2.19567	0.0281156	0.140319	ACTB
ENSG00000120509	210.169	0.164009	0.0558972	2.93412	0.00334491	0.0413197	PDZD11
ENSG00000023909	769.976	0.164001	0.0730164	2.24608	0.0246986	0.129998	GCLM
ENSG00000163644	2732.77	0.163749	0.0534622	3.0629	0.00219205	0.0329094	PPM1K
ENSG00000100297	1631.53	0.163527	0.0528713	3.09293	0.00198188	0.0312851	MCM5
ENSG00000204947	53.6276	0.163492	0.0804431	2.0324	0.0421133	0.175768	ZNF425
ENSG00000165389	283.354	0.16348	0.0581264	2.81249	0.00491595	0.0513044	SPTSSA
ENSG00000161217	1647.07	0.16332	0.0583487	2.79903	0.00512564	0.0526759	PCYT1A
ENSG00000173821	30818.8	0.16328	0.0713452	2.2886	0.0221027	0.122132	RNF213
ENSG00000169499	3734.87	0.163176	0.0493898	3.30385	0.000953681	0.0202049	PLEKHA2
ENSG00000169519	284.377	0.162876	0.059423	2.74096	0.00612605	0.0586355	METTL15
ENSG00000240065	2467.35	0.162768	0.0791777	2.05573	0.0398086	0.170638	PSMB9
ENSG00000103489	1516.15	0.162423	0.0553501	2.93446	0.00334129	0.0413028	XYLT1
ENSG00000069943	291.944	0.162279	0.0422554	3.84042	0.000122825	0.00633252	PIGB
ENSG00000171067	340.486	0.16198	0.0470138	3.44538	0.000570258	0.0151898	C11orf24
ENSG00000116191	1946.8	0.161854	0.0794041	2.03835	0.0415146	0.174536	RALGPS2
ENSG00000178996	978.326	0.161589	0.072061	2.24239	0.0249363	0.130689	SNX18
ENSG00000118655	285.73	0.161404	0.0747635	2.15886	0.0308611	0.148157	DCLRE1B
ENSG00000128309	290.156	0.161318	0.0829797	1.94406	0.0518884	0.197592	MPST
ENSG00000134996	1650.4	0.161238	0.0614205	2.62515	0.00866114	0.0718897	OSTF1
ENSG00000119333	331.227	0.161189	0.0793014	2.03261	0.0420923	0.17572	WDR34
ENSG00000170464	181.055	0.161132	0.0581151	2.77264	0.00556044	0.0554117	DNAJC18
ENSG00000181830	455.444	0.160931	0.0520805	3.09004	0.00200132	0.0314302	SLC35C1
ENSG00000139405	242.537	0.16087	0.0583639	2.75633	0.00584547	0.0572297	RITA1
ENSG00000182628	348.16	0.160738	0.063341	2.53767	0.0111594	0.0829565	SKA2
ENSG00000096092	90.6009	0.1607	0.0791735	2.02972	0.0423849	0.176501	TMEM14A
ENSG00000079277	1506.1	0.160647	0.0824577	1.94823	0.0513875	0.196543	MKNK1
ENSG00000196712	1811.56	0.160346	0.0500089	3.20635	0.00134431	0.0252999	NF1
ENSG00000146143	212.627	0.160036	0.0542802	2.94834	0.00319489	0.0404715	PRIM2
ENSG00000264522	230.018	0.15988	0.0742707	2.15266	0.0313453	0.149453	OTUD7B
ENSG00000177200	1727.15	0.159298	0.0415855	3.83061	0.000127828	0.00642206	CHD9
ENSG00000153814	666.368	0.159181	0.0609443	2.61191	0.00900378	0.0734591	JAZF1
ENSG00000102897	340.33	0.158974	0.0434463	3.6591	0.000253106	0.00952166	LYRM1
ENSG00000072858	1168.31	0.158832	0.0696608	2.28007	0.0226033	0.123563	SIDT1
ENSG00000160446	345.195	0.158626	0.0603497	2.62844	0.00857771	0.0716015	ZDHHC12
ENSG00000067066	5090.18	0.15841	0.0478237	3.31238	0.000925045	0.0198443	SP100
ENSG00000196371	295.502	0.158316	0.0789035	2.00646	0.0448074	0.182058	FUT4
ENSG00000119969	211.389	0.158316	0.0594985	2.66084	0.00779462	0.0680587	HELLS
ENSG00000073969	1837.71	0.157823	0.0518807	3.04204	0.00234979	0.0342712	NSF
ENSG00000073803	274.334	0.157689	0.0599986	2.62822	0.00858337	0.0716163	MAP3K13
ENSG00000144711	3503.57	0.157652	0.0553753	2.84698	0.00441363	0.0479398	IQSEC1
ENSG00000149084	257.641	0.157574	0.0716253	2.19998	0.0278086	0.139429	HSD17B12
ENSG00000099968	1085.05	0.157456	0.0354016	4.44772	8.67854e-06	0.00157341	BCL2L13
ENSG00000049239	1644.13	0.157456	0.0624951	2.5195	0.0117523	0.0854506	H6PD
ENSG00000117266	160.494	0.157409	0.071106	2.21372	0.0268484	0.136488	CDK18
ENSG00000112343	3113.17	0.157236	0.0401596	3.91529	9.02967e-05	0.0052762	TRIM38
ENSG00000116237	890.064	0.157179	0.0470225	3.34264	0.000829869	0.0186731	ICMT
ENSG00000111726	696.583	0.157163	0.0681204	2.30714	0.0210472	0.118942	CMAS
ENSG00000113583	1229.73	0.15713	0.0493274	3.18545	0.0014453	0.0262293	C5orf15
ENSG00000085449	2784.41	0.156888	0.0692233	2.26641	0.0234265	0.125894	WDFY1
ENSG00000072135	1612.12	0.156876	0.0701089	2.2376	0.025247	0.131642	PTPN18
ENSG00000136816	927.363	0.156789	0.0604764	2.59256	0.00952652	0.075907	TOR1B
ENSG00000174442	239.516	0.156775	0.0474488	3.3041	0.000952819	0.0202049	ZWILCH
ENSG00000112367	617.173	0.156732	0.0483112	3.24422	0.00117771	0.0233587	FIG4
ENSG00000198331	117.59	0.156544	0.0665986	2.35057	0.0187449	0.110372	HYLS1
ENSG00000164597	902.883	0.155665	0.0461211	3.37513	0.000737797	0.0174	COG5
ENSG00000171649	317.831	0.155633	0.0745114	2.08872	0.036733	0.163075	ZIK1
ENSG00000005469	279.311	0.155559	0.0689016	2.2577	0.0239647	0.127631	CROT
ENSG00000172171	166.676	0.155511	0.0456307	3.40804	0.000654314	0.0164302	TEFM
ENSG00000023697	394.082	0.155229	0.050113	3.09758	0.00195105	0.0311077	DERA
ENSG00000010270	740.17	0.155221	0.0631316	2.45868	0.0139447	0.0935716	STARD3NL
ENSG00000173692	2277.38	0.155048	0.0489862	3.16513	0.00155014	0.0271991	PSMD1
ENSG00000134287	1943.62	0.15469	0.0433552	3.56796	0.000359776	0.0116304	ARF3
ENSG00000139370	1039.45	0.154648	0.0614435	2.51691	0.0118389	0.0857242	SLC15A4
ENSG00000135972	344.641	0.154617	0.0520096	2.97285	0.00295051	0.0387549	MRPS9
ENSG00000175040	1373.33	0.154433	0.0784644	1.96819	0.049046	0.190894	CHST2
ENSG00000129636	577.89	0.154171	0.0487909	3.15983	0.0015786	0.0273816	ITFG1
ENSG00000158887	70.7344	0.154004	0.0755392	2.03872	0.0414777	0.17446	MPZ
ENSG00000138600	2679.67	0.153865	0.0668049	2.30319	0.0212679	0.119529	SPPL2A
ENSG00000014216	2577.88	0.153624	0.0523003	2.93734	0.00331039	0.0411472	CAPN1
ENSG00000184307	399.469	0.153418	0.0713927	2.14893	0.0316396	0.150349	ZDHHC23
ENSG00000107864	150.124	0.153067	0.0597954	2.55985	0.0104719	0.0799109	CPEB3
ENSG00000231167	40.2916	0.152818	0.0720079	2.12224	0.0338178	0.156081	YBX1P2
ENSG00000144909	1285.86	0.152557	0.0727057	2.09828	0.0358808	0.160843	OSBPL11
ENSG00000169957	357.185	0.152344	0.0603392	2.52479	0.0115768	0.0847391	ZNF768
ENSG00000143870	2060.4	0.15234	0.0682237	2.23294	0.0255526	0.132344	PDIA6
ENSG00000104356	295.029	0.152243	0.0528091	2.8829	0.00394034	0.0450245	POP1
ENSG00000181450	287.016	0.152216	0.0542787	2.80434	0.00504204	0.0521662	ZNF678
ENSG00000119471	511.285	0.151949	0.0498096	3.05061	0.00228378	0.033674	HSDL2
ENSG00000169093	811.827	0.151337	0.0412586	3.66801	0.000244445	0.00929599	ASMTL
ENSG00000176024	214.28	0.151312	0.0460305	3.28722	0.00101184	0.0210916	ZNF613
ENSG00000119912	962.164	0.151191	0.0444223	3.4035	0.000665293	0.0165371	IDE
ENSG00000269973	82.8146	0.150419	0.0719319	2.09112	0.0365169	0.162665
ENSG00000138175	251.588	0.150392	0.04952	3.037	0.00238945	0.0345484	ARL3
ENSG00000134308	4292.39	0.150191	0.0416101	3.60948	0.000306812	0.010615	YWHAQ
ENSG00000011638	231.131	0.150171	0.0593073	2.53209	0.0113386	0.0835794	TMEM159
ENSG00000153214	990.261	0.150151	0.0454745	3.30188	0.000960399	0.0202719	TMEM87B
ENSG00000166275	457.214	0.150117	0.0566034	2.65209	0.00799947	0.0690611	BORCS7
ENSG00000115084	899.933	0.149963	0.0534734	2.80445	0.00504031	0.0521662	SLC35F5
ENSG00000176473	95.6891	0.149858	0.0585027	2.56155	0.0104205	0.0796513	WDR25
ENSG00000136824	621.012	0.149653	0.0502357	2.97901	0.00289178	0.0382921	SMC2
ENSG00000176087	1558.74	0.149536	0.0379259	3.94285	8.05205e-05	0.00514366	SLC35A4
ENSG00000137478	1403.28	0.149497	0.0362851	4.12006	3.7878e-05	0.00366646	FCHSD2
ENSG00000082269	367.345	0.149491	0.0496779	3.0092	0.00261938	0.0363872	FAM135A
ENSG00000109756	1517.17	0.149416	0.0700653	2.13253	0.0329634	0.153965	RAPGEF2
ENSG00000143799	4350.06	0.149319	0.0439265	3.39929	0.000675621	0.0165936	PARP1
ENSG00000133119	165.786	0.149311	0.0574706	2.59804	0.00937566	0.0750798	RFC3
ENSG00000159792	516.541	0.149173	0.0498594	2.99186	0.0027728	0.0374991	PSKH1
ENSG00000139579	339.385	0.149129	0.0508176	2.9346	0.00333978	0.0413028	NABP2
ENSG00000169490	648.988	0.148828	0.0566721	2.62612	0.00863646	0.0717751	TM2D2
ENSG00000182179	2793.68	0.148442	0.0716432	2.07197	0.0382686	0.166947	UBA7
ENSG00000182185	97.466	0.148382	0.067474	2.1991	0.0278707	0.139651	RAD51B
ENSG00000115750	343.906	0.147885	0.0539905	2.7391	0.00616077	0.0589372	TAF1B
ENSG00000233954	107.626	0.147697	0.0571588	2.58398	0.00976685	0.0769228	UQCRHL
ENSG00000151065	356.76	0.147384	0.0591709	2.49082	0.012745	0.0891279	DCP1B
ENSG00000119979	530.265	0.147306	0.0677764	2.17341	0.0297493	0.144893	FAM45A
ENSG00000196663	479.014	0.147175	0.0530418	2.7747	0.0055252	0.0551955	TECPR2
ENSG00000124120	799.631	0.146876	0.0374483	3.92211	8.7777e-05	0.00517875	TTPAL
ENSG00000145730	454.466	0.146718	0.0688784	2.1301	0.0331633	0.154337	PAM
ENSG00000185515	564.967	0.146673	0.0397255	3.69216	0.000222357	0.00885866	BRCC3
ENSG00000197555	2095.54	0.146601	0.0680982	2.15279	0.0313349	0.149453	SIPA1L1
ENSG00000079999	1313.86	0.146328	0.0613128	2.38657	0.0170061	0.1045	KEAP1
ENSG00000069974	1934.57	0.146082	0.0713715	2.04678	0.0406795	0.172748	RAB27A
ENSG00000198833	2859.17	0.146076	0.068825	2.12243	0.0338015	0.156049	UBE2J1
ENSG00000188827	498.246	0.146051	0.0568254	2.57017	0.0101648	0.0785838	SLX4
ENSG00000168496	297.987	0.146011	0.0467773	3.1214	0.00179992	0.0296253	FEN1
ENSG00000106305	171.277	0.145959	0.0551533	2.64642	0.00813476	0.0695441	AIMP2
ENSG00000152127	2483.37	0.145862	0.060031	2.42978	0.0151079	0.0979829	MGAT5
ENSG00000138459	607.526	0.145279	0.048917	2.96991	0.00297887	0.0389135	SLC35A5
ENSG00000120925	449.113	0.145041	0.048758	2.97471	0.00293267	0.0386944	RNF170
ENSG00000100865	386.609	0.144781	0.0404823	3.57639	0.000348371	0.0114575	CINP
ENSG00000116641	358.643	0.144274	0.0662003	2.17935	0.0293056	0.14361	DOCK7
ENSG00000138780	140.037	0.144093	0.0621449	2.31866	0.0204136	0.116723	GSTCD
ENSG00000141367	6851.75	0.14407	0.0596055	2.41706	0.0156466	0.099582	CLTC
ENSG00000145545	397.631	0.144046	0.0719268	2.00267	0.0452127	0.182662	SRD5A1
ENSG00000102921	3661.43	0.143958	0.0560693	2.56751	0.0102433	0.0788676	N4BP1
ENSG00000078124	677.763	0.143932	0.0693369	2.07583	0.0379095	0.166055	ACER3
ENSG00000184178	203.975	0.143631	0.064702	2.21989	0.026426	0.135411	SCFD2
ENSG00000166483	337.316	0.143623	0.0668056	2.14986	0.0315662	0.15017	WEE1
ENSG00000123684	1987.05	0.143511	0.0624409	2.29834	0.0215424	0.120351	LPGAT1
ENSG00000143374	643.723	0.143236	0.0468132	3.05973	0.00221534	0.0330702	TARS2
ENSG00000003056	2930.97	0.142864	0.0615972	2.31933	0.0203772	0.116588	M6PR
ENSG00000133835	1666.74	0.142731	0.0692683	2.06055	0.039346	0.169332	HSD17B4
ENSG00000187792	172.958	0.142356	0.0616936	2.30746	0.0210292	0.118931	ZNF70
ENSG00000169193	249.758	0.142258	0.0418792	3.39686	0.000681638	0.0166142	CCDC126
ENSG00000167642	439.606	0.141788	0.0669642	2.11737	0.0342282	0.156991	SPINT2
ENSG00000266412	7091.75	0.141377	0.0718368	1.96803	0.0490648	0.190927	NCOA4
ENSG00000137449	581.602	0.141289	0.0715878	1.97365	0.0484215	0.189707	CPEB2
ENSG00000226015	69.8468	0.141135	0.0730133	1.933	0.0532357	0.199889	CCT8P1
ENSG00000197045	1807.11	0.141027	0.0604815	2.33173	0.0197149	0.114158	GMFB
ENSG00000152457	727.662	0.140989	0.033831	4.16745	3.08033e-05	0.00333509	DCLRE1C
ENSG00000113272	239.571	0.140891	0.0463399	3.04037	0.00236286	0.03438	THG1L
ENSG00000119383	1585.7	0.140611	0.0467273	3.00919	0.00261942	0.0363872	PTPA
ENSG00000204310	345.381	0.14035	0.0469273	2.9908	0.00278249	0.0375218	AGPAT1
ENSG00000034152	2296.54	0.140316	0.070915	1.97865	0.047855	0.188734	MAP2K3
ENSG00000169019	466.908	0.139731	0.0519418	2.69014	0.0071421	0.0645665	COMMD8
ENSG00000107745	812.413	0.139672	0.0718779	1.94319	0.0519936	0.197644	MICU1
ENSG00000173786	1834.38	0.139559	0.0534684	2.61012	0.00905094	0.0736154	CNP
ENSG00000175895	1368.55	0.139401	0.0431357	3.23169	0.00123061	0.0240198	PLEKHF2
ENSG00000125827	1751.51	0.139205	0.0690393	2.01632	0.0437666	0.179481	TMX4
ENSG00000085832	2753.99	0.13912	0.0352449	3.94723	7.9062e-05	0.00510096	EPS15
ENSG00000019485	295.575	0.13906	0.0529376	2.62686	0.0086176	0.0717392	PRDM11
ENSG00000160007	1671.65	0.138888	0.0536148	2.59049	0.00958403	0.0762332	ARHGAP35
ENSG00000223960	357.664	0.138791	0.0498431	2.78455	0.00536013	0.0540298	PRKRA-AS1
ENSG00000169599	355.664	0.138697	0.0395961	3.5028	0.000460397	0.0135153	NFU1
ENSG00000183137	136.516	0.138575	0.0543109	2.55152	0.0107254	0.0810999	CEP57L1
ENSG00000173614	197.109	0.138451	0.0471069	2.93908	0.00329188	0.0411472	NMNAT1
ENSG00000120008	3062.59	0.138397	0.053838	2.57063	0.0101515	0.0785838	WDR11
ENSG00000198954	384.041	0.138397	0.0636806	2.17329	0.0297583	0.144893	KIF1BP
ENSG00000125703	416.59	0.138362	0.0583077	2.37296	0.0176462	0.106526	ATG4C
ENSG00000109814	593.344	0.138145	0.0632511	2.18407	0.0289571	0.142704	UGDH
ENSG00000163170	87.1313	0.137981	0.0666969	2.06877	0.0385676	0.167621	BOLA3
ENSG00000137168	381.083	0.137718	0.0431014	3.19521	0.00139729	0.0257958	PPIL1
ENSG00000132589	2978.96	0.137587	0.0675621	2.03645	0.0417051	0.174879	FLOT2
ENSG00000156675	791.444	0.137341	0.0475843	2.88627	0.00389833	0.0448455	RAB11FIP1
ENSG00000248008	81.4767	0.137141	0.0703584	1.94918	0.0512736	0.19649	NRAV
ENSG00000153767	520.786	0.137131	0.048046	2.85416	0.00431505	0.0472474	GTF2E1
ENSG00000125844	1745.43	0.136958	0.0689189	1.98724	0.0468959	0.186432	RRBP1
ENSG00000124243	569.07	0.136755	0.0703569	1.94373	0.051928	0.197592	BCAS4
ENSG00000129625	1691.77	0.136672	0.0596642	2.29069	0.0219815	0.121645	REEP5
ENSG00000100580	1248.78	0.136416	0.0364986	3.73757	0.000185804	0.00786188	TMED8
ENSG00000234127	1668.53	0.136371	0.0343549	3.96946	7.20356e-05	0.00490057	TRIM26
ENSG00000159267	353.239	0.136281	0.0700284	1.94608	0.0516453	0.197037	HLCS
ENSG00000163029	2427.23	0.136218	0.0529689	2.57166	0.0101212	0.0785838	SMC6
ENSG00000164054	3572.11	0.136184	0.0479022	2.84296	0.00446961	0.0482318	SHISA5
ENSG00000068784	413.829	0.13616	0.0447994	3.03934	0.00237098	0.0344438	SRBD1
ENSG00000143669	7278.09	0.13592	0.0666655	2.03883	0.0414668	0.174455	LYST
ENSG00000196378	129.591	0.135869	0.0454764	2.98769	0.00281099	0.0377107	ZNF34
ENSG00000132406	357.532	0.135785	0.0504041	2.69393	0.00706141	0.0642371	TMEM128
ENSG00000267040	126.522	0.135706	0.0602574	2.25211	0.0243154	0.128777
ENSG00000114395	262.851	0.135133	0.0522681	2.58538	0.00972727	0.0767096	CYB561D2
ENSG00000197563	591.522	0.135085	0.0326809	4.13346	3.57344e-05	0.00362972	PIGN
ENSG00000147475	651.015	0.135042	0.05179	2.60749	0.00912094	0.0739919	ERLIN2
ENSG00000211455	994.093	0.134783	0.051291	2.62781	0.0085936	0.0716692	STK38L
ENSG00000165476	725.198	0.134771	0.0671211	2.00788	0.0446562	0.181725	REEP3
ENSG00000167173	1466.94	0.134629	0.0608946	2.21086	0.0270456	0.137093	C15orf39
ENSG00000073921	4829.95	0.134467	0.0688825	1.95212	0.0509244	0.195722	PICALM
ENSG00000136238	3755.7	0.134339	0.0691233	1.94347	0.0519591	0.197592	RAC1
ENSG00000104524	159.698	0.134328	0.0653097	2.05679	0.0397065	0.17041	PYCR3
ENSG00000177692	44.8589	0.134305	0.0686868	1.95532	0.0505452	0.194831	DNAJC28
ENSG00000151746	459.314	0.134298	0.0596386	2.25187	0.0243306	0.128797	BICD1
ENSG00000118894	122.897	0.134035	0.0657745	2.0378	0.04157	0.174689	EEF2KMT
ENSG00000221817	180.684	0.133954	0.0686129	1.95231	0.0509013	0.195675	PPP3CB-AS1
ENSG00000151366	135.418	0.133922	0.064765	2.06782	0.0386569	0.167772	NDUFC2
ENSG00000137714	517.262	0.13376	0.0649959	2.05798	0.0395916	0.169985	FDX1
ENSG00000198039	212.124	0.133445	0.0547305	2.43822	0.0147597	0.096713	ZNF273
ENSG00000137200	2503.82	0.133248	0.0466646	2.85545	0.00429765	0.047141	CMTR1
ENSG00000204217	1455.84	0.13313	0.0501138	2.65655	0.0078944	0.0685075	BMPR2
ENSG00000088986	2061.67	0.132871	0.0637314	2.08487	0.0370816	0.164058	DYNLL1
ENSG00000137806	319.057	0.1327	0.0518288	2.56035	0.0104568	0.079829	NDUFAF1
ENSG00000162688	930.973	0.13262	0.0462301	2.86869	0.00412173	0.0460834	AGL
ENSG00000153339	2349.67	0.132389	0.0351217	3.76943	0.000163623	0.00741783	TRAPPC8
ENSG00000104133	3430.62	0.132327	0.0307178	4.30782	1.64868e-05	0.0022646	SPG11
ENSG00000147202	345.723	0.132325	0.0659926	2.00515	0.044947	0.182137	DIAPH2
ENSG00000131149	1393.69	0.132314	0.0637758	2.07467	0.0380172	0.166368	GSE1
ENSG00000075131	107.599	0.132203	0.0519744	2.54362	0.0109711	0.0820868	TIPIN
ENSG00000091483	781.407	0.132019	0.0418464	3.15484	0.00160584	0.027572	FH
ENSG00000109016	164.966	0.131865	0.0624991	2.10988	0.0348691	0.158435	DHRS7B
ENSG00000103512	2638.47	0.131857	0.0393669	3.34944	0.000809739	0.0184216	NOMO1
ENSG00000085719	2056.54	0.131688	0.0513677	2.56363	0.0103584	0.0794024	CPNE3
ENSG00000136840	617.216	0.131624	0.0590793	2.22792	0.0258859	0.133461	ST6GALNAC4
ENSG00000011376	544.219	0.131416	0.0426258	3.08302	0.00204912	0.0317475	LARS2
ENSG00000144228	903.691	0.130745	0.0619786	2.10951	0.0349005	0.158487	SPOPL
ENSG00000083312	3839.49	0.130513	0.0376189	3.46935	0.000521718	0.0143162	TNPO1
ENSG00000138071	13953.2	0.130299	0.0517734	2.51671	0.0118456	0.0857242	ACTR2
ENSG00000188725	728.959	0.130163	0.049816	2.61289	0.00897812	0.0733472	SMIM15
ENSG00000118496	997.466	0.129923	0.0623776	2.08284	0.0372654	0.16438	FBXO30
ENSG00000158161	1307.15	0.129812	0.0649671	1.99812	0.0457039	0.183765	EYA3
ENSG00000102034	1824.67	0.129776	0.0558145	2.32514	0.0200647	0.115393	ELF4
ENSG00000100764	876.967	0.129316	0.0608234	2.12609	0.033496	0.155453	PSMC1
ENSG00000139083	2375.67	0.129162	0.0524993	2.46027	0.0138833	0.0932615	ETV6
ENSG00000184432	3119.96	0.128815	0.0426384	3.02111	0.00251848	0.0355495	COPB2
ENSG00000189159	724.059	0.128694	0.0461627	2.78785	0.00530597	0.0539269	JPT1
ENSG00000101040	1173.1	0.128628	0.0559755	2.29793	0.0215658	0.120351	ZMYND8
ENSG00000084073	1177.97	0.128562	0.0531431	2.41917	0.0155558	0.0991831	ZMPSTE24
ENSG00000101639	1431.41	0.128526	0.062123	2.06889	0.0385562	0.167611	CEP192
ENSG00000119522	611.695	0.128516	0.0522129	2.46138	0.0138405	0.0930418	DENND1A
ENSG00000162511	26876.5	0.12839	0.0591676	2.16994	0.0300117	0.145597	LAPTM5
ENSG00000085760	749.668	0.128338	0.0427834	2.99971	0.0027024	0.0370644	MTIF2
ENSG00000113356	102.316	0.128296	0.0615988	2.08277	0.0372721	0.16438	POLR3G
ENSG00000198373	1827.02	0.127995	0.0427846	2.99162	0.00277499	0.0375011	WWP2
ENSG00000108439	164.662	0.127886	0.058705	2.17844	0.0293729	0.14387	PNPO
ENSG00000138346	173.4	0.127838	0.0496566	2.57443	0.0100404	0.0783067	DNA2
ENSG00000154059	409.467	0.127535	0.0591912	2.15462	0.0311915	0.149081	IMPACT
ENSG00000136247	325.162	0.127259	0.0485904	2.61902	0.00881823	0.0724866	ZDHHC4
ENSG00000087053	695.21	0.127258	0.0395936	3.21409	0.00130858	0.0248307	MTMR2
ENSG00000185164	5532.82	0.127196	0.039039	3.25819	0.00112126	0.0225799	NOMO2
ENSG00000196072	1124.37	0.126995	0.0591906	2.14553	0.0319103	0.151065	BLOC1S2
ENSG00000123415	311.672	0.126699	0.0508382	2.49221	0.0126951	0.0889818	SMUG1
ENSG00000121579	4341.04	0.126609	0.0484825	2.61143	0.00901656	0.0734982	NAA50
ENSG00000163755	944.365	0.126561	0.0582418	2.17304	0.0297777	0.144893	HPS3
ENSG00000163565	8005.97	0.126547	0.0533227	2.37322	0.0176337	0.106485	IFI16
ENSG00000170310	278.439	0.126496	0.0507148	2.49426	0.0126219	0.0886709	STX8
ENSG00000180917	1335.28	0.1264	0.0406213	3.11166	0.00186036	0.0302185	CMTR2
ENSG00000124201	4672.96	0.126293	0.0488011	2.58792	0.00965586	0.0765119	ZNFX1
ENSG00000143493	565.303	0.126277	0.0437326	2.88747	0.00388351	0.0447869	INTS7
ENSG00000140365	413.71	0.126263	0.0518918	2.43319	0.0149665	0.0974116	COMMD4
ENSG00000213390	571.472	0.12626	0.0563606	2.24022	0.0250765	0.131125	ARHGAP19
ENSG00000197008	274.839	0.126121	0.0496346	2.54098	0.0110542	0.0825408	ZNF138
ENSG00000115758	2718.46	0.125986	0.0566076	2.22559	0.0260414	0.134037	ODC1
ENSG00000189298	232.074	0.12549	0.0513097	2.44574	0.0144557	0.0956608	ZKSCAN3
ENSG00000130348	765.479	0.125442	0.0417791	3.0025	0.00267768	0.0368626	QRSL1
ENSG00000101945	160.773	0.125341	0.0463079	2.7067	0.00679562	0.0626731	SUV39H1
ENSG00000112144	630.747	0.125143	0.0518046	2.41568	0.015706	0.0998911	ICK
ENSG00000241553	1675.43	0.125069	0.0578556	2.16174	0.0306381	0.14747	ARPC4
ENSG00000135537	67.5497	0.125029	0.0605516	2.06483	0.0389391	0.16848	AFG1L
ENSG00000276180	164.592	0.124916	0.060176	2.07584	0.037909	0.166055	HIST1H4I
ENSG00000104343	839.475	0.124877	0.0517989	2.41081	0.0159172	0.100574	UBE2W
ENSG00000104142	783.51	0.124799	0.0543785	2.295	0.021733	0.120893	VPS18
ENSG00000106524	402.241	0.124717	0.0463551	2.69047	0.00713517	0.0645665	ANKMY2
ENSG00000110756	1182.75	0.124554	0.0395505	3.14924	0.00163695	0.0277949	HPS5
ENSG00000076513	2498.57	0.124551	0.0375865	3.31372	0.000920631	0.0198189	ANKRD13A
ENSG00000115233	974.544	0.124527	0.0601144	2.0715	0.0383124	0.166971	PSMD14
ENSG00000280088	135.251	0.124217	0.0625087	1.9872	0.0468998	0.186432
ENSG00000254999	1737.59	0.12419	0.0419586	2.95983	0.00307809	0.0396469	BRK1
ENSG00000136870	580.491	0.124116	0.0395534	3.13793	0.00170144	0.028418	ZNF189
ENSG00000033170	499.242	0.124101	0.0562826	2.20497	0.0274563	0.138408	FUT8
ENSG00000120451	1777.11	0.124005	0.0508398	2.43912	0.0147229	0.0965752	SNX19
ENSG00000139133	157.045	0.123972	0.0520314	2.38264	0.017189	0.105027	ALG10
ENSG00000213793	331.035	0.123942	0.0510951	2.42571	0.0152785	0.0983617	ZNF888
ENSG00000148572	700.906	0.123885	0.0504322	2.45647	0.014031	0.0938665	NRBF2
ENSG00000002834	7025.37	0.123779	0.0579856	2.13464	0.0327902	0.153632	LASP1
ENSG00000077514	454.597	0.123525	0.042376	2.91499	0.00355705	0.0429222	POLD3
ENSG00000025772	558.257	0.123459	0.0460446	2.6813	0.00733366	0.0655259	TOMM34
ENSG00000198824	968.635	0.123079	0.0334238	3.68237	0.000231072	0.00901082	CHAMP1
ENSG00000075142	657.989	0.122698	0.045591	2.69129	0.00711772	0.0645492	SRI
ENSG00000004961	453.857	0.12231	0.0472878	2.5865	0.0096955	0.076622	HCCS
ENSG00000166747	3360.88	0.122169	0.0266178	4.58976	4.43755e-06	0.00115039	AP1G1
ENSG00000114480	477.861	0.122032	0.0589119	2.07144	0.0383181	0.166971	GBE1
ENSG00000197863	157.356	0.121883	0.0439148	2.77544	0.00551276	0.0551941	ZNF790
ENSG00000165672	1468.71	0.121818	0.0483093	2.52162	0.0116815	0.0852106	PRDX3
ENSG00000137500	776.219	0.121731	0.0376402	3.23407	0.0012204	0.0239219	CCDC90B
ENSG00000119523	1065.31	0.121708	0.0434698	2.79983	0.00511298	0.0525822	ALG2
ENSG00000135535	7560.94	0.121664	0.0446115	2.72718	0.00638773	0.060542	CD164
ENSG00000124641	367.528	0.121644	0.0419871	2.89716	0.00376552	0.0442299	MED20
ENSG00000120992	1390.01	0.121567	0.0377357	3.22155	0.00127501	0.0244202	LYPLA1
ENSG00000140374	1082.91	0.121426	0.03892	3.1199	0.00180914	0.0296455	ETFA
ENSG00000151229	196.574	0.121211	0.0623566	1.94384	0.0519153	0.197592	SLC2A13
ENSG00000133393	890.049	0.121163	0.0467978	2.58908	0.00962326	0.0763803	FOPNL
ENSG00000100592	699.926	0.121104	0.0586266	2.06569	0.0388574	0.168236	DAAM1
ENSG00000108819	3430.97	0.121064	0.0476732	2.53947	0.0111022	0.0826693	PPP1R9B
ENSG00000129534	1195.09	0.121052	0.0374374	3.23345	0.00122306	0.0239485	MIS18BP1
ENSG00000155115	647.11	0.120777	0.0443912	2.72074	0.00651356	0.061134	GTF3C6
ENSG00000136930	1600.49	0.12071	0.0547771	2.20365	0.0275488	0.138618	PSMB7
ENSG00000197808	229.847	0.120559	0.0548316	2.19871	0.0278984	0.139667	ZNF461
ENSG00000110871	381.954	0.12026	0.050282	2.39172	0.0167698	0.10344	COQ5
ENSG00000167315	794.005	0.120168	0.0601042	1.99932	0.0455737	0.183511	ACAA2
ENSG00000179958	334.734	0.120092	0.0538348	2.23074	0.0256981	0.132865	DCTPP1
ENSG00000151466	323.46	0.120065	0.0499287	2.40473	0.0161842	0.101288	SCLT1
ENSG00000155850	843.155	0.119918	0.0533322	2.2485	0.0245442	0.129481	SLC26A2
ENSG00000178177	471.063	0.119726	0.0490923	2.43879	0.0147365	0.0965954	LCORL
ENSG00000082898	6754.16	0.119597	0.033622	3.55712	0.000374943	0.0118861	XPO1
ENSG00000143537	511.099	0.119556	0.0529137	2.25946	0.0238548	0.127267	ADAM15
ENSG00000156384	203.919	0.119415	0.0529176	2.25662	0.024032	0.127879	SFR1
ENSG00000140265	980.437	0.119329	0.0342816	3.48083	0.000499863	0.014052	ZSCAN29
ENSG00000197971	5288.89	0.119243	0.0498272	2.39313	0.0167053	0.103265	MBP
ENSG00000100596	2148.5	0.11918	0.04637	2.57019	0.0101643	0.0785838	SPTLC2
ENSG00000189050	660.964	0.119143	0.0596906	1.99601	0.0459327	0.183935	RNFT1
ENSG00000153395	3660.91	0.119027	0.0603874	1.97106	0.0487174	0.190179	LPCAT1
ENSG00000198843	2178.63	0.11901	0.0508808	2.339	0.0193353	0.112693	SELENOT
ENSG00000101350	1146.3	0.118973	0.0601877	1.9767	0.0480751	0.18903	KIF3B
ENSG00000101445	5745.78	0.118891	0.0583812	2.03645	0.0417047	0.174879	PPP1R16B
ENSG00000101363	332.074	0.11889	0.0500355	2.37611	0.0174963	0.106104	MANBAL
ENSG00000130772	442.442	0.118858	0.040969	2.90118	0.00371765	0.0440046	MED18
ENSG00000124786	520.187	0.118776	0.0330846	3.59008	0.00033058	0.0111441	SLC35B3
ENSG00000083817	172.286	0.118734	0.0582647	2.03783	0.0415667	0.174689	ZNF416
ENSG00000123297	281.397	0.118715	0.0452488	2.62361	0.00870037	0.0720374	TSFM
ENSG00000040275	295.919	0.118589	0.0547033	2.16785	0.0301701	0.146096	SPDL1
ENSG00000160993	229.236	0.118522	0.0454743	2.60636	0.00915089	0.0741009	ALKBH4
ENSG00000248049	122.356	0.118463	0.049168	2.40935	0.015981	0.100804	UBA6-AS1
ENSG00000149636	310.006	0.118448	0.0426306	2.77848	0.00546145	0.054811	DSN1
ENSG00000018510	1288.48	0.118428	0.0440228	2.69016	0.00714179	0.0645665	AGPS
ENSG00000101457	411.026	0.118396	0.0552633	2.14241	0.0321608	0.151893	DNTTIP1
ENSG00000162972	177.732	0.118023	0.044263	2.66639	0.00766698	0.067424	MAIP1
ENSG00000212978	155.919	0.11799	0.0575768	2.04926	0.0404362	0.172232
ENSG00000147383	291.977	0.117665	0.0459198	2.56241	0.0103949	0.079543	NSDHL
ENSG00000130150	611.825	0.117623	0.0605246	1.94339	0.051969	0.197592	MOSPD2
ENSG00000174891	341.873	0.117571	0.0501911	2.34247	0.0191567	0.111972	RSRC1
ENSG00000119977	742.799	0.117546	0.0439518	2.67443	0.00748559	0.0664754	TCTN3
ENSG00000136147	2351.33	0.11754	0.0520242	2.25934	0.0238623	0.12727	PHF11
ENSG00000094841	316.141	0.117521	0.0391557	3.00139	0.00268753	0.0369431	UPRT
ENSG00000161057	1680.75	0.117468	0.0417332	2.81474	0.00488166	0.0511895	PSMC2
ENSG00000145916	534.39	0.117464	0.0431836	2.7201	0.00652618	0.061134	RMND5B
ENSG00000104812	998.342	0.116956	0.0488332	2.39501	0.0166198	0.103033	GYS1
ENSG00000129566	3324.1	0.116934	0.0419044	2.79051	0.00526258	0.0536637	TEP1
ENSG00000138182	709.204	0.116908	0.0493385	2.36952	0.0178113	0.107158	KIF20B
ENSG00000100266	1754.97	0.116772	0.0589808	1.97983	0.0477229	0.188495	PACSIN2
ENSG00000144040	382.179	0.116736	0.0511494	2.28225	0.0224744	0.123245	SFXN5
ENSG00000174718	9426.65	0.116714	0.0412903	2.82666	0.00470364	0.0499568	KIAA1551
ENSG00000131475	529.114	0.116505	0.0468221	2.48826	0.0128371	0.0895309	VPS25
ENSG00000132801	192.423	0.11646	0.0431043	2.70182	0.00689619	0.0631813	ZSWIM3
ENSG00000134049	377.572	0.116386	0.0447889	2.59855	0.00936187	0.0750798	IER3IP1
ENSG00000159388	10397.1	0.116096	0.0502627	2.30978	0.0209004	0.118549	BTG2
ENSG00000090432	595.692	0.116013	0.0473099	2.4522	0.0141986	0.0944828	MUL1
ENSG00000134590	356.906	0.11592	0.0568205	2.0401	0.0413403	0.174161	RTL8C
ENSG00000123104	2477.95	0.11575	0.0490414	2.36026	0.0182623	0.108799	ITPR2
ENSG00000237190	178.729	0.115692	0.049688	2.32837	0.0198924	0.114705	CDKN2AIPNL
ENSG00000245680	463.273	0.115307	0.0495137	2.32878	0.0198705	0.114634	ZNF585B
ENSG00000074266	766.242	0.115282	0.0292535	3.9408	8.12105e-05	0.00515435	EED
ENSG00000198551	451.669	0.115114	0.0401538	2.86683	0.0041461	0.0462504	ZNF627
ENSG00000004455	1905.99	0.11482	0.0349042	3.28957	0.00100341	0.0209634	AK2
ENSG00000160190	816.131	0.114727	0.0462711	2.47945	0.0131587	0.0908473	SLC37A1
ENSG00000101608	2941.25	0.114574	0.0553084	2.07155	0.0383075	0.166971	MYL12A
ENSG00000007341	161.17	0.114536	0.0541715	2.11432	0.0344883	0.157601	ST7L
ENSG00000131236	5318.88	0.114366	0.0547371	2.08937	0.0366741	0.162959	CAP1
ENSG00000129493	369.113	0.114228	0.0567046	2.01444	0.043963	0.180099	HEATR5A
ENSG00000162736	2170.72	0.114193	0.0540533	2.1126	0.0346352	0.157931	NCSTN
ENSG00000178700	345.007	0.11416	0.0586104	1.94777	0.0514424	0.19668	DHFR2
ENSG00000135452	478.029	0.114101	0.0381057	2.99433	0.0027505	0.0373621	TSPAN31
ENSG00000158769	303.747	0.114092	0.0572416	1.99316	0.0462438	0.184795	F11R
ENSG00000116288	2067.12	0.113944	0.0373673	3.04929	0.00229382	0.0337491	PARK7
ENSG00000108826	335.066	0.1138	0.0438808	2.5934	0.00950318	0.0757538	MRPL27
ENSG00000028277	4923.08	0.113663	0.0539979	2.10495	0.0352954	0.159532	POU2F2
ENSG00000111602	912.958	0.113483	0.0478859	2.36987	0.0177944	0.107158	TIMELESS
ENSG00000135211	246.524	0.113475	0.0536081	2.11676	0.0342803	0.157112	TMEM60
ENSG00000004142	1196.32	0.113289	0.0349388	3.24248	0.00118493	0.0233761	POLDIP2
ENSG00000179387	600.116	0.1132	0.0466638	2.42586	0.015272	0.0983567	ELMOD2
ENSG00000165102	1834.94	0.113147	0.0505825	2.23689	0.0252938	0.131774	HGSNAT
ENSG00000076242	895.415	0.112998	0.0426518	2.64931	0.00806571	0.0691849	MLH1
ENSG00000169118	944.064	0.112845	0.0338388	3.33479	0.000853651	0.0189762	CSNK1G1
ENSG00000184675	361.547	0.112832	0.0557486	2.02395	0.0429756	0.177715	AMER1
ENSG00000137404	245.797	0.11269	0.0555436	2.02885	0.0424731	0.176709	NRM
ENSG00000100220	1469.37	0.11268	0.0535721	2.10333	0.0354366	0.159786	RTCB
ENSG00000117593	574.148	0.112623	0.0364661	3.08844	0.0020121	0.0315037	DARS2
ENSG00000164961	1137.91	0.11233	0.041869	2.6829	0.00729859	0.0654031	WASHC5
ENSG00000012174	271.535	0.112302	0.0533775	2.10393	0.0353849	0.159709	MBTPS2
ENSG00000083093	380.907	0.112276	0.038619	2.90727	0.003646	0.0436551	PALB2
ENSG00000109919	1011.19	0.111995	0.0416823	2.68688	0.00721233	0.0648828	MTCH2
ENSG00000013374	2664.1	0.111783	0.0518056	2.15774	0.0309481	0.148284	NUB1
ENSG00000114988	328.668	0.111665	0.0469995	2.37588	0.0175072	0.106104	LMAN2L
ENSG00000096080	130.606	0.111653	0.0523279	2.13371	0.0328665	0.153741	MRPS18A
ENSG00000129071	1566.97	0.111602	0.0400257	2.78827	0.00529902	0.0538957	MBD4
ENSG00000136319	360.344	0.111569	0.0385292	2.89571	0.00378305	0.0443508	TTC5
ENSG00000241852	147.68	0.111525	0.0564209	1.97665	0.0480809	0.18903	C8orf58
ENSG00000138814	1340.45	0.111469	0.0403658	2.76147	0.00575426	0.0565767	PPP3CA
ENSG00000138867	1986.32	0.111457	0.0378328	2.94604	0.00321866	0.0406608	GUCD1
ENSG00000160410	3302.84	0.111433	0.0571388	1.95021	0.0511508	0.196183	SHKBP1
ENSG00000146757	745.639	0.111418	0.0469967	2.37076	0.0177515	0.106985	ZNF92
ENSG00000114744	701.886	0.111325	0.0361538	3.07922	0.00207544	0.0319136	COMMD2
ENSG00000037749	523.683	0.11113	0.045508	2.442	0.0146062	0.0961785	MFAP3
ENSG00000105953	2783.01	0.111061	0.049738	2.23292	0.0255542	0.132344	OGDH
ENSG00000054219	902.077	0.111015	0.0572177	1.94022	0.0523525	0.198149	LY75
ENSG00000185127	638.643	0.110943	0.0448704	2.47252	0.0134165	0.0916643	C6orf120
ENSG00000070269	527.879	0.110748	0.0382868	2.8926	0.00382062	0.0444836	TMEM260
ENSG00000249471	168.826	0.110552	0.0527395	2.0962	0.0360649	0.161393	ZNF324B
ENSG00000181315	668.452	0.110537	0.0446263	2.47696	0.0132509	0.0911421	ZNF322
ENSG00000165417	1630.67	0.110479	0.0372237	2.96797	0.0029977	0.0391316	GTF2A1
ENSG00000116489	6687.85	0.110156	0.051419	2.14232	0.0321676	0.151893	CAPZA1
ENSG00000172500	742.563	0.110052	0.0386568	2.8469	0.00441475	0.0479398	FIBP
ENSG00000198554	186.263	0.109957	0.0518823	2.11936	0.0340603	0.156509	WDHD1
ENSG00000077721	1787.42	0.109945	0.0416242	2.64138	0.00825691	0.0701743	UBE2A
ENSG00000070882	981.851	0.109738	0.0529199	2.07367	0.0381102	0.166617	OSBPL3
ENSG00000167977	925.135	0.109714	0.0456605	2.40282	0.016269	0.10168	KCTD5
ENSG00000132963	1214.32	0.109412	0.0538533	2.03167	0.0421867	0.175875	POMP
ENSG00000172888	959.417	0.109383	0.0343458	3.18476	0.00144874	0.0262293	ZNF621
ENSG00000135482	276.497	0.10933	0.0476048	2.29662	0.0216405	0.120592	ZC3H10
ENSG00000030110	823.675	0.1092	0.0520482	2.09805	0.035901	0.160895	BAK1
ENSG00000230989	924.339	0.109197	0.0524757	2.0809	0.0374427	0.164873	HSBP1
ENSG00000171148	1335.85	0.109171	0.0485912	2.24672	0.0246581	0.129962	TADA3
ENSG00000004700	1333.73	0.109058	0.035342	3.0858	0.00203008	0.031601	RECQL
ENSG00000110315	716.597	0.109044	0.0425485	2.56281	0.0103828	0.0795276	RNF141
ENSG00000188917	731.438	0.109034	0.0416352	2.61878	0.00882441	0.0724866	TRMT2B
ENSG00000197779	361.117	0.109017	0.0414557	2.62972	0.00854561	0.0714632	ZNF81
ENSG00000090612	482.804	0.108964	0.0398169	2.73663	0.00620713	0.0593105	ZNF268
ENSG00000143158	315.724	0.108877	0.0375208	2.90178	0.00371044	0.0439857	MPC2
ENSG00000108946	5889.96	0.108758	0.0434869	2.50093	0.0123868	0.0879779	PRKAR1A
ENSG00000075151	1802.24	0.108501	0.0381215	2.84618	0.00442477	0.0480202	EIF4G3
ENSG00000105676	514.158	0.108253	0.0428532	2.52612	0.0115329	0.0845829	ARMC6
ENSG00000074370	6772.44	0.108111	0.0546149	1.97951	0.0477586	0.188495	ATP2A3
ENSG00000134852	654.293	0.108094	0.0409935	2.63686	0.00836771	0.0706496	CLOCK
ENSG00000137494	223.568	0.108005	0.0548159	1.97033	0.0488005	0.190422	ANKRD42
ENSG00000103671	773.108	0.107847	0.0437968	2.46244	0.0137996	0.092951	TRIP4
ENSG00000166908	785.144	0.107822	0.0282924	3.811	0.000138406	0.00676666	PIP4K2C
ENSG00000120519	298.929	0.107579	0.0525544	2.04701	0.040657	0.172706	SLC10A7
ENSG00000075790	687.789	0.107568	0.0510718	2.10622	0.0351854	0.159238	BCAP29
ENSG00000086504	766.714	0.107539	0.04057	2.6507	0.00803256	0.0691739	MRPL28
ENSG00000206337	3086.1	0.107461	0.0542032	1.98256	0.047417	0.187575	HCP5
ENSG00000179476	143.696	0.107428	0.0442516	2.42765	0.0151968	0.0981792	C14orf28
ENSG00000107290	7324.51	0.107362	0.032096	3.34501	0.000822793	0.0185661	SETX
ENSG00000197386	4320.48	0.107019	0.0340527	3.14275	0.00167369	0.0281589	HTT
ENSG00000103005	1162.78	0.10693	0.0506714	2.11026	0.0348363	0.158359	USB1
ENSG00000138231	489.934	0.106633	0.0422092	2.5263	0.0115271	0.0845829	DBR1
ENSG00000135392	425.234	0.106548	0.0460456	2.31396	0.0206697	0.117713	DNAJC14
ENSG00000122068	3000	0.106515	0.0342082	3.11373	0.00184736	0.0300784	FYTTD1
ENSG00000140463	413.452	0.106409	0.0414089	2.56971	0.0101784	0.0785838	BBS4
ENSG00000029364	1302.13	0.106357	0.0303909	3.49964	0.000465887	0.0135577	SLC39A9
ENSG00000166348	172.987	0.106127	0.0492361	2.15546	0.0311257	0.148844	USP54
ENSG00000113312	1110.18	0.106094	0.0319255	3.32316	0.000890026	0.0194558	TTC1
ENSG00000151304	306.766	0.106062	0.0432276	2.45356	0.0141449	0.0942616	SRFBP1
ENSG00000163214	556.826	0.105943	0.0537126	1.9724	0.0485641	0.189919	DHX57
ENSG00000099875	5398.13	0.105907	0.0437674	2.41977	0.0155302	0.0991499	MKNK2
ENSG00000234745	59808.2	0.105862	0.0528965	2.00131	0.0453593	0.183036	HLA-B
ENSG00000135679	1785.16	0.105775	0.0500435	2.11365	0.0345449	0.157771	MDM2
ENSG00000142507	1164.56	0.105651	0.0460923	2.29217	0.0218959	0.121317	PSMB6
ENSG00000117748	1480.27	0.105497	0.0412991	2.55445	0.0106355	0.0807249	RPA2
ENSG00000135828	598.078	0.105492	0.0488145	2.16108	0.0306892	0.147561	RNASEL
ENSG00000101367	3534.07	0.105121	0.0517891	2.02979	0.0423777	0.176501	MAPRE1
ENSG00000130338	1214.64	0.105073	0.0388516	2.70447	0.00684144	0.062805	TULP4
ENSG00000148730	3468.05	0.105023	0.0433415	2.42316	0.0153862	0.0986374	EIF4EBP2
ENSG00000167562	468.603	0.104971	0.0515443	2.03652	0.0416984	0.174879	ZNF701
ENSG00000006715	1705	0.104955	0.0350762	2.99221	0.00276963	0.0374991	VPS41
ENSG00000153066	1201.85	0.104936	0.0411556	2.54975	0.0107801	0.0812175	TXNDC11
ENSG00000145725	1643.71	0.104712	0.0396894	2.63828	0.00833277	0.0704802	PPIP5K2
ENSG00000146842	479.044	0.104315	0.0393542	2.65066	0.00803344	0.0691739	TMEM209
ENSG00000132906	414.304	0.104196	0.0433787	2.40202	0.0163049	0.101766	CASP9
ENSG00000104823	717.859	0.10416	0.0418211	2.4906	0.0127527	0.0891347	ECH1
ENSG00000159658	3737.47	0.104099	0.03282	3.17182	0.00151485	0.0267327	EFCAB14
ENSG00000243317	1035.75	0.103773	0.0480723	2.15868	0.0308747	0.148157	STMP1
ENSG00000164332	1194.34	0.103753	0.0359644	2.88488	0.00391567	0.0448937	UBLCP1
ENSG00000179886	245.239	0.103691	0.0531316	1.9516	0.0509861	0.195755	TIGD5
ENSG00000064999	692.514	0.103568	0.0416007	2.48956	0.0127901	0.0893074	ANKS1A
ENSG00000006007	789.396	0.103416	0.0512965	2.01604	0.0437955	0.179532	GDE1
ENSG00000111229	3979.16	0.103384	0.0492102	2.10086	0.0356529	0.16029	ARPC3
ENSG00000213064	2159.12	0.103346	0.0305762	3.37993	0.000725045	0.0172196	SFT2D2
ENSG00000119421	371.309	0.103228	0.0436195	2.36656	0.0179541	0.107643	NDUFA8
ENSG00000174165	460.263	0.102914	0.050254	2.04788	0.0405714	0.172621	ZDHHC24
ENSG00000006576	958.332	0.102569	0.0383891	2.67184	0.00754371	0.0667545	PHTF2
ENSG00000134014	863.603	0.102358	0.0296691	3.44999	0.000560616	0.0150199	ELP3
ENSG00000198521	580.577	0.102304	0.0399463	2.56105	0.0104356	0.0797336	ZNF43
ENSG00000188321	582.144	0.102223	0.0485651	2.10487	0.0353022	0.159532	ZNF559
ENSG00000135336	547.558	0.102201	0.0318396	3.20987	0.00132795	0.0251205	ORC3
ENSG00000122591	841.159	0.102138	0.0465734	2.19305	0.0283038	0.140939	FAM126A
ENSG00000172757	7240.59	0.102099	0.0525111	1.94433	0.0518561	0.197592	CFL1
ENSG00000164970	581.548	0.102022	0.0438225	2.32806	0.0199088	0.114764	FAM219A
ENSG00000162623	581.835	0.102011	0.0422583	2.41398	0.0157795	0.100151	TYW3
ENSG00000094916	2193.74	0.101995	0.0402461	2.53429	0.0112674	0.0833677	CBX5
ENSG00000118564	2189.94	0.10195	0.0445061	2.29069	0.0219811	0.121645	FBXL5
[truncated: 2,716 more rows]

## Sheet: Supplementary Table 8C
Supplementary table 8C: Differentially expressed genes between M.tb-infected vs M.tb-uninfected infants among CMV-uninfected infants
ensembl	baseMean	log2FoldChange	lfcSE	stat	pvalue	padj	hgnc_symbol
ENSG00000229807	2227.15	7.78356	1.07014	7.27342	3.505e-13	3.51692e-09	XIST
ENSG00000282651	55.1462	5.5637	1.9873	2.79963	0.00511615	0.038196	IGHV5-10-1
ENSG00000204792	67.2868	5.34337	2.15483	2.47972	0.0131486	0.0732149	LINC01291
ENSG00000274512	30.3375	4.48934	0.644282	6.96796	3.21559e-12	9.21863e-09	TBC1D3L
ENSG00000162627	18.1237	4.19571	0.716784	5.85353	4.81255e-09	2.61023e-06	SNX7
ENSG00000181359	7.06903	4.14506	0.8884	4.66576	3.07479e-06	0.000237326	HSP90AA6P
ENSG00000096696	15.1865	3.31094	0.662842	4.99506	5.88162e-07	7.08188e-05	DSP
ENSG00000181126	35.3617	3.29325	0.960604	3.42832	0.000607335	0.00914389	HLA-V
ENSG00000206073	10.1896	3.00752	1.15366	2.60694	0.00913552	0.0570593	SERPINB4
ENSG00000260409	6.37878	2.66021	0.496137	5.36185	8.2373e-08	1.81286e-05
ENSG00000227582	8.09174	2.65	1.34519	1.96998	0.0488407	0.178368	ADGRF5P1
ENSG00000112116	25.0471	2.61143	1.0113	2.58225	0.00981578	0.0599462	IL17F
ENSG00000132972	22.2824	2.59607	0.772547	3.3604	0.000778296	0.0106923	RNF17
ENSG00000168079	7.03143	2.57017	0.864136	2.97427	0.00293691	0.0262764	SCARA5
ENSG00000260518	19.5823	2.49107	0.811719	3.06888	0.0021486	0.0213139	BMS1P8
ENSG00000112139	262.651	2.491	0.836724	2.97709	0.00290998	0.026113	MDGA1
ENSG00000262406	7.0537	2.4876	0.905831	2.74621	0.00602878	0.0427813	MMP12
ENSG00000282639	42.6098	2.44122	1.24997	1.95302	0.0508176	0.183386	IGHV3-64D
ENSG00000153904	6.63317	2.44077	0.4616	5.28763	1.23911e-07	2.27848e-05	DDAH1
ENSG00000153404	6.43798	2.40479	0.757457	3.17482	0.00149929	0.0167154	PLEKHG4B
ENSG00000234665	8.76759	2.15899	1.00875	2.14027	0.032333	0.135601
ENSG00000166396	345.046	2.13051	0.693557	3.07186	0.00212726	0.0211769	SERPINB7
ENSG00000162366	13.0047	2.07861	0.528236	3.93501	8.31943e-05	0.00234157	PDZK1IP1
ENSG00000186831	35.5572	2.05557	0.544289	3.77661	0.000158979	0.00363371	KRT17P2
ENSG00000169908	87.8032	2.03028	0.638229	3.18112	0.00146705	0.0165027	TM4SF1
ENSG00000247765	9.56681	1.99805	0.365163	5.47168	4.45789e-08	1.18933e-05
ENSG00000104361	62.1447	1.95795	0.374928	5.2222	1.76814e-07	2.98177e-05	NIPAL2
ENSG00000211968	24.249	1.94591	0.460038	4.2299	2.33797e-05	0.000975436	IGHV1-58
ENSG00000224114	28.3241	1.93098	0.92428	2.08918	0.0366919	0.147621
ENSG00000154537	5.83039	1.92163	0.476337	4.03419	5.47919e-05	0.00174811	FAM27C
ENSG00000211642	77.5885	1.90218	0.528563	3.59879	0.000319707	0.00599706	IGLV10-54
ENSG00000142549	73.3041	1.88508	0.579456	3.25319	0.00114116	0.0139554	IGLON5
ENSG00000229604	14.3756	1.83822	0.820616	2.24005	0.0250877	0.114293	MTATP8P2
ENSG00000273295	45.859	1.83771	0.903399	2.03421	0.04193	0.16092
ENSG00000211964	223.93	1.83587	0.257788	7.12162	1.06664e-12	3.56757e-09	IGHV3-48
ENSG00000184368	19.5235	1.79725	0.531709	3.38013	0.000724511	0.010168	MAP7D2
ENSG00000162897	9.4088	1.78873	0.783098	2.28417	0.0223615	0.105539	FCAMR
ENSG00000013588	37.7878	1.75763	0.753127	2.33378	0.0196072	0.0964403	GPRC5A
ENSG00000187624	34.8423	1.73186	0.295208	5.86657	4.44914e-09	2.55101e-06	C17orf97
ENSG00000262703	9.79336	1.72954	0.388989	4.44624	8.73878e-06	0.000488495
ENSG00000132688	8.95379	1.7173	0.672717	2.55278	0.0106868	0.0636524	NES
ENSG00000225523	13.24	1.71102	0.480228	3.56294	0.000366718	0.00650689	IGKV6D-21
ENSG00000100285	235.546	1.70597	0.407451	4.18694	2.82743e-05	0.00110606	NEFH
ENSG00000007038	22.3311	1.69111	0.370482	4.56461	5.00422e-06	0.000329261	PRSS21
ENSG00000058085	7.01811	1.6809	0.63547	2.64512	0.00816615	0.0527619	LAMC2
ENSG00000172724	59.0836	1.68003	0.628722	2.67214	0.00753703	0.0497707	CCL19
ENSG00000154646	7.1871	1.66799	0.675551	2.46907	0.0135463	0.0747861	TMPRSS15
ENSG00000185736	79.4218	1.6546	0.745886	2.2183	0.0265343	0.118595	ADARB2
ENSG00000146938	5.78336	1.65022	0.520224	3.17213	0.00151324	0.0168056	NLGN4X
ENSG00000130702	205.2	1.64609	0.281039	5.85714	4.70897e-09	2.61023e-06	LAMA5
ENSG00000105784	10.6629	1.61803	0.55522	2.91422	0.00356582	0.0298038	RUNDC3B
ENSG00000182912	9.07996	1.6118	0.506224	3.18398	0.00145267	0.0164145	TSPEAR-AS2
ENSG00000197927	39.1447	1.59965	0.599955	2.66629	0.00766938	0.0504785	C2orf27A
ENSG00000198963	6.68119	1.59616	0.739644	2.158	0.0309275	0.131774	RORB
ENSG00000127318	15.2265	1.56665	0.810452	1.93306	0.0532289	0.1898	IL22
ENSG00000211935	170.252	1.54818	0.430229	3.5985	0.000320063	0.00599706	IGHV1-3
ENSG00000106633	10.5356	1.52914	0.397853	3.84348	0.0001213	0.0030428	GCK
ENSG00000148225	44.4249	1.52038	0.270963	5.61102	2.01136e-08	7.61585e-06	WDR31
ENSG00000211933	64.7617	1.51996	0.388368	3.91372	9.08861e-05	0.0024815	IGHV6-1
ENSG00000229390	30.0511	1.50659	0.531269	2.83583	0.00457065	0.0354009	MICD
ENSG00000197915	11.7016	1.49756	0.672106	2.22816	0.0258701	0.116639	HRNR
ENSG00000196183	11.6989	1.48551	0.710799	2.08991	0.0366257	0.14743	RPS2P4
ENSG00000249790	26.1516	1.48485	0.354916	4.18368	2.86832e-05	0.00110908
ENSG00000102048	20.1826	1.47323	0.397863	3.70285	0.000213192	0.00449992	ASB9
ENSG00000101057	234.982	1.46884	0.258322	5.68611	1.29968e-08	5.57969e-06	MYBL2
ENSG00000205038	11.8016	1.46469	0.545627	2.68441	0.00726574	0.0484867	PKHD1L1
ENSG00000144115	20.5254	1.46339	0.673925	2.17145	0.0298973	0.128778	THNSL2
ENSG00000237004	9.90077	1.46175	0.409965	3.56554	0.000363104	0.00647139	ZNRF2P1
ENSG00000225569	7.84642	1.45736	0.427174	3.41162	0.000645791	0.00949246	CCT4P2
ENSG00000235890	13.0152	1.45254	0.451416	3.21774	0.00129204	0.0151187	TSPEAR-AS1
ENSG00000196917	6.36343	1.4512	0.555373	2.61302	0.00897449	0.0562669	HCAR1
ENSG00000270074	11.7191	1.45072	0.537787	2.69757	0.00698471	0.0471105
ENSG00000180875	10.4958	1.44426	0.487211	2.96434	0.00303331	0.0268753	GREM2
ENSG00000204790	23.3724	1.43869	0.412779	3.48536	0.000491469	0.00799903
ENSG00000146674	8.7595	1.43578	0.712058	2.01638	0.0437602	0.165819	IGFBP3
ENSG00000213221	15.0502	1.42488	0.299701	4.75433	1.99103e-06	0.000165793	DNLZ
ENSG00000235659	7.40988	1.417	0.577389	2.45415	0.0141218	0.0768635
ENSG00000211611	24.0475	1.41586	0.452927	3.12603	0.00177184	0.0187737	IGKV6-21
ENSG00000211946	138.139	1.39566	0.21072	6.62329	3.51294e-11	5.8748e-08	IGHV3-20
ENSG00000237604	62.4831	1.39547	0.307735	4.53464	5.7701e-06	0.00037353
ENSG00000178055	5.74918	1.36583	0.567142	2.40826	0.0160289	0.0840081	PRSS42
ENSG00000156234	334.722	1.35877	0.4268	3.18363	0.00145442	0.016425	CXCL13
ENSG00000215146	18.7155	1.35645	0.474186	2.86059	0.00422859	0.0335481
ENSG00000273654	41.2469	1.3508	0.448691	3.01054	0.00260781	0.0242731
ENSG00000211930	10.3313	1.34816	0.44732	3.01386	0.0025795	0.0241015	IGHD3-3
ENSG00000128268	110.141	1.33007	0.261598	5.08439	3.68809e-07	5.10432e-05	MGAT3
ENSG00000223416	177.144	1.32393	0.410637	3.22408	0.00126378	0.0148901	RPS26P15
ENSG00000118194	33.527	1.31617	0.326664	4.02912	5.59856e-05	0.00177491	TNNT2
ENSG00000277150	266.253	1.31147	0.49933	2.62645	0.00862805	0.0547243	F8A3
ENSG00000138685	27.9577	1.30965	0.58494	2.23895	0.0251594	0.1145	FGF2
ENSG00000279254	9.44734	1.30596	0.430829	3.03127	0.00243523	0.0231121
ENSG00000267605	10.6706	1.29968	0.617064	2.10623	0.0351841	0.143633
ENSG00000179899	405.694	1.29317	0.616801	2.09659	0.0360303	0.145809	PHC1P1
ENSG00000279693	5.99136	1.28816	0.506177	2.54488	0.0109316	0.064503
ENSG00000277561	75.6653	1.28666	0.583846	2.20376	0.0275411	0.121685	GOLGA8IP
ENSG00000039068	113.704	1.28365	0.340154	3.77372	0.000160829	0.00365104	CDH1
ENSG00000213853	21.0022	1.28157	0.530625	2.4152	0.0157264	0.0831833	EMP2
ENSG00000110328	7.23314	1.28147	0.577498	2.219	0.0264865	0.11846	GALNT18
ENSG00000162620	28.1927	1.27513	0.336678	3.7874	0.000152235	0.00353594	LRRIQ3
ENSG00000167748	24.9064	1.26998	0.452479	2.80672	0.00500486	0.0376932	KLK1
ENSG00000168502	59.7703	1.26857	0.303199	4.18397	2.86465e-05	0.00110908	MTCL1
ENSG00000174944	145.694	1.26548	0.30992	4.08325	4.44102e-05	0.00152607	P2RY14
ENSG00000118432	69.8286	1.26405	0.24293	5.20337	1.95709e-07	3.21925e-05	CNR1
ENSG00000254287	11.0106	1.25242	0.50207	2.49451	0.0126132	0.0712018
ENSG00000211972	29.3975	1.24894	0.511756	2.4405	0.014667	0.0789317	IGHV3-66
ENSG00000211965	141.41	1.23033	0.28607	4.3008	1.7018e-05	0.000782479	IGHV3-49
ENSG00000211666	535.649	1.22884	0.185309	6.63129	3.32764e-11	5.8748e-08	IGLV2-14
ENSG00000254399	16.0137	1.22819	0.383556	3.20213	0.00136418	0.0157335	GLYATL1P4
ENSG00000270154	11.5248	1.21693	0.377591	3.22288	0.00126907	0.0149283
ENSG00000112276	8.44272	1.20584	0.404985	2.97749	0.00290616	0.0260949	BVES
ENSG00000211942	44.3397	1.20061	0.482825	2.48663	0.0128961	0.0723307	IGHV3-13
ENSG00000144488	12.6704	1.19817	0.455128	2.63261	0.00847311	0.0540491	ESPNL
ENSG00000222037	20.4021	1.19232	0.344557	3.46046	0.000539262	0.00849443	IGLC6
ENSG00000235621	93.8639	1.19049	0.186601	6.3799	1.77207e-10	2.09188e-07	LINC00494
ENSG00000213025	46.1353	1.18673	0.33436	3.54926	0.000386311	0.00677667	COX20P1
ENSG00000235459	20.0255	1.18479	0.496679	2.38542	0.0170594	0.0876917	RPS26P31
ENSG00000272799	8.96527	1.18317	0.375558	3.15043	0.0016303	0.0176371
ENSG00000130182	6.16824	1.18297	0.512106	2.31001	0.0208878	0.100739	ZSCAN10
ENSG00000152785	9.4169	1.17323	0.359508	3.26342	0.00110076	0.0136133	BMP3
ENSG00000233198	6.83399	1.16502	0.432502	2.69367	0.00706711	0.0474641	RNF224
ENSG00000135373	64.0003	1.16221	0.337163	3.44703	0.000566782	0.00875435	EHF
ENSG00000092758	180.989	1.16106	0.344972	3.36568	0.000763546	0.0105566	COL9A3
ENSG00000128917	167.752	1.15199	0.535945	2.14945	0.031599	0.133642	DLL4
ENSG00000211639	52.8263	1.15067	0.494233	2.32818	0.0199023	0.0975114	IGLV4-60
ENSG00000228050	77.28	1.14111	0.402309	2.8364	0.00456254	0.0353791	TOP3BP1
ENSG00000225544	18.8414	1.13949	0.327292	3.48158	0.000498463	0.00806056
ENSG00000235304	7.88836	1.1381	0.504464	2.25605	0.0240674	0.111011	LINC01281
ENSG00000261097	12.7099	1.13546	0.335934	3.38002	0.000724815	0.010168	LINC00563
ENSG00000138772	12.3347	1.13019	0.525659	2.15004	0.0315522	0.133528	ANXA3
ENSG00000211959	327.336	1.12461	0.255666	4.39875	1.08876e-05	0.000569587	IGHV4-39
ENSG00000277998	7.85906	1.12229	0.398126	2.81893	0.00481844	0.0366274
ENSG00000104368	61.2991	1.12167	0.32994	3.39961	0.000674821	0.00974969	PLAT
ENSG00000136848	20.2623	1.12141	0.497648	2.25341	0.0242332	0.111514	DAB2IP
ENSG00000204428	49.817	1.11862	0.215635	5.18757	2.1306e-07	3.39341e-05	LY6G5C
ENSG00000241134	5.94048	1.11595	0.403344	2.76674	0.00566197	0.0410196	BET1P1
ENSG00000188626	130.352	1.11511	0.210012	5.30976	1.09768e-07	2.15964e-05	GOLGA8M
ENSG00000260081	16.0088	1.11108	0.419951	2.64574	0.00815123	0.0526994
ENSG00000255151	67.6283	1.1103	0.266715	4.16288	3.14253e-05	0.0011938	GLYATL1B
ENSG00000232216	57.6492	1.10811	0.369005	3.00296	0.00267368	0.0247716	IGHV3-43
ENSG00000165895	41.2629	1.10693	0.225109	4.91729	8.77499e-07	9.36684e-05	ARHGAP42
ENSG00000169116	22.9969	1.1052	0.311401	3.54914	0.000386496	0.00677667	PARM1
ENSG00000143184	106.155	1.09997	0.255841	4.29942	1.71249e-05	0.000782829	XCL1
ENSG00000267452	9.73949	1.09784	0.438646	2.5028	0.0123215	0.0697907	LINC02073
ENSG00000154856	23.8788	1.09272	0.465089	2.34949	0.018799	0.0937521	APCDD1
ENSG00000236170	6.24501	1.09223	0.488524	2.23578	0.0253663	0.11504	IGHD1-1
ENSG00000274011	20.9541	1.09185	0.337724	3.23297	0.00122512	0.0145996
ENSG00000211941	176.95	1.09124	0.225107	4.84764	1.24938e-06	0.000122905	IGHV3-11
ENSG00000229989	6.35282	1.08758	0.408516	2.66227	0.00776161	0.0509686	MIR181A1HG
ENSG00000237161	19.7175	1.08655	0.325345	3.33968	0.00083875	0.0112109
ENSG00000109272	46.0868	1.08126	0.474604	2.27823	0.0227131	0.106572	PF4V1
ENSG00000261488	16.1641	1.07958	0.25957	4.15912	3.1948e-05	0.00120741	TBILA
ENSG00000146530	9.65381	1.0782	0.536706	2.00893	0.0445448	0.167621	VWDE
ENSG00000168993	16.0343	1.07608	0.243617	4.41709	1.00038e-05	0.000535049	CPLX1
ENSG00000203327	8.13029	1.07221	0.388443	2.76028	0.00577515	0.0415997
ENSG00000253234	10.0074	1.06852	0.391768	2.72743	0.00638303	0.0445237	IGLV2-5
ENSG00000107719	77.5078	1.06843	0.250989	4.25686	2.07314e-05	0.000890873	PALD1
ENSG00000262370	125.952	1.06681	0.281621	3.78808	0.000151814	0.00353025
ENSG00000275799	28.5189	1.06162	0.279135	3.80326	0.000142803	0.00337791
ENSG00000243466	395.841	1.06081	0.169201	6.26949	3.62231e-10	3.63463e-07	IGKV1-5
ENSG00000238062	25.2535	1.06076	0.396585	2.67473	0.00747904	0.0495018	SPATA3-AS1
ENSG00000226599	7.35687	1.06027	0.471072	2.25076	0.0244005	0.112207
ENSG00000258357	6.56271	1.05869	0.362782	2.91825	0.00352007	0.029564
ENSG00000123843	21.4857	1.05501	0.414482	2.54538	0.010916	0.0644872	C4BPB
ENSG00000224220	7.42503	1.05147	0.373532	2.81495	0.00487843	0.0370274
ENSG00000091428	25.8108	1.04929	0.288169	3.64124	0.00027133	0.00532785	RAPGEF4
ENSG00000265929	23.3752	1.04916	0.248564	4.2209	2.43331e-05	0.0010027	MIR5195
ENSG00000151320	14.2067	1.0422	0.268906	3.87572	0.000106308	0.00276944	AKAP6
ENSG00000162526	10.1762	1.03875	0.286544	3.6251	0.000288847	0.005579	TSSK3
ENSG00000264270	5.86764	1.03682	0.482567	2.14854	0.0316706	0.133826
ENSG00000250334	24.8645	1.03576	0.360707	2.87146	0.0040858	0.0327776	LINC00989
ENSG00000278175	36.6825	1.0357	0.268929	3.85121	0.000117538	0.00297238	GLIDR
ENSG00000211966	407.22	1.0341	0.221781	4.66273	3.12048e-06	0.000238966	IGHV5-51
ENSG00000272746	10.2649	1.03359	0.32496	3.18068	0.00146932	0.0165036
ENSG00000242265	237.691	1.03107	0.261798	3.93841	8.20247e-05	0.00232496	PEG10
ENSG00000187510	21.0714	1.03053	0.373173	2.76154	0.00575301	0.0415172	PLEKHG7
ENSG00000158089	20.0617	1.02644	0.332864	3.08366	0.00204469	0.0206507	GALNT14
ENSG00000142583	539.879	1.02565	0.267371	3.83605	0.000125029	0.00309498	SLC2A5
ENSG00000275426	13.0045	1.02078	0.30614	3.33436	0.000854957	0.0113249
ENSG00000124613	51.4938	1.01965	0.38219	2.66791	0.00763249	0.0503183	ZNF391
ENSG00000189221	124.353	1.01687	0.362434	2.80565	0.00502148	0.0377137	MAOA
ENSG00000275601	25.9574	1.01388	0.48571	2.08741	0.036851	0.148084
ENSG00000220161	9.18298	1.01246	0.389315	2.60062	0.00930546	0.0576774	LINC02076
ENSG00000211598	464.15	1.01153	0.223534	4.5252	6.03379e-06	0.000380774	IGKV4-1
ENSG00000211685	40.1177	1.00786	0.420182	2.39862	0.0164569	0.0855079	IGLC7
ENSG00000151632	46.6438	1.00731	0.386582	2.6057	0.00916877	0.0572098	AKR1C2
ENSG00000163687	20.0873	1.00691	0.429487	2.34445	0.0190552	0.0946205	DNASE1L3
ENSG00000148346	11.4469	1.00538	0.326938	3.07515	0.00210399	0.0210378	LCN2
ENSG00000242580	10.0351	1.00401	0.514707	1.95065	0.0510993	0.18412	IGKV1D-43
ENSG00000121318	6.56767	1.00062	0.371419	2.69404	0.00705916	0.04744	TAS2R10
ENSG00000132465	1777.05	0.999682	0.167626	5.96378	2.46469e-09	1.59553e-06	JCHAIN
ENSG00000234261	16.5886	0.999351	0.352793	2.83268	0.00461595	0.0356144
ENSG00000270281	7.54256	0.998518	0.449085	2.22345	0.0261856	0.117429
ENSG00000141837	107.254	0.998355	0.322686	3.09389	0.00197551	0.0201241	CACNA1A
ENSG00000267053	14.9501	0.994785	0.519146	1.91619	0.0553403	0.194359
ENSG00000162817	56.8339	0.990886	0.33134	2.99054	0.0027848	0.0254696	C1orf115
ENSG00000211943	274.905	0.990868	0.219686	4.51039	6.47097e-06	0.000399567	IGHV3-15
ENSG00000187922	5.91562	0.99027	0.479667	2.0645	0.0389707	0.15339	LCN10
ENSG00000273000	6.56787	0.986204	0.445298	2.21471	0.0267803	0.119428
ENSG00000283337	8.07082	0.981502	0.366628	2.67711	0.00742605	0.0492648
ENSG00000272677	7.10387	0.980407	0.36527	2.68406	0.00727334	0.0485083
ENSG00000226233	10.4758	0.980199	0.479795	2.04295	0.0410569	0.158964
ENSG00000233922	6.82583	0.978331	0.438381	2.23169	0.0256353	0.115789	LINC01694
ENSG00000253816	37.7846	0.974912	0.308096	3.16431	0.00155453	0.0170565
ENSG00000255733	39.1007	0.974718	0.349688	2.78739	0.00531339	0.0392307	IFNG-AS1
ENSG00000265474	7.43004	0.971146	0.383717	2.53089	0.0113774	0.0662185
ENSG00000276644	74.5812	0.969812	0.173088	5.603	2.10669e-08	7.8136e-06	DACH1
ENSG00000270885	8.94524	0.96843	0.356484	2.71661	0.00659536	0.045405	RASL10B
ENSG00000197859	20.2126	0.965295	0.359427	2.68565	0.00723895	0.0483271	ADAMTSL2
ENSG00000211976	68.034	0.965032	0.316412	3.04993	0.00228898	0.0221588	IGHV3-73
ENSG00000187987	12.6573	0.962196	0.351071	2.74075	0.00612999	0.0432853	ZSCAN23
ENSG00000177494	166.54	0.961483	0.262567	3.66185	0.000250399	0.00502693	ZBED2
ENSG00000230358	23.2156	0.959529	0.363623	2.6388	0.00831993	0.0534628	SPDYE21P
ENSG00000198106	137.155	0.958338	0.223303	4.29165	1.77353e-05	0.000801605
ENSG00000221887	13.6982	0.957111	0.387843	2.46778	0.0135954	0.0749539	HMSD
ENSG00000183960	10.3468	0.954875	0.431237	2.21427	0.02681	0.119534	KCNH8
ENSG00000117013	26.6185	0.949634	0.345056	2.75212	0.00592113	0.0422415	KCNQ4
ENSG00000267412	10.761	0.9461	0.359214	2.63381	0.00844331	0.0538761
ENSG00000166736	26.3663	0.942945	0.377975	2.49473	0.0126055	0.0711779	HTR3A
ENSG00000139899	474.479	0.941027	0.172261	5.46279	4.68696e-08	1.19383e-05	CBLN3
ENSG00000271699	9.51896	0.940234	0.32946	2.85386	0.00431913	0.0340843	SNX29P2
ENSG00000168334	17.1455	0.938274	0.425719	2.20397	0.0275262	0.121685	XIRP1
ENSG00000240382	74.5579	0.937752	0.362448	2.58727	0.00967396	0.0592242	IGKV1-17
ENSG00000211651	356.164	0.933187	0.24931	3.74308	0.000181775	0.00401305	IGLV1-44
ENSG00000169946	12.2192	0.932633	0.482894	1.93134	0.0534407	0.190324	ZFPM2
ENSG00000237301	16.7395	0.931981	0.25954	3.59089	0.000329547	0.00610332
ENSG00000160284	75.5998	0.931343	0.406841	2.28921	0.0220673	0.104543	SPATC1L
ENSG00000203288	7.33265	0.9302	0.367514	2.53106	0.0113719	0.0662055	TDRKH-AS1
ENSG00000244437	402.668	0.92908	0.247733	3.75032	0.000176607	0.00392052	IGKV3-15
ENSG00000253893	32.174	0.926084	0.232866	3.9769	6.98185e-05	0.0020635	FAM85B
ENSG00000233690	6.25373	0.925935	0.426468	2.17117	0.0299181	0.128813	EBAG9P1
ENSG00000137731	27.5464	0.923409	0.256659	3.59781	0.000320905	0.00599706	FXYD2
ENSG00000271161	6.88262	0.920849	0.360261	2.55606	0.0105864	0.0632287	BOLA2P2
ENSG00000241577	6.66318	0.920834	0.389277	2.3655	0.0180059	0.0910012
ENSG00000178445	36.0713	0.919096	0.274029	3.35401	0.000796501	0.0108367	GLDC
ENSG00000239951	690.49	0.91882	0.143268	6.41331	1.42389e-10	1.86274e-07	IGKV3-20
ENSG00000211947	390.853	0.916896	0.168928	5.42774	5.70714e-08	1.33175e-05	IGHV3-21
ENSG00000267277	6.93317	0.916509	0.40233	2.278	0.0227265	0.106609
ENSG00000273062	12.083	0.910672	0.335104	2.71758	0.00657614	0.0453193
ENSG00000211978	59.0663	0.910481	0.191186	4.76228	1.91417e-06	0.000160726	IGHV5-78
ENSG00000143850	11.9476	0.910106	0.395142	2.30324	0.0212655	0.102168	PLEKHA6
ENSG00000274383	13.7542	0.907201	0.385205	2.35511	0.0185171	0.0927611
ENSG00000186235	38.3708	0.904535	0.214066	4.22549	2.38417e-05	0.000990591	LINC02610
ENSG00000231728	13.3775	0.903105	0.303179	2.97879	0.00289392	0.026031	TMSB15B-AS1
ENSG00000248923	37.3831	0.902568	0.27123	3.32768	0.000875715	0.0114712	MTND5P11
ENSG00000267383	16.3942	0.900095	0.398169	2.26058	0.0237851	0.110083
ENSG00000158481	90.0028	0.898317	0.315277	2.8493	0.00438158	0.0344687	CD1C
ENSG00000228906	12.6285	0.896886	0.311285	2.88124	0.00396117	0.0321053
ENSG00000150681	180.404	0.896619	0.255368	3.51109	0.000446275	0.0074839	RGS18
ENSG00000112232	14.1218	0.89562	0.402213	2.22673	0.0259653	0.116721	KHDRBS2
ENSG00000281550	9.58794	0.895007	0.463414	1.93133	0.0534421	0.190324
ENSG00000214872	189.064	0.891689	0.268834	3.31688	0.0009103	0.011763	SMTNL1
ENSG00000124772	225.651	0.891667	0.237869	3.74856	0.000177854	0.00394384	CPNE5
ENSG00000233845	10.2961	0.891623	0.361022	2.46972	0.0135219	0.0746847
ENSG00000240057	29.4826	0.889915	0.192765	4.61657	3.9013e-06	0.000275673
ENSG00000251584	15.1013	0.889553	0.438191	2.03006	0.0423506	0.162069
ENSG00000262454	13.9469	0.887054	0.311782	2.84511	0.00443965	0.0347891	MIR193BHG
ENSG00000104953	8.0615	0.886742	0.398166	2.22707	0.0259427	0.116678	TLE6
ENSG00000211962	142.716	0.885363	0.155732	5.68518	1.30678e-08	5.57969e-06	IGHV1-46
ENSG00000117322	625.698	0.883347	0.137634	6.41811	1.37981e-10	1.86274e-07	CR2
ENSG00000258521	19.4175	0.883031	0.401879	2.19726	0.0280022	0.12318
ENSG00000241679	13.2547	0.880101	0.299098	2.94252	0.00325552	0.028136
ENSG00000106537	426.731	0.879778	0.216337	4.0667	4.76833e-05	0.00160555	TSPAN13
ENSG00000255760	50.7295	0.879712	0.214518	4.10089	4.11573e-05	0.00143899	LINC02422
ENSG00000106113	8.79501	0.878583	0.413424	2.12514	0.0335753	0.13927	CRHR2
ENSG00000215475	83.7902	0.878002	0.246278	3.56508	0.000363745	0.00647704	SIAH3
ENSG00000283317	11.5743	0.87491	0.337282	2.594	0.00948666	0.0585239
ENSG00000099834	18.2435	0.872906	0.291235	2.99726	0.00272421	0.0250778	CDHR5
ENSG00000173404	51.2634	0.872571	0.406014	2.14912	0.0316251	0.133667	INSM1
ENSG00000205832	18.2568	0.870972	0.287165	3.033	0.00242134	0.0230401	C16orf96
ENSG00000103742	12.7333	0.8705	0.384774	2.26237	0.0236748	0.109757	IGDCC4
ENSG00000177455	1605.84	0.869643	0.192911	4.508	6.54408e-06	0.000400386	CD19
ENSG00000255189	14.757	0.869098	0.404597	2.14806	0.0317089	0.133826	GLYATL1P1
ENSG00000239961	35.2987	0.866497	0.254965	3.3985	0.000677576	0.00978244	LILRA4
ENSG00000231707	10.1292	0.865282	0.304056	2.8458	0.00443004	0.0347545	PABPC1P1
ENSG00000116194	11.1022	0.863354	0.331401	2.60517	0.00918294	0.0572486	ANGPTL1
ENSG00000178538	15.3389	0.861834	0.3045	2.83032	0.00465008	0.0357403	CA8
ENSG00000147642	5.95948	0.86168	0.447868	1.92396	0.0543598	0.192386	SYBU
ENSG00000198947	517.227	0.858931	0.148961	5.76613	8.11128e-09	3.78551e-06	DMD
ENSG00000115138	58.1333	0.858474	0.244089	3.51705	0.000436371	0.00737751	POMC
ENSG00000145506	43.7768	0.85289	0.366406	2.32772	0.0199268	0.097606	NKD2
ENSG00000171451	9.00846	0.851381	0.43979	1.93588	0.0528824	0.188906	DSEL
ENSG00000211662	344.092	0.850706	0.281805	3.01878	0.00253798	0.0238112	IGLV3-21
ENSG00000211668	226.91	0.850078	0.267158	3.18193	0.00146296	0.0164845	IGLV2-11
ENSG00000134121	11.9356	0.849916	0.419251	2.02723	0.0426393	0.162831	CHL1
ENSG00000211973	355.178	0.848294	0.270373	3.13749	0.001704	0.0182131	IGHV1-69
ENSG00000100721	1333.12	0.846979	0.176524	4.7981	1.60178e-06	0.000146779	TCL1A
ENSG00000254709	43.6855	0.846572	0.252757	3.34935	0.000810026	0.0109909	IGLL5
ENSG00000198569	9.92413	0.844542	0.338246	2.49683	0.0125308	0.0708363	SLC34A3
ENSG00000270392	153.959	0.843438	0.213571	3.94921	7.84095e-05	0.0022511	PFN1P2
ENSG00000215241	9.92295	0.837264	0.421842	1.98478	0.0471688	0.174333	LINC02449
ENSG00000261360	10.6529	0.836955	0.298294	2.80581	0.00501906	0.0377137
ENSG00000259442	19.776	0.836104	0.234242	3.56941	0.000357791	0.00639559
ENSG00000251455	5.99129	0.836074	0.381994	2.18871	0.0286178	0.124848
ENSG00000232869	167.594	0.835773	0.184764	4.52346	6.08365e-06	0.000382055	TRBV29-1
ENSG00000163518	92.6495	0.835235	0.37286	2.24008	0.0250858	0.114293	FCRL4
ENSG00000261302	11.7469	0.834957	0.338988	2.46309	0.0137746	0.0756134
ENSG00000183971	24.6314	0.834496	0.314157	2.6563	0.00790028	0.0515669	NPW
ENSG00000182240	31.4555	0.832039	0.296989	2.80159	0.00508522	0.0380642	BACE2
ENSG00000078900	7.05259	0.831438	0.407076	2.04247	0.0411053	0.159028	TP73
ENSG00000225756	403.903	0.828359	0.189984	4.36014	1.29978e-05	0.000639287	DBH-AS1
ENSG00000112414	12.8859	0.82734	0.380731	2.17303	0.0297781	0.128529	ADGRG6
ENSG00000159166	267.231	0.827286	0.226328	3.65526	0.000256926	0.00511468	LAD1
ENSG00000146453	21.502	0.826547	0.366741	2.25376	0.0242111	0.111463	PNLDC1
ENSG00000151023	17.6745	0.826327	0.34139	2.42048	0.0155001	0.0824209	ENKUR
ENSG00000262461	15.1295	0.826148	0.387473	2.13214	0.0329951	0.13756	SPDYE9P
ENSG00000261218	25.6229	0.824922	0.277688	2.97068	0.00297145	0.0265262
ENSG00000197980	10.2915	0.824352	0.359653	2.29207	0.0219014	0.104028	LEKR1
ENSG00000234965	18.3604	0.822849	0.32671	2.51859	0.0117824	0.0677507	SHISA8
ENSG00000259479	66.243	0.821264	0.338343	2.42731	0.0152112	0.081164	SORD2P
ENSG00000270972	13.7143	0.819838	0.357495	2.29329	0.0218314	0.103794
ENSG00000150773	6.03239	0.81834	0.408199	2.00476	0.0449888	0.168754	PIH1D2
ENSG00000170486	198.756	0.817093	0.185915	4.39499	1.10777e-05	0.000571483	KRT72
ENSG00000164659	152.832	0.816747	0.379611	2.15154	0.0314339	0.133236	KIAA1324L
ENSG00000236946	12.9387	0.81611	0.33357	2.44659	0.0144213	0.0780072	HNRNPA1P70
ENSG00000229106	37.7774	0.815432	0.201176	4.05333	5.04936e-05	0.00166937	BTBD6P1
ENSG00000123454	190.674	0.814941	0.187089	4.35589	1.32527e-05	0.00064396	DBH
ENSG00000228415	6.78836	0.813739	0.41084	1.98067	0.047628	0.175376	PTMAP1
ENSG00000277265	7.23664	0.810911	0.369923	2.19211	0.0283719	0.124099	RN7SL556P
ENSG00000007384	21.8404	0.808589	0.310507	2.60409	0.00921177	0.0573215	RHBDF1
ENSG00000231160	217.414	0.808512	0.157322	5.13923	2.75869e-07	4.16251e-05	KLF3-AS1
ENSG00000165716	76.5179	0.806486	0.160051	5.03894	4.68112e-07	5.94561e-05	DIPK1B
ENSG00000223350	55.9835	0.804841	0.318628	2.52596	0.0115383	0.066787	IGLV9-49
ENSG00000267368	15.8061	0.800785	0.392518	2.04012	0.0413379	0.159594	UPK3BL1
ENSG00000260022	30.7066	0.799467	0.17486	4.57205	4.82978e-06	0.000322007
ENSG00000275393	43.5366	0.798792	0.234937	3.40002	0.000673815	0.00974216
ENSG00000153064	2407.76	0.797484	0.182925	4.35962	1.30291e-05	0.000639287	BANK1
ENSG00000260844	28.4044	0.79702	0.219406	3.63263	0.000280543	0.00546546
ENSG00000211949	738.041	0.794701	0.227928	3.48663	0.00048914	0.00798054	IGHV3-23
ENSG00000233250	6.12361	0.791326	0.353007	2.24167	0.0249826	0.114073
ENSG00000260287	412.703	0.790362	0.405609	1.94858	0.0513454	0.184692	TBC1D3G
ENSG00000121743	70.0546	0.790249	0.390755	2.02236	0.0431389	0.164146	GJA3
ENSG00000158473	34.4343	0.790188	0.348627	2.26657	0.0234164	0.108904	CD1D
ENSG00000200714	7.13589	0.78997	0.382575	2.06488	0.0389346	0.153354
ENSG00000259096	6.51949	0.788568	0.390819	2.01773	0.0436193	0.165442	SHLD2P2
ENSG00000211890	954.147	0.787134	0.24704	3.18626	0.00144125	0.0163222	IGHA2
ENSG00000084710	43.2355	0.786748	0.275021	2.86068	0.00422733	0.0335481	EFR3B
ENSG00000158482	142.693	0.786594	0.272127	2.89054	0.0038458	0.0314881	SNX29P1
ENSG00000272221	60.6481	0.786455	0.410591	1.91542	0.0554385	0.194417
ENSG00000255566	8.32978	0.786124	0.308737	2.54626	0.0108883	0.0643605
ENSG00000253955	9.51043	0.785403	0.351752	2.23283	0.02556	0.115631
ENSG00000238025	18.1687	0.783864	0.39555	1.98171	0.0475121	0.17511	ZDHHC4P1
ENSG00000128438	685.152	0.782281	0.254009	3.07974	0.00207182	0.0208095	TBC1D27P
ENSG00000266946	11.2675	0.781888	0.305505	2.55933	0.0104875	0.0628623	MRPL37P1
ENSG00000272755	47.0008	0.781638	0.216529	3.60986	0.000306365	0.00583869
ENSG00000228590	28.7209	0.779644	0.264995	2.94211	0.00325988	0.0281494
ENSG00000175643	232.252	0.779423	0.157189	4.95849	7.10428e-07	7.96473e-05	RMI2
ENSG00000263412	14.2505	0.779355	0.30251	2.5763	0.00998653	0.0607396
ENSG00000225632	10.0286	0.778851	0.295326	2.63726	0.00835799	0.0536409
ENSG00000112053	9.54881	0.777566	0.365919	2.12497	0.0335894	0.1393	SLC26A8
ENSG00000133424	50.312	0.777208	0.225518	3.44632	0.000568269	0.00875435	LARGE1
ENSG00000211593	46.5465	0.776173	0.232217	3.34245	0.000830424	0.0111546	IGKJ5
ENSG00000128218	66.2093	0.776021	0.260021	2.98446	0.00284083	0.0257538	VPREB3
ENSG00000274419	478.342	0.775293	0.357384	2.16935	0.0300558	0.129267	TBC1D3D
ENSG00000213383	6.0501	0.77471	0.385324	2.01054	0.0443741	0.167181
ENSG00000227001	24.3974	0.77469	0.405018	1.91273	0.0557828	0.195264	NBPF2P
ENSG00000267340	8.86102	0.774606	0.371381	2.08574	0.0370019	0.148392
ENSG00000171551	26.7694	0.772795	0.344183	2.2453	0.0247487	0.113347	ECEL1
ENSG00000182472	75.3177	0.771076	0.227323	3.39198	0.000693888	0.00988988	CAPN12
ENSG00000160683	139.438	0.770867	0.196053	3.93194	8.42646e-05	0.00235191	CXCR5
ENSG00000163069	108.021	0.770562	0.175783	4.38361	1.1673e-05	0.000592288	SGCB
ENSG00000121089	47.2386	0.770196	0.164677	4.677	2.91098e-06	0.00022757	NACA3P
ENSG00000081052	25.8801	0.768597	0.261229	2.94223	0.00325855	0.0281494	COL4A4
ENSG00000103647	61.1978	0.76813	0.375504	2.0456	0.0407958	0.15814	CORO2B
ENSG00000228835	15.1175	0.767175	0.356255	2.15344	0.031284	0.132869
ENSG00000099958	29.4165	0.766869	0.227391	3.37247	0.000744972	0.0103859	DERL3
ENSG00000187621	187.313	0.765403	0.255787	2.99235	0.00276839	0.0253565	TCL6
ENSG00000271228	7.14538	0.763833	0.372049	2.05304	0.0400684	0.156286
ENSG00000211899	34711.1	0.76377	0.112734	6.775	1.2441e-11	2.77407e-08	IGHM
ENSG00000250602	7.42694	0.763732	0.384063	1.98856	0.0467497	0.173348
ENSG00000112761	6.75537	0.762912	0.388724	1.9626	0.0496922	0.180755	WISP3
ENSG00000230138	25.447	0.762378	0.210203	3.62686	0.000286886	0.00555181
ENSG00000189410	9.69674	0.760324	0.357675	2.12574	0.0335246	0.139143	SH2D5
ENSG00000214973	12.0968	0.760304	0.286232	2.65625	0.00790155	0.0515669	CHCHD3P3
ENSG00000275976	19.3228	0.760132	0.258192	2.94406	0.00323942	0.0280737	SPDYE11
ENSG00000132704	628.524	0.759228	0.227051	3.34387	0.000826183	0.0111164	FCRL2
ENSG00000152056	127.553	0.759167	0.146056	5.19776	2.01704e-07	3.26436e-05	AP1S3
ENSG00000088280	19.8407	0.758252	0.248133	3.05583	0.00224442	0.0218965	ASAP3
ENSG00000250850	13.6972	0.757643	0.387364	1.95589	0.0504779	0.182554
ENSG00000267702	54.2844	0.757159	0.174158	4.34754	1.37674e-05	0.000659389
ENSG00000187134	314.434	0.756759	0.252391	2.99836	0.00271441	0.0250219	AKR1C1
ENSG00000162337	266.786	0.756701	0.19072	3.9676	7.25999e-05	0.00212072	LRP5
ENSG00000131401	1003.67	0.755257	0.230239	3.28032	0.00103689	0.0130202	NAPSB
ENSG00000170476	447.264	0.755162	0.142901	5.28453	1.26027e-07	2.27848e-05	MZB1
ENSG00000117519	154.992	0.754567	0.16732	4.50973	6.49104e-06	0.000399577	CNN3
ENSG00000006282	290.137	0.754502	0.231655	3.25701	0.00112593	0.0138112	SPATA20
ENSG00000241061	50.7605	0.754367	0.279524	2.69875	0.00695996	0.0470276	RPL5P1
ENSG00000256862	68.4174	0.752931	0.266986	2.82011	0.00480075	0.0365322
ENSG00000169738	579.696	0.751662	0.143679	5.23153	1.68115e-07	2.88353e-05	DCXR
ENSG00000261499	407.266	0.750327	0.360492	2.0814	0.0373976	0.149233
ENSG00000267203	16.11	0.75016	0.295031	2.54265	0.0110015	0.0647824	SNRPGP4
ENSG00000255237	6.8136	0.749704	0.331812	2.25943	0.0238568	0.110313
ENSG00000267724	14.8094	0.744587	0.279237	2.6665	0.00766446	0.0504627
ENSG00000267414	21.0499	0.744391	0.249084	2.98852	0.00280337	0.0255602
ENSG00000234345	12.4143	0.742808	0.301617	2.46276	0.0137874	0.0756134
ENSG00000255495	54.8137	0.741938	0.277348	2.67511	0.00747044	0.0495018
ENSG00000184305	69.0929	0.740518	0.276857	2.67473	0.00747892	0.0495018	CCSER1
ENSG00000185040	90.6908	0.739524	0.295361	2.50379	0.012287	0.0696736	SPDYE16
ENSG00000215030	991.199	0.738974	0.300422	2.45978	0.0139021	0.0760389	RPL13P12
ENSG00000228653	8.67022	0.737241	0.380874	1.93566	0.0529095	0.18893	HNRNPCP7
ENSG00000205236	56.2176	0.736647	0.17767	4.14616	3.38104e-05	0.00125496
ENSG00000226777	1363.13	0.736152	0.166837	4.41239	1.02236e-05	0.000541337	FAM30A
ENSG00000211937	190.364	0.735797	0.188738	3.8985	9.67905e-05	0.00261425	IGHV2-5
ENSG00000265612	138.196	0.735509	0.219769	3.34674	0.00081768	0.0110438	MIR4539
ENSG00000215187	9.03794	0.735057	0.368176	1.99648	0.0458815	0.171398	FAM166B
ENSG00000279410	7.75045	0.734032	0.372238	1.97194	0.0486161	0.17771
ENSG00000211597	27.3307	0.732444	0.231514	3.16371	0.00155772	0.0170759	IGKJ1
ENSG00000285219	10.8626	0.732252	0.374832	1.95355	0.0507544	0.183191
ENSG00000135338	10.6747	0.731377	0.361925	2.0208	0.0433009	0.164576	LCA5
ENSG00000283312	10.126	0.73095	0.336414	2.17277	0.0297977	0.128533
ENSG00000244116	207.417	0.730633	0.307068	2.37939	0.0173415	0.0887251	IGKV2-28
ENSG00000276529	18.2059	0.729934	0.24467	2.98334	0.00285124	0.0257974
ENSG00000163453	41.2605	0.728886	0.294276	2.47688	0.0132536	0.0735904	IGFBP7
ENSG00000171084	18.9486	0.728554	0.284843	2.55774	0.0105356	0.0630378	FAM86JP
ENSG00000168811	25.0835	0.728251	0.334295	2.17847	0.0293713	0.127305	IL12A
ENSG00000269924	6.9853	0.727537	0.367443	1.98	0.0477037	0.175526
ENSG00000163430	37.7756	0.726179	0.249136	2.91479	0.00355929	0.0297616	FSTL1
ENSG00000204277	18.155	0.725648	0.342892	2.11626	0.034323	0.141235	LINC01993
ENSG00000171766	85.0924	0.724516	0.255887	2.83139	0.00463466	0.0356627	GATM
ENSG00000178222	43.1311	0.724039	0.291786	2.48141	0.0130864	0.0730508	RNF212
ENSG00000157470	17.3712	0.723611	0.304758	2.37438	0.0175783	0.0894996	FAM81A
ENSG00000211677	1766.71	0.72285	0.221515	3.26321	0.0011016	0.0136133	IGLC2
ENSG00000242258	438.694	0.722446	0.235331	3.06991	0.00214121	0.0212592	LINC00996
ENSG00000285639	9.45506	0.722026	0.371338	1.94439	0.0518487	0.186003
ENSG00000241529	7.89502	0.720964	0.331833	2.17267	0.0298051	0.128533	RN7SL767P
ENSG00000005513	74.0522	0.72094	0.206331	3.49409	0.000475677	0.00783305	SOX8
ENSG00000249318	10.4938	0.720599	0.32662	2.20623	0.0273681	0.121134
ENSG00000211970	176.716	0.719213	0.216805	3.31733	0.000908822	0.0117545	IGHV4-61
ENSG00000224861	159.993	0.718644	0.26836	2.67791	0.0074082	0.0491952	YBX1P1
ENSG00000070371	48.3656	0.717166	0.153738	4.66485	3.08837e-06	0.000237461	CLTCL1
ENSG00000196664	308.868	0.715655	0.282434	2.53389	0.0112806	0.0658268	TLR7
ENSG00000132464	28.382	0.714223	0.328378	2.175	0.0296302	0.128091	ENAM
ENSG00000204778	205.387	0.713467	0.346909	2.05664	0.0397208	0.155414	CBWD4P
ENSG00000048462	33.812	0.712549	0.220868	3.22614	0.00125473	0.0148117	TNFRSF17
ENSG00000255920	10.2285	0.709265	0.342908	2.06838	0.0386041	0.152561	CCND2-AS1
ENSG00000279865	8.74597	0.70919	0.365329	1.94124	0.0522296	0.187102
ENSG00000196739	17.2735	0.707326	0.346977	2.03854	0.0414962	0.160018	COL27A1
ENSG00000141665	15.9731	0.706022	0.279356	2.52732	0.0114937	0.0665867	FBXO15
ENSG00000117586	272.039	0.704635	0.174399	4.04036	5.33694e-05	0.00171913	TNFSF4
ENSG00000062524	29.9154	0.70401	0.263969	2.66702	0.00765276	0.0504188	LTK
ENSG00000256574	12.8855	0.703448	0.33704	2.08713	0.0368761	0.148095	OR13A1
ENSG00000184785	15.7802	0.703066	0.288149	2.43994	0.0146898	0.078992	SMIM10
ENSG00000277435	14.2046	0.702783	0.334041	2.10388	0.0353887	0.144223
ENSG00000022267	180.902	0.700407	0.193032	3.62845	0.000285131	0.00552318	FHL1
ENSG00000132185	635.931	0.700309	0.145443	4.81501	1.4719e-06	0.000138029	FCRLA
ENSG00000144485	52.2079	0.699435	0.234133	2.98734	0.0028142	0.025624	HES6
ENSG00000151773	36.0703	0.696889	0.321487	2.16771	0.0301809	0.129666	CCDC122
ENSG00000255449	9.67115	0.695614	0.325641	2.13613	0.0326684	0.136553
ENSG00000262228	21.1991	0.695111	0.31108	2.23451	0.0254497	0.115262
ENSG00000120555	7.87591	0.694895	0.352887	1.96917	0.0489335	0.178545	SEPT7P9
ENSG00000058866	22.7017	0.692994	0.316719	2.18804	0.0286666	0.125034	DGKG
ENSG00000283196	70.9939	0.692533	0.355905	1.94584	0.0516744	0.185543
ENSG00000185338	668.328	0.69165	0.326251	2.11999	0.0340068	0.140479	SOCS1
ENSG00000174123	615.394	0.690842	0.172543	4.00389	6.23098e-05	0.00190615	TLR10
ENSG00000255142	36.5486	0.689133	0.210102	3.27999	0.00103809	0.0130202
ENSG00000231609	13.5836	0.68868	0.243257	2.83109	0.00463903	0.035669
ENSG00000079385	129.562	0.688595	0.214166	3.21524	0.00130336	0.0151981	CEACAM1
ENSG00000249786	18.6174	0.688508	0.215114	3.20067	0.0013711	0.0157952	EAF1-AS1
ENSG00000250290	11.862	0.688213	0.329024	2.09168	0.0364673	0.147042	NCAPGP1
ENSG00000176222	99.4813	0.688184	0.153513	4.48291	7.36304e-06	0.000438461	ZNF404
ENSG00000228439	12.8553	0.687658	0.282222	2.43658	0.0148268	0.0795059	TSTD3
ENSG00000080166	14.8893	0.68757	0.343954	1.99902	0.0456063	0.170624	DCT
ENSG00000020577	160.278	0.687003	0.295304	2.32642	0.0199959	0.0978032	SAMD4A
ENSG00000167701	23.7032	0.686029	0.24167	2.8387	0.00452978	0.0352067	GPT
ENSG00000075618	1638.07	0.685009	0.259103	2.64377	0.00819886	0.052888	FSCN1
ENSG00000165617	122.126	0.684106	0.156457	4.3725	1.22831e-05	0.000613544	DACT1
ENSG00000226659	11.8184	0.683789	0.265818	2.57239	0.0100999	0.061197
ENSG00000211895	3763.39	0.682221	0.238546	2.85992	0.00423753	0.0335856	IGHA1
ENSG00000011590	88.1071	0.681423	0.243681	2.79637	0.00516804	0.0384827	ZBTB32
ENSG00000160606	34.3089	0.681398	0.223313	3.05131	0.00227843	0.0221054	TLCD1
ENSG00000275484	10.3036	0.68108	0.325075	2.09515	0.0361579	0.146205
ENSG00000144290	39.9642	0.680852	0.258448	2.63439	0.00842896	0.0538761	SLC4A10
ENSG00000273723	20.097	0.680371	0.228638	2.97575	0.00292269	0.0261725
ENSG00000240505	470.334	0.679591	0.230839	2.94401	0.00323992	0.0280737	TNFRSF13B
ENSG00000123453	300.51	0.679585	0.201705	3.3692	0.000753866	0.0104404	SARDH
ENSG00000167280	2423.59	0.679199	0.0949187	7.15559	8.33143e-13	3.56757e-09	ENGASE
ENSG00000243819	10.5965	0.678994	0.334506	2.02984	0.0423728	0.162084	RN7SL832P
ENSG00000128274	90.479	0.671522	0.326111	2.05918	0.0394768	0.154851	A4GALT
ENSG00000211594	30.0758	0.670729	0.231011	2.90345	0.00369076	0.0305806	IGKJ4
ENSG00000285413	62.4796	0.670402	0.311881	2.14955	0.031591	0.133636
ENSG00000114948	255.065	0.670357	0.174851	3.83389	0.000126133	0.00311322	ADAM23
ENSG00000233614	17.9737	0.669813	0.238598	2.80729	0.0049961	0.0376625	DDX11L10
ENSG00000240527	71.4536	0.66869	0.150596	4.4403	8.98315e-06	0.000497555
ENSG00000169885	14.3324	0.66695	0.324797	2.05343	0.0400306	0.156235	CALML6
ENSG00000264176	49.3918	0.666427	0.153103	4.3528	1.34411e-05	0.000648406	MAGOH2P
ENSG00000239763	33.3969	0.666094	0.209716	3.17617	0.00149235	0.0166658
ENSG00000144152	207.912	0.665703	0.151801	4.38537	1.15791e-05	0.000592288	FBLN7
ENSG00000232470	42.5319	0.664807	0.157384	4.22412	2.39879e-05	0.000991563
ENSG00000204620	10.9834	0.66452	0.286499	2.31945	0.0203708	0.0991755
ENSG00000245869	23.6721	0.662809	0.257242	2.57659	0.0099779	0.0607145
ENSG00000198520	514.643	0.662396	0.169543	3.90695	9.34679e-05	0.00253818	ARMH1
ENSG00000205683	11.7635	0.660089	0.321278	2.05457	0.0399202	0.155992	DPF3
ENSG00000274184	16.8346	0.65925	0.277953	2.37181	0.0177014	0.0898637
ENSG00000169744	28.9887	0.659177	0.330306	1.99566	0.045971	0.171605	LDB2
ENSG00000088992	42.2599	0.659082	0.214568	3.07167	0.00212862	0.0211785	TESC
ENSG00000212588	14.3091	0.656214	0.248479	2.64092	0.00826805	0.0532632	SNORA26
ENSG00000230709	38.5447	0.65544	0.28978	2.26185	0.0237065	0.109795
ENSG00000166707	86.6658	0.654948	0.191878	3.41335	0.000641701	0.00945496	ZCCHC18
ENSG00000241351	434.403	0.65467	0.170353	3.84302	0.00012153	0.00304478	IGKV3-11
ENSG00000278318	95.559	0.652859	0.114332	5.71019	1.12849e-08	5.03257e-06	ZNF229
ENSG00000250321	11.132	0.652539	0.308964	2.11202	0.0346847	0.14211
ENSG00000211592	6918.92	0.652168	0.129115	5.05106	4.39364e-07	5.73085e-05	IGKC
ENSG00000120278	1938.57	0.651661	0.146237	4.4562	8.34264e-06	0.000475625	PLEKHG1
ENSG00000248483	11.4019	0.651187	0.270264	2.40945	0.0159766	0.0838878	POU5F2
ENSG00000170390	13.9649	0.651072	0.338352	1.92425	0.0543237	0.192303	DCLK2
ENSG00000171217	20.9843	0.649868	0.214232	3.03348	0.00241751	0.0230164	CLDN20
ENSG00000198435	18.5674	0.649551	0.256841	2.529	0.0114387	0.0664215	NRARP
ENSG00000168081	36.3814	0.649187	0.242042	2.68213	0.00731547	0.0487244	PNOC
ENSG00000264781	304.028	0.649071	0.173599	3.73891	0.000184824	0.00404475	MIR4537
ENSG00000211898	3082.12	0.649045	0.145115	4.47262	7.72668e-06	0.000452067	IGHD
ENSG00000228889	15.1454	0.648575	0.290727	2.23087	0.0256899	0.115965	UBAC2-AS1
ENSG00000278196	65.3594	0.647554	0.255376	2.53569	0.0112225	0.0656141	IGLV2-8
ENSG00000129116	270.418	0.647411	0.231042	2.80213	0.00507661	0.038014	PALLD
ENSG00000220008	260.297	0.647192	0.231061	2.80095	0.00509522	0.0380907	LINGO3
ENSG00000283696	43.5672	0.647185	0.234664	2.75792	0.00581711	0.0417666
ENSG00000204584	43.2774	0.64631	0.179462	3.60138	0.000316531	0.00598694
ENSG00000235351	16.8596	0.64593	0.302455	2.13562	0.03271	0.136691
ENSG00000278962	104.864	0.645791	0.160735	4.01774	5.87586e-05	0.00183782
ENSG00000188130	38.1877	0.645485	0.229836	2.80846	0.00497786	0.0375844	MAPK12
ENSG00000277511	68.9589	0.645437	0.25343	2.5468	0.0108715	0.0643055
ENSG00000260517	25.9831	0.644679	0.201259	3.20323	0.00135894	0.0156988
ENSG00000278996	263.307	0.642643	0.179789	3.57443	0.000350995	0.00634573
ENSG00000267254	37.3133	0.64182	0.196391	3.26807	0.00108284	0.0134804
ENSG00000250312	245.587	0.641543	0.220367	2.91126	0.00359979	0.0300127	ZNF718
ENSG00000176490	151.905	0.640995	0.24433	2.62348	0.00870368	0.055053	DIRAS1
ENSG00000257151	138.431	0.640881	0.201763	3.1764	0.00149115	0.0166617	PWAR6
ENSG00000235408	17.988	0.640856	0.249149	2.57218	0.0101061	0.061216	SNORA71B
ENSG00000243289	71.8514	0.640184	0.307045	2.08498	0.0370711	0.148551	AGAP13P
ENSG00000268225	18.9454	0.638934	0.301932	2.11615	0.0343317	0.141235
ENSG00000255503	9.09493	0.637382	0.316313	2.01504	0.0439008	0.16618
ENSG00000187066	10.1556	0.637021	0.321438	1.98179	0.047503	0.175108	TMEM262
ENSG00000127920	445.588	0.63697	0.224738	2.83428	0.00459287	0.0354812	GNG11
ENSG00000075340	179.103	0.63665	0.225542	2.82275	0.0047613	0.0363445	ADD2
ENSG00000250397	13.2072	0.636633	0.258672	2.46116	0.0138488	0.0758126
ENSG00000283399	80.0405	0.636606	0.207239	3.07185	0.0021274	0.0211769
ENSG00000100968	94.6406	0.635345	0.163723	3.88061	0.000104195	0.00272683	NFATC4
ENSG00000197520	72.7766	0.632684	0.2355	2.68656	0.00721926	0.0482277	FAM177B
ENSG00000235308	10.5498	0.632222	0.322226	1.96205	0.0497571	0.180944
ENSG00000277806	11.039	0.6316	0.326089	1.93689	0.0527583	0.188558
ENSG00000101187	1159.27	0.63073	0.321473	1.962	0.0497623	0.180944	SLCO4A1
ENSG00000277662	16.3668	0.630206	0.240498	2.62043	0.008782	0.0554729
ENSG00000137970	1650.05	0.630029	0.294356	2.14036	0.0323256	0.1356	RPL7P9
ENSG00000280003	16.4892	0.62955	0.255095	2.4679	0.0135906	0.0749483
ENSG00000139714	164.406	0.628481	0.168502	3.7298	0.000191628	0.00415073	MORN3
ENSG00000140511	4361.28	0.628113	0.207284	3.03021	0.00244386	0.0231555	HAPLN3
ENSG00000155966	169.832	0.626641	0.196742	3.18509	0.00144711	0.0163701	AFF2
ENSG00000131650	24.1606	0.626284	0.259947	2.40928	0.0159842	0.0839057	KREMEN2
ENSG00000250155	21.8402	0.625859	0.255129	2.45311	0.0141628	0.0769824
ENSG00000186049	41.9292	0.624963	0.226312	2.76151	0.00575341	0.0415172	KRT73
ENSG00000136378	270.348	0.624313	0.27898	2.23784	0.0252317	0.114611	ADAMTS7
ENSG00000135144	525.502	0.624113	0.152021	4.10545	4.03531e-05	0.00141823	DTX1
ENSG00000211660	284.705	0.62402	0.224469	2.77998	0.00543627	0.0398885	IGLV2-23
ENSG00000224505	15.8537	0.623291	0.285831	2.18063	0.0292106	0.126796
ENSG00000234335	18.3524	0.620438	0.235058	2.63951	0.00830249	0.053402	RPS4XP11
ENSG00000232677	264.262	0.620161	0.217777	2.84769	0.00440378	0.0346162	LINC00665
ENSG00000121858	1551.42	0.618088	0.225237	2.74417	0.00606643	0.042927	TNFSF10
ENSG00000236334	24.4755	0.616988	0.296045	2.0841	0.0371507	0.148692	PPIAL4G
ENSG00000229873	20.5946	0.616667	0.256455	2.40458	0.0161909	0.0845566	OGFR-AS1
ENSG00000119865	16.7525	0.615252	0.306066	2.01019	0.0444109	0.167212	CNRIP1
ENSG00000112486	23.181	0.61411	0.282669	2.17254	0.0298147	0.128533	CCR6
ENSG00000269800	12.4834	0.613505	0.316622	1.93766	0.0526651	0.188292	PLEKHA3P1
ENSG00000107147	25.1423	0.613307	0.237544	2.58187	0.00982658	0.0599938	KCNT1
ENSG00000229689	30.4842	0.611858	0.19837	3.08443	0.00203942	0.0206182
ENSG00000135074	2178.25	0.611332	0.163419	3.74087	0.000183382	0.00402638	ADAM19
ENSG00000197279	36.093	0.611063	0.187184	3.2645	0.00109656	0.0135838	ZNF165
ENSG00000234618	384.864	0.610838	0.238399	2.56225	0.0103996	0.0624662	RPSAP9
ENSG00000246339	14.5257	0.608603	0.289308	2.10365	0.0354089	0.144223	EXTL3-AS1
ENSG00000198478	35.1182	0.608409	0.294097	2.06874	0.0385705	0.152459	SH3BGRL2
ENSG00000189057	743.627	0.608337	0.187378	3.24658	0.001168	0.0141542	FAM111B
ENSG00000164116	54.1726	0.608001	0.253072	2.40248	0.0162844	0.0848597	GUCY1A1
ENSG00000226416	29.6449	0.60777	0.257585	2.35949	0.0183002	0.0919731	MRPL23-AS1
ENSG00000197465	21.9204	0.607549	0.270284	2.24781	0.024588	0.112888	GYPE
ENSG00000006740	24.7821	0.607191	0.22897	2.65184	0.00800552	0.0520086	ARHGAP44
ENSG00000271335	49.3102	0.606015	0.181078	3.34671	0.000817777	0.0110438
ENSG00000111863	474.827	0.605155	0.139252	4.34575	1.38801e-05	0.000663202	ADTRP
ENSG00000116191	2075.1	0.60297	0.13112	4.59861	4.25326e-06	0.000291175	RALGPS2
ENSG00000211956	395.446	0.602664	0.12856	4.68779	2.76168e-06	0.000218195	IGHV4-34
ENSG00000174028	89.6069	0.602521	0.274774	2.19278	0.0283229	0.124013	FAM3C2
ENSG00000127955	45.4388	0.602224	0.214596	2.80631	0.00501124	0.0376932	GNAI1
ENSG00000186871	59.0643	0.600973	0.192046	3.12932	0.00175213	0.0186041	ERCC6L
ENSG00000171992	232.427	0.600216	0.188298	3.18758	0.0014347	0.0162573	SYNPO
ENSG00000188822	365.209	0.599532	0.186047	3.22248	0.00127084	0.0149404	CNR2
ENSG00000284606	149.64	0.599111	0.165794	3.61359	0.000301992	0.00578278
ENSG00000263326	23.1358	0.598406	0.263961	2.26702	0.023389	0.108802
ENSG00000168255	605.847	0.598382	0.141168	4.23878	2.24737e-05	0.000951481	POLR2J3
ENSG00000174175	34.5792	0.596883	0.292173	2.04291	0.0410616	0.158964	SELP
ENSG00000175841	18.7826	0.596643	0.286574	2.08199	0.0373435	0.149109	FAM172BP
ENSG00000255468	34.6582	0.596472	0.212355	2.80884	0.00497204	0.0375815
ENSG00000113249	55.4742	0.594932	0.260009	2.28812	0.0221306	0.104794	HAVCR1
ENSG00000212993	11.1602	0.59485	0.2731	2.17814	0.0293957	0.127328	POU5F1B
ENSG00000163354	12.5584	0.594846	0.266118	2.23527	0.0253997	0.115113	DCST2
ENSG00000197635	635.444	0.593884	0.138507	4.28775	1.8049e-05	0.000810309	DPP4
ENSG00000271576	28.1949	0.593866	0.225719	2.631	0.00851346	0.0542375
ENSG00000280441	401.864	0.592154	0.170345	3.47621	0.000508553	0.00817105
ENSG00000104081	1811.69	0.591507	0.127	4.65754	3.20009e-06	0.000241426	BMF
ENSG00000155093	32.3817	0.59065	0.22252	2.65437	0.00794573	0.0517207	PTPRN2
ENSG00000134864	46.5028	0.590474	0.201951	2.92385	0.0034573	0.0292131	GGACT
ENSG00000260807	256.551	0.58962	0.191441	3.0799	0.00207067	0.0208095
ENSG00000270557	14.249	0.58859	0.259461	2.26851	0.0232983	0.108606
ENSG00000274615	681.608	0.588252	0.244773	2.40326	0.0162496	0.0847447
ENSG00000284946	43.9116	0.587166	0.160504	3.65826	0.000253933	0.00507562
ENSG00000105426	207.466	0.585987	0.180873	3.23977	0.00119627	0.0144011	PTPRS
ENSG00000090104	2703.49	0.585774	0.283345	2.06735	0.0387008	0.152826	RGS1
ENSG00000212664	253.355	0.585492	0.28986	2.01992	0.043392	0.164759
ENSG00000154721	50.8814	0.58438	0.208843	2.79817	0.00513924	0.0383313	JAM2
ENSG00000228382	10.6074	0.584114	0.301263	1.93888	0.0525156	0.187891	ITPKB-IT1
ENSG00000228253	3582.49	0.583765	0.168686	3.46066	0.000538844	0.00849443	MT-ATP8
ENSG00000167103	34.7305	0.583619	0.216862	2.6912	0.00711958	0.0477366	PIP5KL1
ENSG00000211595	29.5332	0.583352	0.210891	2.76613	0.00567263	0.0410821	IGKJ3
ENSG00000204271	162.547	0.582766	0.110021	5.29687	1.17804e-07	2.27848e-05	SPIN3
ENSG00000073670	19.5553	0.581632	0.268917	2.16287	0.0305514	0.130978	ADAM11
ENSG00000272417	8.88457	0.581459	0.30473	1.90811	0.0563769	0.196558
ENSG00000218265	10.8321	0.579025	0.292241	1.98133	0.0475542	0.175233	RPS4XP7
ENSG00000214711	33.7275	0.578242	0.218575	2.64551	0.00815679	0.0527184	CAPN14
ENSG00000105270	136.136	0.578129	0.185603	3.11487	0.00184028	0.0191351	CLIP3
ENSG00000151150	755.258	0.578045	0.193693	2.98434	0.00284194	0.0257538	ANK3
ENSG00000248863	19.5351	0.576968	0.212904	2.71	0.00672838	0.0459582
ENSG00000126790	305.419	0.576802	0.15443	3.73503	0.000187692	0.00409353	L3HYPDH
ENSG00000183423	16.0971	0.576026	0.250283	2.3015	0.0213632	0.10243	LRIT3
ENSG00000121570	190.212	0.574931	0.204807	2.80718	0.00499777	0.0376625	DPPA4
ENSG00000276842	55.6604	0.57431	0.20411	2.81373	0.00489697	0.03714
ENSG00000234797	1663.63	0.574126	0.239466	2.39752	0.0165063	0.0856602	RPS3AP6
ENSG00000231439	13.6183	0.573501	0.284496	2.01585	0.043816	0.165999	WASIR2
ENSG00000229056	67.8397	0.5733	0.160366	3.57494	0.000350306	0.006339	HECW2-AS1
ENSG00000110318	124.032	0.572717	0.176295	3.24862	0.00115966	0.0140787	CEP126
ENSG00000114529	103.273	0.57192	0.143749	3.97861	6.93205e-05	0.0020518	C3orf52
ENSG00000162994	117.766	0.571167	0.153531	3.7202	0.000199063	0.00425763	CLHC1
ENSG00000269896	41.6603	0.571033	0.219357	2.60321	0.00923549	0.0573624
ENSG00000167799	35.0324	0.569634	0.172313	3.30581	0.000947018	0.0121436	NUDT8
ENSG00000269404	536.961	0.569341	0.146627	3.88294	0.000103203	0.00271438	SPIB
ENSG00000254362	21.8334	0.568929	0.214292	2.65493	0.00793255	0.0516673
ENSG00000261000	13.2354	0.567853	0.257754	2.20308	0.0275889	0.121843
ENSG00000285725	46.3473	0.567664	0.166787	3.40352	0.000665237	0.00966689
ENSG00000284981	170.206	0.567361	0.185826	3.05318	0.00226428	0.0220242
ENSG00000108679	1678.05	0.566763	0.232757	2.43499	0.014892	0.0797792	LGALS3BP
ENSG00000188227	234.284	0.566359	0.114201	4.9593	7.07464e-07	7.96473e-05	ZNF793
ENSG00000114656	19.8258	0.566014	0.255641	2.2141	0.026822	0.119561	KIAA1257
ENSG00000104432	79.4067	0.565939	0.269931	2.09661	0.0360284	0.145809	IL7
ENSG00000143167	444.012	0.565702	0.182881	3.09328	0.00197958	0.0201451	GPA33
ENSG00000211648	293.647	0.565351	0.24572	2.3008	0.0214032	0.102511	IGLV1-47
ENSG00000005187	323.525	0.565248	0.151563	3.72945	0.000191899	0.00415073	ACSM3
ENSG00000132122	56.1254	0.564071	0.180516	3.12478	0.0017794	0.0187844	SPATA6
ENSG00000235381	46.665	0.563733	0.184713	3.05194	0.00227366	0.0220851
ENSG00000222020	13.8274	0.563632	0.289553	1.94656	0.0515875	0.185298	HDAC4-AS1
ENSG00000136573	1055.71	0.562345	0.139656	4.02665	5.65774e-05	0.00179085	BLK
ENSG00000278376	32.0999	0.562209	0.204147	2.75395	0.00588815	0.042066
ENSG00000138623	1536.79	0.561505	0.204534	2.74529	0.00604583	0.0428623	SEMA7A
ENSG00000270659	40.718	0.561461	0.225545	2.48936	0.0127975	0.071898
ENSG00000259772	20.3611	0.560992	0.243775	2.30127	0.0213761	0.10243
ENSG00000226688	169.318	0.560858	0.120895	4.63921	3.49738e-06	0.000257514	ENTPD1-AS1
ENSG00000179846	16.6234	0.559875	0.281602	1.98818	0.0467922	0.17338	NKPD1
ENSG00000204789	54.1799	0.559647	0.218375	2.56278	0.0103839	0.0623902	ZNF204P
ENSG00000197928	219.87	0.559391	0.109749	5.09701	3.45057e-07	4.87648e-05	ZNF677
ENSG00000249264	154.002	0.558673	0.272197	2.05246	0.0401253	0.156387	EEF1A1P9
ENSG00000272037	28.5542	0.557902	0.214176	2.60488	0.00919072	0.0572785
ENSG00000277007	17.4111	0.556933	0.224983	2.47544	0.0133071	0.0738105
ENSG00000105737	53.4357	0.555992	0.199757	2.78334	0.00538021	0.0396221	GRIK5
ENSG00000187912	861.838	0.555153	0.14149	3.92363	8.72244e-05	0.00241502	CLEC17A
ENSG00000270562	28.2411	0.55408	0.213081	2.60033	0.00931348	0.0577039
ENSG00000110777	1283.56	0.553113	0.133896	4.13093	3.61304e-05	0.00132116	POU2AF1
ENSG00000178773	68.6425	0.552002	0.244656	2.25624	0.0240555	0.111001	CPNE7
ENSG00000158859	31.6077	0.551318	0.289979	1.90123	0.0572715	0.198876	ADAMTS4
ENSG00000123836	349.682	0.551004	0.126627	4.35138	1.35283e-05	0.000651046	PFKFB2
ENSG00000211679	1054.23	0.550935	0.174254	3.16168	0.00156863	0.0171269	IGLC3
ENSG00000253047	13.0201	0.550474	0.268847	2.04754	0.0406053	0.157642
ENSG00000146416	83.5565	0.550352	0.133663	4.11745	3.83091e-05	0.00136795	AIG1
ENSG00000132016	13.311	0.549325	0.264941	2.07339	0.0381362	0.151218	C19orf57
ENSG00000211644	304.718	0.54912	0.161351	3.40327	0.000665846	0.00966732	IGLV1-51
ENSG00000207110	18.9315	0.547247	0.262789	2.08246	0.0373008	0.149025	RNU1-106P
ENSG00000137101	614.067	0.546881	0.19158	2.85459	0.00430927	0.0340198	CD72
ENSG00000185495	196.845	0.546068	0.135854	4.01952	5.83163e-05	0.00183144
ENSG00000061918	33.8838	0.545939	0.206846	2.63935	0.00830647	0.0534105	GUCY1B1
ENSG00000188372	96.353	0.545917	0.235443	2.31868	0.0204122	0.0992741	ZP3
ENSG00000205755	319.852	0.545364	0.183425	2.97322	0.00294688	0.0263421	CRLF2
ENSG00000146192	1297.7	0.544389	0.163526	3.32907	0.00087138	0.0114368	FGD2
ENSG00000198938	49657.3	0.544311	0.118339	4.5996	4.23311e-06	0.000291175	MT-CO3
ENSG00000155970	119.137	0.544091	0.146246	3.72039	0.000198919	0.00425763	MICU3
ENSG00000261438	28.6958	0.54383	0.272655	1.99457	0.0460899	0.171857
ENSG00000171916	171.293	0.542891	0.256884	2.11337	0.0345693	0.141853	LGALS9C
ENSG00000277142	21.4806	0.541645	0.208741	2.59482	0.00946406	0.0584204	LINC00235
ENSG00000225460	17.4541	0.541643	0.256246	2.11376	0.0345358	0.141797
ENSG00000169962	31.6885	0.541559	0.186172	2.90891	0.00362688	0.0301634	TAS1R3
ENSG00000116299	53.6168	0.541392	0.222657	2.43151	0.0150362	0.0804409	KIAA1324
ENSG00000213757	59.6403	0.540946	0.170602	3.1708	0.00152021	0.0168643
ENSG00000100346	173.876	0.539983	0.17601	3.0679	0.00215568	0.0213525	CACNA1I
ENSG00000167861	32.4933	0.537963	0.169541	3.17306	0.00150841	0.0167705	HID1
ENSG00000281706	20.242	0.537648	0.210136	2.55857	0.0105103	0.0629239
ENSG00000077713	222.021	0.536875	0.154057	3.4849	0.000492315	0.0080063	SLC25A43
ENSG00000105369	3276.9	0.5364	0.109508	4.89828	9.66812e-07	0.000100714	CD79A
ENSG00000167555	365.338	0.536337	0.0800657	6.69871	2.10263e-11	4.21957e-08	ZNF528
ENSG00000148498	185.879	0.535713	0.145038	3.69361	0.000221091	0.00459778	PARD3
ENSG00000173678	1028.7	0.534696	0.127013	4.20978	2.55617e-05	0.00103809	SPDYE2B
ENSG00000253651	45.8976	0.533093	0.270106	1.97364	0.0484226	0.177367	SOD1P3
ENSG00000223884	23.4945	0.533067	0.244774	2.1778	0.0294213	0.127384
ENSG00000211938	355.751	0.53038	0.194912	2.72112	0.00650606	0.0449909	IGHV3-7
ENSG00000152104	23.3763	0.529937	0.268603	1.97293	0.048503	0.177523	PTPN14
ENSG00000228863	60.6933	0.527763	0.211307	2.49762	0.0125031	0.0707196
ENSG00000258733	71.6678	0.527483	0.179015	2.94658	0.00321308	0.0279619	LINC02328
ENSG00000255200	26.2229	0.527319	0.236717	2.22763	0.0259053	0.116667	PGAM1P8
ENSG00000163827	170.246	0.526256	0.133911	3.92989	8.49861e-05	0.00236875	LRRC2
ENSG00000119866	1043.47	0.525669	0.113225	4.6427	3.43892e-06	0.000255601	BCL11A
ENSG00000211955	529.628	0.525416	0.178094	2.95021	0.00317561	0.0277199	IGHV3-33
ENSG00000237886	23.3404	0.524826	0.268097	1.9576	0.0502774	0.182025	NALT1
ENSG00000115841	76.4296	0.524464	0.141657	3.70236	0.000213599	0.00449992	RMDN2
ENSG00000268403	19.2877	0.524393	0.273837	1.91498	0.0554945	0.194526
ENSG00000158423	14.2959	0.524312	0.270294	1.93978	0.052406	0.187533	RIBC1
ENSG00000204252	949.45	0.524203	0.131598	3.98338	6.79427e-05	0.00202296	HLA-DOA
ENSG00000213213	19.6821	0.523369	0.199219	2.6271	0.00861157	0.0546788	CCDC183
ENSG00000242607	27.2137	0.523322	0.258145	2.02724	0.0426378	0.162831	RPS3AP34
ENSG00000237111	110.527	0.523294	0.199728	2.62003	0.00879218	0.0554797	IGHJ3P
ENSG00000225978	34.4393	0.523243	0.215224	2.43115	0.015051	0.080459	HAR1A
ENSG00000158528	63.1798	0.523098	0.223105	2.34463	0.0190461	0.0946205	PPP1R9A
ENSG00000254912	108.12	0.522966	0.236813	2.20835	0.0272201	0.120699
ENSG00000261766	17.1513	0.522172	0.239072	2.18416	0.0289503	0.125888
ENSG00000224373	526.909	0.521917	0.196592	2.65483	0.00793495	0.0516673	IGHV4-59
ENSG00000250790	22.636	0.521546	0.271961	1.91772	0.0551462	0.194153
ENSG00000112195	197.04	0.52147	0.228524	2.2819	0.0224953	0.105971	TREML2
ENSG00000179388	573.338	0.520719	0.225071	2.31358	0.0206908	0.100078	EGR3
ENSG00000107438	445.076	0.520435	0.147212	3.53528	0.000407338	0.00701068	PDLIM1
ENSG00000213693	24.6405	0.520069	0.217376	2.39249	0.0167345	0.0865315	SEC14L1P1
ENSG00000173848	290.671	0.518595	0.14169	3.66008	0.000252138	0.00504477	NET1
ENSG00000156738	7486.63	0.518275	0.150855	3.43558	0.000591279	0.00898201	MS4A1
ENSG00000106526	64.3907	0.518026	0.170817	3.03264	0.00242425	0.0230458	ACTR3C
ENSG00000233056	302.948	0.517921	0.144011	3.5964	0.000322657	0.00601214	ERVH48-1
ENSG00000180336	15.3642	0.51744	0.260794	1.98409	0.0472453	0.174479	MEIOC
ENSG00000166123	124.079	0.517434	0.143872	3.59648	0.00032255	0.00601214	GPT2
ENSG00000271780	26.6576	0.516116	0.23116	2.23272	0.0255674	0.115638
ENSG00000221946	42.8481	0.515812	0.230473	2.23806	0.025217	0.114596	FXYD7
ENSG00000184005	38.4662	0.515291	0.221021	2.33141	0.0197316	0.0969575	ST6GALNAC3
ENSG00000145390	657.57	0.514784	0.130058	3.95811	7.55463e-05	0.00218453	USP53
ENSG00000049768	286.795	0.514748	0.15379	3.34707	0.000816696	0.0110438	FOXP3
ENSG00000035720	470.932	0.5145	0.158408	3.24794	0.00116245	0.0141037	STAP1
ENSG00000259488	14.1258	0.513718	0.267687	1.9191	0.0549722	0.193813
ENSG00000152782	73.2677	0.513246	0.173328	2.96113	0.00306517	0.0270781	PANK1
ENSG00000228852	23.14	0.513234	0.246095	2.08551	0.0370227	0.148446
ENSG00000072694	443.711	0.513059	0.249905	2.05302	0.0400711	0.156286	FCGR2B
ENSG00000013016	336.49	0.512362	0.176831	2.89747	0.00376188	0.0309839	EHD3
ENSG00000183943	2798.86	0.512147	0.106175	4.82362	1.40974e-06	0.00013667	PRKX
ENSG00000117411	99.5959	0.512079	0.156061	3.28128	0.00103337	0.012991	B4GALT2
ENSG00000196656	2297.72	0.511509	0.203305	2.51597	0.0118707	0.0681215
ENSG00000184903	85.5308	0.510392	0.127093	4.01589	5.92222e-05	0.00184545	IMMP2L
ENSG00000272398	621.392	0.510237	0.171068	2.98266	0.00285752	0.0258406	CD24
ENSG00000008517	8143.02	0.510172	0.165617	3.08044	0.00206697	0.0207993	IL32
ENSG00000183010	157.873	0.510028	0.136823	3.72764	0.000193282	0.00417523	PYCR1
ENSG00000125246	154.012	0.509881	0.111201	4.58521	4.53528e-06	0.000305416	CLYBL
ENSG00000162892	2880.93	0.508412	0.254838	1.99504	0.0460389	0.171794	IL24
ENSG00000082293	215.452	0.507785	0.191539	2.65108	0.0080236	0.0520924	COL19A1
ENSG00000178386	26.7307	0.507318	0.2614	1.94078	0.0522854	0.187235	ZNF223
ENSG00000105948	51.013	0.507259	0.145055	3.49702	0.000470486	0.00776457	TTC26
ENSG00000166681	190.799	0.50704	0.230942	2.19553	0.0281256	0.123588	BEX3
ENSG00000133027	99.4453	0.506789	0.110956	4.56748	4.93629e-06	0.00032586	PEMT
ENSG00000165905	406.814	0.506357	0.174191	2.90691	0.00365021	0.0303071	LARGE2
ENSG00000278601	17.9286	0.505954	0.222703	2.27188	0.0230939	0.107879
ENSG00000260912	48.6186	0.505151	0.15996	3.15798	0.00158865	0.0172985
ENSG00000205056	240.919	0.504897	0.185578	2.72067	0.00651497	0.0450167	LINC02397
ENSG00000212829	325.193	0.5042	0.222379	2.2673	0.0233719	0.108773	RPS26P3
ENSG00000180758	494.474	0.504142	0.166336	3.03087	0.00243852	0.0231159	GPR157
ENSG00000099814	114.793	0.504031	0.171944	2.93137	0.00337471	0.0287746	CEP170B
ENSG00000275202	25.9749	0.503027	0.232693	2.16176	0.0306367	0.131118
ENSG00000196933	136.438	0.501989	0.253061	1.98367	0.0472927	0.174546	RPS26P11
ENSG00000247982	3142.11	0.500866	0.154544	3.24092	0.00119146	0.0143605	LINC00926
ENSG00000259429	53.4392	0.499533	0.221475	2.25549	0.0241029	0.111144	UBE2Q2P2
ENSG00000214535	24.5544	0.499478	0.217519	2.29625	0.0216615	0.103329	RPS15AP1
ENSG00000064989	369.045	0.498935	0.224073	2.22666	0.0259697	0.116721	CALCRL
ENSG00000152207	104.514	0.498118	0.149672	3.32807	0.000874509	0.0114681	CYSLTR2
ENSG00000186468	2027.1	0.497435	0.0776405	6.40689	1.48514e-10	1.86274e-07	RPS23
ENSG00000164484	92.5206	0.497088	0.209804	2.36929	0.0178222	0.0903625	TMEM200A
ENSG00000272602	137.33	0.496212	0.1595	3.11104	0.00186428	0.0192962	ZNF595
ENSG00000255122	24.7539	0.495827	0.230197	2.15393	0.031246	0.132769
ENSG00000233665	24.1041	0.495655	0.228391	2.17021	0.0299912	0.129044
ENSG00000204323	31.4512	0.495203	0.21975	2.25348	0.0242288	0.111514	SMIM5
ENSG00000278416	143.741	0.49471	0.12335	4.01061	6.05626e-05	0.00186406	PMS2P2
ENSG00000106484	82.3744	0.494249	0.153453	3.22085	0.00127811	0.0149922	MEST
ENSG00000213621	278.768	0.492354	0.164509	2.99286	0.00276374	0.0253486	RPSAP54
ENSG00000130653	423.593	0.491792	0.147411	3.33619	0.00084936	0.0112955	PNPLA7
ENSG00000167483	2280.24	0.491733	0.189705	2.59209	0.00953961	0.0587341	FAM129C
ENSG00000151914	141.773	0.490686	0.126	3.89433	9.84714e-05	0.00262527	DST
ENSG00000227725	19.942	0.490325	0.250172	1.95995	0.0500014	0.181386	GCOM2
ENSG00000174607	82.0057	0.489848	0.200471	2.44349	0.0145461	0.0784284	UGT8
ENSG00000081985	606.328	0.489647	0.203752	2.40315	0.0162543	0.084745	IL12RB2
ENSG00000170469	51.2939	0.489392	0.154182	3.17412	0.00150293	0.0167353	SPATA24
ENSG00000146215	39.7953	0.48933	0.224545	2.1792	0.0293166	0.127123	CRIP3
ENSG00000272269	28.3555	0.489267	0.215261	2.2729	0.0230324	0.107743
ENSG00000095585	737.454	0.489236	0.124851	3.91854	8.9087e-05	0.00244904	BLNK
ENSG00000254165	25.2984	0.489093	0.215185	2.2729	0.0230325	0.107743
ENSG00000141753	559.896	0.488996	0.168362	2.90444	0.00367912	0.0305219	IGFBP4
ENSG00000070018	224.13	0.488817	0.19271	2.53654	0.0111953	0.0655581	LRP6
ENSG00000285851	19.8536	0.488381	0.21367	2.28568	0.0222731	0.10522
ENSG00000240036	171.497	0.48546	0.143952	3.37237	0.000745253	0.0103859
ENSG00000273449	29.6164	0.48538	0.237404	2.04453	0.0409008	0.158516
ENSG00000155265	305.579	0.485378	0.124941	3.88487	0.000102387	0.00270512	GOLGA7B
ENSG00000099840	256.642	0.485293	0.145746	3.32971	0.000869356	0.0114206	IZUMO4
ENSG00000164251	61.189	0.484561	0.240442	2.0153	0.0438737	0.166124	F2RL1
ENSG00000063241	223.826	0.483363	0.103481	4.67103	2.99697e-06	0.000232213	ISOC2
ENSG00000155974	54.8887	0.483355	0.190941	2.53144	0.0113595	0.0661646	GRIP1
ENSG00000241106	184.036	0.482618	0.187976	2.56744	0.0102452	0.0617419	HLA-DOB
ENSG00000205871	22.72	0.482155	0.218954	2.20208	0.0276596	0.122074	RPS3AP47
ENSG00000279168	377.574	0.481936	0.149609	3.2213	0.00127609	0.0149845
ENSG00000213658	365.496	0.481759	0.114759	4.19803	2.6925e-05	0.00106785	LAT
ENSG00000231793	150.018	0.481263	0.187334	2.56902	0.0101987	0.0615726	DOC2GP
ENSG00000259984	37.706	0.481006	0.244643	1.96616	0.0492807	0.179616
ENSG00000081026	186.278	0.4803	0.136699	3.51355	0.00044216	0.00745027	MAGI3
ENSG00000140543	56.37	0.480233	0.15663	3.06604	0.00216918	0.0214333	DET1
ENSG00000261247	37.1225	0.480093	0.237008	2.02564	0.0428022	0.163113	GOLGA8T
ENSG00000202058	22.7475	0.479661	0.240316	1.99595	0.0459389	0.171517	RN7SKP80
ENSG00000198034	19755	0.479508	0.0949561	5.04979	4.42304e-07	5.73085e-05	RPS4X
ENSG00000253540	45.2982	0.479092	0.232918	2.05691	0.0396945	0.155402	FAM86HP
ENSG00000279066	38.8269	0.477259	0.178838	2.66866	0.00761543	0.0502553	HEXD-IT1
ENSG00000205238	1058.7	0.477238	0.118547	4.02573	5.67978e-05	0.00179499	SPDYE2
ENSG00000147996	964.957	0.477058	0.145497	3.27881	0.00104247	0.013067	CBWD5
ENSG00000102349	221.035	0.47704	0.16449	2.90011	0.00373031	0.0308319	KLF8
ENSG00000279727	20.2393	0.47695	0.221441	2.15385	0.0312522	0.132769	LINC02033
ENSG00000159958	2217.16	0.476608	0.137439	3.46777	0.000524789	0.00831869	TNFRSF13C
ENSG00000205041	48.7399	0.476456	0.180605	2.63811	0.00833692	0.0535548
ENSG00000185112	321.07	0.476115	0.139017	3.42487	0.000615092	0.00919112	FAM43A
ENSG00000178947	31.1836	0.475417	0.20643	2.30304	0.0212764	0.102196	SMIM10L2A
ENSG00000197978	319.013	0.474962	0.181841	2.61197	0.00900214	0.0564194	GOLGA6L9
ENSG00000226950	391.094	0.474517	0.0859689	5.51963	3.39717e-08	1.03295e-05	DANCR
ENSG00000212864	35.873	0.474183	0.175126	2.70767	0.00677567	0.0461834	RNF208
ENSG00000173674	2054.52	0.47407	0.0936703	5.06105	4.16957e-07	5.54139e-05	EIF1AX
ENSG00000109452	401.689	0.473872	0.14601	3.24548	0.00117252	0.0141833	INPP4B
ENSG00000169314	29.866	0.473399	0.188294	2.51415	0.0119318	0.0682762	C22orf15
ENSG00000118507	129.874	0.473289	0.123078	3.84544	0.000120334	0.00302568	AKAP7
ENSG00000215483	32.6103	0.473059	0.20829	2.27115	0.023138	0.108035	LINC00598
ENSG00000196092	3021.01	0.472844	0.139294	3.39458	0.000687351	0.00983409	PAX5
ENSG00000121621	74.8835	0.472681	0.173857	2.71879	0.00655205	0.0451844	KIF18A
ENSG00000148143	49.4256	0.472515	0.19049	2.48052	0.0131191	0.0731803	ZNF462
ENSG00000114993	81.9983	0.472371	0.175533	2.69106	0.00712245	0.0477399	RTKN
ENSG00000157326	263.14	0.472281	0.174015	2.71402	0.00664719	0.045621	DHRS4
ENSG00000173898	30.7631	0.471964	0.209894	2.24858	0.0245389	0.11274	SPTBN2
ENSG00000157429	41.4344	0.471482	0.200204	2.35501	0.0185223	0.092764	ZNF19
ENSG00000154102	193.71	0.469846	0.140975	3.33283	0.00085967	0.0113499	C16orf74
ENSG00000224429	31.1679	0.469581	0.225438	2.08297	0.0372538	0.148897	LINC00539
ENSG00000214975	498.721	0.468712	0.169869	2.75925	0.00579339	0.0416858	PPIAP29
ENSG00000204934	119.8	0.468599	0.136134	3.44218	0.000577037	0.00883968	ATP6V0E2-AS1
ENSG00000163534	959.262	0.468167	0.205351	2.27984	0.0226173	0.106371	FCRL1
ENSG00000143429	45.7564	0.467817	0.241488	1.93723	0.0527176	0.188446	LSP1P4
ENSG00000248334	744.083	0.467783	0.114445	4.0874	4.36238e-05	0.00150679	WHAMMP2
ENSG00000155792	24.122	0.46775	0.226741	2.06293	0.0391197	0.153842	DEPTOR
ENSG00000153885	78.6623	0.466952	0.171984	2.71508	0.00662588	0.0455214	KCTD15
ENSG00000182010	629.192	0.466167	0.176867	2.63569	0.00839665	0.0537664	RTKN2
ENSG00000260097	651.329	0.465956	0.161407	2.88683	0.00389139	0.0317837	SPDYE6
ENSG00000171649	319.068	0.465137	0.0678089	6.85953	6.90898e-12	1.73312e-08	ZIK1
ENSG00000267710	29.0595	0.465086	0.178911	2.59954	0.00933487	0.0577829	EDDM13
ENSG00000120093	166.802	0.46454	0.188599	2.46311	0.0137738	0.0756134	HOXB3
ENSG00000285756	1513.78	0.462262	0.174012	2.6565	0.00789568	0.0515669
ENSG00000116544	22.5547	0.461595	0.229549	2.01088	0.0443381	0.167103	DLGAP3
ENSG00000105472	35.0633	0.461416	0.209171	2.20593	0.0273888	0.121199	CLEC11A
ENSG00000162645	14220.9	0.461389	0.215731	2.13872	0.0324582	0.135939	GBP2
ENSG00000075275	518.868	0.460808	0.200256	2.30109	0.0213866	0.102456	CELSR1
ENSG00000278987	27.9437	0.4608	0.194563	2.36838	0.0178663	0.0905636
ENSG00000285813	35.2578	0.460712	0.173403	2.65689	0.0078866	0.0515364
ENSG00000102471	117.689	0.458889	0.19011	2.41381	0.0157867	0.0834143	NDFIP2
ENSG00000119599	279.184	0.458885	0.083992	5.46343	4.67015e-08	1.19383e-05	DCAF4
ENSG00000266402	19.916	0.458534	0.212277	2.16008	0.0307668	0.131308	SNHG25
ENSG00000226329	24.779	0.458157	0.224642	2.0395	0.0414004	0.159712
ENSG00000278195	351.23	0.456597	0.190677	2.39461	0.0166383	0.0861002	SSTR3
ENSG00000260948	40.0664	0.456156	0.148249	3.07696	0.00209123	0.0209672
ENSG00000271895	35.793	0.455486	0.184937	2.46293	0.0137807	0.0756134
ENSG00000240875	82.1147	0.455352	0.160333	2.84004	0.00451085	0.0351412	LINC00886
ENSG00000249348	20.2119	0.454865	0.23779	1.91289	0.0557624	0.195227	UGDH-AS1
ENSG00000105767	66.1745	0.454483	0.157694	2.88206	0.00395086	0.0320621	CADM4
ENSG00000243238	162.969	0.4541	0.225884	2.01033	0.0443966	0.167206	IGKV2-30
ENSG00000260160	34.0027	0.454096	0.17583	2.58258	0.0098064	0.0599071
ENSG00000076554	503.332	0.453884	0.14322	3.16915	0.00152887	0.0169035	TPD52
ENSG00000198695	15371.3	0.453857	0.0629601	7.20865	5.65102e-13	3.56757e-09	MT-ND6
ENSG00000144218	1382.96	0.453317	0.119038	3.80816	0.000140004	0.00335132	AFF3
ENSG00000285437	1635.98	0.453303	0.126856	3.57337	0.000352421	0.00635255	POLR2J3
ENSG00000232472	396.691	0.452553	0.0944604	4.79093	1.6601e-06	0.000150746	EEF1B2P3
ENSG00000213057	42.4631	0.452301	0.219528	2.06033	0.0393672	0.154482	C1orf220
ENSG00000213967	28.2229	0.452132	0.190531	2.37301	0.017644	0.0897064	ZNF726
ENSG00000242970	217.419	0.45206	0.186911	2.41858	0.0155812	0.0826986
ENSG00000139173	25.8756	0.452002	0.227144	1.98994	0.046598	0.173038	TMEM117
ENSG00000186615	34.0549	0.451676	0.193022	2.34003	0.0192824	0.0953808	KTN1-AS1
ENSG00000184226	527.928	0.451061	0.179914	2.5071	0.0121726	0.0692798	PCDH9
ENSG00000073060	321.224	0.450625	0.153365	2.93825	0.00330073	0.0284044	SCARB1
ENSG00000267128	92.8084	0.450276	0.154992	2.90516	0.0036706	0.0304639	RNF157-AS1
ENSG00000101846	113.861	0.449821	0.15282	2.94348	0.00324547	0.0280818	STS
ENSG00000172878	157.052	0.449642	0.105392	4.26635	1.98694e-05	0.00086261	METAP1D
ENSG00000257596	19.0007	0.448614	0.231136	1.94091	0.0522692	0.18721	SCAT2
ENSG00000250365	28.4753	0.448301	0.17548	2.55472	0.0106274	0.0633827
ENSG00000101049	19.8076	0.448181	0.223817	2.00244	0.0452372	0.169556	SGK2
ENSG00000140905	55.2734	0.447547	0.177693	2.51866	0.0117804	0.0677507	GCSH
ENSG00000136895	15.0884	0.446894	0.233894	1.91067	0.0560473	0.195791	GARNL3
ENSG00000120254	721.959	0.444396	0.133964	3.31727	0.000909005	0.0117545	MTHFD1L
ENSG00000147180	316.892	0.443732	0.107435	4.13023	3.62402e-05	0.00132231	ZNF711
ENSG00000109944	44.9688	0.442838	0.183512	2.41312	0.0158166	0.0834992	JHY
ENSG00000226979	355.121	0.442488	0.206973	2.13791	0.0325244	0.136112	LTA
ENSG00000186481	49.851	0.441887	0.171948	2.56989	0.0101731	0.0614922	ANKRD20A5P
ENSG00000239264	30.2668	0.441581	0.207053	2.1327	0.0329493	0.137412	TXNDC5
ENSG00000267571	18.3528	0.441513	0.223071	1.97925	0.0477882	0.175772
ENSG00000092096	49.092	0.441035	0.22654	1.94683	0.0515546	0.185213	SLC22A17
ENSG00000232630	38.5544	0.440782	0.152919	2.88246	0.00394579	0.0320513	PRPS1P2
ENSG00000178429	511.159	0.440765	0.171389	2.57173	0.0101192	0.0612585	RPS3AP5
ENSG00000138185	666.384	0.439751	0.152618	2.88139	0.00395922	0.0321033	ENTPD1
ENSG00000130590	387.719	0.438538	0.167817	2.61319	0.00897009	0.0562669	SAMD10
ENSG00000104549	1287.55	0.437438	0.111457	3.92474	8.68231e-05	0.00240991	SQLE
ENSG00000113356	100.349	0.437237	0.127688	3.42425	0.000616495	0.00919838	POLR3G
ENSG00000113231	31.896	0.435919	0.222675	1.95764	0.0502717	0.182025	PDE8B
ENSG00000127561	71.0206	0.435891	0.189719	2.29756	0.0215868	0.103119	SYNGR3
ENSG00000181097	26.1277	0.43541	0.205952	2.11413	0.0345038	0.141797
ENSG00000137720	75.85	0.435383	0.134056	3.24777	0.00116312	0.0141037	C11orf1
ENSG00000228343	94.5342	0.434635	0.126248	3.44271	0.000575907	0.00882911
ENSG00000236901	469.102	0.433748	0.0992019	4.37237	1.22905e-05	0.000613544	MIR600HG
ENSG00000275395	5459.81	0.433528	0.185103	2.3421	0.0191758	0.0949938	FCGBP
ENSG00000197705	305.989	0.433306	0.15655	2.76784	0.00564285	0.0409255	KLHL14
ENSG00000212916	92.7404	0.431987	0.146196	2.95485	0.00312822	0.027414	MAP10
ENSG00000273373	210.696	0.431529	0.125403	3.44114	0.000579278	0.00886048
ENSG00000279981	25.5723	0.43098	0.203491	2.11794	0.0341805	0.140965
ENSG00000138166	2057.15	0.43091	0.225831	1.9081	0.0563777	0.196558	DUSP5
ENSG00000137265	3091.26	0.430711	0.146338	2.94325	0.00324785	0.0280818	IRF4
ENSG00000225071	1079.88	0.430634	0.206374	2.08666	0.0369186	0.148147
ENSG00000078081	1753.64	0.430359	0.203475	2.11504	0.0344263	0.141542	LAMP3
ENSG00000029534	155.943	0.42995	0.174262	2.46726	0.0136151	0.075042	ANK1
ENSG00000212719	144.804	0.429935	0.14377	2.99043	0.00278582	0.0254696	C17orf51
ENSG00000236304	42.8848	0.429821	0.215953	1.99035	0.0465527	0.17294
ENSG00000203497	150.631	0.429471	0.0894755	4.79987	1.58772e-06	0.000146158	PDCD4-AS1
ENSG00000112290	159.172	0.429201	0.119274	3.59843	0.00032014	0.00599706	WASF1
ENSG00000185483	196.704	0.42847	0.202506	2.11584	0.0343581	0.14129	ROR1
ENSG00000245532	28305.9	0.428469	0.157942	2.71283	0.00667117	0.0456918	NEAT1
ENSG00000129422	250.455	0.428466	0.192352	2.22751	0.025913	0.116667	MTUS1
ENSG00000101194	719.169	0.427819	0.152757	2.80066	0.00509986	0.0381027	SLC17A9
ENSG00000176293	132.905	0.427168	0.133296	3.20465	0.00135228	0.0156412	ZNF135
ENSG00000103056	220.155	0.425328	0.121846	3.4907	0.000481766	0.007903	SMPD3
ENSG00000149548	46.5685	0.423739	0.209638	2.02129	0.0432493	0.164442	CCDC15
ENSG00000185386	267.127	0.423631	0.152956	2.76963	0.00561197	0.04079	MAPK11
ENSG00000131398	366.573	0.423278	0.191238	2.21336	0.026873	0.119709	KCNC3
ENSG00000274292	38.7326	0.423272	0.191791	2.20694	0.0273182	0.12102
ENSG00000083454	670.303	0.422597	0.127799	3.30672	0.000943956	0.0121121	P2RX5
ENSG00000224934	50.4346	0.422107	0.205098	2.05807	0.0395836	0.155143
ENSG00000152894	393.716	0.422082	0.133243	3.16776	0.00153619	0.0169293	PTPRK
ENSG00000271856	869.833	0.421174	0.0991862	4.2463	2.17334e-05	0.000926	LINC01215
ENSG00000157657	106.955	0.421113	0.196007	2.14846	0.0316776	0.133826	ZNF618
ENSG00000228981	40.3819	0.421104	0.209119	2.0137	0.044041	0.166517
ENSG00000176533	714.694	0.421009	0.150796	2.79191	0.00523983	0.0388161	GNG7
ENSG00000143412	77.7961	0.420442	0.195812	2.14718	0.0317793	0.134009	ANXA9
ENSG00000141682	754.005	0.418587	0.176292	2.3744	0.0175775	0.0894996	PMAIP1
ENSG00000276550	3512.23	0.41801	0.135878	3.07636	0.00209544	0.0209708	HERC2P2
ENSG00000218208	58.2687	0.417357	0.18217	2.29104	0.0219612	0.104262	RPS27AP11
ENSG00000124920	84.3427	0.416723	0.203536	2.04741	0.0406176	0.157642	MYRF
ENSG00000236017	199.336	0.416407	0.097301	4.27957	1.87252e-05	0.000829532	ASMTL-AS1
ENSG00000092621	281.431	0.416116	0.164882	2.52371	0.0116122	0.0670601	PHGDH
ENSG00000249626	70.5155	0.415773	0.13925	2.98579	0.00282846	0.0257182
ENSG00000282951	40.4063	0.415671	0.185212	2.2443	0.0248134	0.11349
ENSG00000217930	267.907	0.415263	0.0900282	4.61259	3.97673e-06	0.000278247	PAM16
ENSG00000180817	1330.87	0.413782	0.0911479	4.53968	5.63397e-06	0.000367086	PPA1
ENSG00000196993	283.138	0.41344	0.108765	3.80121	0.00014399	0.00339155	NPIPB9
ENSG00000104427	53.7817	0.413033	0.181787	2.27208	0.0230819	0.107879	ZC2HC1A
ENSG00000073711	65.121	0.412016	0.151964	2.71127	0.00670267	0.0458138	PPP2R3A
ENSG00000129993	228.966	0.411591	0.146659	2.80646	0.00500895	0.0376932	CBFA2T3
ENSG00000108797	122.87	0.41155	0.166477	2.47212	0.0134315	0.0743399	CNTNAP1
ENSG00000107242	99.7643	0.411463	0.165092	2.49232	0.0126912	0.0715011	PIP5K1B
ENSG00000007516	191.617	0.411434	0.207281	1.98491	0.0471543	0.174333	BAIAP3
ENSG00000279452	21.1545	0.410888	0.203424	2.01986	0.0433982	0.164759
ENSG00000173585	80.0992	0.410806	0.159644	2.57327	0.0100743	0.0611005	CCR9
ENSG00000214309	20.0957	0.410374	0.198049	2.07209	0.0382573	0.151609	MBLAC1
ENSG00000026103	829.846	0.409008	0.211854	1.93061	0.0535308	0.190505	FAS
ENSG00000212123	35.9852	0.408485	0.192415	2.12294	0.0337591	0.139888	PRR22
ENSG00000281106	50.0066	0.408304	0.191307	2.13428	0.0328197	0.136985	TMEM272
ENSG00000160097	33.5495	0.408015	0.207655	1.96487	0.0494292	0.180026	FNDC5
ENSG00000232354	49.1627	0.407527	0.194127	2.09928	0.0357921	0.145312	VIPR1-AS1
ENSG00000257108	42.5378	0.407286	0.158178	2.57486	0.010028	0.0609087	NHLRC4
ENSG00000269954	223.803	0.406049	0.196545	2.06594	0.0388345	0.15317
ENSG00000214389	2014.04	0.405468	0.176743	2.29411	0.0217845	0.103693	RPS3AP26
ENSG00000169683	342.957	0.404976	0.129108	3.13672	0.00170847	0.018237	LRRC45
ENSG00000102221	237.659	0.404068	0.143292	2.81988	0.00480409	0.0365322	JADE3
ENSG00000136636	109.943	0.403467	0.131258	3.07384	0.0021132	0.0210879	KCTD3
ENSG00000277462	57.9577	0.403427	0.154985	2.603	0.00924107	0.0573792	ZNF670
ENSG00000167550	54.2084	0.403312	0.171918	2.34595	0.0189785	0.0944594	RHEBL1
ENSG00000116133	359.279	0.402893	0.150621	2.67487	0.00747575	0.0495018	DHCR24
ENSG00000151655	42.8911	0.402802	0.186265	2.16253	0.0305777	0.131034	ITIH2
ENSG00000196796	227.892	0.402448	0.17572	2.29028	0.022005	0.104317	NPIPB10P
ENSG00000270231	5676.04	0.402117	0.131099	3.06726	0.00216028	0.0213782	NBPF8
ENSG00000091972	244.144	0.402114	0.117636	3.41829	0.000630159	0.00936049	CD200
ENSG00000198298	135.751	0.401897	0.102519	3.92021	8.84724e-05	0.00243882	ZNF485
ENSG00000205482	97.7289	0.400986	0.166164	2.41319	0.0158135	0.0834992	SPDYE18
ENSG00000228049	434.471	0.400884	0.144585	2.77266	0.00555996	0.0405735	POLR2J2
ENSG00000133740	459.453	0.400743	0.113035	3.5453	0.000392159	0.00683176	E2F5
ENSG00000137747	77.3185	0.399985	0.167558	2.38715	0.0169796	0.0874156	TMPRSS13
ENSG00000196724	262.751	0.399717	0.131129	3.04827	0.0023016	0.0222488	ZNF418
ENSG00000255182	32.2898	0.399431	0.198892	2.00828	0.0446134	0.167785
ENSG00000173200	2934.05	0.399179	0.109759	3.63688	0.000275958	0.0053934	PARP15
ENSG00000173207	216.253	0.398334	0.0785632	5.07024	3.97321e-07	5.4232e-05	CKS1B
ENSG00000242951	34.0772	0.398327	0.174519	2.28243	0.0224641	0.105891
ENSG00000269911	125.851	0.398145	0.13988	2.84633	0.00442268	0.0347365	FAM226B
ENSG00000072195	188.415	0.397899	0.135855	2.92884	0.00340229	0.0289358	SPEG
ENSG00000163600	1173.51	0.397638	0.121176	3.2815	0.00103256	0.012991	ICOS
ENSG00000229417	61.563	0.397165	0.154684	2.56758	0.0102411	0.0617364	NPM1P25
ENSG00000234171	86.562	0.396713	0.129404	3.0657	0.0021716	0.0214467	RNASEH1-AS1
ENSG00000102934	117.487	0.396179	0.145932	2.71482	0.0066312	0.0455424	PLLP
ENSG00000179583	2707.61	0.39542	0.135524	2.91772	0.00352606	0.0295947	CIITA
ENSG00000088899	285.14	0.395169	0.114228	3.45947	0.000541235	0.00851215	LZTS3
ENSG00000076604	1211.79	0.394997	0.118989	3.31961	0.000901427	0.0117238	TRAF4
ENSG00000145882	645.183	0.394874	0.0921236	4.28635	1.8163e-05	0.000813606	PCYOX1L
ENSG00000241489	41.9877	0.394859	0.201498	1.95962	0.0500404	0.181462
ENSG00000144645	326.283	0.394751	0.19627	2.01126	0.0442975	0.167036	OSBPL10
ENSG00000205593	132.763	0.39475	0.15183	2.59994	0.00932394	0.0577331	DENND6B
ENSG00000251417	31.9581	0.394254	0.190973	2.06445	0.0389754	0.15339
ENSG00000161381	311.781	0.393968	0.141654	2.7812	0.00541582	0.0397966	PLXDC1
ENSG00000170456	509.379	0.393799	0.144551	2.72429	0.00644404	0.044778	DENND5B
ENSG00000096092	80.3121	0.393254	0.135841	2.89494	0.00379226	0.0311387	TMEM14A
ENSG00000172058	408.185	0.393083	0.14533	2.70476	0.00683533	0.0464358	SERF1A
ENSG00000177548	1075.03	0.39291	0.106618	3.68523	0.0002285	0.00471279	RABEP2
ENSG00000256092	36.3678	0.392821	0.200837	1.95592	0.0504747	0.182554
ENSG00000244625	158.675	0.392277	0.10013	3.9177	8.93988e-05	0.00245089	MIATNB
ENSG00000279058	243.754	0.391738	0.160153	2.44602	0.0144444	0.0780898	AGAP14P
ENSG00000012124	1653.78	0.391687	0.145653	2.68918	0.00716286	0.0479399	CD22
ENSG00000162591	1336.4	0.39165	0.134102	2.92054	0.0034942	0.0294134	MEGF6
ENSG00000186603	30.2178	0.391022	0.2033	1.92337	0.054433	0.192487	HPDL
ENSG00000204228	169.546	0.390821	0.132597	2.94744	0.00320416	0.0279085	HSD17B8
ENSG00000165507	78.0086	0.390426	0.182426	2.14019	0.0323393	0.135601	DEPP1
ENSG00000198673	86.9326	0.390267	0.20438	1.90952	0.0561952	0.196158	FAM19A2
ENSG00000124191	131.228	0.389893	0.187346	2.08114	0.0374208	0.149296	TOX2
ENSG00000110013	239.502	0.389101	0.0775153	5.01966	5.17625e-07	6.33408e-05	SIAE
ENSG00000175449	32.673	0.388784	0.15906	2.44426	0.0145148	0.0783019	RFESD
ENSG00000135960	257.303	0.388326	0.119098	3.26055	0.00111196	0.0137069	EDAR
ENSG00000152492	1633.2	0.388218	0.116353	3.33656	0.000848212	0.0112914	CCDC50
ENSG00000164061	52.6189	0.388046	0.153192	2.53307	0.0113067	0.0659388	BSN
ENSG00000198899	34922.4	0.387405	0.0662908	5.84402	5.09544e-09	2.69093e-06	MT-ATP6
ENSG00000261326	244.153	0.387272	0.162951	2.37661	0.0174724	0.0892433	LINC01355
ENSG00000213881	102.956	0.386796	0.176523	2.19119	0.028438	0.124307	NPM1P6
ENSG00000276141	500.716	0.385617	0.134738	2.86197	0.00421013	0.0334609	WHAMMP3
ENSG00000260686	59.9816	0.385352	0.165036	2.33496	0.0195454	0.096231
ENSG00000160293	648.339	0.385269	0.124414	3.09666	0.00195717	0.019988	VAV2
ENSG00000242612	99.4871	0.384838	0.11467	3.35606	0.000790612	0.0107904	DECR2
ENSG00000167700	172.61	0.384755	0.137657	2.79503	0.00518946	0.0385569	MFSD3
ENSG00000235750	2657.91	0.384642	0.131916	2.9158	0.00354773	0.029684	KIAA0040
ENSG00000267809	44.9726	0.384622	0.195647	1.9659	0.0493104	0.179692	NDUFV2P1
ENSG00000285796	76.6193	0.384573	0.142754	2.69395	0.00706116	0.04744
ENSG00000247373	77.1039	0.384481	0.128024	3.00321	0.00267152	0.0247631
ENSG00000005471	195.635	0.384168	0.169742	2.26325	0.0236203	0.109624	ABCB4
ENSG00000130332	879.969	0.383602	0.0905557	4.23609	2.27442e-05	0.000958889	LSM7
ENSG00000231389	4209.23	0.383413	0.194333	1.97297	0.0484994	0.177523	HLA-DPA1
ENSG00000239827	29.9445	0.383404	0.175839	2.18042	0.029226	0.126812	SUGT1P3
ENSG00000152217	499.183	0.383104	0.162447	2.35833	0.0183573	0.0921447	SETBP1
ENSG00000203872	44.3874	0.382401	0.166678	2.29425	0.0217762	0.103678	C6orf163
ENSG00000189343	1950.94	0.382366	0.146172	2.61587	0.00890013	0.0559548	RPS2P46
ENSG00000173926	416.355	0.381877	0.137241	2.78253	0.00539364	0.0396773	44258
ENSG00000073111	301.161	0.381776	0.103557	3.68664	0.000227239	0.00471098	MCM2
ENSG00000224078	591.101	0.381661	0.123292	3.09557	0.00196432	0.0200509	SNHG14
ENSG00000105202	2382.05	0.38027	0.0789437	4.81698	1.45748e-06	0.000138029	FBL
ENSG00000184178	200.52	0.380172	0.0991808	3.83312	0.00012653	0.00311322	SCFD2
ENSG00000173114	3932.44	0.380157	0.149764	2.53837	0.011137	0.0653884	LRRN3
ENSG00000188277	108.881	0.378606	0.129029	2.93426	0.00334339	0.0285876	C15orf62
ENSG00000272455	44.7983	0.378517	0.17949	2.10885	0.0349574	0.142964
ENSG00000198838	75.6844	0.377749	0.133839	2.82242	0.00476621	0.0363682	RYR3
ENSG00000236308	20.3474	0.377739	0.198574	1.90226	0.0571375	0.19862
ENSG00000071242	421.131	0.377728	0.142612	2.64864	0.00808153	0.0523838	RPS6KA2
ENSG00000114942	6428.79	0.377715	0.0843987	4.47536	7.62812e-06	0.000448918	EEF1B2
ENSG00000280351	73.3446	0.37715	0.159863	2.35921	0.0183138	0.0919955
ENSG00000034053	2198.66	0.376863	0.110032	3.42504	0.000614707	0.00919112	APBA2
ENSG00000101605	69.2636	0.376668	0.16787	2.24381	0.0248444	0.113571	MYOM1
ENSG00000186073	87.9218	0.376208	0.112223	3.35233	0.000801331	0.0108951	C15orf41
ENSG00000280063	220.752	0.375858	0.112229	3.34903	0.00081095	0.010996
ENSG00000152642	240.804	0.375757	0.0928955	4.04495	5.23352e-05	0.00170743	GPD1L
ENSG00000160226	213.267	0.374604	0.125833	2.977	0.00291084	0.026113	CFAP410
ENSG00000188848	278.475	0.374247	0.137531	2.72117	0.0065051	0.0449909	BEND4
ENSG00000053372	702.679	0.374233	0.0898224	4.16636	3.09504e-05	0.00118082	MRTO4
ENSG00000165271	1459.79	0.373394	0.0635213	5.87824	4.1465e-09	2.52158e-06	NOL6
ENSG00000161835	298.091	0.373175	0.162774	2.29259	0.0218717	0.103949	GRASP
ENSG00000157992	79.3032	0.373068	0.121708	3.06526	0.00217481	0.0214601	KRTCAP3
ENSG00000181652	74.693	0.372884	0.165362	2.25495	0.0241364	0.111247	ATG9B
ENSG00000006757	105.399	0.372054	0.135096	2.754	0.0058871	0.042066	PNPLA4
ENSG00000142632	157.321	0.371614	0.120901	3.0737	0.00211425	0.0210879	ARHGEF19
ENSG00000213442	2040.07	0.371418	0.164004	2.26469	0.0235314	0.109372	RPL18AP3
ENSG00000167676	43.0291	0.37101	0.184805	2.00758	0.0446881	0.167824	PLIN4
ENSG00000110660	283.696	0.370908	0.14991	2.47421	0.0133533	0.0740054	SLC35F2
ENSG00000184613	3960.88	0.37077	0.118431	3.13069	0.00174397	0.0185466	NELL2
ENSG00000234981	67.789	0.370751	0.130375	2.84372	0.00445898	0.0348861
ENSG00000112293	33.6467	0.370735	0.183933	2.0156	0.0438415	0.166048	GPLD1
ENSG00000205572	427.452	0.370274	0.126679	2.92292	0.00346763	0.0292757	SERF1B
ENSG00000228801	26.6081	0.370271	0.18434	2.00863	0.0445764	0.167677
ENSG00000181513	448.275	0.370139	0.0600676	6.16205	7.18085e-10	5.76421e-07	ACBD4
ENSG00000164236	743.891	0.36979	0.156432	2.36391	0.0180831	0.0912106	ANKRD33B
ENSG00000133056	1611.08	0.369545	0.120847	3.05796	0.00222847	0.0218315	PIK3C2B
ENSG00000234354	1188.31	0.369061	0.179434	2.05681	0.0397046	0.155411	RPS26P47
ENSG00000225178	4159.82	0.368923	0.131826	2.79855	0.00513319	0.038309	RPSAP58
ENSG00000164346	1572.86	0.368432	0.0829858	4.4397	9.00834e-06	0.000497555	NSA2
ENSG00000255524	305.796	0.368309	0.138565	2.65801	0.00786027	0.0514313	NPIPB8
ENSG00000143942	91.8405	0.368243	0.106328	3.46329	0.000533614	0.00841869	CHAC2
ENSG00000116106	726.762	0.367994	0.145779	2.52433	0.0115919	0.0669812	EPHA4
ENSG00000183281	152.43	0.367698	0.184387	1.99416	0.0461344	0.171927	PLGLB1
ENSG00000112599	58.6781	0.367112	0.155115	2.36671	0.0179472	0.0907946	GUCA1B
ENSG00000117242	79.1291	0.367096	0.149813	2.45035	0.0142716	0.0774269	PINK1-AS
ENSG00000077782	217.264	0.367056	0.155363	2.36258	0.0181484	0.0914391	FGFR1
ENSG00000259972	149.097	0.36643	0.147374	2.48639	0.0129047	0.0723585
ENSG00000249592	103.278	0.365992	0.120393	3.03997	0.00236605	0.0226212
ENSG00000230457	86.6688	0.365517	0.113257	3.22733	0.00124949	0.0148022	PA2G4P4
ENSG00000267454	57.3113	0.364424	0.143092	2.54679	0.0108719	0.0643055	ZNF582-AS1
ENSG00000204311	42.0587	0.364279	0.181084	2.01165	0.0442566	0.166985	PJVK
ENSG00000271964	59.9989	0.364004	0.146748	2.48047	0.0131208	0.0731803
ENSG00000235174	1473.4	0.363074	0.132765	2.73471	0.00624352	0.0437635	RPL39P3
ENSG00000128165	118.905	0.362388	0.171485	2.11323	0.0345811	0.141859	ADM2
ENSG00000268970	63.5613	0.36196	0.133222	2.71698	0.00658808	0.0453842
ENSG00000152763	34.465	0.361242	0.179924	2.00775	0.0446701	0.167824	WDR78
ENSG00000259562	30.7744	0.360981	0.180333	2.00174	0.0453122	0.169777
ENSG00000211900	132.683	0.360428	0.170012	2.12001	0.034005	0.140479	IGHJ6
ENSG00000160072	1335.5	0.360357	0.0772969	4.66198	3.13175e-06	0.000238966	ATAD3B
ENSG00000273271	39.0947	0.360326	0.171897	2.09617	0.036067	0.145896
ENSG00000214113	344.823	0.359639	0.118015	3.04739	0.0023084	0.022293	LYRM4
ENSG00000242472	124.204	0.359628	0.182593	1.96956	0.0488887	0.178461	IGHJ5
ENSG00000215790	2094.99	0.359388	0.0944783	3.80392	0.000142426	0.0033745	SLC35E2A
ENSG00000196782	237.471	0.359171	0.100959	3.5576	0.000374264	0.00661156	MAML3
ENSG00000198945	728.224	0.358445	0.123533	2.90162	0.00371234	0.0307087	L3MBTL3
ENSG00000018699	529.098	0.358178	0.0679645	5.27007	1.36373e-07	2.40065e-05	TTC27
ENSG00000168734	411.31	0.357564	0.126783	2.82028	0.00479816	0.0365286	PKIG
ENSG00000091409	2663.29	0.357429	0.105651	3.3831	0.00071672	0.0101005	ITGA6
ENSG00000277149	175.092	0.356652	0.187603	1.9011	0.0572889	0.198876	TYW1B
ENSG00000281398	253.489	0.356462	0.111685	3.19168	0.00141449	0.0161284	SNHG4
ENSG00000101444	872.403	0.356276	0.0786464	4.5301	5.89565e-06	0.000377279	AHCY
ENSG00000145425	9014.63	0.355266	0.0777519	4.56922	4.89541e-06	0.000324228	RPS3A
ENSG00000110841	235.682	0.354961	0.170055	2.08734	0.0368577	0.148084	PPFIBP1
ENSG00000233527	71.3231	0.354936	0.123883	2.86509	0.00416887	0.0332656	ZNF529-AS1
ENSG00000213598	57.5949	0.354018	0.126568	2.79706	0.00515704	0.0384298
ENSG00000158457	1226.11	0.354008	0.141351	2.50447	0.0122636	0.0695803	TSPAN33
ENSG00000198786	62263.1	0.353979	0.0561799	6.30081	2.96093e-10	3.12736e-07	MT-ND5
ENSG00000152454	206.126	0.353958	0.0853447	4.1474	3.36273e-05	0.00125434	ZNF256
ENSG00000049249	358.051	0.353496	0.186199	1.89848	0.0576328	0.19972	TNFRSF9
ENSG00000180574	187.658	0.352977	0.113148	3.11961	0.00181089	0.018937	EIF2S3B
ENSG00000169660	1854.47	0.352903	0.0872528	4.04461	5.24107e-05	0.00170743	HEXD
ENSG00000170684	123.836	0.352766	0.153518	2.29789	0.0215681	0.103055	ZNF296
ENSG00000266967	64.1922	0.352172	0.121342	2.90232	0.00370415	0.0306536	AARSD1
ENSG00000211945	364.967	0.35203	0.16469	2.13753	0.032555	0.136164	IGHV1-18
ENSG00000176401	54.3737	0.351899	0.158602	2.21876	0.026503	0.118508	EID2B
ENSG00000064886	691.121	0.351807	0.152521	2.3066	0.0210769	0.101408	CHI3L2
ENSG00000081189	984.498	0.351765	0.139558	2.52057	0.0117165	0.0675652	MEF2C
ENSG00000233954	102.246	0.351523	0.102504	3.42936	0.000605005	0.00913562	UQCRHL
ENSG00000136828	275.873	0.350644	0.0970011	3.61485	0.000300521	0.00576013	RALGPS1
ENSG00000279672	88.9514	0.350643	0.171983	2.03882	0.0414676	0.159941
ENSG00000237940	171.368	0.350059	0.127168	2.75274	0.00590993	0.0421916	LINC01238
ENSG00000196700	996.199	0.349992	0.0751142	4.65947	3.17022e-06	0.000240075	ZNF512B
ENSG00000165661	2038.33	0.349868	0.0833387	4.19814	2.69115e-05	0.00106785	QSOX2
ENSG00000167775	295.828	0.349812	0.0983887	3.55541	0.000377397	0.00664934	CD320
ENSG00000132182	6822.58	0.349415	0.0579037	6.03442	1.59533e-09	1.1434e-06	NUP210
ENSG00000267470	37.3745	0.349261	0.158703	2.20072	0.0277562	0.12242	ZNF571-AS1
ENSG00000141384	832.494	0.348975	0.108795	3.20764	0.00133827	0.015515	TAF4B
ENSG00000126602	807.192	0.348462	0.0689388	5.05466	4.31163e-07	5.69249e-05	TRAP1
ENSG00000161048	450.661	0.348274	0.0791316	4.4012	1.07656e-05	0.000568538	NAPEPLD
ENSG00000119771	60.6567	0.348178	0.155471	2.23951	0.0251229	0.114401	KLHL29
ENSG00000197299	375.064	0.3478	0.11397	3.05169	0.00227554	0.0220927	BLM
ENSG00000107833	256.901	0.346202	0.0986993	3.50765	0.000452092	0.00755183	NPM3
ENSG00000198727	44838.3	0.345476	0.0948699	3.64157	0.000270978	0.00532615	MT-CYB
ENSG00000168916	275.572	0.345426	0.134471	2.56877	0.0102061	0.061599	ZNF608
ENSG00000253785	48.7647	0.34522	0.180993	1.90737	0.0564733	0.196823
ENSG00000170667	823.533	0.344463	0.11539	2.98521	0.00283382	0.0257326	RASA4B
ENSG00000158966	253.281	0.344139	0.161234	2.13441	0.0328092	0.13697	CACHD1
ENSG00000259321	40.6379	0.344136	0.169173	2.03423	0.0419287	0.16092
ENSG00000163170	83.6998	0.343967	0.137332	2.50463	0.012258	0.0695803	BOLA3
ENSG00000183691	1045.68	0.343913	0.1254	2.74254	0.00609669	0.043126	NOG
ENSG00000233806	61.3718	0.343583	0.148787	2.30922	0.0209312	0.100876	LINC01237
ENSG00000196388	97.44	0.343474	0.105612	3.25221	0.0011451	0.0139736	INCA1
ENSG00000166965	286.603	0.343228	0.115672	2.96725	0.00300477	0.0267404	RCCD1
ENSG00000278970	492.321	0.343139	0.139024	2.46821	0.013579	0.0749254	HEIH
ENSG00000105808	1947.04	0.342964	0.11305	3.03375	0.00241535	0.0230158	RASA4
ENSG00000232573	1391.54	0.342946	0.115947	2.95779	0.00309853	0.0272366	RPL3P4
ENSG00000225200	51.9155	0.342835	0.137981	2.48465	0.0129679	0.0726522
ENSG00000165985	47.4554	0.341875	0.147697	2.31471	0.0206288	0.0999709	C1QL3
ENSG00000070190	1351.01	0.341863	0.0980117	3.48798	0.000486689	0.00795348	DAPP1
ENSG00000214544	311.533	0.341838	0.175932	1.94301	0.0520144	0.186564	GTF2IRD2P1
ENSG00000204623	355.762	0.341367	0.0843497	4.04705	5.1867e-05	0.00170076	ZNRD1ASP
ENSG00000198467	509.996	0.341356	0.134764	2.53298	0.0113096	0.0659388	TPM2
ENSG00000240024	50.0683	0.34107	0.158326	2.15423	0.0312223	0.132719	LINC00888
ENSG00000198888	44813.9	0.341033	0.0801844	4.25311	2.10825e-05	0.000904023	MT-ND1
ENSG00000161551	337.878	0.340961	0.149856	2.27526	0.0228904	0.107253	ZNF577
ENSG00000223496	853.392	0.340921	0.0713748	4.77649	1.78385e-06	0.000157399	EXOSC6
ENSG00000177425	529.66	0.340702	0.0977519	3.48538	0.000491442	0.00799903	PAWR
ENSG00000187699	76.8787	0.340009	0.171906	1.97788	0.0479427	0.176082	C2orf88
ENSG00000182871	356.09	0.33944	0.174512	1.94509	0.0517645	0.185734	COL18A1
ENSG00000137942	111.521	0.338966	0.165273	2.05095	0.0402719	0.156656	FNBP1L
ENSG00000171033	492.606	0.338396	0.142068	2.38193	0.0172222	0.0883022	PKIA
ENSG00000213553	1626.06	0.338165	0.101379	3.33566	0.000850981	0.0113021	RPLP0P6
ENSG00000236871	172.49	0.337858	0.107009	3.15728	0.00159248	0.0173308	LINC00106
ENSG00000128872	979.587	0.337722	0.0635442	5.31475	1.06802e-07	2.13031e-05	TMOD2
ENSG00000261468	108.604	0.337459	0.117452	2.87316	0.00406383	0.0326734
ENSG00000273136	2531.56	0.336974	0.112871	2.98547	0.00283142	0.0257225	NBPF26
ENSG00000079150	34.4787	0.336539	0.165624	2.03195	0.0421588	0.161585	FKBP7
ENSG00000151552	195.695	0.336428	0.086696	3.88055	0.00010422	0.00272683	QDPR
ENSG00000170629	121.035	0.336362	0.127207	2.64422	0.00818791	0.0528514	DPY19L2P2
ENSG00000215417	123.277	0.336349	0.140777	2.38924	0.0168834	0.0870545	MIR17HG
ENSG00000166347	536.694	0.335826	0.11504	2.9192	0.00350936	0.0295039	CYB5A
ENSG00000269086	131.925	0.335532	0.164462	2.04018	0.0413323	0.159594
ENSG00000146859	960.533	0.334869	0.151039	2.2171	0.0266164	0.118856	TMEM140
ENSG00000165209	1259.21	0.33239	0.0868706	3.82627	0.000130099	0.00316686	STRBP
ENSG00000279425	56.7013	0.33227	0.143675	2.31266	0.0207415	0.100294
ENSG00000103257	2001.12	0.332086	0.172707	1.92283	0.0545013	0.19266	SLC7A5
ENSG00000140092	164.139	0.331548	0.133652	2.48068	0.0131134	0.0731803	FBLN5
ENSG00000133131	184.084	0.331166	0.137651	2.40584	0.0161354	0.084412	MORC4
ENSG00000164976	34.2655	0.331113	0.161647	2.04837	0.0405235	0.157388	MYORG
ENSG00000046653	144.159	0.330828	0.125598	2.63402	0.00843811	0.0538761	GPM6B
ENSG00000021300	198.998	0.330692	0.10971	3.01425	0.00257617	0.0241015	PLEKHB1
ENSG00000204475	49.2551	0.328493	0.160805	2.0428	0.0410719	0.158964	NCR3
ENSG00000160325	180.615	0.328269	0.0982768	3.34025	0.000837022	0.0111982	CACFD1
ENSG00000116771	188.976	0.328033	0.107155	3.06129	0.00220387	0.0216555	AGMAT
ENSG00000145331	124.261	0.327756	0.106831	3.06799	0.00215502	0.0213525	TRMT10A
ENSG00000162572	136.478	0.327605	0.129515	2.52947	0.0114235	0.0664134	SCNN1D
ENSG00000126353	14561.2	0.327533	0.0865632	3.78375	0.000154486	0.00355838	CCR7
ENSG00000166086	158.3	0.327452	0.111962	2.92466	0.00344833	0.0291988	JAM3
ENSG00000109084	117.907	0.327409	0.104888	3.12151	0.00179925	0.0188651	TMEM97
ENSG00000130741	5181.17	0.327362	0.0744286	4.39834	1.09082e-05	0.000569587	EIF2S3
ENSG00000117016	152.83	0.327276	0.160821	2.03504	0.0418467	0.160754	RIMS3
ENSG00000177854	106.801	0.326676	0.130423	2.50473	0.0122544	0.0695803	TMEM187
ENSG00000203772	115.835	0.325961	0.109336	2.98129	0.00287037	0.0258888	SPRN
ENSG00000182183	372.114	0.32467	0.0823727	3.94147	8.09833e-05	0.00230194	SHISAL2A
ENSG00000273148	59.6037	0.324312	0.165965	1.9541	0.0506891	0.183087
ENSG00000204681	1730.7	0.324193	0.113723	2.85073	0.0043619	0.0343412	GABBR1
ENSG00000151692	988.25	0.324188	0.103014	3.14702	0.00164944	0.0178058	RNF144A
ENSG00000196296	40.3487	0.323416	0.157657	2.05139	0.0402291	0.156548	ATP2A1
ENSG00000234912	213.624	0.322802	0.0812019	3.9753	7.02903e-05	0.00206926	SNHG20
ENSG00000121413	353.144	0.321402	0.106015	3.03167	0.00243204	0.023098	ZSCAN18
ENSG00000073536	336.75	0.321398	0.0765046	4.20103	2.65709e-05	0.00106529	NLE1
ENSG00000167535	104.341	0.320669	0.137811	2.32687	0.0199719	0.0977791	CACNB3
ENSG00000105640	14469.2	0.318733	0.0742552	4.2924	1.76749e-05	0.000801605	RPL18A
ENSG00000260233	73.2979	0.318588	0.151956	2.09658	0.0360309	0.145809	SSSCA1-AS1
ENSG00000165060	124.713	0.318423	0.120265	2.64769	0.00810438	0.0524464	FXN
ENSG00000163617	318.402	0.318014	0.0953304	3.33591	0.000850209	0.0112993	CCDC191
ENSG00000172057	2244.72	0.317864	0.107644	2.95291	0.00314797	0.0275386	ORMDL3
ENSG00000240489	112.834	0.317713	0.114254	2.78077	0.00542302	0.0398204	SETP14
ENSG00000106624	641.761	0.317661	0.10003	3.17566	0.00149495	0.0166856	AEBP1
ENSG00000274114	104.198	0.317623	0.113666	2.79434	0.00520052	0.0386247	ALOX15P1
ENSG00000245149	72.61	0.317595	0.141709	2.24118	0.0250142	0.114139	RNF139-AS1
ENSG00000166432	731.092	0.317498	0.0879259	3.61098	0.000305047	0.00582462	ZMAT1
ENSG00000232021	160.523	0.317417	0.123105	2.57843	0.00992512	0.0605078	LEF1-AS1
ENSG00000205571	1157.56	0.316742	0.0999458	3.16914	0.00152891	0.0169035	SMN2
ENSG00000226179	109.181	0.316679	0.152234	2.08021	0.0375061	0.149571	LINC00685
ENSG00000126016	100.094	0.31637	0.13143	2.40713	0.0160783	0.0841796	AMOT
ENSG00000089335	1379.42	0.316318	0.0700016	4.51872	6.22142e-06	0.000387738	ZNF302
ENSG00000070404	104.308	0.315318	0.153676	2.05184	0.0401852	0.156529	FSTL3
ENSG00000162004	91.6205	0.314964	0.126305	2.49367	0.0126428	0.0712932	CCDC78
ENSG00000239672	130.255	0.314375	0.130015	2.41799	0.0156063	0.0827892	NME1
ENSG00000196381	70.7511	0.314041	0.138495	2.26752	0.0233583	0.108746	ZNF781
ENSG00000079263	1864.17	0.313632	0.140157	2.23773	0.025239	0.114618	SP140
ENSG00000164649	776.316	0.313559	0.0794662	3.94581	7.953e-05	0.002272	CDCA7L
ENSG00000167747	401.735	0.313411	0.0738723	4.2426	2.20944e-05	0.000937399	C19orf48
ENSG00000261824	190.541	0.313298	0.101219	3.09525	0.00196645	0.0200624	LINC00662
ENSG00000163697	243.577	0.313286	0.121004	2.58905	0.00962407	0.0589908	APBB2
ENSG00000189283	639.856	0.312676	0.145073	2.15529	0.0311388	0.132409	FHIT
ENSG00000007312	867.117	0.312643	0.14536	2.15082	0.0314907	0.13338	CD79B
ENSG00000112667	541.515	0.312453	0.123573	2.52849	0.0114556	0.0664835	DNPH1
ENSG00000100726	1227.49	0.31245	0.0743951	4.19988	2.67058e-05	0.00106547	TELO2
ENSG00000236778	95.0871	0.312398	0.1045	2.98947	0.00279461	0.0255195	INTS6-AS1
ENSG00000174652	2925.34	0.312351	0.126678	2.4657	0.0136744	0.0752036	ZNF266
ENSG00000263464	36.9632	0.310627	0.149599	2.0764	0.037857	0.150438	PPIAL4C
ENSG00000176476	430.949	0.310053	0.0995191	3.11551	0.00183628	0.0191133	SGF29
ENSG00000101220	271.352	0.309972	0.0752785	4.11768	3.82713e-05	0.00136795	C20orf27
ENSG00000144120	108.674	0.309935	0.118107	2.62419	0.00868562	0.0550025	TMEM177
ENSG00000130684	111.363	0.309825	0.104648	2.96064	0.00307	0.0271046	ZNF337
ENSG00000136153	447.992	0.309081	0.0994354	3.10836	0.00188126	0.0194203	LMO7
ENSG00000226396	36.3192	0.308758	0.155996	1.97927	0.0477853	0.175772
ENSG00000197497	86.2508	0.30819	0.16076	1.91708	0.0552279	0.19427	ZNF665
ENSG00000257242	136.701	0.308149	0.139038	2.2163	0.0266711	0.119021	LINC01619
ENSG00000065534	63.935	0.308108	0.12792	2.4086	0.016014	0.083996	MYLK
ENSG00000185641	477.404	0.307606	0.100712	3.0543	0.00225584	0.021975
ENSG00000179041	317.371	0.307213	0.0960011	3.2001	0.00137381	0.0158173	RRS1
ENSG00000126953	163.214	0.307093	0.0893911	3.43539	0.000591699	0.00898201	TIMM8A
ENSG00000124787	98.6883	0.306925	0.123518	2.48485	0.0129605	0.0726311	RPP40
ENSG00000161558	266.359	0.305869	0.0810112	3.77564	0.000159596	0.00363951	TMEM143
ENSG00000221923	227.798	0.305724	0.117375	2.60468	0.00919607	0.0572785	ZNF880
ENSG00000274265	312.447	0.305223	0.0978501	3.11929	0.00181284	0.018937
ENSG00000184465	603.478	0.30471	0.0898304	3.39206	0.000693688	0.00988988	WDR27
ENSG00000213462	165.766	0.304638	0.128974	2.36201	0.0181764	0.0915101	ERV3-1
ENSG00000125354	8446.87	0.304495	0.0543769	5.59971	2.14706e-08	7.8136e-06	44445
ENSG00000152689	550.046	0.304412	0.14869	2.04728	0.0406303	0.157642	RASGRP3
ENSG00000154265	1084.37	0.304047	0.152712	1.99098	0.046483	0.172796	ABCA5
ENSG00000181938	65.7675	0.303971	0.127609	2.38205	0.0172166	0.0883022	GINS3
ENSG00000156239	267.042	0.303532	0.0940645	3.22684	0.00125164	0.01481	N6AMT1
ENSG00000179598	104.355	0.303447	0.0978039	3.10261	0.00191824	0.0197007	PLD6
ENSG00000101639	1417.87	0.303445	0.128518	2.36111	0.0182201	0.0916624	CEP192
ENSG00000166676	82.2179	0.303359	0.154831	1.95929	0.050079	0.181536	TVP23A
ENSG00000175048	409.39	0.302647	0.130152	2.32534	0.020054	0.0979579	ZDHHC14
ENSG00000213339	755.186	0.302617	0.0754227	4.01228	6.01339e-05	0.00185656	QTRT1
ENSG00000227063	4541.79	0.302444	0.109001	2.77469	0.00552538	0.0403653	RPL41P1
ENSG00000184867	238.784	0.301662	0.0867507	3.47735	0.0005064	0.00815604	ARMCX2
ENSG00000170919	970.231	0.301633	0.132279	2.28028	0.0225909	0.106297	TPT1-AS1
ENSG00000102096	7210.06	0.301597	0.114361	2.63724	0.00835834	0.0536409	PIM2
ENSG00000054219	893.258	0.301306	0.0932733	3.23035	0.00123637	0.0146901	LY75
ENSG00000197937	355.477	0.301195	0.0817774	3.68311	0.000230407	0.00473076	ZNF347
ENSG00000058056	251.759	0.300149	0.086374	3.475	0.000510855	0.00817532	USP13
ENSG00000173272	475.116	0.300125	0.0974144	3.08091	0.00206367	0.02079	MZT2A
ENSG00000196653	109.576	0.299742	0.155639	1.92588	0.0541195	0.191953	ZNF502
ENSG00000255585	70.402	0.299438	0.136939	2.18665	0.0287678	0.125339
ENSG00000130810	65.6623	0.298987	0.122522	2.44028	0.0146758	0.0789582	PPAN
ENSG00000171316	2461.49	0.298916	0.0596875	5.00801	5.49944e-07	6.68866e-05	CHD7
ENSG00000124243	561.833	0.298865	0.13255	2.25474	0.0241497	0.111283	BCAS4
ENSG00000221994	56.5329	0.29886	0.136161	2.1949	0.0281707	0.123705	ZNF630
ENSG00000223705	3928.97	0.298476	0.0675899	4.41599	1.00547e-05	0.000535221	NSUN5P1
ENSG00000163682	11062.8	0.298457	0.106984	2.78975	0.0052749	0.0390327	RPL9
ENSG00000178921	941.262	0.298414	0.0765761	3.89695	9.74103e-05	0.00262386	PFAS
ENSG00000138074	960.843	0.298107	0.0723578	4.11989	3.79045e-05	0.00136077	SLC5A6
ENSG00000028277	5187.52	0.297896	0.112804	2.64083	0.00827029	0.0532632	POU2F2
ENSG00000239470	1292.92	0.297792	0.0953169	3.12423	0.00178271	0.0188094
ENSG00000196628	2095.66	0.296697	0.109607	2.70693	0.00679088	0.0462591	TCF4
ENSG00000242574	1691.6	0.296154	0.132169	2.24073	0.0250437	0.114233	HLA-DMB
ENSG00000166704	393.908	0.295747	0.0703398	4.20454	2.61608e-05	0.00105531	ZNF606
ENSG00000147604	15690.3	0.295702	0.0706723	4.18413	2.86258e-05	0.00110908	RPL7
ENSG00000005884	137.165	0.295591	0.147716	2.00108	0.0453839	0.170014	ITGA3
ENSG00000081923	152.341	0.29552	0.0951649	3.10535	0.00190053	0.019569	ATP8B1
ENSG00000106603	1395.7	0.295393	0.063387	4.66014	3.1599e-06	0.000240075	COA1
ENSG00000067533	532.027	0.294835	0.073023	4.03756	5.40098e-05	0.00173142	RRP15
ENSG00000179627	137.846	0.294723	0.111289	2.64827	0.00809049	0.0524007	ZBTB42
ENSG00000164241	193.944	0.294694	0.0967085	3.04724	0.0023095	0.022293	C5orf63
ENSG00000079819	821.744	0.294519	0.0851288	3.45969	0.000540794	0.00851189	EPB41L2
ENSG00000073605	2017.17	0.294362	0.137636	2.13869	0.0324606	0.135939	GSDMB
ENSG00000224877	193.955	0.294235	0.0981242	2.9986	0.00271227	0.0250219	NDUFAF8
ENSG00000173041	227.902	0.293417	0.0996096	2.94567	0.00322259	0.0279961	ZNF680
ENSG00000265791	42.0296	0.293397	0.134019	2.18923	0.0285804	0.124742
ENSG00000260563	152.793	0.293318	0.101814	2.88091	0.00396529	0.0321258
ENSG00000148468	144.725	0.293154	0.133301	2.19919	0.0278646	0.12279	FAM171A1
ENSG00000172062	1240.24	0.29298	0.0913753	3.20634	0.00134435	0.0155675	SMN1
ENSG00000116874	210.468	0.292596	0.0744702	3.92903	8.52876e-05	0.00237386	WARS2
ENSG00000230207	213.473	0.292327	0.0995885	2.93535	0.00333173	0.0285487	RPL4P5
ENSG00000154743	261.774	0.292188	0.102243	2.85778	0.00426615	0.0337724	TSEN2
ENSG00000176058	249.903	0.291895	0.0897703	3.25158	0.00114766	0.0139923	TPRN
ENSG00000175787	240.61	0.291885	0.0842262	3.46549	0.000529272	0.00837652	ZNF169
ENSG00000169100	6177.43	0.291702	0.0632521	4.61174	3.99318e-06	0.000278247	SLC25A6
ENSG00000183060	306.593	0.291698	0.10107	2.8861	0.00390045	0.0318059	LYSMD4
ENSG00000196549	325.616	0.291568	0.134683	2.16484	0.0304001	0.130384	MME
ENSG00000186416	435.758	0.291492	0.0765442	3.80815	0.000140011	0.00335132	NKRF
ENSG00000117395	514.396	0.291041	0.0911541	3.19284	0.00140881	0.0161129	EBNA1BP2
ENSG00000173209	2886.72	0.291016	0.0658909	4.41664	1.00248e-05	0.000535049	AHSA2P
ENSG00000177721	533.109	0.290952	0.121922	2.38638	0.0170154	0.0875108	ANXA2R
ENSG00000137266	282.606	0.290673	0.108709	2.67388	0.00749797	0.0495943	SLC22A23
ENSG00000166770	150.765	0.290141	0.129615	2.23847	0.0251902	0.114529	ZNF667-AS1
ENSG00000107960	328.874	0.289923	0.122787	2.36118	0.0182168	0.0916624	STN1
ENSG00000178035	2887.13	0.289497	0.083527	3.46591	0.000528433	0.00836984	IMPDH2
ENSG00000165591	346.217	0.289405	0.131032	2.20865	0.0271987	0.120655	FAAH2
ENSG00000270012	78.2055	0.289206	0.113487	2.54836	0.0108231	0.0642027
ENSG00000227354	54.2729	0.289135	0.152106	1.90089	0.057317	0.198934	RBM26-AS1
ENSG00000142046	102.485	0.288866	0.133993	2.15584	0.0310964	0.132296	TMEM91
ENSG00000213551	233.345	0.288853	0.0938948	3.07635	0.00209554	0.0209708	DNAJC9
ENSG00000166166	330.301	0.287978	0.0838445	3.43466	0.00059329	0.00899239	TRMT61A
ENSG00000196683	1407.63	0.287737	0.0742514	3.87517	0.000106549	0.00276971	TOMM7
ENSG00000104524	152.162	0.287719	0.105666	2.72292	0.00647085	0.0448928	PYCR3
ENSG00000274471	238.75	0.287507	0.141837	2.02702	0.0426601	0.162831
ENSG00000228956	863.45	0.287467	0.0803723	3.57669	0.000347974	0.00630817	SATB1-AS1
ENSG00000181007	273.079	0.287195	0.0933394	3.07689	0.00209171	0.0209672	ZFP82
ENSG00000074657	303.296	0.287043	0.136659	2.10044	0.0356904	0.145046	ZNF532
ENSG00000285897	76.2197	0.286192	0.138335	2.06884	0.0385612	0.152452
ENSG00000176422	171.223	0.285084	0.0970897	2.9363	0.00332153	0.0285222	SPRYD4
ENSG00000101546	156.431	0.284939	0.0911596	3.12571	0.00177376	0.0187751	RBFA
ENSG00000178038	377.795	0.284807	0.145989	1.95089	0.0510705	0.184067	ALS2CL
ENSG00000157193	556.476	0.284747	0.0712002	3.99925	6.35444e-05	0.00193507	LRP8
ENSG00000233254	262.205	0.284528	0.143366	1.98463	0.0471854	0.174333	RPL21P134
ENSG00000282173	129.38	0.284362	0.138104	2.05904	0.0394903	0.154874	TRBJ1-5
ENSG00000198931	1391.04	0.283856	0.0729686	3.89011	0.000100198	0.00266329	APRT
ENSG00000105552	345.334	0.28385	0.0790573	3.59044	0.000330124	0.00610332	BCAT2
ENSG00000118418	754.273	0.283699	0.0753849	3.76334	0.000167658	0.00376891	HMGN3
ENSG00000100577	143.685	0.283542	0.0981978	2.88746	0.00388369	0.0317466	GSTZ1
ENSG00000130021	251.885	0.283066	0.13876	2.03997	0.0413535	0.159623	PUDP
ENSG00000160818	710.272	0.283018	0.0801264	3.53214	0.000412211	0.00705823	GPATCH4
ENSG00000116649	847.668	0.282488	0.0780851	3.61769	0.000297242	0.00570673	SRM
ENSG00000159228	249.413	0.282426	0.128371	2.20007	0.0278019	0.122595	CBR1
ENSG00000122873	177.265	0.281819	0.0930454	3.02883	0.00245503	0.0232394	CISD1
ENSG00000103024	463.263	0.281521	0.104437	2.69562	0.00702587	0.0472821	NME3
ENSG00000213015	535.97	0.281342	0.0898022	3.13291	0.00173083	0.0184266	ZNF580
ENSG00000103202	384.303	0.281248	0.137131	2.05094	0.0402724	0.156656	NME4
ENSG00000134809	285.112	0.281151	0.116641	2.41039	0.0159356	0.0836994	TIMM10
ENSG00000163644	2787.41	0.2809	0.141083	1.99102	0.0464783	0.172796	PPM1K
ENSG00000144749	789.728	0.280791	0.0931377	3.01479	0.00257157	0.0240701	LRIG1
ENSG00000145247	930.355	0.280609	0.104796	2.67766	0.00741374	0.0491994	OCIAD2
ENSG00000172005	646.591	0.280467	0.0854508	3.28221	0.00102998	0.0129753	MAL
ENSG00000184307	394.475	0.280449	0.1099	2.55186	0.0107148	0.0637111	ZDHHC23
ENSG00000196275	879.691	0.280404	0.0901598	3.11007	0.00187041	0.0193225	GTF2IRD2
ENSG00000139428	180.853	0.280249	0.104556	2.68036	0.0073542	0.0489175	MMAB
ENSG00000165138	352.875	0.280041	0.0802477	3.48971	0.000483536	0.00791485	ANKS6
ENSG00000254469	59.1165	0.279838	0.143033	1.95646	0.0504109	0.18241
ENSG00000169093	791.842	0.279813	0.067905	4.12065	3.7781e-05	0.00135876	ASMTL
ENSG00000167085	772.043	0.279674	0.0828657	3.37503	0.000738073	0.0103073	PHB
ENSG00000128059	407.428	0.27961	0.086537	3.2311	0.00123314	0.0146691	PPAT
ENSG00000174749	432.269	0.279011	0.10723	2.60199	0.00926841	0.0575134	FAM241A
ENSG00000182199	1562.03	0.278863	0.0746679	3.73471	0.000187935	0.00409353	SHMT2
ENSG00000052802	732.572	0.27877	0.102181	2.7282	0.00636818	0.0444665	MSMO1
ENSG00000178188	2460.38	0.278655	0.0572054	4.87113	1.1096e-06	0.000111337	SH2B1
ENSG00000156398	289.884	0.278574	0.0854525	3.25999	0.00111415	0.0137255	SFXN2
ENSG00000141556	2568.91	0.277933	0.108889	2.55243	0.0106974	0.0636524	TBCD
ENSG00000089157	24942	0.277932	0.0637896	4.35701	1.31849e-05	0.000643783	RPLP0
ENSG00000272849	308.38	0.27775	0.100979	2.75058	0.00594899	0.0424252
ENSG00000005889	1860.53	0.277712	0.0896787	3.09675	0.00195657	0.019988	ZFX
ENSG00000113368	1496.47	0.277534	0.144865	1.91582	0.0553885	0.194414	LMNB1
ENSG00000169682	108.591	0.277371	0.118617	2.33838	0.0193678	0.0955829	SPNS1
ENSG00000267787	124.432	0.27699	0.114569	2.41767	0.0156203	0.0827969
ENSG00000178952	2473.23	0.276713	0.0828843	3.33854	0.000842191	0.0112374	TUFM
ENSG00000117643	1074.28	0.276632	0.0939039	2.94591	0.00322009	0.0279961	MAN1C1
ENSG00000114812	387.586	0.276362	0.139967	1.97448	0.0483276	0.177107	VIPR1
ENSG00000167969	344.587	0.276297	0.0690037	4.00408	6.2258e-05	0.00190615	ECI1
ENSG00000204394	1380.87	0.275926	0.0572488	4.81977	1.43725e-06	0.000138003	VARS
ENSG00000139631	672.343	0.275536	0.0798686	3.44986	0.000560871	0.008705	CSAD
ENSG00000173198	661.946	0.275367	0.114883	2.39693	0.0165332	0.0857332	CYSLTR1
ENSG00000172893	324.483	0.275202	0.0974942	2.82275	0.0047613	0.0363445	DHCR7
ENSG00000237036	104.614	0.274978	0.115895	2.37266	0.0176606	0.0897474	ZEB1-AS1
ENSG00000065485	162.047	0.274603	0.119864	2.29095	0.0219662	0.104262	PDIA5
ENSG00000248508	155.281	0.274487	0.092431	2.96965	0.00298141	0.0266034	SRP14-AS1
ENSG00000139626	1315.39	0.273676	0.133986	2.04258	0.0410945	0.159021	ITGB7
ENSG00000137288	309.485	0.273322	0.0767578	3.56083	0.000369678	0.00654838	UQCC2
ENSG00000184584	900.597	0.273271	0.106906	2.55618	0.0105827	0.0632253	TMEM173
ENSG00000169592	1491.25	0.273147	0.0675593	4.04307	5.27556e-05	0.00171588	INO80E
ENSG00000165490	81.3479	0.272648	0.124682	2.18675	0.0287609	0.125336	DDIAS
ENSG00000227507	5141.03	0.272493	0.102281	2.66415	0.00771827	0.0507671	LTB
ENSG00000147050	1733.26	0.27233	0.0994359	2.73875	0.00616731	0.0434595	KDM6A
ENSG00000243156	534.259	0.272093	0.123115	2.21007	0.0271001	0.12048	MICAL3
ENSG00000198237	333.861	0.272018	0.139119	1.95529	0.0505483	0.18273
ENSG00000250479	264.541	0.271647	0.118443	2.29348	0.0218205	0.103791	CHCHD10
ENSG00000048052	589.871	0.271553	0.11395	2.38309	0.0171679	0.0880959	HDAC9
ENSG00000253106	75.2956	0.271486	0.121339	2.23741	0.0252596	0.11466
ENSG00000181163	12128.1	0.271483	0.0744961	3.64426	0.000268159	0.00528995	NPM1
ENSG00000106133	791.124	0.271073	0.0703905	3.85099	0.000117644	0.00297238	NSUN5P2
ENSG00000171130	522.307	0.27103	0.0869392	3.11747	0.00182409	0.0190161	ATP6V0E2
ENSG00000261556	310.43	0.270479	0.103722	2.60774	0.00911424	0.0569441	SMG1P7
ENSG00000090006	621.482	0.270462	0.0715788	3.77852	0.000157762	0.00361	LTBP4
ENSG00000102445	3170.25	0.270105	0.132767	2.03443	0.0419087	0.1609	RUBCNL
ENSG00000079459	2359.35	0.269402	0.0646361	4.16798	3.07314e-05	0.0011747	FDFT1
ENSG00000125826	2553.78	0.268721	0.133556	2.01206	0.0442141	0.166972	RBCK1
ENSG00000267041	218.032	0.268672	0.0669497	4.01303	5.99432e-05	0.001854	ZNF850
ENSG00000112972	1461.67	0.268646	0.084965	3.16184	0.00156776	0.0171267	HMGCS1
ENSG00000179909	1096.74	0.268613	0.113238	2.3721	0.0176871	0.0898369	ZNF154
ENSG00000250565	143.972	0.26859	0.0972905	2.7607	0.0057678	0.0415762	ATP6V1E2
ENSG00000259891	80.2992	0.268539	0.124479	2.15731	0.0309818	0.131949
ENSG00000183077	83.3182	0.268407	0.105411	2.54629	0.0108876	0.0643605	AFMID
ENSG00000250568	150.528	0.268274	0.129298	2.07485	0.0380004	0.150919
ENSG00000275464	710.172	0.267667	0.125693	2.12953	0.0332103	0.138213
ENSG00000136997	3700.96	0.267506	0.0704756	3.79572	0.000147218	0.0034554	MYC
ENSG00000213347	190.246	0.267297	0.122417	2.1835	0.0289991	0.126046	MXD3
ENSG00000137038	466.747	0.267274	0.0931227	2.87013	0.00410302	0.0328832	DMAC1
ENSG00000267481	115.044	0.266727	0.114168	2.33626	0.0194777	0.0959682
ENSG00000142937	16071.5	0.266591	0.0784898	3.3965	0.000682531	0.00982176	RPS8
ENSG00000075826	1247.49	0.266352	0.0750235	3.55025	0.000384865	0.00676312	SEC31B
ENSG00000131127	652.398	0.265997	0.0776494	3.42562	0.000613409	0.00917963	ZNF141
ENSG00000183199	151.162	0.265654	0.107465	2.472	0.0134359	0.0743399	HSP90AB3P
ENSG00000120675	714.784	0.265137	0.109964	2.41112	0.0159035	0.0836707	DNAJC15
ENSG00000284691	841.147	0.265118	0.0898314	2.95128	0.00316455	0.0276475
ENSG00000100784	819.923	0.265116	0.0830422	3.19255	0.00141022	0.0161163	RPS6KA5
ENSG00000110104	195.337	0.264193	0.109754	2.40715	0.0160776	0.0841796	CCDC86
ENSG00000175581	302.601	0.264007	0.0846467	3.11893	0.00181509	0.018937	MRPL48
ENSG00000163597	440.926	0.263913	0.0714233	3.69506	0.000219839	0.004586	SNHG16
ENSG00000245164	3901.63	0.263803	0.0902723	2.9223	0.00347461	0.0292976	LINC00861
ENSG00000112425	204.319	0.263779	0.117438	2.24611	0.024697	0.113232	EPM2A
ENSG00000180479	154.874	0.263688	0.0932427	2.82797	0.00468444	0.0359218	ZNF571
ENSG00000174669	237.406	0.263448	0.11179	2.35664	0.0184412	0.0924273	SLC29A2
ENSG00000144161	1053.92	0.263266	0.0854667	3.08033	0.0020677	0.0207993	ZC3H8
ENSG00000178852	223.475	0.262909	0.117099	2.24519	0.0247557	0.113347	EFCAB13
ENSG00000120800	889.803	0.262761	0.0673661	3.9005	9.59952e-05	0.00259627	UTP20
ENSG00000120526	502.838	0.262159	0.0873962	2.99966	0.00270283	0.0249726	NUDCD1
ENSG00000069966	777.701	0.261958	0.0780002	3.35842	0.000783882	0.0107379	GNB5
ENSG00000196867	222.871	0.261704	0.0927422	2.82184	0.00477491	0.0364069	ZFP28
ENSG00000125247	438.579	0.261625	0.124706	2.09794	0.0359101	0.145537	TMTC4
ENSG00000009724	176.532	0.261418	0.0802362	3.2581	0.00112161	0.013775	MASP2
ENSG00000131368	1172.18	0.261376	0.0533647	4.89791	9.68598e-07	0.000100714	MRPS25
ENSG00000271870	90.8246	0.261328	0.129017	2.02553	0.0428129	0.163123
ENSG00000155189	1086.04	0.261101	0.0755889	3.45423	0.000551873	0.00861866	AGPAT5
ENSG00000163545	894.644	0.260823	0.0729427	3.57572	0.000349259	0.00632575	NUAK2
ENSG00000149970	216.67	0.26065	0.103532	2.51757	0.0118166	0.0678887	CNKSR2
ENSG00000046647	278.723	0.260482	0.0747141	3.48638	0.000489599	0.00798153	GEMIN8
ENSG00000110987	719.475	0.26018	0.0922648	2.81993	0.00480345	0.0365322	BCL7A
ENSG00000217130	53.8975	0.26011	0.12956	2.00764	0.0446819	0.167824
ENSG00000176593	350.999	0.260046	0.105764	2.45875	0.0139423	0.0761979
ENSG00000269427	85.9437	0.259745	0.126666	2.05063	0.0403031	0.156684
ENSG00000174547	353.032	0.259368	0.0752089	3.44864	0.000563424	0.00872438	MRPL11
ENSG00000114686	1060.23	0.25879	0.0659578	3.92357	8.7248e-05	0.00241502	MRPL3
ENSG00000118162	172.767	0.258452	0.101921	2.5358	0.011219	0.0656141	KPTN
ENSG00000198804	187407	0.258413	0.0627061	4.12102	3.77198e-05	0.00135876	MT-CO1
ENSG00000174444	25829.7	0.25809	0.0760647	3.39303	0.000691238	0.00987314	RPL4
ENSG00000118096	220.085	0.258064	0.0827045	3.12031	0.00180658	0.0189125	IFT46
ENSG00000104884	437.676	0.257998	0.0846884	3.04644	0.00231572	0.0223101	ERCC2
ENSG00000141576	802.134	0.257895	0.0918928	2.80647	0.00500872	0.0376932	RNF157
ENSG00000122378	295.246	0.257516	0.103367	2.49127	0.0127289	0.071673	PRXL2A
ENSG00000119977	734.395	0.257177	0.089682	2.86765	0.00413534	0.0330761	TCTN3
ENSG00000075914	433.87	0.257119	0.0664313	3.87045	0.000108636	0.00280941	EXOSC7
ENSG00000128050	1880.87	0.256961	0.0943758	2.72274	0.00647425	0.0448928	PAICS
ENSG00000254887	71.6942	0.256859	0.135103	1.90121	0.0572749	0.198876
ENSG00000165802	1060.77	0.256783	0.111311	2.30689	0.0210611	0.101356	NSMF
ENSG00000151687	136.727	0.256602	0.100957	2.5417	0.0110314	0.0649115	ANKAR
ENSG00000124374	240.834	0.2566	0.0979319	2.62019	0.00878804	0.0554797	PAIP2B
ENSG00000080608	760.2	0.256091	0.0792661	3.23078	0.00123454	0.014677	PUM3
ENSG00000170631	154.471	0.256075	0.0856644	2.98928	0.00279636	0.0255195	ZNF16
ENSG00000169696	617.896	0.25603	0.0650946	3.93319	8.38246e-05	0.00234873	ASPSCR1
ENSG00000079435	217.513	0.255997	0.0870373	2.94124	0.00326901	0.0282068	LIPE
ENSG00000147687	280.442	0.255964	0.0812226	3.15139	0.00162497	0.0175984	TATDN1
ENSG00000225855	261.391	0.255411	0.0948338	2.69325	0.00707584	0.0475069	RUSC1-AS1
ENSG00000151743	124.321	0.254872	0.0910113	2.80044	0.00510322	0.0381137	AMN1
ENSG00000247092	81.7097	0.254759	0.126864	2.00812	0.04463	0.167816	SNHG10
ENSG00000102409	605.768	0.254602	0.0814624	3.12539	0.00177572	0.0187751	BEX4
ENSG00000215845	283.459	0.254585	0.0996874	2.55383	0.0106546	0.0635223	TSTD1
ENSG00000118600	185.871	0.25437	0.100985	2.51889	0.0117724	0.0677507	RXYLT1
ENSG00000132849	463.683	0.254298	0.0846961	3.00248	0.00267792	0.0247887	PATJ
ENSG00000178718	118.88	0.254248	0.112293	2.26416	0.0235645	0.109466	RPP25
ENSG00000103227	325.697	0.25423	0.098337	2.58529	0.00972966	0.0595289	LMF1
ENSG00000196155	434.03	0.254024	0.126239	2.01224	0.0441944	0.166929	PLEKHG4
ENSG00000168038	156.655	0.253862	0.105397	2.40863	0.0160126	0.083996	ULK4
ENSG00000178105	477.513	0.253526	0.0788427	3.21559	0.00130175	0.0151881	DDX10
ENSG00000161618	753.277	0.253445	0.10841	2.33785	0.0193953	0.0956796	ALDH16A1
ENSG00000104518	2821.16	0.253262	0.0883369	2.867	0.00414383	0.0331176	GSDMD
ENSG00000224858	335.918	0.253048	0.111872	2.26194	0.0237014	0.109795	RPL29P11
ENSG00000119723	130.149	0.252749	0.088277	2.86313	0.00419478	0.0333654	COQ6
ENSG00000133460	245.856	0.252683	0.0969762	2.60561	0.00917101	0.0572098	SLC2A11
ENSG00000197599	212.064	0.252638	0.120236	2.10118	0.0356255	0.14487	CCDC154
ENSG00000163606	253.39	0.252359	0.0777492	3.24582	0.00117115	0.0141791	CD200R1
ENSG00000196305	3144.39	0.252283	0.0816164	3.09109	0.00199424	0.0202635	IARS
ENSG00000083845	8824.52	0.252163	0.0725805	3.47425	0.000512284	0.00819165	RPS5
ENSG00000174292	145.413	0.252146	0.0972126	2.59375	0.00949345	0.0585478	TNK1
ENSG00000168646	244.18	0.251962	0.123415	2.04158	0.041193	0.15928	AXIN2
ENSG00000103148	805.716	0.251936	0.0564969	4.4593	8.2228e-06	0.000474181	NPRL3
ENSG00000189046	184.167	0.251726	0.0908278	2.77147	0.00558045	0.0406639	ALKBH2
ENSG00000033170	506.634	0.251414	0.07887	3.1877	0.00143411	0.0162573	FUT8
ENSG00000188976	1680.59	0.251084	0.050418	4.98005	6.35684e-07	7.37394e-05	NOC2L
ENSG00000100297	1504.66	0.250991	0.0756592	3.31739	0.000908619	0.0117545	MCM5
ENSG00000156795	172.157	0.250818	0.0850362	2.94954	0.00318247	0.0277557	WDYHV1
ENSG00000141040	140.241	0.250425	0.101688	2.46268	0.0137904	0.0756134	ZNF287
ENSG00000005206	2052.26	0.250416	0.0830914	3.01374	0.00258046	0.0241015	SPPL2B
ENSG00000136261	796.595	0.250289	0.060215	4.15659	3.23026e-05	0.00121851	BZW2
ENSG00000106628	978.269	0.250117	0.0859804	2.909	0.0036259	0.0301634	POLD2
ENSG00000185864	3821.56	0.250004	0.0790676	3.1619	0.00156745	0.0171267	NPIPB4
ENSG00000178425	548.363	0.24981	0.0775851	3.21982	0.00128271	0.0150359	NT5DC1
ENSG00000101911	765.793	0.249576	0.109509	2.27904	0.0226649	0.106426	PRPS2
ENSG00000196247	1421.73	0.24941	0.0957263	2.60545	0.00917538	0.0572192	ZNF107
ENSG00000235194	840.822	0.249348	0.0956034	2.60815	0.0091033	0.0568935	PPP1R3E
ENSG00000254206	1086.64	0.249241	0.0810745	3.07422	0.00211052	0.0210821	NPIPB11
ENSG00000215788	3559.4	0.248938	0.0897163	2.77472	0.00552488	0.0403653	TNFRSF25
ENSG00000145912	347.22	0.248873	0.0876229	2.84028	0.00450745	0.0351284	NHP2
ENSG00000245060	500.564	0.248816	0.0877047	2.83697	0.00455433	0.035344	LINC00847
ENSG00000065183	943.276	0.248777	0.0520929	4.77565	1.79132e-06	0.000157399	WDR3
ENSG00000170092	230.014	0.248734	0.128586	1.93438	0.0530669	0.189357	SPDYE5
ENSG00000138095	3416.3	0.248414	0.0709851	3.49952	0.000466104	0.00770492	LRPPRC
ENSG00000198182	265.452	0.248313	0.0814729	3.0478	0.00230522	0.0222731	ZNF607
ENSG00000280128	582.423	0.247408	0.0889554	2.78126	0.00541484	0.0397966
ENSG00000101361	2788.51	0.247389	0.0413827	5.97809	2.25765e-09	1.51022e-06	NOP56
ENSG00000232442	621.59	0.247313	0.0994875	2.48587	0.0129233	0.0724429	MHENCR
ENSG00000053702	177.183	0.246869	0.0732682	3.36938	0.000753366	0.0104404	NRIP2
ENSG00000225159	146.897	0.246824	0.118972	2.07464	0.0380203	0.150968	NPM1P39
ENSG00000111364	796.227	0.246622	0.0557189	4.42619	9.59118e-06	0.000520205	DDX55
ENSG00000112699	205.209	0.246582	0.0849346	2.9032	0.00369375	0.0305927	GMDS
ENSG00000100823	2207.65	0.246549	0.0585217	4.21295	2.52061e-05	0.00102604	APEX1
ENSG00000277117	1030.32	0.246363	0.11425	2.15634	0.0310569	0.132213
ENSG00000138363	1537.15	0.245675	0.0638787	3.84596	0.00012008	0.00302356	ATIC
ENSG00000243477	217.639	0.245636	0.0898773	2.73302	0.00627571	0.0439584	NAA80
ENSG00000166275	449.794	0.245585	0.0957095	2.56594	0.0102898	0.061936	BORCS7
ENSG00000166133	259.409	0.245446	0.0704818	3.48241	0.000496925	0.00805517	RPUSD2
ENSG00000125375	500.794	0.245343	0.0771049	3.18193	0.00146297	0.0164845	DMAC2L
ENSG00000143947	10133.3	0.245156	0.0746672	3.28332	0.00102592	0.0129323	RPS27A
ENSG00000142599	2476	0.245078	0.10314	2.37616	0.0174941	0.0892547	RERE
ENSG00000197457	1682.75	0.24498	0.104361	2.34743	0.0189032	0.0941546	STMN3
ENSG00000170854	444.724	0.24473	0.0680215	3.59783	0.000320879	0.00599706	RIOX2
ENSG00000267152	109.033	0.244532	0.0923604	2.64759	0.00810687	0.0524464
ENSG00000151131	280.164	0.244526	0.0893523	2.73665	0.00620682	0.0436466	C12orf45
ENSG00000176472	76.4454	0.24434	0.12258	1.99331	0.0462274	0.172113	ZNF575
ENSG00000214106	487.19	0.244333	0.0918582	2.65989	0.00781653	0.0512602	PAXIP1-AS2
ENSG00000119333	302.748	0.24416	0.105529	2.31366	0.0206861	0.100078	WDR34
ENSG00000179958	320.302	0.244047	0.0884596	2.75886	0.00580035	0.0417207	DCTPP1
ENSG00000108561	1462.86	0.244015	0.076196	3.20247	0.00136255	0.0157238	C1QBP
ENSG00000139514	1506.09	0.24375	0.108545	2.24561	0.0247288	0.113327	SLC7A1
ENSG00000107902	267.445	0.243486	0.123394	1.97324	0.048468	0.17746	LHPP
ENSG00000247679	114.726	0.243399	0.125084	1.94588	0.0516694	0.185543
ENSG00000153896	119.804	0.243274	0.107288	2.26748	0.0233608	0.108746	ZNF599
ENSG00000231006	529.567	0.243245	0.110836	2.19465	0.0281888	0.123757	RPL7P32
ENSG00000078319	240.111	0.242842	0.0792383	3.06471	0.0021788	0.0214861	PMS2P1
ENSG00000164114	280.85	0.242733	0.102169	2.3758	0.0175112	0.089299	MAP9
ENSG00000260565	590.411	0.242709	0.0886614	2.73749	0.00619106	0.0435659	ERVK13-1
ENSG00000197785	627.996	0.242669	0.0844369	2.87397	0.00405343	0.0326159	ATAD3A
ENSG00000116922	385.053	0.242629	0.0652268	3.71977	0.000199405	0.00425763	C1orf109
ENSG00000131849	118.625	0.242613	0.11805	2.05516	0.0398635	0.15582	ZNF132
ENSG00000167393	527.532	0.242314	0.0853246	2.83991	0.00451267	0.0351418	PPP2R3B
ENSG00000065150	2891.93	0.242019	0.070397	3.43791	0.000586217	0.00894616	IPO5
ENSG00000242299	820.983	0.24184	0.077762	3.11001	0.00187082	0.0193225
ENSG00000265206	1866.84	0.241079	0.0708974	3.40039	0.00067291	0.00974096
ENSG00000132406	340.44	0.241061	0.093549	2.57684	0.00997071	0.0606892	TMEM128
ENSG00000105926	444.543	0.241055	0.0792862	3.04031	0.00236332	0.0226085	MPP6
ENSG00000144381	4943.78	0.240796	0.0736193	3.27082	0.00107236	0.0133748	HSPD1
ENSG00000105227	127.532	0.240637	0.111463	2.1589	0.0308577	0.131588	PRX
ENSG00000122033	580.497	0.240518	0.0832019	2.89078	0.0038429	0.0314869	MTIF3
ENSG00000130826	1632.83	0.240502	0.0531008	4.52915	5.92201e-06	0.000377279	DKC1
ENSG00000163029	2286.26	0.240136	0.0940797	2.55247	0.0106962	0.0636524	SMC6
ENSG00000269893	694.474	0.240019	0.0760297	3.15691	0.0015945	0.0173434	SNHG8
ENSG00000238105	552.437	0.239964	0.0870362	2.75706	0.00583236	0.0418312	GOLGA2P5
ENSG00000204305	882.231	0.239873	0.088758	2.70256	0.00688084	0.0466909	AGER
ENSG00000114767	406.506	0.239809	0.0828629	2.89405	0.00380307	0.0312148	RRP9
ENSG00000196205	73192.3	0.239732	0.0887775	2.70037	0.00692626	0.0468316	EEF1A1P5
ENSG00000109762	542.012	0.239692	0.103589	2.31387	0.020675	0.100078	SNX25
ENSG00000181894	415.897	0.239682	0.0712565	3.36364	0.00076921	0.010602	ZNF329
ENSG00000112578	323.718	0.239601	0.11082	2.16207	0.0306127	0.131066	BYSL
ENSG00000144554	424.228	0.239034	0.0808012	2.9583	0.0030934	0.027217	FANCD2
ENSG00000065427	3145.13	0.238822	0.0820103	2.9121	0.00359007	0.0299815	KARS
ENSG00000137502	2426.83	0.238755	0.09338	2.55681	0.0105637	0.0631496	RAB30
ENSG00000130414	1907.64	0.238553	0.0451306	5.28583	1.25136e-07	2.27848e-05	NDUFA10
ENSG00000170638	2056.27	0.238344	0.0988828	2.41036	0.0159366	0.0836994	TRABD
ENSG00000198168	446.37	0.2382	0.069949	3.40534	0.000660821	0.00961665	SVIP
ENSG00000234009	144.516	0.238146	0.121235	1.96433	0.0494921	0.180175	RPL5P34
ENSG00000132768	677.422	0.238001	0.070356	3.38281	0.000717491	0.0101031	DPH2
ENSG00000184162	232.287	0.237919	0.0765877	3.10649	0.0018932	0.0195235	NR2C2AP
ENSG00000146409	574.961	0.237783	0.113026	2.10378	0.0353975	0.144223	SLC18B1
ENSG00000083123	267.328	0.237739	0.0813611	2.92202	0.00347767	0.0293111	BCKDHB
ENSG00000242445	123.413	0.237331	0.115638	2.05237	0.0401341	0.15639	RPL7AP11
ENSG00000118420	84.9936	0.23723	0.119576	1.98392	0.0472646	0.174518	UBE3D
ENSG00000171132	589.888	0.236993	0.119193	1.98832	0.0467764	0.173353	PRKCE
ENSG00000046651	1756.38	0.236986	0.0553483	4.28171	1.85461e-05	0.000825242	OFD1
ENSG00000082068	568.536	0.236877	0.0645521	3.66955	0.000242977	0.0049154	WDR70
ENSG00000065923	1052.04	0.236668	0.114534	2.06635	0.0387956	0.153067	SLC9A7
ENSG00000152556	418.626	0.236574	0.0857654	2.75838	0.00580879	0.0417402	PFKM
ENSG00000239779	274.573	0.236519	0.0885277	2.67169	0.00754706	0.0498205	WBP1
ENSG00000198556	453.839	0.236412	0.0683582	3.45844	0.000543322	0.00852988	ZNF789
ENSG00000167702	565.039	0.236318	0.11114	2.12632	0.033477	0.139035	KIFC2
ENSG00000085662	1179.13	0.236051	0.0767335	3.07625	0.00209624	0.0209708	AKR1B1
ENSG00000163938	1933.49	0.235495	0.0598376	3.93557	8.29981e-05	0.00234157	GNL3
ENSG00000082512	2506.44	0.235095	0.0614107	3.82824	0.000129063	0.00315093	TRAF5
ENSG00000138326	13725	0.234825	0.0680807	3.44921	0.000562231	0.00871936	RPS24
ENSG00000113318	322.941	0.234765	0.0854056	2.74882	0.00598101	0.042593	MSH3
ENSG00000256771	467.824	0.234699	0.0828825	2.83171	0.00462995	0.0356404	ZNF253
ENSG00000106305	166.788	0.234547	0.0916097	2.56028	0.0104586	0.0628019	AIMP2
ENSG00000140988	17198	0.234532	0.0972771	2.41097	0.0159103	0.0836707	RPS2
ENSG00000213203	2199.01	0.234343	0.0797459	2.93862	0.00329675	0.0283945	GIMAP1
ENSG00000177030	1001.96	0.234302	0.0931871	2.51432	0.0119263	0.0682762	DEAF1
ENSG00000198894	505.254	0.233985	0.0909723	2.57205	0.0101098	0.0612201	CIPC
ENSG00000142892	634.013	0.233914	0.0786862	2.97275	0.00295145	0.0263712	PIGK
ENSG00000138134	692.308	0.233739	0.121464	1.92435	0.0543107	0.192303	STAMBPL1
ENSG00000104907	1661.74	0.233509	0.0571277	4.08749	4.3606e-05	0.00150679	TRMT1
ENSG00000244716	1123.14	0.233482	0.0729817	3.19918	0.0013782	0.0158497
ENSG00000198131	622.081	0.233315	0.0532079	4.38498	1.15997e-05	0.000592288	ZNF544
ENSG00000081665	995.419	0.233273	0.0783741	2.9764	0.00291653	0.0261523	ZNF506
ENSG00000120437	357.786	0.232513	0.0943993	2.46308	0.013775	0.0756134	ACAT2
ENSG00000232956	820.59	0.232437	0.0943918	2.46247	0.0137982	0.0756318	SNHG15
ENSG00000240053	153.353	0.232411	0.103991	2.23491	0.0254232	0.115194	LY6G5B
ENSG00000086712	850.353	0.232357	0.0613116	3.78978	0.00015078	0.00352253	TXLNG
ENSG00000139180	225.407	0.232335	0.087301	2.66131	0.00778376	0.0510973	NDUFA9
ENSG00000116251	3326.83	0.232017	0.0762186	3.04411	0.00233373	0.0224223	RPL22
ENSG00000267508	133.34	0.231966	0.104983	2.20955	0.0271362	0.12056	ZNF285
ENSG00000138193	166.358	0.23183	0.087899	2.63746	0.00835284	0.0536399	PLCE1
ENSG00000183508	1513.32	0.231632	0.101305	2.28649	0.0222259	0.105121	TENT5C
ENSG00000149273	20019.4	0.231571	0.065318	3.54529	0.000392176	0.00683176	RPS3
ENSG00000090447	550.716	0.23124	0.0789971	2.9272	0.00342034	0.0290353	TFAP4
ENSG00000132382	1472.39	0.231118	0.0612289	3.77465	0.000160234	0.00364953	MYBBP1A
ENSG00000116353	156.567	0.231059	0.076081	3.03702	0.00238933	0.0228003	MECR
ENSG00000019582	23266.2	0.231057	0.109	2.1198	0.0340229	0.140487	CD74
ENSG00000179144	6189.99	0.230907	0.0842179	2.74178	0.00611066	0.0431642	GIMAP7
ENSG00000214182	99.2473	0.230802	0.118343	1.95028	0.0511427	0.184194	PTMAP5
ENSG00000198755	10679.3	0.230577	0.0742303	3.10625	0.00189479	0.0195235	RPL10A
ENSG00000063761	175.341	0.230072	0.0911358	2.5245	0.0115863	0.0669812	ADCK1
ENSG00000211749	112.595	0.229991	0.111961	2.05421	0.0399554	0.156027	TRBV23-1
ENSG00000197863	155.711	0.229844	0.0869452	2.64355	0.00820428	0.052906	ZNF790
ENSG00000180822	294.378	0.229819	0.0846025	2.71645	0.00659854	0.0454114	PSMG4
ENSG00000138442	623.228	0.229676	0.0724777	3.16892	0.00153005	0.0169035	WDR12
ENSG00000212694	1112.75	0.229589	0.0795171	2.88729	0.00388581	0.031751	LINC01089
ENSG00000123992	1460.85	0.229545	0.103899	2.2093	0.0271535	0.120579	DNPEP
ENSG00000109063	326.038	0.229032	0.0700479	3.26965	0.00107682	0.0134221	MYH3
ENSG00000156508	236593	0.229008	0.0690294	3.31755	0.000908115	0.0117545	EEF1A1
ENSG00000161395	353.233	0.229007	0.0768436	2.98016	0.00288093	0.0259491	PGAP3
ENSG00000256223	246.656	0.22797	0.0787172	2.89606	0.00377883	0.031065	ZNF10
ENSG00000006607	778.136	0.227951	0.0837529	2.72171	0.0064946	0.0449582	FARP2
ENSG00000090263	293.176	0.22772	0.0811028	2.8078	0.00498812	0.0376321	MRPS33
ENSG00000188234	707.842	0.227607	0.0831452	2.73747	0.00619144	0.0435659	AGAP4
ENSG00000163596	151.299	0.227337	0.116127	1.95765	0.0502706	0.182025	ICA1L
ENSG00000136942	5571.55	0.227274	0.0685951	3.31326	0.00092215	0.0119008	RPL35
ENSG00000122406	15080.2	0.227256	0.0735396	3.09025	0.00199989	0.02029	RPL5
ENSG00000279369	418.074	0.227245	0.104419	2.17628	0.0295342	0.127763
ENSG00000174989	393.701	0.226991	0.0583143	3.89254	9.92019e-05	0.0026403	FBXW8
ENSG00000132313	647.361	0.226315	0.0637174	3.55186	0.000382525	0.00672789	MRPL35
ENSG00000213066	439.448	0.226052	0.0735783	3.07226	0.00212444	0.0211684	FGFR1OP
ENSG00000102738	584.502	0.225712	0.0519943	4.34108	1.41784e-05	0.000672635	MRPS31
ENSG00000198712	53103.5	0.22571	0.0545096	4.14075	3.46173e-05	0.00127937	MT-CO2
ENSG00000187792	175.279	0.225666	0.0817723	2.75969	0.00578565	0.041645	ZNF70
ENSG00000136111	2314.28	0.225443	0.0825223	2.7319	0.00629701	0.0440462	TBC1D4
ENSG00000169020	69.9755	0.22543	0.114944	1.96122	0.0498536	0.181112	ATP5ME
ENSG00000173638	254.652	0.225394	0.108004	2.08691	0.0368964	0.148117	SLC19A1
ENSG00000185813	450.243	0.225288	0.0601714	3.7441	0.000181043	0.00400569	PCYT2
ENSG00000145945	160.272	0.225277	0.0897682	2.50955	0.0120886	0.0689241	FAM50B
ENSG00000231500	23275.4	0.225223	0.0675033	3.33647	0.000848485	0.0112914	RPS18
ENSG00000185869	201.096	0.225137	0.0911907	2.46886	0.0135545	0.0748109	ZNF829
ENSG00000135185	847.868	0.225099	0.0571485	3.93884	8.18767e-05	0.00232405	TMEM243
ENSG00000181610	497.722	0.224949	0.0712129	3.15883	0.00158406	0.0172579	MRPS23
ENSG00000175792	688.232	0.224871	0.054959	4.09162	4.28371e-05	0.00148729	RUVBL1
ENSG00000107815	556.365	0.224619	0.0721774	3.11204	0.00185801	0.0192596	TWNK
ENSG00000156697	746.319	0.224344	0.0552974	4.05704	4.96986e-05	0.00165398	UTP14A
ENSG00000070785	273.789	0.224122	0.0802209	2.79381	0.00520904	0.0386737	EIF2B3
ENSG00000256269	255.656	0.223985	0.093761	2.38889	0.0168992	0.0871137	HMBS
ENSG00000095059	167.713	0.223788	0.109787	2.03838	0.0415119	0.160019	DHPS
ENSG00000268087	88.9825	0.223553	0.115785	1.93076	0.0535127	0.190505
ENSG00000240376	374.442	0.223481	0.111294	2.00802	0.0446414	0.167824
ENSG00000243199	217.499	0.22341	0.0916097	2.43871	0.0147397	0.0791957
ENSG00000007255	347.291	0.22311	0.0595833	3.7445	0.000180753	0.0040037	TRAPPC6A
ENSG00000245680	432.004	0.223094	0.103984	2.14545	0.0319166	0.134362	ZNF585B
ENSG00000196411	184.552	0.222925	0.107235	2.07884	0.0376324	0.149902	EPHB4
ENSG00000269609	489.678	0.222863	0.0818052	2.72432	0.00644345	0.044778	RPARP-AS1
ENSG00000120158	323.457	0.222462	0.0760767	2.92418	0.00345364	0.0292068	RCL1
ENSG00000054148	336.963	0.222039	0.081847	2.71285	0.0066707	0.0456918	PHPT1
ENSG00000223803	126.226	0.222003	0.109489	2.02762	0.042599	0.162741	RPS20P14
ENSG00000105072	104.829	0.221987	0.111733	1.98676	0.0469487	0.173831	C19orf44
ENSG00000163584	462.694	0.221916	0.0921668	2.40777	0.0160504	0.084099	RPL22L1
ENSG00000228903	391.914	0.221819	0.100114	2.21568	0.0267137	0.119184	RASA4CP
ENSG00000234284	204.565	0.221467	0.103293	2.14406	0.0320278	0.134689	ZNF879
ENSG00000111696	207.501	0.221451	0.0984973	2.2483	0.0245571	0.112774	NT5DC3
ENSG00000163389	991.061	0.221338	0.0631365	3.50571	0.000455389	0.00757773	POGLUT1
ENSG00000115541	282.785	0.221243	0.0902226	2.45219	0.0141991	0.077117	HSPE1
ENSG00000119285	1548.49	0.221224	0.0556474	3.97546	7.02444e-05	0.00206926	HEATR1
ENSG00000167658	42059.1	0.221069	0.0655696	3.37152	0.000747533	0.0103972	EEF2
ENSG00000154358	2500.42	0.221042	0.093576	2.36216	0.0181686	0.0915101	OBSCN
ENSG00000130204	879.034	0.220908	0.105134	2.1012	0.0356234	0.14487	TOMM40
ENSG00000135632	528.805	0.220874	0.0675669	3.26896	0.00107944	0.0134464	SMYD5
ENSG00000162244	10317.1	0.220678	0.0645293	3.4198	0.000626661	0.00931966	RPL29
ENSG00000167232	1364.12	0.220165	0.0532562	4.13406	3.56408e-05	0.00131237	ZNF91
ENSG00000115604	398.886	0.220018	0.108044	2.03638	0.041712	0.160464	IL18R1
ENSG00000198498	294.373	0.220005	0.0789264	2.78747	0.0053122	0.0392307	TMA16
ENSG00000155016	269.083	0.21987	0.0900569	2.44146	0.0146282	0.0787654	CYP2U1
ENSG00000115053	12810	0.219779	0.0529676	4.1493	3.33487e-05	0.00124874	NCL
ENSG00000159899	131.361	0.219771	0.108343	2.02848	0.0425112	0.162445	NPR2
ENSG00000104894	8250.78	0.219745	0.074246	2.95969	0.00307951	0.0271339	CD37
ENSG00000155287	1000.89	0.21966	0.0927973	2.36709	0.0179285	0.0907643	SLC25A28
ENSG00000103351	512.753	0.21957	0.0898847	2.44279	0.0145742	0.0785169	CLUAP1
ENSG00000179886	234.454	0.219356	0.0927118	2.366	0.0179812	0.0909165	TIGD5
ENSG00000236088	285.012	0.218952	0.0870867	2.51418	0.0119309	0.0682762	COX10-AS1
ENSG00000198763	52873.7	0.218918	0.0983889	2.22503	0.0260792	0.117082	MT-ND2
ENSG00000174428	905.882	0.21876	0.0675541	3.23829	0.00120247	0.0144241	GTF2IRD2B
ENSG00000181090	2320.75	0.218758	0.048874	4.47596	7.6067e-06	0.000448918	EHMT1
ENSG00000104529	2658.92	0.218748	0.0612265	3.57276	0.000353242	0.00635772	EEF1D
ENSG00000111850	156.48	0.218725	0.110738	1.97516	0.0482504	0.176939	SMIM8
ENSG00000150787	153.605	0.217735	0.103472	2.10429	0.0353535	0.144164	PTS
ENSG00000185875	214.534	0.217622	0.100062	2.17487	0.0296401	0.128091	THNSL1
ENSG00000204514	679.38	0.217229	0.0555608	3.90975	9.23904e-05	0.00251232	ZNF814
ENSG00000182919	430.734	0.21715	0.0544191	3.99033	6.59817e-05	0.00197925	C11orf54
ENSG00000281026	311.405	0.217087	0.0940872	2.3073	0.0210381	0.10127	N4BP2L2-IT2
ENSG00000108773	1736.39	0.216862	0.0837141	2.59051	0.0095834	0.0588741	KAT2A
ENSG00000204576	423.207	0.216426	0.051713	4.18514	2.84995e-05	0.00110908	PRR3
ENSG00000099901	807.383	0.216353	0.0610579	3.54341	0.000394985	0.00685096	RANBP1
ENSG00000123545	316.951	0.216346	0.0990025	2.18526	0.0288701	0.125648	NDUFAF4
ENSG00000224631	3498.23	0.216049	0.0739643	2.92099	0.00348918	0.0293835	RPS27AP16
ENSG00000204272	335.404	0.215973	0.10916	1.97851	0.0478714	0.175929	NBDY
ENSG00000144713	13171.8	0.215596	0.0647351	3.33044	0.000867102	0.011418	RPL32
ENSG00000014138	94.3959	0.21553	0.106577	2.02229	0.0431467	0.164146	POLA2
ENSG00000131469	8410.13	0.215416	0.0690103	3.12151	0.00179927	0.0188651	RPL27
ENSG00000233184	564.183	0.215325	0.10594	2.03251	0.0421019	0.161456
ENSG00000121210	2453.17	0.21526	0.0540782	3.98054	6.87599e-05	0.00204123	TMEM131L
ENSG00000158411	1566.79	0.215069	0.0816473	2.63413	0.00843537	0.0538761	MITD1
ENSG00000162496	824.461	0.214919	0.0956335	2.24732	0.0246198	0.112972	DHRS3
ENSG00000096384	21900.6	0.214866	0.075549	2.84406	0.00445429	0.0348766	HSP90AB1
ENSG00000189362	475.006	0.214748	0.0611535	3.51163	0.000445374	0.00748268	NEMP2
ENSG00000198840	11842	0.214719	0.0779615	2.75417	0.00588415	0.042066	MT-ND3
ENSG00000117479	232.848	0.214588	0.0835915	2.5671	0.0102553	0.0617842	SLC19A2
ENSG00000175322	97.6664	0.214413	0.112279	1.90964	0.0561799	0.196141	ZNF519
ENSG00000198242	2873.35	0.214319	0.0814301	2.63194	0.00849001	0.0541077	RPL23A
ENSG00000124193	7640.51	0.214231	0.0448546	4.77613	1.78702e-06	0.000157399	SRSF6
ENSG00000123131	303.07	0.214013	0.103731	2.06315	0.0390986	0.153789	PRDX4
ENSG00000180626	372.581	0.213998	0.0834597	2.56409	0.0103447	0.062192	ZNF594
ENSG00000125485	647.377	0.213972	0.0673182	3.17852	0.00148029	0.016568	DDX31
ENSG00000065268	505.5	0.213872	0.0956639	2.23566	0.0253739	0.115048	WDR18
ENSG00000236552	3067.23	0.213709	0.0910932	2.34605	0.0189735	0.094458	RPL13AP5
ENSG00000116830	708.258	0.213662	0.0802142	2.66364	0.00772997	0.0508107	TTF2
ENSG00000149218	382.306	0.21361	0.0934331	2.28623	0.0222406	0.105166	ENDOD1
ENSG00000153574	840.349	0.213547	0.062753	3.40298	0.000666555	0.00966732	RPIA
ENSG00000136874	677.397	0.213306	0.109658	1.9452	0.0517515	0.185734	STX17
ENSG00000095066	451.484	0.213219	0.0924554	2.30618	0.0211006	0.101497	HOOK2
ENSG00000005175	1049.33	0.213215	0.0579655	3.67831	0.000234783	0.00478824	RPAP3
ENSG00000198911	4649.21	0.212797	0.0487289	4.36694	1.25997e-05	0.000627423	SREBF2
ENSG00000103522	1400.36	0.212664	0.0954171	2.22878	0.0258283	0.116477	IL21R
ENSG00000188404	19623.4	0.21244	0.0835421	2.54291	0.0109934	0.0647535	SELL
ENSG00000197448	3282.49	0.212396	0.0787175	2.69821	0.00697144	0.0470567	GSTK1
ENSG00000118308	1288.07	0.212093	0.0914834	2.31837	0.020429	0.0993143	LRMP
ENSG00000105245	273.821	0.212083	0.111541	1.90139	0.0572514	0.198876	NUMBL
ENSG00000132879	849.43	0.211672	0.0779099	2.71688	0.00659007	0.0453842	FBXO44
ENSG00000185513	354.414	0.21164	0.0806539	2.62405	0.0086892	0.0550075	L3MBTL1
ENSG00000153283	4436.5	0.21163	0.0626576	3.37757	0.000731286	0.0102339	CD96
ENSG00000168395	1310.05	0.21161	0.0558588	3.78831	0.000151678	0.00353025	ING5
ENSG00000278619	197.064	0.211572	0.0795758	2.65874	0.00784324	0.0514037	MRM1
ENSG00000129675	3747.93	0.211527	0.0576686	3.66798	0.000244476	0.00493514	ARHGEF6
ENSG00000177600	11143.3	0.210737	0.0596404	3.53346	0.000410151	0.00704123	RPLP2
ENSG00000131876	1159.44	0.210652	0.0505365	4.16831	3.0686e-05	0.0011747	SNRPA1
ENSG00000130299	525.017	0.210553	0.0769859	2.73495	0.0062389	0.0437464	GTPBP3
ENSG00000162885	175.415	0.210343	0.100909	2.08447	0.0371171	0.148598	B3GALNT2
ENSG00000010803	326.467	0.210262	0.0700993	2.99949	0.00270429	0.0249736	SCMH1
ENSG00000147905	836.687	0.210137	0.0749098	2.8052	0.0050285	0.0377523	ZCCHC7
ENSG00000134324	2505.24	0.210007	0.108802	1.93016	0.0535865	0.190646	LPIN1
ENSG00000184220	287.994	0.209977	0.0847757	2.47685	0.0132548	0.0735904	CMSS1
ENSG00000054654	13979.2	0.209944	0.0991114	2.11826	0.0341527	0.140879	SYNE2
ENSG00000213918	1260.73	0.20944	0.0765565	2.73575	0.00622377	0.0437167	DNASE1
ENSG00000185189	402.661	0.209206	0.0909782	2.29951	0.0214758	0.102785	NRBP2
ENSG00000151729	113.7	0.209167	0.0945602	2.21199	0.0269671	0.120021	SLC25A4
ENSG00000164934	857.395	0.209095	0.0827046	2.52822	0.0114643	0.0664929	DCAF13
ENSG00000145391	572.162	0.208966	0.085389	2.44722	0.0143964	0.0778935	SETD7
ENSG00000261236	792.64	0.20865	0.0895335	2.33041	0.0197844	0.0971535	BOP1
ENSG00000035141	854.091	0.20863	0.0595747	3.502	0.000461788	0.00766514	FAM136A
ENSG00000006625	150.81	0.2086	0.0915183	2.27933	0.0226478	0.106426	GGCT
ENSG00000110700	8296.89	0.208198	0.0696515	2.98913	0.00279769	0.02552	RPS13
ENSG00000261971	1206.48	0.20817	0.100386	2.07369	0.0381077	0.151135	MMP25-AS1
ENSG00000206053	998.599	0.208138	0.0562499	3.70023	0.000215408	0.0045265	JPT2
ENSG00000198918	7386.46	0.208116	0.0572943	3.63241	0.00028079	0.00546546	RPL39
ENSG00000105447	842.216	0.207694	0.0825405	2.51626	0.0118607	0.0681029	GRWD1
ENSG00000125885	551.671	0.207635	0.102829	2.01923	0.0434635	0.164944	MCM8
ENSG00000139192	988.706	0.207487	0.0755839	2.74511	0.00604897	0.042864	TAPBPL
ENSG00000203709	277.137	0.207485	0.0988334	2.09934	0.0357869	0.145312	MIR29B2CHG
ENSG00000118181	9320.77	0.207179	0.0730863	2.83472	0.00458652	0.0354806	RPS25
ENSG00000237943	1217.58	0.20703	0.089282	2.31883	0.020404	0.0992648	PRKCQ-AS1
ENSG00000164307	3792.79	0.206785	0.0787819	2.62478	0.00867047	0.0549239	ERAP1
ENSG00000143486	1105.63	0.206756	0.0562086	3.67838	0.000234724	0.00478824	EIF2D
ENSG00000136247	302.193	0.206641	0.0681376	3.0327	0.00242375	0.0230458	ZDHHC4
ENSG00000183207	782.95	0.205867	0.0643799	3.1977	0.00138529	0.015913	RUVBL2
ENSG00000249353	1226.35	0.205806	0.0818747	2.51367	0.0119482	0.068293	NPM1P27
ENSG00000179409	1001.84	0.20578	0.0540464	3.80747	0.000140397	0.00335132	GEMIN4
ENSG00000023445	15014.2	0.205705	0.108058	1.90365	0.0569555	0.19821	BIRC3
ENSG00000116455	486.476	0.205385	0.0574738	3.57354	0.000352193	0.00635255	WDR77
ENSG00000132780	2527.5	0.20527	0.0551992	3.71872	0.000200234	0.00427024	NASP
ENSG00000104738	450.789	0.205191	0.0834777	2.45803	0.0139701	0.0762862	MCM4
ENSG00000139343	422.858	0.205142	0.0720785	2.84609	0.00442601	0.0347365	SNRPF
ENSG00000279088	267.484	0.205118	0.0780813	2.62698	0.00861456	0.0546788
ENSG00000127586	585.815	0.205021	0.0781349	2.62394	0.00869188	0.0550075	CHTF18
ENSG00000074201	1257.23	0.205017	0.0589668	3.47683	0.000507381	0.00816101	CLNS1A
ENSG00000263266	900.092	0.204904	0.077719	2.63647	0.0083774	0.0537012	RPS7P1
ENSG00000005022	2775.74	0.204707	0.0568324	3.60194	0.000315848	0.00597965	SLC25A5
ENSG00000244313	1094.19	0.204319	0.0824974	2.47667	0.0132615	0.0735982
ENSG00000156469	443.202	0.204258	0.0653481	3.12569	0.00177391	0.0187751	MTERF3
ENSG00000180257	322.298	0.203899	0.0858072	2.37625	0.0174898	0.0892547	ZNF816
ENSG00000145781	263.007	0.20386	0.10725	1.90079	0.0573298	0.198944	COMMD10
ENSG00000128973	333.989	0.203835	0.0819686	2.48675	0.0128916	0.0723254	CLN6
ENSG00000184675	364.059	0.203707	0.0812623	2.50678	0.0121837	0.0693229	AMER1
ENSG00000280927	138.19	0.203538	0.101097	2.01329	0.0440836	0.166605	CTBP1-AS
ENSG00000063177	10546	0.203479	0.0546559	3.72291	0.000196938	0.00422905	RPL18
ENSG00000123352	310.625	0.203443	0.0759423	2.67892	0.00738605	0.0490961	SPATS2
ENSG00000187601	385.913	0.203314	0.0741472	2.74203	0.00610605	0.0431618	MAGEH1
ENSG00000268027	363.098	0.203056	0.0960952	2.11307	0.0345944	0.141885
ENSG00000173611	812.492	0.202986	0.0734153	2.7649	0.00569401	0.0411923	SCAI
ENSG00000106460	1442.97	0.20273	0.0742419	2.73067	0.00632066	0.0441962	TMEM106B
ENSG00000167113	708.38	0.202691	0.0567252	3.57321	0.000352638	0.00635255	COQ4
ENSG00000117543	651.868	0.20247	0.0619861	3.26638	0.00108934	0.0135277	DPH5
ENSG00000232593	452.125	0.202263	0.086942	2.32642	0.0199963	0.0978032	KANTR
ENSG00000115758	2433.17	0.202083	0.0673092	3.0023	0.00267946	0.0247908	ODC1
ENSG00000214706	653.505	0.202062	0.074656	2.70657	0.00679818	0.0462774	IFRD2
ENSG00000158987	1857.75	0.20199	0.0747914	2.70072	0.00691899	0.0467982	RAPGEF6
ENSG00000236603	134.088	0.201961	0.0989504	2.04104	0.0412473	0.159459	RANP1
ENSG00000234741	3378.39	0.201885	0.0862231	2.34143	0.01921	0.0950692	GAS5
ENSG00000140263	262.824	0.201772	0.102914	1.96059	0.0499269	0.181225	SORD
ENSG00000184209	497.295	0.201482	0.0587705	3.42828	0.000607415	0.00914389	SNRNP35
ENSG00000119403	2048.45	0.201341	0.0533693	3.77261	0.000161548	0.00366322	PHF19
ENSG00000177192	625.082	0.201324	0.0672395	2.99413	0.00275228	0.0253013	PUS1
ENSG00000162613	4047.87	0.201302	0.052489	3.83514	0.000125494	0.0031015	FUBP1
ENSG00000133706	3227.38	0.201266	0.0666527	3.01963	0.00253085	0.0237888	LARS
ENSG00000275835	344.703	0.201154	0.0788235	2.55196	0.010712	0.0637111	TUBGCP5
ENSG00000138796	523.553	0.199727	0.0639975	3.12085	0.00180329	0.0188974	HADH
ENSG00000166508	2683.13	0.199693	0.050744	3.93531	8.30904e-05	0.00234157	MCM7
ENSG00000134419	1563.59	0.199603	0.0824753	2.42015	0.0155139	0.0824507	RPS15A
ENSG00000160783	255.014	0.199569	0.0705309	2.82953	0.00466161	0.0358015	PMF1
ENSG00000166197	3014.86	0.199484	0.0600771	3.32047	0.00089865	0.0117105	NOLC1
ENSG00000163811	1509.55	0.199033	0.0577964	3.44369	0.000573837	0.00881084	WDR43
ENSG00000180035	372.667	0.198935	0.0657683	3.02479	0.00248803	0.0234192	ZNF48
ENSG00000059573	1017.83	0.198883	0.0751008	2.64821	0.00809198	0.0524007	ALDH18A1
ENSG00000139675	2218.97	0.198706	0.0702393	2.82899	0.00466949	0.0358482	HNRNPA1L2
ENSG00000110888	1036.14	0.198697	0.055377	3.58808	0.000333119	0.00612743	CAPRIN2
ENSG00000214135	694.017	0.198599	0.096806	2.05151	0.040217	0.156548
ENSG00000134987	1254.01	0.198529	0.0566998	3.5014	0.000462818	0.00766716	WDR36
ENSG00000105193	12316.8	0.198447	0.0647605	3.06432	0.00218164	0.0215036	RPS16
ENSG00000099956	1291.48	0.198252	0.058371	3.39642	0.000682747	0.00982176	SMARCB1
ENSG00000172922	629.882	0.198144	0.0667984	2.96629	0.00301415	0.0268002	RNASEH2C
ENSG00000171806	270.688	0.198015	0.0875363	2.26209	0.0236919	0.109778	METTL18
ENSG00000263272	184.132	0.197865	0.0957993	2.06542	0.0388837	0.153274
ENSG00000153094	2843.17	0.197808	0.0854717	2.31431	0.0206508	0.100029	BCL2L11
ENSG00000187514	18611.4	0.197718	0.0579918	3.40941	0.000651033	0.00953645	PTMA
ENSG00000161298	297.052	0.197637	0.0622677	3.17399	0.00150357	0.0167353	ZNF382
ENSG00000105738	1412.08	0.197525	0.0755271	2.61528	0.00891535	0.0560154	SIPA1L3
ENSG00000165732	5529.68	0.197487	0.0872539	2.26336	0.0236133	0.109624	DDX21
ENSG00000133935	356.804	0.197329	0.0807206	2.44459	0.0145017	0.0783019	ERG28
ENSG00000104408	6792.62	0.197297	0.0729368	2.70504	0.00682971	0.0464134	EIF3E
ENSG00000154511	498.207	0.197012	0.0729401	2.70101	0.006913	0.0467892	DIPK1A
ENSG00000267002	516.626	0.1968	0.0822146	2.39374	0.0166776	0.0862816
ENSG00000127580	240.509	0.19672	0.0811443	2.42432	0.0153369	0.0816613	WDR24
ENSG00000144451	123.41	0.196582	0.100905	1.9482	0.0513913	0.184824	SPAG16
ENSG00000139746	4284.72	0.19651	0.0487095	4.03433	5.47582e-05	0.00174811	RBM26
ENSG00000273344	232.07	0.196008	0.0965696	2.0297	0.0423866	0.162084	PAXIP1-AS1
ENSG00000173715	254.821	0.195979	0.090645	2.16205	0.0306144	0.131066	C11orf80
ENSG00000105373	8161.91	0.195951	0.0927068	2.11366	0.034544	0.141797	NOP53
ENSG00000104852	9287.34	0.195436	0.0551084	3.54639	0.000390545	0.00682111	SNRNP70
ENSG00000167615	14328.8	0.195328	0.0571754	3.4163	0.000634793	0.00937962	LENG8
ENSG00000078596	2716.62	0.195247	0.0704832	2.77011	0.00560368	0.0407444	ITM2A
ENSG00000167112	473.362	0.195057	0.0650329	2.99936	0.00270543	0.0249736	TRUB2
ENSG00000269343	409.985	0.194862	0.062056	3.1401	0.00168893	0.0181151	ZNF587B
ENSG00000126749	619.338	0.194499	0.0542006	3.5885	0.000332586	0.00612324	EMG1
ENSG00000111602	875.71	0.19447	0.0855748	2.27251	0.0230555	0.107825	TIMELESS
ENSG00000213740	111.616	0.194268	0.0974322	1.99388	0.0461653	0.171959	SERBP1P1
ENSG00000124784	678.391	0.194261	0.0622808	3.11912	0.00181391	0.018937	RIOK1
ENSG00000197808	238.706	0.194211	0.0772808	2.51305	0.0119692	0.0683544	ZNF461
ENSG00000173465	259.432	0.193867	0.0768887	2.5214	0.0116889	0.0674449	SSSCA1
ENSG00000226084	3448.66	0.193726	0.0697685	2.7767	0.00549143	0.0402344
ENSG00000175061	1964.42	0.193645	0.08861	2.18537	0.028862	0.125648	LRRC75A-AS1
ENSG00000187824	196.249	0.193565	0.0970954	1.99356	0.0462006	0.172046	TMEM220
ENSG00000085415	950.974	0.193382	0.0851975	2.26981	0.0232191	0.108312	SEH1L
ENSG00000025772	558.383	0.193347	0.0789871	2.44783	0.0143718	0.0777814	TOMM34
ENSG00000089009	15355.1	0.193273	0.0669907	2.88507	0.00391321	0.031871	RPL6
ENSG00000116120	722.176	0.193265	0.0778332	2.48307	0.0130254	0.0728728	FARSB
ENSG00000159753	2727.42	0.192953	0.0597097	3.23152	0.00123132	0.0146561	CARMIL2
ENSG00000132424	8810.77	0.19259	0.050603	3.8059	0.000141289	0.00336346	PNISR
ENSG00000136444	1198.26	0.192342	0.0503515	3.81997	0.000133466	0.00323477	RSAD1
ENSG00000139146	1660.58	0.192296	0.0608052	3.16249	0.00156426	0.0171071	SINHCAF
ENSG00000100316	31216.8	0.192244	0.0795347	2.41711	0.0156444	0.0828588	RPL3
ENSG00000166532	1020.55	0.192175	0.0745402	2.57815	0.00993318	0.0605158	RIMKLB
ENSG00000133119	154.975	0.192156	0.0935274	2.05454	0.0399231	0.155992	RFC3
ENSG00000214029	425.382	0.19194	0.0728149	2.63599	0.00838918	0.0537357	ZNF891
ENSG00000103168	1767.14	0.191726	0.0777164	2.467	0.0136252	0.0750562	TAF1C
ENSG00000143971	503.626	0.191626	0.0571004	3.35594	0.000790944	0.0107904	ETAA1
ENSG00000174365	109.137	0.191571	0.092556	2.06978	0.038473	0.152133	SNHG11
ENSG00000143951	133.549	0.191533	0.0876644	2.18484	0.0289004	0.125753	WDPCP
ENSG00000183814	164.846	0.191304	0.0903643	2.11703	0.0342575	0.141111	LIN9
ENSG00000155380	488.033	0.191123	0.0911014	2.09791	0.0359128	0.145537	SLC16A1
ENSG00000067606	144.195	0.191117	0.0960283	1.99021	0.0465674	0.172962	PRKCZ
ENSG00000218227	180.372	0.191055	0.0927189	2.06059	0.0393423	0.154445
ENSG00000170222	353.786	0.191013	0.0737717	2.58925	0.00961853	0.0589748	ADPRM
ENSG00000048162	316.314	0.19101	0.0877049	2.17787	0.0294156	0.127384	NOP16
ENSG00000143799	3991.43	0.190985	0.0624434	3.05852	0.0022243	0.0218169	PARP1
ENSG00000084774	1979.32	0.190904	0.0579598	3.29373	0.00098869	0.0125619	CAD
ENSG00000183527	240.182	0.190833	0.0793314	2.40552	0.0161496	0.084442	PSMG1
ENSG00000142207	1047.17	0.190656	0.0809921	2.35401	0.0185723	0.0929681	URB1
ENSG00000160991	3742.21	0.19056	0.0850552	2.24043	0.0250631	0.114285	ORAI2
ENSG00000183751	776.67	0.190439	0.0684921	2.78046	0.00542826	0.0398443	TBL3
ENSG00000169964	302.669	0.190084	0.0733168	2.59264	0.00952423	0.0587016	TMEM42
ENSG00000173145	759.386	0.190072	0.0697732	2.72415	0.0064468	0.0447817	NOC3L
ENSG00000104522	796.334	0.190067	0.0526225	3.61189	0.000303975	0.00580968	TSTA3
ENSG00000204946	870.345	0.190015	0.0519875	3.65502	0.000257161	0.00511468	ZNF783
ENSG00000161016	16903	0.18955	0.0585167	3.23924	0.00119849	0.0144079	RPL8
ENSG00000244398	913.452	0.189546	0.0676178	2.8032	0.00505987	0.037913
ENSG00000279059	148.535	0.18951	0.0886224	2.1384	0.0324841	0.13598
ENSG00000160799	595.473	0.189366	0.0713161	2.6553	0.00792373	0.0516599	CCDC12
ENSG00000176022	583.324	0.189224	0.0922351	2.05154	0.0402144	0.156548	B3GALT6
ENSG00000198585	368.726	0.189162	0.0794682	2.38035	0.0172961	0.0885455	NUDT16
ENSG00000110060	360.674	0.189093	0.0881039	2.14625	0.0318528	0.134206	PUS3
ENSG00000115419	5327.34	0.189075	0.0949789	1.9907	0.0465137	0.172848	GLS
ENSG00000263753	790.075	0.189002	0.0989636	1.90982	0.0561568	0.196094	LINC00667
ENSG00000126756	577.497	0.188971	0.0684991	2.75874	0.00580239	0.0417207	UXT
ENSG00000198886	97875.9	0.188956	0.0598903	3.15504	0.00160474	0.0174358	MT-ND4
ENSG00000176953	3166.09	0.188924	0.0660886	2.85864	0.00425459	0.0337075	NFATC2IP
ENSG00000272335	137.172	0.188772	0.0992138	1.90268	0.0570825	0.198521
ENSG00000074582	556.794	0.188443	0.066145	2.84894	0.00438653	0.0344941	BCS1L
ENSG00000101019	764.891	0.188262	0.0578885	3.25214	0.00114538	0.0139736	UQCC1
ENSG00000088808	409.046	0.188137	0.0817023	2.30272	0.0212947	0.102235	PPP1R13B
[truncated: 3,859 more rows]

## Sheet: Supplementary Table D
Supplementary Table 8D: Differentially expressed genes between CMV-infected vs CMV-uninfected infants
[truncated: 4,331 more rows]
