# Supplementary material for: Inflammation and immune activation are associated with risk of Mycobacterium tuberculosis infection in BCG-vaccinated infants
Source: Research Square preprint supplement (doi:10.21203/rs.3.rs-1632594/v1), 2022-05-17
Supplement: Supplementary file 5 [file 84fb8b257c481c70d8476260.xlsx]

## Sheet: Supplementary Table 9A
Supplementary Table 9A: Upregulated genes in enriched gene sets. CERNO algorithm and gene sets defined by Li et.al., Nat. Immunol., 2014 [14] are used in gene set enrichment
M.tb-infected vs M.tb-uninfected (All infants)				CMV-infected vs CMV-uninfected				M.tb-infected vs M.tb-uninfected (CMV-infected infants)				M.tb-infected vs M.tb-uninfected (CMV-uninfected infants)
ID	N	Genes	Name	ID	N	Genes	Name	ID	N	Genes	Name	ID	N	Genes	Name
LI.M156.1	12	IGKV4-1,IGHA1,IGHG1,TNFRSF17,IGKC,IGLV3-19,IGKV3-20,IGHV3-48,IGLV2-23,IGKV1-5,IGLV1-44,IGLV4-60	plasma cells, immunoglobulins	LI.M156.1	8	IGKV4-1,IGHA1,IGHG1,IGKC,IGKV1D-13,IGLV3-19,IGKV3-20,IGKV1-5	plasma cells, immunoglobulins	LI.M156.1	15	IGKV4-1,IGHA1,IGHG1,TNFRSF17,IGKC,IGLV3-19,IGKV3-20,IGHD,IGHV3-48,PNOC,IGLV2-23,IGHM,IGKV1-5,IGLV1-44,IGLV4-60	plasma cells, immunoglobulins	LI.M156.1	17	IGKV4-1,IGHA1,TNFRSF17,IGKC,TXNDC5,DERL3,IGKV3-20,IGHD,IGHV3-48,PNOC,IGLV2-23,IGHM,IGKV1-5,POU2AF1,IGLV1-44,IGLV4-60,IGLL5	plasma cells, immunoglobulins
LI.M156.0	10	IGKV4-1,IGHG1,IGKC,IGLV4-60,IGLV3-19,SPIB,IGKV3-20,IGLV2-23,TNFRSF17,IGLV1-44	plasma cells & B cells, immunoglobulins	LI.M156.0	8	CD52,IGKV4-1,IGHG1,IGKC,IGKV1D-13,ITM2C,IGLV3-19,IGKV3-20	plasma cells & B cells, immunoglobulins	LI.M156.0	16	IGKV4-1,IGHG1,IGKC,IGLV4-60,IGLV3-19,ADAM28,STAP1,ABCB4,FCRL1,SPIB,IGKV3-20,IGHD,IGLV2-23,TNFRSF17,IGLV1-44,GNG7	plasma cells & B cells, immunoglobulins	LI.M156.0	23	IGKV4-1,IGKC,VPREB3,IGLV4-60,P2RX5,CPNE5,STAP1,ABCB4,FCRL1,FCRL2,PCDH9,CD22,SPIB,IGKV3-20,IGHD,BLK,IGLV2-23,OSBPL10,E2F5,TNFRSF17,IGLV1-44,GNG7,IGLL5	plasma cells & B cells, immunoglobulins
LI.M4.4	8	POLA1,CDC6,PRIM2,MCM10,MCM5,MCM4,MCM2,MCM8	mitotic cell cycle - DNA replication	LI.M4.4	12	POLA1,PLK4,KIF15,CDC7,STIL,CDT1,PRIM2,PCNA,MCM10,TPX2,MCM4,PARPBP	mitotic cell cycle - DNA replication	LI.M4.4	13	POLA1,PLK4,CDC6,STIL,PRIM2,MCM10,TPX2,MCM5,MCM4,MCM2,MCM8,PARPBP,RPA2	mitotic cell cycle - DNA replication	LI.M4.4	0		mitotic cell cycle - DNA replication
LI.M47.1	4	IGHA1,KLHL14,FCRLA,FCGR2B	enriched in B cells (II)	LI.M47.1	0		enriched in B cells (II)	LI.M47.1	29	IGHA1,BCL11A,CD79B,CD79A,CDK14,CXCR5,BANK1,MS4A1,FCRL5,BLNK,TCF4,SP140,KLHL14,RALGPS2,FCRLA,FCGR2B,TCL1A,CELSR1,CD24,DENND5B,EBF1,PNOC,CD180,IGHM,PAX5,PLEKHG1,PKIG,HLA-DOB,CD19	enriched in B cells (II)	LI.M47.1	31	IGHA1,BCL11A,CD79B,CD79A,TPD52,CXCR5,BANK1,MS4A1,BLNK,TCF4,SP140,KLHL14,RALGPS2,FCRLA,FCGR2B,TCL1A,CELSR1,CD24,DENND5B,PNOC,PAWR,IGHM,CR2,PAX5,PLEKHG1,POU2AF1,PKIG,HLA-DOB,KLF8,PTPRK,CD19	enriched in B cells (II)
LI.M47.2	7	IGHA1,IGKC,MEF2C,FCRLA,FCGR2B,IGLV1-44,HLA-DOA	enriched in B cells (III)	LI.M47.2	0		enriched in B cells (III)	LI.M47.2	21	IGHA1,IGKC,MEF2C,CDK14,FCRL3,FCRL5,HHEX,TBC1D9,FCRLA,ALOX5,FCGR2B,CELSR1,CD24,IGHD,PNOC,CD180,IGLV1-44,HLA-DOA,HLA-DQA1,BTK,DENND5B	enriched in B cells (III)	LI.M47.2	15	IGHA1,IGKC,VPREB3,MEF2C,TPD52,FCRLA,FCGR2B,CELSR1,CD24,IGHD,PNOC,PAWR,IGLV1-44,HLA-DOA,DENND5B	enriched in B cells (III)
LI.M47.3	5	CIITA,IGHA1,IGHG1,MEF2C,HLA-DOA	enriched in B cells (IV)	LI.M47.3	0		enriched in B cells (IV)	LI.M47.3	10	CIITA,IGHA1,TLR10,IGHG1,CELSR1,CDK14,CD180,MEF2C,BTK,HLA-DOA	enriched in B cells (IV)	LI.M47.3	9	CPNE5,TPD52,CIITA,IGHA1,TLR10,CELSR1,PAWR,MEF2C,HLA-DOA	enriched in B cells (IV)
LI.M47.0	4	FCRLA,SPIB,KLHL14,IGKV3-20	enriched in B cells (I)	LI.M47.0	0		enriched in B cells (I)	LI.M47.0	31	STAP1,CD72,TSPAN13,BCL11A,CD79B,CD79A,AFF3,IGHM,FCRLA,SPIB,ABCB4,FCRL1,BANK1,MS4A1,FCRL5,TCF4,KLHL14,CXCR5,RALGPS2,TCL1A,CD24,IGKV3-20,IGHD,EBF1,PNOC,ADAM28,PAX5,PLEKHG1,PKIG,HLA-DOB,CD19	enriched in B cells (I)	LI.M47.0	39	STAP1,BLK,CD72,TSPAN13,BCL11A,CD200,CD79B,VPREB3,CD79A,P2RX5,AFF3,IGHM,FCRLA,SPIB,FAM129C,ABCB4,FCRL1,BANK1,MS4A1,TCF4,KLHL14,CXCR5,PCDH9,RALGPS2,CD22,TCL1A,CD24,IGKV3-20,IGHD,PNOC,CR2,PAX5,E2F5,PLEKHG1,PKIG,FCRL2,HLA-DOB,PTPRK,CD19	enriched in B cells (I)
LI.M4.1	19	BRCA1,FEN1,CHEK1,SUV39H2,ZWILCH,GINS1,SMC2,RFC3,CDC6,HELLS,POLA1,CHAF1B,DNA2,TIPIN,MCM10,MCM5,MCM4,MCM2,RFC4	cell cycle (I)	LI.M4.1	82	BUB1B,PLK1,PLK4,KIF2C,SKA1,TPX2,DLGAP5,CENPN,CENPK,CENPF,CENPE,CENPA,KIFC1,H2AFX,KIF23,CCNF,NCAPH,NCAPG,TOP2A,SPC24,SPC25,KIF11,ZWINT,TTK,BUB1,CDC25C,ZWILCH,PBK,UBE2C,CDC20,MELK,DTYMK,SMC2,RFC5,CDT1,RFC3,KIF15,FOXM1,FBXO5,BRIP1,NDC80,CDC7,RACGAP1,ASPM,CKS1B,FANCI,HELLS,CKS2,PTTG1,UHRF1,CDK1,KIF20B,KIF20A,MKI67,POLA1,MAD2L1,BIRC5,CEP55,CHAF1B,FAM83D,DNA2,CCNA2,ECT2,TIPIN,CDKN3,NUF2,CDCA2,CDCA3,SKA…	cell cycle (I)	LI.M4.1	31	PLK4,TPX2,SPDL1,BRCA1,CENPI,KIF11,FEN1,TIMELESS,ZWILCH,GINS1,MELK,SMC2,RFC3,PRKAR2B,BRIP1,CDC6,HELLS,KIF20B,MKI67,POLA1,CEP55,CHAF1B,DNA2,ECT2,TIPIN,CDCA8,MCM10,MCM5,MCM4,MCM2,TUBG1	cell cycle (I)	LI.M4.1	15	MYBL2,STMN1,TIMELESS,DTYMK,POLA2,RFC3,FANCD2,ERCC6L,CKS1B,RANBP1,POLA1,KIF18A,MCM5,MCM4,MCM2	cell cycle (I)
LI.M200	3	HLA-DPB1,HLA-DPA1,HLA-DQA2	antigen processing and presentation	LI.M200	0		antigen processing and presentation	LI.M200	7	HLA-DPB1,WDFY4,HLA-DPA1,HLA-DMB,METTL7A,HLA-DQA2,HLA-DMA	antigen processing and presentation	LI.M200	0		antigen processing and presentation
LI.M218	3	POT1,SLC35A5,ELP3	TBA	LI.M218	0		TBA	LI.M218	7	ATG4C,TIMMDC1,SLC35B3,POT1,HPS5,SLC35A5,ELP3	TBA	LI.M218	0		TBA
LI.M22.0	5	POLA1,RFC4,CHEK1,RFC3,SMC2	mismatch repair (I)	LI.M22.0	9	POLA1,RFC5,BUB1,RACGAP1,ZWINT,PCNA,CENPK,RFC3,SMC2	mismatch repair (I)	LI.M22.0	0		mismatch repair (I)	LI.M22.0	0		mismatch repair (I)
LI.M127	2	IFIH1,IFIT1	type I interferon response	LI.M127	0		type I interferon response	LI.M127	10	TAP1,IFIH1,IRF7,PARP9,PLSCR1,HERC5,DDX60,USP18,RSAD2,IFIT1	type I interferon response	LI.M127	0		type I interferon response
LI.M111.1	2	BST2,IFIT2	viral sensing & immunity; IRF2 targets network (II)	LI.M111.1	0		viral sensing & immunity; IRF2 targets network (II)	LI.M111.1	8	TAP1,DDX58,ZBP1,CASP1,PSMB8,BST2,USP18,IFIT2	viral sensing & immunity; IRF2 targets network (II)	LI.M111.1	0		viral sensing & immunity; IRF2 targets network (II)
LI.M146	4	CD74,HLA-DPB1,HLA-DRA,HLA-DPA1	MHC-TLR7-TLR8 cluster	LI.M146	0		MHC-TLR7-TLR8 cluster	LI.M146	9	CD74,HLA-DPB1,HLA-DRA,HLA-B,HLA-DRB1,HLA-DPA1,TLR8,HLA-DQA1,TLR7	MHC-TLR7-TLR8 cluster	LI.M146	0		MHC-TLR7-TLR8 cluster
LI.M10.1	3	MCM4,CDC6,DCLRE1A	E2F1 targets (Q4)	LI.M10.1	8	PCNA,PKMYT1,MELK,MCM4,FBXO5,CIT,WEE1,DCLRE1A	E2F1 targets (Q4)	LI.M10.1	6	MELK,MCM4,CIT,WEE1,CDC6,DCLRE1A	E2F1 targets (Q4)	LI.M10.1	0		E2F1 targets (Q4)
LI.M169	1	NUP37	mitosis (TF motif CCAATNNSNNNGCG)	LI.M169	4	PCNA,NUP37,NIF3L1,PMS1	mitosis (TF motif CCAATNNSNNNGCG)	LI.M169	0		mitosis (TF motif CCAATNNSNNNGCG)	LI.M169	0		mitosis (TF motif CCAATNNSNNNGCG)
LI.M81	2	EHD3,CCR2	enriched in myeloid cells and monocytes	LI.M81	1	CCR2	enriched in myeloid cells and monocytes	LI.M81	10	EHD3,CCR2,CHI3L1,NLRP3,THBS1,MARCKS,HHEX,CD14,TLR7,TLR4	enriched in myeloid cells and monocytes	LI.M81	3	EHD3,TLR7,SELP	enriched in myeloid cells and monocytes
LI.M111.0	3	IFI35,LY86,BST2	viral sensing & immunity; IRF2 targets network (I)	LI.M111.0	0		viral sensing & immunity; IRF2 targets network (I)	LI.M111.0	13	TAP1,TLR7,ZBP1,IFI35,LY86,THBS1,PSMB8,EREG,FES,BST2,USP18,CTSS,RIPK2	viral sensing & immunity; IRF2 targets network (I)	LI.M111.0	0		viral sensing & immunity; IRF2 targets network (I)
LI.M76	4	RFC4,RFC3,FEN1,BRCA1	DNA repair	LI.M76	7	PCNA,RFC5,RFC3,FANCG,FANCI,H2AFX,RAD50	DNA repair	LI.M76	0		DNA repair	LI.M76	0		DNA repair
LI.M213	0		regulation of transcription, transcription factors	LI.M213	0		regulation of transcription, transcription factors	LI.M213	0		regulation of transcription, transcription factors	LI.M213	0		regulation of transcription, transcription factors
LI.M174	2	TSN,EED	TBA	LI.M174	2	EED,SACM1L	TBA	LI.M174	3	TSN,EED,TMX1	TBA	LI.M174	0		TBA
LI.M74	3	MEF2C,JUP,HLA-DOA	transcriptional targets of glucocorticoid receptor	LI.M74	0		transcriptional targets of glucocorticoid receptor	LI.M74	5	CTGF,MEF2C,JUP,HLA-DOA,BTK	transcriptional targets of glucocorticoid receptor	LI.M74	0		transcriptional targets of glucocorticoid receptor
LI.M4.0	0		cell cycle and transcription	LI.M4.0	104	BUB1B,PLK1,NUF2,PLK4,KIF2C,SKA1,TPX2,UBE2T,DLGAP5,CDCA7,CENPN,CENPK,CENPF,CENPA,ZWINT,DEPDC1B,KIFC1,H2AFX,KIF23,CCNF,TOP2A,TCF19,SPC24,SPC25,CDC20,TROAP,TMEM106C,STIL,BUB1,CDC25C,NCAPH,NCAPG,KIF18B,KIF15,PBK,TIPIN,KIF20B,UBE2C,MELK,DEPDC1,KIF20A,SMC2,POLQ,MKI67,RFC5,RFC3,KIF14,FOXM1,FBXO5,ZWILCH,BRIP1,NDC80,CDC7,RACGAP1,ASPM,CDT1,CKS1B,MCM4,FANCI,CKS2,WDR76,HMMR,CCDC34,KIF11,PTTG1,UHRF1,SHCBP1,CD…	cell cycle and transcription	LI.M4.0	96	PLK4,FCGR1B,FCGR1A,S100A11,SEMA4A,MAFB,S100A12,CPPED1,TPX2,SPDL1,MARCKS,BRCA1,CENPI,ALOX5,TNFAIP2,RBM47,RAB31,TLR2,DAPK1,TLR4,PTAFR,TLR8,CSF2RA,RASSF4,FEN1,FGL2,RIN2,LY86,STIL,LILRB2,LILRB1,TIMELESS,TNS3,GCA,NCF1C,HCK,IL13RA1,GINS1,TIPIN,KIF20B,MELK,CD14,SIRPB2,MCM2,NCF1,SMC2,POLQ,MKI67,RFC3,ZWILCH,BRIP1,WDHD1,CDC6,SCPEP1,SPI1,MCM4,CD86,RAD51AP1,S100A9,SLC7A7,EPB41L3,MTMR11,CSTA,KIF11,FES,LMO2,AP…	cell cycle and transcription	LI.M4.0	18	MYBL2,CHAC2,RMI2,CD1D,STMN1,POLA2,TIMELESS,PAICS,MCM2,RFC3,FANCD2,ERCC6L,CKS1B,MCM4,LMNB1,POLA1,KIF18A,MCM5	cell cycle and transcription
LI.M37.0	0		immune activation - generic cluster	LI.M37.0	24	GRAP2,SLC27A2,HMGB2,CHAF1B,NUP37,CENPL,DBF4,VANGL1,DTYMK,UNG,BORA,SAC3D1,PSRC1,CD3E,CD3G,PROK2,SH2D1A,CD2,RAD51C,SLCO4C1,KCNK5,CKAP2,PKMYT1,TSPAN2	immune activation - generic cluster	LI.M37.0	75	BANK1,PRRG4,ERI2,ANPEP,CD19,CIITA,ACPP,CHAF1B,HLA-DRA,SULF2,CDK14,JAG1,TCL1A,C3AR1,LILRA5,MARCH1,CHI3L1,BARD1,ARHGEF10L,MEF2C,BTK,CD72,RFC2,PRKAR2B,NLRP3,ADAP2,GAB1,BASP1,BORA,RGL1,FCGR2C,PADI2,EBF1,TUBG1,MMP9,BRCA2,CREB5,TMEM176A,TMEM176B,CTSS,CXCL1,SMPDL3A,RUNX2,CSF2RB,ICOSLG,JUP,PAX5,PROK2,CD9,KIF16B,RAD51C,STX11,HLA-DOA,FCGR3A,NLRC4,ALDH1A1,ITGAM,GSN,LYN,ENTPD1,RNASE6,TLR1,TLR7,ATP8B4,LRRK2,T…	immune activation - generic cluster	LI.M37.0	37	BANK1,LAT,MAL,VPREB3,BLM,CD19,CIITA,TCL1A,CHI3L2,CEACAM1,JAM3,IGFBP7,MEF2C,DTYMK,CD72,FAM226B,RANBP1,FAM43A,LCN2,MSH2,DHCR24,MARCH3,PAX5,CCR9,HLA-DOA,FOXO1,ANXA3,MCM7,MCM3,ENTPD1,CD22,TLR7,SLC19A2,SLC26A8,GNAI1,DACH1,ZNF608	immune activation - generic cluster
LI.M11.0	0		enriched in monocytes (II)	LI.M11.0	0		enriched in monocytes (II)	LI.M11.0	68	MARCH1,FCGR1B,FCGR1A,S100A11,MAFB,S100A12,CPPED1,LYN,TBXAS1,TMEM176A,SMPDL3A,RBM47,SYK,TLR2,TLR4,TLR8,CSF2RA,SLC7A7,RASSF4,RIN2,LY86,LILRB2,LILRB1,PILRA,TNS3,GCA,NCF1C,IL13RA1,TNFAIP2,CD14,ITGAM,BTK,NCF1,MYCL,PTAFR,HCK,SPI1,NLRP3,CD86,SCPEP1,ADAP2,S100A9,EPB41L3,MTMR11,CSTA,FES,LMO2,ALDH2,FGL2,CTSH,MPEG1,ALDH1A1,RAB31,MSRB1,SIGLEC7,SULF2,MNDA,ALOX5,ANPEP,CYBB,PADI2,CPVL,DMXL2,CHST15,TYMP,LILRA5,L…	enriched in monocytes (II)	LI.M11.0	1	CD1D	enriched in monocytes (II)
LI.M7.2	0		enriched in NK cells (I)	LI.M7.2	25	TGFBR3,KLRD1,CCL5,TBX21,NLRC3,ARL4C,PLEKHF1,RORA,EOMES,FGFBP2,SAMD3,CST7,PRKCH,S1PR5,SH2D2A,FASLG,PRF1,PRKCQ,GZMA,HOPX,GZMB,NKG7,CD96,GZMM,GZMH	enriched in NK cells (I)	LI.M7.2	0		enriched in NK cells (I)	LI.M7.2	3	XCL1,GIMAP7,CD96	enriched in NK cells (I)
LI.M7.0	0		enriched in T cells (I)	LI.M7.0	24	CCL5,SH2D1A,TRBC1,CD2,NKG7,TRAC,RORA,EOMES,SAMD3,NLRC3,PRKCH,PRF1,PRKCQ,GATA3,GZMA,GZMB,CD96,GZMM,GZMH,TIGIT,IL32,CD3D,CD3E,CD3G	enriched in T cells (I)	LI.M7.0	1	CCL5	enriched in T cells (I)	LI.M7.0	9	MAL,XCL1,ICOS,NELL2,LAT,GIMAP7,CD96,ITM2A,IL32	enriched in T cells (I)
LI.M7.1	0		T cell activation (I)	LI.M7.1	20	CCL5,TIGIT,CD2,PTPN22,TRBC1,IL12RB1,RORA,EOMES,PRKCQ,NLRC3,PRKCH,CD8A,ITPR3,CD8B,GATA3,TRAC,CORO1A,CD3D,CD3E,CD3G	T cell activation (I)	LI.M7.1	3	CCL5,MS4A1,SLAMF7	T cell activation (I)	LI.M7.1	5	CCR7,MS4A1,DPP4,ICOS,IL21R	T cell activation (I)
LI.M6	0		mitotic cell division	LI.M6	22	MAD2L1,BUB1B,PLK1,ZWINT,BIRC5,CENPK,CDC20,NDC80,KIF2C,SKA1,AURKB,CDCA8,CENPO,CENPN,BUB1,CENPF,CENPE,CENPA,ZWILCH,NUF2,SPC25,SPC24	mitotic cell division	LI.M6	0		mitotic cell division	LI.M6	2	ERCC6L,KIF18A	mitotic cell division
LI.M4.5	0		mitotic cell cycle in stimulated CD4 T cells	LI.M4.5	20	MAD2L1,CEP55,LAG3,NDC80,FBXO5,MELK,GRAP2,CDCA7,CDCA5,CENPK,NUF2,ZNF367,KIF11,DEPDC1B,UHRF1,CDC20,CDK1,TOP2A,UBE2T,KIF20A	mitotic cell cycle in stimulated CD4 T cells	LI.M4.5	0		mitotic cell cycle in stimulated CD4 T cells	LI.M4.5	0		mitotic cell cycle in stimulated CD4 T cells
LI.S4	0		Monocyte surface signature	LI.S4	1	CCR2	Monocyte surface signature	LI.S4	0		Monocyte surface signature	LI.S4	3	APCDD1,TMEM154,SPNS1	Monocyte surface signature
LI.M37.1	0		enriched in neutrophils (I)	LI.M37.1	2	CXCR1,PROK2	enriched in neutrophils (I)	LI.M37.1	0		enriched in neutrophils (I)	LI.M37.1	1	MME	enriched in neutrophils (I)
LI.M4.2	0		PLK1 signaling events	LI.M4.2	24	BUB1B,PLK1,CEP55,KIF14,FBXO5,NDC80,TPX2,HJURP,ECT2,ASPM,AURKA,WEE1,CLSPN,ASF1B,BUB1,CDC25C,CENPE,TRIP13,KIF23,CDC20,NCAPG,CKAP2L,SPC25,KIF20A	PLK1 signaling events	LI.M4.2	0		PLK1 signaling events	LI.M4.2	2	MYBL2,ERCC6L	PLK1 signaling events
LI.S1	0		NK cell surface signature	LI.S1	12	ADRB2,S1PR5,KIR2DS4,SLCO4C1,TGFBR3,KLRC3,ENPP5,FASLG,CX3CR1,RARRES3,KIR2DL3,KIR2DL1	NK cell surface signature	LI.S1	0		NK cell surface signature	LI.S1	4	IL12RB2,SLC7A5,IL18R1,SYNGR3	NK cell surface signature
LI.M91	0		adhesion and migration, chemotaxis	LI.M91	5	CX3CR1,CCL5,PROK2,F2R,ADRB2	adhesion and migration, chemotaxis	LI.M91	4	CCL5,PROK2,CCR5,CXCL13	adhesion and migration, chemotaxis	LI.M91	3	CCL19,CCR7,CXCL13	adhesion and migration, chemotaxis
LI.M16	0		TLR and inflammatory signaling	LI.M16	0		TLR and inflammatory signaling	LI.M16	18	FCGR1A,NCF4,TLR6,FCGR1B,LILRB1,PILRA,MYD88,ALOX5,FCGR2C,FES,TLR7,LILRB2,KCNJ2,TLR2,TLR1,ANPEP,TLR4,TLR8	TLR and inflammatory signaling	LI.M16	1	TLR7	TLR and inflammatory signaling
LI.M3	0		regulation of signal transduction	LI.M3	2	GATA3,CD3E	regulation of signal transduction	LI.M3	12	ECM1,GAB1,S100A12,SULF2,CDK14,JUP,ADAP2,LYN,SYK,TLR2,RGL1,CTGF	regulation of signal transduction	LI.M3	2	FOXO1,APCDD1	regulation of signal transduction
LI.M5.0	0		regulation of antigen presentation and immune response	LI.M5.0	9	HLA-DPB1,PRKCQ,TRBC1,GRAP2,PTPN22,TRAC,CD3D,CD3E,CD3G	regulation of antigen presentation and immune response	LI.M5.0	33	HLA-DPB1,PTPN6,HLA-DRA,FCGR1B,TLR6,TLR10,TLR2,LILRB2,LILRB1,CD86,MNDA,DUSP6,CTSH,TLR4,HLA-DRB1,CD24,TLR7,HCK,LYN,MYD88,INPP5D,HLA-DMB,RPS6KA1,HLA-DQA1,MEF2C,SYK,TLR1,HLA-DOA,HLA-DOB,HLA-DMA,HLA-DPA1,CD19,BTK	regulation of antigen presentation and immune response	LI.M5.0	10	CCR7,TLR10,CD24,TLR7,HLA-DMB,MEF2C,HLA-DOA,HLA-DOB,HLA-DPA1,CD19	regulation of antigen presentation and immune response
LI.M7.3	0		T cell activation (II)	LI.M7.3	10	CCL5,TIGIT,NLRC3,IL12RB1,CXCR3,NKG7,GZMA,CD3E,CD3D,CD3G	T cell activation (II)	LI.M7.3	5	CCL5,SP140,CCR5,CXCR3,SLAMF7	T cell activation (II)	LI.M7.3	3	SP140,ICOS,IL18R1	T cell activation (II)
LI.M157	0		enriched in NK cells (III)	LI.M157	6	KLRC3,CX3CR1,TIGIT,C1orf21,TRGC2,PTPN4	enriched in NK cells (III)	LI.M157	0		enriched in NK cells (III)	LI.M157	0		enriched in NK cells (III)
LI.M86.0	0		chemokines and inflammatory molecules in myeloid cells	LI.M86.0	0		chemokines and inflammatory molecules in myeloid cells	LI.M86.0	0		chemokines and inflammatory molecules in myeloid cells	LI.M86.0	0		chemokines and inflammatory molecules in myeloid cells
LI.M103	0		cell cycle (III)	LI.M103	19	BUB1B,PLK1,PKMYT1,MAD2L1,CDC7,CCNA2,TTK,DBF4,WEE1,PCNA,CDKN2A,BUB1,RBL1,CDC25C,MCM4,PTTG1,E2F2,CDC20,CDK1	cell cycle (III)	LI.M103	0		cell cycle (III)	LI.M103	0		cell cycle (III)
LI.M64	0		enriched in activated dendritic cells/monocytes	LI.M64	0		enriched in activated dendritic cells/monocytes	LI.M64	9	CXCL1,DRAM1,SOD2,IL13RA1,TNFAIP2,BASP1,MARCKS,FAM129A,ANPEP	enriched in activated dendritic cells/monocytes	LI.M64	0		enriched in activated dendritic cells/monocytes
LI.M61.0	0		enriched in NK cells (II)	LI.M61.0	7	NKG7,KIR2DS4,S1PR5,TGFBR3,KIR2DL3,CD96,KIR2DL1	enriched in NK cells (II)	LI.M61.0	0		enriched in NK cells (II)	LI.M61.0	1	CD96	enriched in NK cells (II)
LI.M27.0	0		chemokine cluster (I)	LI.M27.0	1	CCL5	chemokine cluster (I)	LI.M27.0	11	CCL2,CCL7,CCL5,CCL8,CXCL13,CXCL1,CXCL3,CCL13,CXCL5,CXCL6,CCL18	chemokine cluster (I)	LI.M27.0	0		chemokine cluster (I)
LI.M43.1	0		myeloid, dendritic cell activation via NFkB (II)	LI.M43.1	1	CCL5	myeloid, dendritic cell activation via NFkB (II)	LI.M43.1	0		myeloid, dendritic cell activation via NFkB (II)	LI.M43.1	0		myeloid, dendritic cell activation via NFkB (II)
LI.M130	0		enriched in G-protein coupled receptors	LI.M130	5	CCL5,F2R,ADRB2,S1PR5,ITPR3	enriched in G-protein coupled receptors	LI.M130	0		enriched in G-protein coupled receptors	LI.M130	1	XCL1	enriched in G-protein coupled receptors
LI.M4.7	0		mitotic cell cycle	LI.M4.7	12	CCNA2,SHCBP1,PLK1,CDC25C,CDT1,CEP152,PKMYT1,E2F8,CDK1,FOXM1,PLK4,CKAP5	mitotic cell cycle	LI.M4.7	0		mitotic cell cycle	LI.M4.7	0		mitotic cell cycle
LI.M5.1	0		T cell activation and signaling	LI.M5.1	8	CD52,CD2,IL12RB1,TRAC,CD3E,PRKACB,CD3D,CD3G	T cell activation and signaling	LI.M5.1	2	HLA-DRA,HLA-DRB1	T cell activation and signaling	LI.M5.1	0		T cell activation and signaling
LI.M105	0		TBA	LI.M105	1	PROK2	TBA	LI.M105	0		TBA	LI.M105	2	CLEC11A,IGFBP7	TBA
LI.M118.0	0		enriched in monocytes (IV)	LI.M118.0	1	SMARCD3	enriched in monocytes (IV)	LI.M118.0	14	ARHGEF10L,LTBR,PGD,LRRK2,DOK3,DUSP6,HHEX,RNASE6,TMEM176B,CTSS,EMILIN2,ACPP,TLR1,HLA-DMB	enriched in monocytes (IV)	LI.M118.0	1	HLA-DMB	enriched in monocytes (IV)
LI.M43.0	0		myeloid, dendritic cell activation via NFkB (I)	LI.M43.0	2	CCL5,VCAM1	myeloid, dendritic cell activation via NFkB (I)	LI.M43.0	0		myeloid, dendritic cell activation via NFkB (I)	LI.M43.0	0		myeloid, dendritic cell activation via NFkB (I)
LI.M11.1	0		blood coagulation	LI.M11.1	0		blood coagulation	LI.M11.1	0		blood coagulation	LI.M11.1	0		blood coagulation
LI.M4.3	0		myeloid cell enriched receptors and transporters	LI.M4.3	0		myeloid cell enriched receptors and transporters	LI.M4.3	14	SLC7A7,LRRC25,SULF2,CD86,SLC1A3,MPEG1,MTMR11,RNASE6,CHST15,SLC2A6,CD14,TLR8,SIGLEC7,LILRA1	myeloid cell enriched receptors and transporters	LI.M4.3	1	CD1D	myeloid cell enriched receptors and transporters
LI.M46	0		cell division stimulated CD4+ T cells	LI.M46	11	ZWINT,CDT1,KIF4A,CDCA3,CDCA7,TOP2A,UHRF1,SLC27A2,SHCBP1,CDK1,KIF20A	cell division stimulated CD4+ T cells	LI.M46	0		cell division stimulated CD4+ T cells	LI.M46	0		cell division stimulated CD4+ T cells
LI.M49	0		transcription regulation in cell development	LI.M49	9	HMGB2,FBXO5,ECT2,ASPM,KIF4A,FHL2,TRIP13,CDC20,CDK1	transcription regulation in cell development	LI.M49	13	SPTA1,SEMA4A,GSN,ECT2,CDH1,LYN,BRCA1,ARHGEF12,SOD2,FES,LILRB1,TMOD1,BASP1	transcription regulation in cell development	LI.M49	4	STMN1,MSH2,ANK1,CDH1	transcription regulation in cell development
LI.M73	0		enriched in monocytes (III)	LI.M73	0		enriched in monocytes (III)	LI.M73	0		enriched in monocytes (III)	LI.M73	1	MAML3	enriched in monocytes (III)
LI.S6	0		CD4 T cell surface signature Th1-stimulated	LI.S6	4	F2R,GPR19,LAG3,TSPAN5	CD4 T cell surface signature Th1-stimulated	LI.S6	0		CD4 T cell surface signature Th1-stimulated	LI.S6	0		CD4 T cell surface signature Th1-stimulated
LI.M36	0		T cell surface, activation	LI.M36	4	VCAM1,CD8A,CD3D,CD3E	T cell surface, activation	LI.M36	0		T cell surface, activation	LI.M36	0		T cell surface, activation
LI.M31	0		cell cycle and growth arrest	LI.M31	0		cell cycle and growth arrest	LI.M31	0		cell cycle and growth arrest	LI.M31	0		cell cycle and growth arrest
LI.M20	0		AP-1 transcription factor network	LI.M20	0		AP-1 transcription factor network	LI.M20	0		AP-1 transcription factor network	LI.M20	0		AP-1 transcription factor network
LI.M78	0		myeloid cell cytokines, metallopeptidases and laminins	LI.M78	0		myeloid cell cytokines, metallopeptidases and laminins	LI.M78	0		myeloid cell cytokines, metallopeptidases and laminins	LI.M78	0		myeloid cell cytokines, metallopeptidases and laminins
LI.M30	0		cell movement, Adhesion & Platelet activation	LI.M30	0		cell movement, Adhesion & Platelet activation	LI.M30	0		cell movement, Adhesion & Platelet activation	LI.M30	0		cell movement, Adhesion & Platelet activation
LI.M223	0		enriched in T cells (II)	LI.M223	4	HOPX,PLEKHF1,FGFBP2,TRGC2	enriched in T cells (II)	LI.M223	0		enriched in T cells (II)	LI.M223	2	LRRN3,DPP4	enriched in T cells (II)
LI.M35.0	0		signaling in T cells (I)	LI.M35.0	3	GZMB,FASLG,PRF1	signaling in T cells (I)	LI.M35.0	0		signaling in T cells (I)	LI.M35.0	0		signaling in T cells (I)
LI.M29	0		proinflammatory cytokines and chemokines	LI.M29	0		proinflammatory cytokines and chemokines	LI.M29	0		proinflammatory cytokines and chemokines	LI.M29	0		proinflammatory cytokines and chemokines
LI.M89.0	0		putative targets of PAX3	LI.M89.0	0		putative targets of PAX3	LI.M89.0	0		putative targets of PAX3	LI.M89.0	0		putative targets of PAX3
LI.M4.12	0		C-MYC transcriptional network	LI.M4.12	6	CKS2,BIRC5,CENPA,KIF11,TOP2A,CDCA7	C-MYC transcriptional network	LI.M4.12	0		C-MYC transcriptional network	LI.M4.12	1	NME1	C-MYC transcriptional network
LI.M4.14	0		Rho GTPase cycle	LI.M4.14	7	E2F2,ECT2,RACGAP1,CEP55,DEPDC1,ARHGAP11A,DEPDC1B	Rho GTPase cycle	LI.M4.14	0		Rho GTPase cycle	LI.M4.14	0		Rho GTPase cycle
LI.M15	0		Ran mediated mitosis	LI.M15	9	TPX2,BUB1B,PLK1,H2AFX,KIF15,AURKA,AURKB,KIF2C,KPNA2	Ran mediated mitosis	LI.M15	0		Ran mediated mitosis	LI.M15	2	RAN,RANBP1	Ran mediated mitosis
LI.M172	0		enriched for TF motif TTCNRGNNNNTTC	LI.M172	0		enriched for TF motif TTCNRGNNNNTTC	LI.M172	0		enriched for TF motif TTCNRGNNNNTTC	LI.M172	0		enriched for TF motif TTCNRGNNNNTTC
LI.S11	0		Activated (LPS) dendritic cell surface signature	LI.S11	1	IFI27	Activated (LPS) dendritic cell surface signature	LI.S11	20	CSF2RB,IFI27,LY75,CD80,TMCC3,F11R,RNF144B,CALCRL,CD40,IL3RA,TMEM140,PDCD1LG2,KITLG,PRRG4,IL13RA1,GPR157,IFI6,ELOVL7,EREG,SIGLEC1	Activated (LPS) dendritic cell surface signature	LI.S11	4	LY75,CALCRL,TMEM140,GPR157	Activated (LPS) dendritic cell surface signature
LI.M4.9	0		mitotic cell cycle in stimulated CD4 T cells	LI.M4.9	7	CENPF,CENPE,PLK4,ZNF367,KIF14,NCAPH,TRIP13	mitotic cell cycle in stimulated CD4 T cells	LI.M4.9	0		mitotic cell cycle in stimulated CD4 T cells	LI.M4.9	0		mitotic cell cycle in stimulated CD4 T cells
LI.M132	0		recruitment of neutrophils	LI.M132	2	PROK2,CXCR1	recruitment of neutrophils	LI.M132	0		recruitment of neutrophils	LI.M132	0		recruitment of neutrophils
LI.M13	0		innate activation by cytosolic DNA sensing	LI.M13	3	CCL5,ZBP1,AIM2	innate activation by cytosolic DNA sensing	LI.M13	6	DDX58,IRF7,CCL5,ZBP1,AIM2,PYCARD	innate activation by cytosolic DNA sensing	LI.M13	0		innate activation by cytosolic DNA sensing
LI.M114.0	0		TBA	LI.M114.0	2	KCNK5,TSPAN2	TBA	LI.M114.0	0		TBA	LI.M114.0	2	CLEC11A,IGFBP7	TBA
LI.M4.6	0		cell division in stimulated CD4 T cells	LI.M4.6	11	CDKN3,ANLN,CEP55,HMMR,CDCA2,CDCA7,UBE2T,DEPDC1B,FAM72B,FAM72C,FANCI	cell division in stimulated CD4 T cells	LI.M4.6	0		cell division in stimulated CD4 T cells	LI.M4.6	0		cell division in stimulated CD4 T cells
LI.M27.1	0		chemokine cluster (II)	LI.M27.1	1	CCL5	chemokine cluster (II)	LI.M27.1	7	CCL2,CXCL5,CCL7,CCL5,CXCL6,CCR5,CXCL13	chemokine cluster (II)	LI.M27.1	2	XCL1,CXCL13	chemokine cluster (II)
LI.S5	0		DC surface signature	LI.S5	0		DC surface signature	LI.S5	25	CSF2RB,TM2D2,KMO,LRFN4,SIGLEC1,PDCD1LG2,PSEN2,SPINT2,TSPAN33,CD83,CD9,LHFPL2,JAG1,SLC38A6,ITPRIPL2,CALCRL,TMEM255A,P2RY6,PRRG4,CRIM1,GPR157,ABCA6,MSR1,SLC1A3,HLA-DQA1	DC surface signature	LI.S5	3	TSPAN33,CALCRL,GPR157	DC surface signature
LI.M37.3	0		cell division	LI.M37.3	5	SAC3D1,RUVBL1,NUP37,CKAP2,VRK1	cell division	LI.M37.3	0		cell division	LI.M37.3	0		cell division
LI.M177.0	0		TBA	LI.M177.0	5	CCR2,RNF170,GIMAP4,ZNF623,CX3CR1	TBA	LI.M177.0	0		TBA	LI.M177.0	0		TBA
LI.M4.8	0		cell division - E2F transcription network	LI.M4.8	8	PCNA,MAD2L1,RFC5,H2AFX,KIF4A,MCM4,DTYMK,ZWINT	cell division - E2F transcription network	LI.M4.8	0		cell division - E2F transcription network	LI.M4.8	7	NASP,TIMELESS,MCM4,DTYMK,MCM2,MCM3,RANBP1	cell division - E2F transcription network
LI.M4.11	0		mitotic cell cycle in stimulated CD4 T cells	LI.M4.11	6	CCNA2,MELK,SUV39H1,CDCA3,AURKB,RAD51C	mitotic cell cycle in stimulated CD4 T cells	LI.M4.11	4	SPDL1,MELK,SUV39H1,RAD51C	mitotic cell cycle in stimulated CD4 T cells	LI.M4.11	0		mitotic cell cycle in stimulated CD4 T cells
LI.M94	0		growth factor induced, enriched in nuclear receptor subfamily 4	LI.M94	0		growth factor induced, enriched in nuclear receptor subfamily 4	LI.M94	0		growth factor induced, enriched in nuclear receptor subfamily 4	LI.M94	0		growth factor induced, enriched in nuclear receptor subfamily 4
LI.M52	0		T cell activation (IV)	LI.M52	4	GFI1,GATA3,LAG3,CD3E	T cell activation (IV)	LI.M52	5	SPI1,LPXN,LAG3,PTPN6,UNC93B1	T cell activation (IV)	LI.M52	0		T cell activation (IV)
LI.M45	0		leukocyte activation and migration	LI.M45	3	SELPLG,ITGAL,CD2	leukocyte activation and migration	LI.M45	0		leukocyte activation and migration	LI.M45	0		leukocyte activation and migration
LI.M117	0		cell adhesion (GO)	LI.M117	5	CD96,CXCR3,CORO1A,PRKCQ,SELPLG	cell adhesion (GO)	LI.M117	2	CXCR3,PLEK	cell adhesion (GO)	LI.M117	2	NELL2,CD96	cell adhesion (GO)
LI.M216	0		respiratory electron transport chain (mitochondrion)	LI.M216	5	NDUFB7,UQCRB,NDUFB10,NDUFS6,COX6C	respiratory electron transport chain (mitochondrion)	LI.M216	0		respiratory electron transport chain (mitochondrion)	LI.M216	0		respiratory electron transport chain (mitochondrion)
LI.M61.1	0		enriched in NK cells (KIR cluster)	LI.M61.1	3	KIR2DS4,KIR2DL3,KIR2DL1	enriched in NK cells (KIR cluster)	LI.M61.1	0		enriched in NK cells (KIR cluster)	LI.M61.1	0		enriched in NK cells (KIR cluster)
LI.M61.2	0		enriched in NK cells (receptor activation)	LI.M61.2	5	KIR2DL3,CD96,KIR2DL1,PRKCQ,KLRD1	enriched in NK cells (receptor activation)	LI.M61.2	0		enriched in NK cells (receptor activation)	LI.M61.2	0		enriched in NK cells (receptor activation)
LI.M62.0	0		T & B cell development, activation	LI.M62.0	3	CD3G,SH2D1A,CD3E	T & B cell development, activation	LI.M62.0	0		T & B cell development, activation	LI.M62.0	0		T & B cell development, activation
LI.M55	0		TBA	LI.M55	0		TBA	LI.M55	0		TBA	LI.M55	0		TBA
LI.M4.13	0		cell junction (GO)	LI.M4.13	0		cell junction (GO)	LI.M4.13	0		cell junction (GO)	LI.M4.13	0		cell junction (GO)
LI.M21	0		cell adhesion (lymphocyte homing)	LI.M21	1	IL32	cell adhesion (lymphocyte homing)	LI.M21	0		cell adhesion (lymphocyte homing)	LI.M21	6	SELL,CD72,CD24,IL32,CCR7,CXCL13	cell adhesion (lymphocyte homing)
LI.M10.0	0		E2F1 targets (Q3)	LI.M10.0	10	MAP4K1,FBXO5,WEE1,PCNA,ZNF367,MCM4,UNG,OSBPL7,ATAD2,MELK	E2F1 targets (Q3)	LI.M10.0	0		E2F1 targets (Q3)	LI.M10.0	0		E2F1 targets (Q3)
LI.M190	0		TBA	LI.M190	1	PPP1CC	TBA	LI.M190	0		TBA	LI.M190	0		TBA
LI.M93	0		TBA	LI.M93	2	TGFBR3,PTCH1	TBA	LI.M93	0		TBA	LI.M93	0		TBA
LI.S0	0		T cell surface signature	LI.S0	6	LAG3,CD2,CD320,TMEM106C,CD3E,CD3G	T cell surface signature	LI.S0	1	LAG3	T cell surface signature	LI.S0	0		T cell surface signature
LI.M87	0		transmembrane transport (I)	LI.M87	1	SLC14A1	transmembrane transport (I)	LI.M87	0		transmembrane transport (I)	LI.M87	1	CDH1	transmembrane transport (I)
LI.M118.1	0		enriched in monocytes (surface)	LI.M118.1	0		enriched in monocytes (surface)	LI.M118.1	0		enriched in monocytes (surface)	LI.M118.1	1	HLA-DMB	enriched in monocytes (surface)
LI.M60	0		lymphocyte generic cluster	LI.M60	3	SH2D2A,PRKCZ,CD2	lymphocyte generic cluster	LI.M60	5	MEF2C,GAB1,CTGF,BANK1,CD19	lymphocyte generic cluster	LI.M60	6	MEF2C,PRKCZ,CHI3L2,BANK1,DHCR24,CD19	lymphocyte generic cluster
LI.M56	0		suppression of MAPK signaling	LI.M56	0		suppression of MAPK signaling	LI.M56	0		suppression of MAPK signaling	LI.M56	0		suppression of MAPK signaling
LI.M38	0		chemokines and receptors	LI.M38	1	CCL5	chemokines and receptors	LI.M38	0		chemokines and receptors	LI.M38	0		chemokines and receptors
LI.M84	0		integrins and cell adhesion	LI.M84	5	ITGB7,CD96,ICAM3,VCAM1,ITGAL	integrins and cell adhesion	LI.M84	0		integrins and cell adhesion	LI.M84	0		integrins and cell adhesion
LI.M53	0		inflammasome receptors and signaling	LI.M53	0		inflammasome receptors and signaling	LI.M53	0		inflammasome receptors and signaling	LI.M53	1	BIRC3	inflammasome receptors and signaling
LI.M89.1	0		putative targets of PAX3	LI.M89.1	0		putative targets of PAX3	LI.M89.1	0		putative targets of PAX3	LI.M89.1	0		putative targets of PAX3
LI.M1.0	0		integrin cell surface interactions (I)	LI.M1.0	1	COL6A1	integrin cell surface interactions (I)	LI.M1.0	0		integrin cell surface interactions (I)	LI.M1.0	0		integrin cell surface interactions (I)
LI.M165	0		enriched in activated dendritic cells (II)	LI.M165	1	IFI27	enriched in activated dendritic cells (II)	LI.M165	21	CSF2RB,IFIH1,CSF2RA,TNFAIP6,HESX1,CCL8,MX2,IFIT3,IFIT2,IFIT1,SERPING1,RSAD2,RBM47,IFI27,DAPK1,PRRG4,PARP9,DSE,PRKAR2B,HERC5,SIGLEC1	enriched in activated dendritic cells (II)	LI.M165	1	LAMP3	enriched in activated dendritic cells (II)
LI.M8	0		E2F transcription factor network	LI.M8	7	CCNA2,E2F2,MELK,ZWINT,PARPBP,CDCA5,UBE2C	E2F transcription factor network	LI.M8	0		E2F transcription factor network	LI.M8	0		E2F transcription factor network
LI.M19	0		T cell differentiation (Th2)	LI.M19	4	GRAP2,IL32,GATA3,CD3G	T cell differentiation (Th2)	LI.M19	0		T cell differentiation (Th2)	LI.M19	6	PKIA,LAT,ITM2A,IL32,DPP4,MAL	T cell differentiation (Th2)
LI.M109	0		receptors, cell migration	LI.M109	4	TGFBR3,CCR2,CORO1A,GATA3	receptors, cell migration	LI.M109	3	LRRK2,C3AR1,CCR2	receptors, cell migration	LI.M109	2	SYNE2,CCR7	receptors, cell migration
LI.M23	0		RA, WNT, CSF receptors network (monocyte)	LI.M23	0		RA, WNT, CSF receptors network (monocyte)	LI.M23	0		RA, WNT, CSF receptors network (monocyte)	LI.M23	0		RA, WNT, CSF receptors network (monocyte)
LI.M18	0		T cell differentiation via ITK and PKC	LI.M18	4	PRKCH,SH2D1A,FASLG,PRKCQ	T cell differentiation via ITK and PKC	LI.M18	0		T cell differentiation via ITK and PKC	LI.M18	0		T cell differentiation via ITK and PKC
LI.M168	0		enriched in dendritic cells	LI.M168	0		enriched in dendritic cells	LI.M168	0		enriched in dendritic cells	LI.M168	0		enriched in dendritic cells
LI.M42	0		platelet activation (III)	LI.M42	0		platelet activation (III)	LI.M42	0		platelet activation (III)	LI.M42	0		platelet activation (III)
LI.M160	0		leukocyte differentiation	LI.M160	1	KLF13	leukocyte differentiation	LI.M160	0		leukocyte differentiation	LI.M160	0		leukocyte differentiation
LI.M7.4	0		T cell activation (III)	LI.M7.4	5	CD96,RORA,ATP8B2,ZMYND11,PRKCQ	T cell activation (III)	LI.M7.4	1	GLYR1	T cell activation (III)	LI.M7.4	3	NELL2,CD96,SEPT6	T cell activation (III)
LI.M0	0		targets of FOSL1/2	LI.M0	0		targets of FOSL1/2	LI.M0	0		targets of FOSL1/2	LI.M0	0		targets of FOSL1/2
LI.M72.2	0		TBA	LI.M72.2	2	LBR,SACM1L	TBA	LI.M72.2	0		TBA	LI.M72.2	0		TBA
LI.M198	0		TBA	LI.M198	0		TBA	LI.M198	0		TBA	LI.M198	0		TBA
LI.M79	0		TBA	LI.M79	0		TBA	LI.M79	0		TBA	LI.M79	0		TBA
LI.M115	0		cytokines - recepters cluster	LI.M115	0		cytokines - recepters cluster	LI.M115	0		cytokines - recepters cluster	LI.M115	0		cytokines - recepters cluster
LI.M208	0		TBA	LI.M208	0		TBA	LI.M208	0		TBA	LI.M208	0		TBA
LI.M24	0		cell activation (IL15, IL23, TNF)	LI.M24	0		cell activation (IL15, IL23, TNF)	LI.M24	0		cell activation (IL15, IL23, TNF)	LI.M24	0		cell activation (IL15, IL23, TNF)
LI.M85	0		platelet activation and degranulation	LI.M85	0		platelet activation and degranulation	LI.M85	0		platelet activation and degranulation	LI.M85	0		platelet activation and degranulation
LI.M163	0		enriched in neutrophils (II)	LI.M163	1	TSPAN2	enriched in neutrophils (II)	LI.M163	0		enriched in neutrophils (II)	LI.M163	0		enriched in neutrophils (II)
LI.M123	0		enriched in B cell differentiation	LI.M123	0		enriched in B cell differentiation	LI.M123	0		enriched in B cell differentiation	LI.M123	0		enriched in B cell differentiation
LI.M35.1	0		signaling in T cells (II)	LI.M35.1	3	GZMB,PRF1,FASLG	signaling in T cells (II)	LI.M35.1	0		signaling in T cells (II)	LI.M35.1	0		signaling in T cells (II)
LI.M119	0		enriched in activated dendritic cells (I)	LI.M119	0		enriched in activated dendritic cells (I)	LI.M119	5	RGL1,CD83,CD86,RIN2,IL4I1	enriched in activated dendritic cells (I)	LI.M119	0		enriched in activated dendritic cells (I)
LI.M131	0		TBA	LI.M131	1	FHL2	TBA	LI.M131	3	CMPK2,PRKAR2B,GMPR	TBA	LI.M131	0		TBA
LI.M86.1	0		proinflammatory dendritic cell, myeloid cell response	LI.M86.1	0		proinflammatory dendritic cell, myeloid cell response	LI.M86.1	0		proinflammatory dendritic cell, myeloid cell response	LI.M86.1	0		proinflammatory dendritic cell, myeloid cell response
LI.M95.1	0		enriched in antigen presentation (III)	LI.M95.1	1	EVI2B	enriched in antigen presentation (III)	LI.M95.1	7	HLA-DRA,ICAM1,PLEK,HLA-DRB1,LAPTM5,HLA-DMB,HLA-DMA	enriched in antigen presentation (III)	LI.M95.1	0		enriched in antigen presentation (III)
LI.M80	0		TBA	LI.M80	1	HCP5	TBA	LI.M80	8	MEF2C,RGL1,PLCB1,GAB1,CTGF,CRIM1,HCP5,BLNK	TBA	LI.M80	6	MEF2C,FAM43A,GNG11,MARCH3,CCR9,BLNK	TBA
LI.M151	0		TBA	LI.M151	2	PRKCH,RORA	TBA	LI.M151	0		TBA	LI.M151	0		TBA
LI.M177.1	0		TBA	LI.M177.1	3	ZNF623,CX3CR1,CCR2	TBA	LI.M177.1	0		TBA	LI.M177.1	2	TMOD2,ZNF485	TBA
LI.M51	0		cell adhesion	LI.M51	2	VCAM1,COL6A1	cell adhesion	LI.M51	0		cell adhesion	LI.M51	0		cell adhesion
LI.M2.0	0		extracellular matrix (I)	LI.M2.0	1	COL6A1	extracellular matrix (I)	LI.M2.0	0		extracellular matrix (I)	LI.M2.0	0		extracellular matrix (I)
LI.M11.2	0		formyl peptide receptor mediated neutrophil response	LI.M11.2	0		formyl peptide receptor mediated neutrophil response	LI.M11.2	0		formyl peptide receptor mediated neutrophil response	LI.M11.2	0		formyl peptide receptor mediated neutrophil response
LI.M95.0	0		enriched in antigen presentation (II)	LI.M95.0	3	HLA-DPB1,EVI2B,ITGAL	enriched in antigen presentation (II)	LI.M95.0	9	IL10RA,HLA-DRA,HLA-DRB1,HLA-DPB1,PLEK,IRF8,FGL2,ITGAM,HLA-DMA	enriched in antigen presentation (II)	LI.M95.0	0		enriched in antigen presentation (II)
LI.M159	0		G protein mediated calcium signaling	LI.M159	0		G protein mediated calcium signaling	LI.M159	0		G protein mediated calcium signaling	LI.M159	0		G protein mediated calcium signaling
LI.M155	0		G protein coupled receptors cluster	LI.M155	0		G protein coupled receptors cluster	LI.M155	0		G protein coupled receptors cluster	LI.M155	0		G protein coupled receptors cluster
LI.M238	0		respiratory electron transport chain (mitochondrion)	LI.M238	3	NDUFA3,NDUFB6,NDUFC2	respiratory electron transport chain (mitochondrion)	LI.M238	0		respiratory electron transport chain (mitochondrion)	LI.M238	0		respiratory electron transport chain (mitochondrion)
LI.M150	0		innate antiviral response	LI.M150	0		innate antiviral response	LI.M150	11	TAP1,IRF7,PLSCR1,EIF2AK2,APOBEC3A,OASL,OAS1,OAS3,RSAD2,IFIT1,SP100	innate antiviral response	LI.M150	0		innate antiviral response
LI.S2	0		B cell surface signature	LI.S2	0		B cell surface signature	LI.S2	31	SSPN,TSPAN13,SEMA4B,MS4A1,HLA-DPB1,GYPE,PLD4,FCRL3,IFNLR1,CD19,CD72,TLR10,CSMD1,CD79B,CD79A,SGCE,CELSR1,CD180,ADAM28,HLA-DOA,HLA-DOB,HLA-DPA1,CHL1,HLA-DRA,CXCR5,ABCB4,FCRL1,FCRL5,FCGR2B,CD24,HLA-DMA	B cell surface signature	LI.S2	33	TSPAN13,CD37,MS4A1,CD22,GYPE,PDZK1IP1,CCR9,CD200,GABBR1,JAM2,JAM3,CR2,CD19,CD72,TLR10,CCR6,CD79B,CD79A,CNR1,CELSR1,HLA-DOA,HLA-DOB,HLA-DPA1,CHL1,P2RX5,CXCR5,ABCB4,FCRL1,FCRL2,FCGR2B,CD24,PCDH9,PTPRK	B cell surface signature
LI.M75	0		antiviral IFN signature	LI.M75	0		antiviral IFN signature	LI.M75	12	IFIH1,SERPING1,RSAD2,IFIT1,DDX58,DHX58,OAS1,OAS3,PML,HERC5,DDX60,IRF7	antiviral IFN signature	LI.M75	0		antiviral IFN signature
LI.M245	0		translation initiation factor 3 complex	LI.M245	0		translation initiation factor 3 complex	LI.M245	0		translation initiation factor 3 complex	LI.M245	8	UXT,PHB2,EIF3D,EIF3E,EIF3F,RPL3,EEF1B2,FBL	translation initiation factor 3 complex
LI.M69	0		enriched in B cells (VI)	LI.M69	0		enriched in B cells (VI)	LI.M69	11	TSPAN13,HLA-DOB,CD72,MS4A1,CXCR5,ABCB4,FCRL1,CD79A,CD79B,ADAM28,CD19	enriched in B cells (VI)	LI.M69	17	CR2,PCDH9,TSPAN13,HLA-DOB,CD72,PTPRK,CD22,P2RX5,MS4A1,CXCR5,ABCB4,CD200,FCRL1,FCRL2,CD79A,CD79B,CD19	enriched in B cells (VI)
LI.M71	0		enriched in antigen presentation (I)	LI.M71	0		enriched in antigen presentation (I)	LI.M71	6	CD74,HLA-DPB1,HLA-DRA,HLA-DRB1,HLA-DPA1,HLA-DQA1	enriched in antigen presentation (I)	LI.M71	2	CD74,HLA-DPA1	enriched in antigen presentation (I)
LI.M54	0		BCR signaling	LI.M54	0		BCR signaling	LI.M54	8	INPP5D,SYK,PLCG2,PIK3R3,LYN,PTPN6,BTK,BLNK	BCR signaling	LI.M54	1	BLNK	BCR signaling
LI.M67	0		activated dendritic cells	LI.M67	0		activated dendritic cells	LI.M67	8	DDX58,IRF7,PLSCR1,IFIH1,SERPING1,DDX60,IGKC,RSAD2	activated dendritic cells	LI.M67	0		activated dendritic cells
LI.M58	0		B cell development/activation	LI.M58	0		B cell development/activation	LI.M58	6	TCF4,SPIB,LYN,DUSP6,BTK,BLNK	B cell development/activation	LI.M58	0		B cell development/activation
LI.M14	0		T cell differentiation	LI.M14	0		T cell differentiation	LI.M14	0		T cell differentiation	LI.M14	0		T cell differentiation
LI.M68	0		RIG-1 like receptor signaling	LI.M68	0		RIG-1 like receptor signaling	LI.M68	6	DDX58,IRF7,DHX58,TRIM25,IFIH1,ISG15	RIG-1 like receptor signaling	LI.M68	0		RIG-1 like receptor signaling
LI.M104	0		TBA	LI.M104	0		TBA	LI.M104	4	MGLL,MEF2C,JUP,CRIM1	TBA	LI.M104	0		TBA
LI.M83	0		enriched in naive and memory B cells	LI.M83	0		enriched in naive and memory B cells	LI.M83	6	PKIG,FCGR2B,MEF2C,BANK1,MS4A1,LY86	enriched in naive and memory B cells	LI.M83	7	PCDH9,PKIG,FCGR2B,CD37,MEF2C,BANK1,MS4A1	enriched in naive and memory B cells
LI.M47.4	0		enriched in B cells (V)	LI.M47.4	0		enriched in B cells (V)	LI.M47.4	6	FCRL3,FCGR2B,CELSR1,TLR10,CD180,FCRL5	enriched in B cells (V)	LI.M47.4	0		enriched in B cells (V)
LI.M178	0		enriched for promoter motif NATCACGTGAY (putative SREBF1 targets)	LI.M178	0		enriched for promoter motif NATCACGTGAY (putative SREBF1 targets)	LI.M178	4	ARHGEF12,PRKCE,PNOC,BLNK	enriched for promoter motif NATCACGTGAY (putative SREBF1 targets)	LI.M178	0		enriched for promoter motif NATCACGTGAY (putative SREBF1 targets)
LI.M66	0		TBA	LI.M66	0		TBA	LI.M66	9	IDO1,KMO,SLC7A7,ALDH2,CYBB,ADAP2,MAFB,BTK,CPVL	TBA	LI.M66	0		TBA
LI.M12	0		CD28 costimulation	LI.M12	0		CD28 costimulation	LI.M12	2	CHST15,CD24	CD28 costimulation	LI.M12	0		CD28 costimulation
LI.M126	0		double positive thymocytes	LI.M126	0		double positive thymocytes	LI.M126	1	TCF4	double positive thymocytes	LI.M126	0		double positive thymocytes
LI.S10	0		Resting dendritic cell surface signature	LI.S10	0		Resting dendritic cell surface signature	LI.S10	20	CD1C,LRFN4,CD86,PSEN2,KMO,LHFPL2,SLC1A3,JAG1,SPINT2,SLC38A6,ITPRIPL2,TTYH3,TMEM144,TMEM255A,P2RY6,SLC27A3,CRIM1,CD9,ABCA6,HLA-DMA	Resting dendritic cell surface signature	LI.S10	2	CD1C,MCUR1	Resting dendritic cell surface signature
LI.M37.2	0		endoplasmic reticulum	LI.M37.2	0		endoplasmic reticulum	LI.M37.2	6	WFS1,TBXAS1,UNC93B1,TLR7,MARCH1,TLR8	endoplasmic reticulum	LI.M37.2	0		endoplasmic reticulum
LI.M9	0		B cell development	LI.M9	0		B cell development	LI.M9	5	HHEX,CBFA2T3,SPI1,TLR4,LYN	B cell development	LI.M9	3	CBFA2T3,LTA,CCR7	B cell development
LI.M134	0		Membrane, ER proteins	LI.M134	0		Membrane, ER proteins	LI.M134	4	CD72,RGL1,CIITA,CORO2B	Membrane, ER proteins	LI.M134	0		Membrane, ER proteins
LI.M121	0		TBA	LI.M121	0		TBA	LI.M121	6	IGKV4-1,TAP1,IL15,PLSCR1,SLAMF7,IGKC	TBA	LI.M121	5	IGKV4-1,IRF4,CCL19,BIRC3,IGKC	TBA
LI.M39	0		integrin mediated leukocyte migration	LI.M39	0		integrin mediated leukocyte migration	LI.M39	1	PRKCB	integrin mediated leukocyte migration	LI.M39	0		integrin mediated leukocyte migration
LI.S9	0		Memory B cell surface signature	LI.S9	0		Memory B cell surface signature	LI.S9	7	SSPN,TNFRSF17,CSMD1,CHL1,FCGR2B,GRAMD1C,TNFRSF13B	Memory B cell surface signature	LI.S9	0		Memory B cell surface signature
LI.M65	0		IL2, IL7, TCR network	LI.M65	0		IL2, IL7, TCR network	LI.M65	0		IL2, IL7, TCR network	LI.M65	0		IL2, IL7, TCR network
LI.M28	0		antigen presentation (lipids and proteins)	LI.M28	0		antigen presentation (lipids and proteins)	LI.M28	3	CD1C,HLA-DRB1,HLA-DRA	antigen presentation (lipids and proteins)	LI.M28	0		antigen presentation (lipids and proteins)
LI.M102	0		TBA	LI.M102	0		TBA	LI.M102	4	SMAD1,STAP1,PNOC,CD79A	TBA	LI.M102	0		TBA
LI.M77	0		collagen, TGFB family et al	LI.M77	0		collagen, TGFB family et al	LI.M77	5	CD9,JUP,TCF4,CD24,MEF2C	collagen, TGFB family et al	LI.M77	0		collagen, TGFB family et al
LI.M97	0		enriched for SMAD2/3 signaling	LI.M97	0		enriched for SMAD2/3 signaling	LI.M97	5	TCL1A,RGL1,RUNX2,MEF2C,LAMC1	enriched for SMAD2/3 signaling	LI.M97	0		enriched for SMAD2/3 signaling
LI.M4.15	0		enriched in monocytes (I)	LI.M4.15	0		enriched in monocytes (I)	LI.M4.15	6	MYCL,EPB41L3,DPYSL2,FES,HCK,APLP2	enriched in monocytes (I)	LI.M4.15	0		enriched in monocytes (I)
LI.M137	0		TBA	LI.M137	0		TBA	LI.M137	4	PHTF2,AGL,PIKFYVE,PLEKHF2	TBA	LI.M137	0		TBA
LI.M240	0		chromosome Y linked	LI.M240	0		chromosome Y linked	LI.M240	0		chromosome Y linked	LI.M240	3	XIST,DPF3,MAP7D2	chromosome Y linked
LI.M40	0		complement and other receptors in DCs	LI.M40	0		complement and other receptors in DCs	LI.M40	0		complement and other receptors in DCs	LI.M40	0		complement and other receptors in DCs
LI.M180	0		TBA	LI.M180	0		TBA	LI.M180	0		TBA	LI.M180	0		TBA
LI.M33	0		inflammatory response	LI.M33	0		inflammatory response	LI.M33	0		inflammatory response	LI.M33	0		inflammatory response
LI.M48	0		TBA	LI.M48	0		TBA	LI.M48	0		TBA	LI.M48	0		TBA
LI.M212	0		purine nucleotide biosynthesis	LI.M212	0		purine nucleotide biosynthesis	LI.M212	0		purine nucleotide biosynthesis	LI.M212	9	ATIC,MTHFD1,RUVBL2,CCT3,CCT7,IMPDH2,PAICS,FKBP3,PFAS	purine nucleotide biosynthesis
LI.M204.0	0		chaperonin mediated protein folding (I)	LI.M204.0	0		chaperonin mediated protein folding (I)	LI.M204.0	0		chaperonin mediated protein folding (I)	LI.M204.0	8	ATIC,CCT2,CCT3,NOP56,CCT7,HSPD1,HSPE1,SSBP1	chaperonin mediated protein folding (I)
LI.M139	0		lysosomal/endosomal proteins	LI.M139	0		lysosomal/endosomal proteins	LI.M139	0		lysosomal/endosomal proteins	LI.M139	0		lysosomal/endosomal proteins
LI.M100	0		MAPK, RAS signaling	LI.M100	0		MAPK, RAS signaling	LI.M100	0		MAPK, RAS signaling	LI.M100	2	MAP4K1,RASGRP2	MAPK, RAS signaling
LI.M113	0		golgi membrane (I)	LI.M113	0		golgi membrane (I)	LI.M113	0		golgi membrane (I)	LI.M113	0		golgi membrane (I)
LI.M148	0		TBA	LI.M148	0		TBA	LI.M148	0		TBA	LI.M148	1	NUP160	TBA
LI.M214	0		TBA	LI.M214	0		TBA	LI.M214	0		TBA	LI.M214	0		TBA
LI.M32.0	0		platelet activation (I)	LI.M32.0	0		platelet activation (I)	LI.M32.0	0		platelet activation (I)	LI.M32.0	0		platelet activation (I)
LI.M209	0		lysosome	LI.M209	0		lysosome	LI.M209	0		lysosome	LI.M209	0		lysosome
LI.M32.1	0		platelet activation (II)	LI.M32.1	0		platelet activation (II)	LI.M32.1	0		platelet activation (II)	LI.M32.1	0		platelet activation (II)
LI.M112.0	0		complement activation (I)	LI.M112.0	0		complement activation (I)	LI.M112.0	0		complement activation (I)	LI.M112.0	0		complement activation (I)
LI.M32.3	0		KLF12 targets network	LI.M32.3	0		KLF12 targets network	LI.M32.3	0		KLF12 targets network	LI.M32.3	0		KLF12 targets network
LI.M242	0		TBA	LI.M242	0		TBA	LI.M242	0		TBA	LI.M242	0		TBA
LI.M32.8	0		cytoskeletal remodeling	LI.M32.8	0		cytoskeletal remodeling	LI.M32.8	0		cytoskeletal remodeling	LI.M32.8	0		cytoskeletal remodeling
LI.M181	0		nucleotide metabolism	LI.M181	0		nucleotide metabolism	LI.M181	0		nucleotide metabolism	LI.M181	5	CTPS1,ATIC,PAICS,CAD,PFAS	nucleotide metabolism
LI.M57	0		immuregulation - monocytes, T and B cells	LI.M57	0		immuregulation - monocytes, T and B cells	LI.M57	0		immuregulation - monocytes, T and B cells	LI.M57	5	CAMK2D,IGHD,BLK,CD200,CD79A	immuregulation - monocytes, T and B cells
LI.M140	0		extracellular matrix, complement	LI.M140	0		extracellular matrix, complement	LI.M140	0		extracellular matrix, complement	LI.M140	1	IGFBP7	extracellular matrix, complement
LI.M63	0		regulation of localization (GO)	LI.M63	0		regulation of localization (GO)	LI.M63	0		regulation of localization (GO)	LI.M63	0		regulation of localization (GO)
LI.M215	0		small GTPase mediated signal transduction	LI.M215	0		small GTPase mediated signal transduction	LI.M215	0		small GTPase mediated signal transduction	LI.M215	1	ARHGAP4	small GTPase mediated signal transduction
LI.M106.0	0		nuclear pore complex	LI.M106.0	0		nuclear pore complex	LI.M106.0	0		nuclear pore complex	LI.M106.0	8	NUP107,RAN,NUP160,NUP54,NUP43,NUP155,SEH1L,RANBP1	nuclear pore complex
LI.M59	0		CCR1, 7 and cell signaling	LI.M59	0		CCR1, 7 and cell signaling	LI.M59	0		CCR1, 7 and cell signaling	LI.M59	1	CCR7	CCR1, 7 and cell signaling
LI.M147	0		intracellular transport	LI.M147	0		intracellular transport	LI.M147	0		intracellular transport	LI.M147	1	NUP107	intracellular transport

## Sheet: Supplementary 9B
Supplementary Table 9B: Downregulated genes in enriched gene sets. CERNO algorithm and gene sets defined by Li et.al., Nat. Immunol., 2014 [18] are used in gene set enrichment
M.tb-infected vs M.tb-uninfected (All infants)				CMV-infected vs CMV-uninfected				M.tb-infected vs M.tb-uninfected (CMV-infected infants)				M.tb-infected vs M.tb-uninfected (CMV-uninfected infants)
ID	N	Genes	Name	ID	N	Genes	Name	ID	N	Genes	Name	ID	N	Genes	Name
LI.M156.1	0		plasma cells, immunoglobulins	LI.M156.1	0		plasma cells, immunoglobulins	LI.M156.1	0		plasma cells, immunoglobulins	LI.M156.1	0		plasma cells, immunoglobulins
LI.M156.0	0		plasma cells & B cells, immunoglobulins	LI.M156.0	1	STAP1	plasma cells & B cells, immunoglobulins	LI.M156.0	0		plasma cells & B cells, immunoglobulins	LI.M156.0	0		plasma cells & B cells, immunoglobulins
LI.M4.4	0		mitotic cell cycle - DNA replication	LI.M4.4	1	CDK2	mitotic cell cycle - DNA replication	LI.M4.4	1	MCM7	mitotic cell cycle - DNA replication	LI.M4.4	0		mitotic cell cycle - DNA replication
LI.M47.1	0		enriched in B cells (II)	LI.M47.1	0		enriched in B cells (II)	LI.M47.1	0		enriched in B cells (II)	LI.M47.1	1	CDK14	enriched in B cells (II)
LI.M47.2	0		enriched in B cells (III)	LI.M47.2	0		enriched in B cells (III)	LI.M47.2	0		enriched in B cells (III)	LI.M47.2	2	CDK14,HLA-DQA1	enriched in B cells (III)
LI.M47.3	0		enriched in B cells (IV)	LI.M47.3	0		enriched in B cells (IV)	LI.M47.3	0		enriched in B cells (IV)	LI.M47.3	1	CDK14	enriched in B cells (IV)
LI.M47.0	0		enriched in B cells (I)	LI.M47.0	0		enriched in B cells (I)	LI.M47.0	0		enriched in B cells (I)	LI.M47.0	0		enriched in B cells (I)
LI.M4.1	0		cell cycle (I)	LI.M4.1	1	PRKAR2B	cell cycle (I)	LI.M4.1	4	STMN1,SMC4,ERCC6L,TACC3	cell cycle (I)	LI.M4.1	45	BUB1B,PLK1,SKA1,TPX2,ESPL1,DLGAP5,BRCA1,CENPF,CENPE,CENPA,CENPW,KIFC1,KIF23,NCAPH,TOP2A,KIF11,NEK2,TTK,MELK,DSCC1,KIF15,FOXM1,RACGAP1,ASPM,FANCI,KIF20A,MKI67,BIRC5,CEP55,FAM83D,CCNA2,CDKN3,CDCA2,CDCA3,SKA3,AURKA,AURKB,CDCA5,CDCA8,ANLN,KIF18B,HJURP,E2F7,CCNB2,E2F8	cell cycle (I)
LI.M200	0		antigen processing and presentation	LI.M200	0		antigen processing and presentation	LI.M200	0		antigen processing and presentation	LI.M200	0		antigen processing and presentation
LI.M218	0		TBA	LI.M218	0		TBA	LI.M218	0		TBA	LI.M218	0		TBA
LI.M22.0	0		mismatch repair (I)	LI.M22.0	0		mismatch repair (I)	LI.M22.0	0		mismatch repair (I)	LI.M22.0	0		mismatch repair (I)
LI.M127	0		type I interferon response	LI.M127	0		type I interferon response	LI.M127	0		type I interferon response	LI.M127	0		type I interferon response
LI.M111.1	0		viral sensing & immunity; IRF2 targets network (II)	LI.M111.1	0		viral sensing & immunity; IRF2 targets network (II)	LI.M111.1	0		viral sensing & immunity; IRF2 targets network (II)	LI.M111.1	0		viral sensing & immunity; IRF2 targets network (II)
LI.M146	0		MHC-TLR7-TLR8 cluster	LI.M146	0		MHC-TLR7-TLR8 cluster	LI.M146	0		MHC-TLR7-TLR8 cluster	LI.M146	0		MHC-TLR7-TLR8 cluster
LI.M10.1	0		E2F1 targets (Q4)	LI.M10.1	0		E2F1 targets (Q4)	LI.M10.1	1	STMN1	E2F1 targets (Q4)	LI.M10.1	0		E2F1 targets (Q4)
LI.M169	0		mitosis (TF motif CCAATNNSNNNGCG)	LI.M169	0		mitosis (TF motif CCAATNNSNNNGCG)	LI.M169	0		mitosis (TF motif CCAATNNSNNNGCG)	LI.M169	0		mitosis (TF motif CCAATNNSNNNGCG)
LI.M81	3	MMRN1,SPARC,SNCA	enriched in myeloid cells and monocytes	LI.M81	13	LIN7A,PTGS1,FCER1G,NLRP3,THBS1,MARCKS,SLC8A1,PDGFA,ITGB3,ACTN1,CD14,SNCA,BCL6	enriched in myeloid cells and monocytes	LI.M81	1	MMRN1	enriched in myeloid cells and monocytes	LI.M81	13	LIN7A,PTGS1,CHI3L1,CLEC5A,FCER1G,CSF1R,THBS1,SLC8A1,CLU,ACTN1,CD14,TLR4,SNCA	enriched in myeloid cells and monocytes
LI.M111.0	0		viral sensing & immunity; IRF2 targets network (I)	LI.M111.0	0		viral sensing & immunity; IRF2 targets network (I)	LI.M111.0	0		viral sensing & immunity; IRF2 targets network (I)	LI.M111.0	0		viral sensing & immunity; IRF2 targets network (I)
LI.M76	0		DNA repair	LI.M76	0		DNA repair	LI.M76	0		DNA repair	LI.M76	0		DNA repair
LI.M213	3	CLK1,ARID4B,SREK1	regulation of transcription, transcription factors	LI.M213	0		regulation of transcription, transcription factors	LI.M213	0		regulation of transcription, transcription factors	LI.M213	0		regulation of transcription, transcription factors
LI.M174	0		TBA	LI.M174	3	MORF4L2,TNFAIP8,BZW1	TBA	LI.M174	2	RNF138,ZBTB11	TBA	LI.M174	0		TBA
LI.M74	1	SCD	transcriptional targets of glucocorticoid receptor	LI.M74	0		transcriptional targets of glucocorticoid receptor	LI.M74	2	ZC3H12D,SCD	transcriptional targets of glucocorticoid receptor	LI.M74	0		transcriptional targets of glucocorticoid receptor
LI.M4.0	0		cell cycle and transcription	LI.M4.0	63	FXYD6,HSPA6,C5AR1,FCGR1B,FCGR1A,MARCKS,IRAK3,SIRPA,ALOX5,NOD2,CSF3R,SLC15A3,HPSE,KCTD12,TNFAIP2,RBM47,RAB31,TLR2,DAPK1,CSF2RA,SLC31A2,PLXNB2,LILRB3,LILRB1,RNF130,PAICS,TNS3,WDFY3,GCA,HCK,IL1RN,CD93,CD14,SIRPB2,FPR1,SORT1,FCER1G,CD86,S100A9,SLC7A7,EPB41L3,MTMR11,RXRA,PADI4,ALDH2,CTSH,PLAUR,VCAN,NLRP12,SYK,MYOF,SERPINA1,KLF4,PRKCD,FCGR2A,IFI30,DMXL2,CHST15,SLC11A1,LILRA6,SIGLEC7,LILRA2,LILRA1	cell cycle and transcription	LI.M4.0	4	STMN1,ERCC6L,PADI4,TACC3	cell cycle and transcription	LI.M4.0	154	FAM198B,HSPA6,BUB1B,PLK1,CD33,TIMP2,C5AR1,FCGR1B,FCGR1A,S100A11,SEMA4A,MAFB,CPPED1,SKA1,TPX2,TYROBP,FGR,ESPL1,DLGAP5,IRAK3,SIRPA,BRCA1,CENPF,NOD2,ITGAX,CENPA,CLEC4E,CSF3R,CENPW,SLC15A3,KIFC1,HPSE,KCTD12,TNFAIP2,LST1,CD300LF,ORC1,RBM47,KIF23,RAB31,TLR2,CD163,DAPK1,TLR4,PTAFR,TLR8,TOP2A,CSF2RA,IGSF6,RASSF4,TROAP,RIN2,PLXNB2,STIL,LILRB3,LILRB2,LILRB1,CLEC7A,RNF130,TNS3,NEK2,HNMT,WDFY3,TFEC,NCAPH,RTN…	cell cycle and transcription
LI.M37.0	0		immune activation - generic cluster	LI.M37.0	96	HCAR3,DYSF,ORM1,RASGRP4,ENG,SLC22A4,ANPEP,CD19,MBOAT2,PTX3,S100A8,SULF2,CDK14,JAG1,FPR2,SLC24A4,C3AR1,LILRA5,LIN7A,CRISPLD2,CD300C,ARHGEF10L,OSCAR,MGAM,PLXDC2,G0S2,JAM3,VNN1,IGFBP7,GALNT6,STK32B,CD72,PRKAR2B,TREM1,NLRP3,FGD4,GAB1,TM6SF1,SLC22A15,BASP1,PTK2,SVIL,RAD54B,PADI2,CLEC4D,PFKFB4,PTGS2,PSD3,INHBA,FCAR,HAL,AQP9,CXCL1,SMPDL3A,BST1,PID1,MARCH3,DOCK5,QPCT,CR1,SLC8A1,GPR84,CDA,STX11,ANXA5,NRGN…	immune activation - generic cluster	LI.M37.0	15	CAMK4,LAT,MAL,SMC4,FAM226B,RGL4,MARCH3,CD7,S100P,FOXO1,MCM7,SLC19A2,SCD,PCBP3,UBASH3A	immune activation - generic cluster	LI.M37.0	108	MS4A4A,PRRG4,ERI2,RASGRP4,MGST1,ENG,SLC22A4,ANPEP,SIRPB1,CLEC5A,PLA2G7,S100A8,KIAA0513,HMGB2,CDK14,CXCR2,JAG1,SLC24A4,C3AR1,LILRA5,LIN7A,HNRNPLL,CHI3L1,B3GNT5,CRISPLD2,CD300C,VANGL1,ARHGEF10L,OSCAR,MGAM,PLXDC2,BLVRB,GALNT6,TREM1,MCTP1,GAS2L1,ADAP2,FGD4,SLC22A15,SVIL,MEGF9,ARAP3,BORA,RGL1,ST3GAL6,FCGR2C,CLEC4D,PFKFB4,ZNF467,MMP9,FCAR,LRRC4,CREB5,AQP9,CTSS,SMPDL3A,ADCY9,BST1,PID1,CD3G,DOCK5,QPCT,CO…	immune activation - generic cluster
LI.M11.0	0		enriched in monocytes (II)	LI.M11.0	81	FXYD6,HSPA6,LAT2,C5AR1,FCGR1B,FCGR1A,SLC15A3,MS4A7,IRAK3,LYN,PYGL,SIRPA,FCAR,CRISPLD2,FPR2,NOD2,IFI30,AQP9,CSF3R,HPSE,KCTD12,SMPDL3A,RBM47,SYK,PLXDC2,TLR2,BST1,TREM1,CSF2RA,SLC7A7,SLC31A2,IFNGR2,PLXNB2,LILRB3,LILRB1,QPCT,RNF130,TNS3,GCA,VNN3,CD93,TNFAIP2,CD14,SORT1,HCK,FCER1G,NLRP3,CD86,S100A9,S100A8,EPB41L3,MTMR11,RXRA,CDA,ALDH2,CTSH,PLAUR,NLRP12,APOBR,SERPINA1,RAB32,RAB31,SIGLEC7,SULF2,MYOF,KLF…	enriched in monocytes (II)	LI.M11.0	0		enriched in monocytes (II)	LI.M11.0	125	KCNE3,FAM198B,HSPA6,CD33,TIMP2,C5AR1,FCGR1B,FCGR1A,SLC15A3,S100A11,MS4A7,MAFB,CPPED1,TYROBP,FGR,PLA2G7,IRAK3,LYN,PYGL,SIRPA,FCAR,CRISPLD2,TBXAS1,PLBD1,HK3,NOD2,IFI30,AQP9,LRP1,CSF3R,MS4A4A,HPSE,KCTD12,SMPDL3A,LST1,RBM47,PLXDC2,TLR2,CD163,BST1,TLR4,TREM1,TLR8,CSF2RA,SLC7A7,RASSF4,MGST1,IFNGR2,RIN2,PLXNB2,LILRB3,LILRB2,LILRB1,CLEC7A,QPCT,RNF130,PILRA,TNS3,HNMT,TFEC,RTN1,GAS2L1,GRN,BLVRB,ITGAX,IL13R…	enriched in monocytes (II)
LI.M7.2	0		enriched in NK cells (I)	LI.M7.2	2	IL18RAP,XCL1	enriched in NK cells (I)	LI.M7.2	0		enriched in NK cells (I)	LI.M7.2	21	TGFBR3,KLRB1,KLRD1,CCL5,FCGR3B,PLEKHF1,RORA,EOMES,FGFBP2,SAMD3,CST7,PRKCH,S1PR5,GNLY,SH2D2A,FASLG,PRF1,PRKCQ,NKG7,GZMH,SLAMF7	enriched in NK cells (I)
LI.M7.0	0		enriched in T cells (I)	LI.M7.0	4	IL7R,UBASH3A,XCL1,TRAJ17	enriched in T cells (I)	LI.M7.0	23	RASGRP1,TRAV20,CD6,CD7,TRBC1,LEF1,UBASH3A,MAL,ZAP70,SIRPG,ICOS,CD28,NELL2,LAT,FLT3LG,GIMAP7,GATA3,ITK,LCK,ITM2A,CD247,IL32,CD3D	enriched in T cells (I)	LI.M7.0	19	KLRB1,CCL5,RASGRP1,NKG7,UBASH3A,TRAC,SLA2,RORA,EOMES,SAMD3,PRKCH,GNLY,PRF1,PRKCQ,GZMH,TIGIT,GZMK,CD3D,CD3G	enriched in T cells (I)
LI.M7.1	0		T cell activation (I)	LI.M7.1	4	IL7R,CCR7,TXK,SLAMF1	T cell activation (I)	LI.M7.1	19	RASGRP1,TCF7,CD5,CD7,CCR7,CD247,TXK,TRBC1,IKZF1,CAMK4,ZAP70,SIRPG,ICOS,CD28,LEF1,GATA3,ITK,LCK,CD3D	T cell activation (I)	LI.M7.1	18	RASGRP1,THEMIS,CCL5,CD5,TIGIT,PTPN22,SLA2,RORA,EOMES,PRKCQ,PRKCH,CD8A,ITPR3,CD8B,TRAC,SLAMF7,CD3D,CD3G	T cell activation (I)
LI.M6	0		mitotic cell division	LI.M6	0		mitotic cell division	LI.M6	0		mitotic cell division	LI.M6	9	BUB1B,PLK1,BIRC5,SKA1,AURKB,CDCA8,CENPF,CENPE,CENPA	mitotic cell division
LI.M4.5	0		mitotic cell cycle in stimulated CD4 T cells	LI.M4.5	2	ENO2,ZEB1	mitotic cell cycle in stimulated CD4 T cells	LI.M4.5	0		mitotic cell cycle in stimulated CD4 T cells	LI.M4.5	0		mitotic cell cycle in stimulated CD4 T cells
LI.S4	0		Monocyte surface signature	LI.S4	36	FXYD6,C5AR1,FCGR1B,LTBR,PECAM1,HCAR3,FCAR,DYSF,FPR1,FPR2,CSF3R,TLR2,TLR1,TREM1,IL1R2,MARCO,LILRB3,LILRB1,SLC11A1,MGAM,FCGR2A,TNFRSF1B,MBOAT7,CD93,GPER1,TNFRSF10B,S1PR3,SLC7A7,AGTRAP,IL6R,ABCA1,P2RX1,NFAM1,SLC24A4,SLC16A3,SIGLEC9	Monocyte surface signature	LI.S4	0		Monocyte surface signature	LI.S4	44	KCNE3,CD33,C5AR1,FCGR1B,LTBR,PLXND1,FCAR,CSF3R,CCR1,TLR2,CD163,TLR1,TLR4,TREM1,TNFSF12,CLEC12B,CLEC12A,LILRB3,LILRB2,LILRB1,SLC11A1,MGAM,FCGR2A,MBOAT7,SIRPB1,PTAFR,MCTP1,SLC7A7,AGTRAP,IL6R,ASGR1,LRP1,ABCA1,BRI3,NFAM1,FCGRT,GLIPR1,MFSD1,SLC24A4,P2RY2,SLC16A3,ANO10,PTPRE,SIGLEC9	Monocyte surface signature
LI.M37.1	0		enriched in neutrophils (I)	LI.M37.1	22	LIN7A,C5AR1,NLRP12,MXD1,MGAM,HCAR3,PYGL,FPR2,G0S2,KCNJ15,FPR1,FCGR2A,CSF3R,ORM1,MME,CDA,PFKFB4,VNN3,SLC22A4,BASP1,TREM1,ALPL	enriched in neutrophils (I)	LI.M37.1	0		enriched in neutrophils (I)	LI.M37.1	19	LIN7A,FCGR3A,FCGR3B,C5AR1,CHI3L1,NLRP12,MXD1,MGAM,PYGL,LRRC4,CREB5,FCGR2A,CSF3R,CDA,PROK2,PFKFB4,SLC22A4,TREM1,PTAFR	enriched in neutrophils (I)
LI.M4.2	0		PLK1 signaling events	LI.M4.2	0		PLK1 signaling events	LI.M4.2	0		PLK1 signaling events	LI.M4.2	14	BUB1B,PLK1,CEP55,KIF14,TPX2,HJURP,ASPM,ESPL1,AURKA,ASF1B,CENPE,KIF23,CKAP2L,KIF20A	PLK1 signaling events
LI.S1	0		NK cell surface signature	LI.S1	5	IL12RB2,TIE1,NCAM1,IL18RAP,DLL1	NK cell surface signature	LI.S1	0		NK cell surface signature	LI.S1	15	PDGFRB,ADRB2,S1PR5,ATP9A,KIR2DS4,PTGER2,SLCO4C1,TGFBR3,KLRC3,ENPP5,NCR1,FASLG,CX3CR1,SLAMF7,HAVCR2	NK cell surface signature
LI.M91	0		adhesion and migration, chemotaxis	LI.M91	3	CCL19,CCR7,CXCL13	adhesion and migration, chemotaxis	LI.M91	1	CCR7	adhesion and migration, chemotaxis	LI.M91	8	ANXA1,CX3CR1,CCL5,PROK2,F2R,CXCR2,ADRB2,CCR5	adhesion and migration, chemotaxis
LI.M16	0		TLR and inflammatory signaling	LI.M16	26	FCGR1A,HSPA6,C5AR1,FCGR1B,APOBR,LILRB3,KCNJ15,LILRB1,MGAM,IRAK3,MYD88,FPR2,SIGLEC9,FCAR,DYSF,FPR1,ALOX5,AQP9,CSF3R,WDFY3,TLR2,TLR1,BST1,ANPEP,LILRA6,PADI4	TLR and inflammatory signaling	LI.M16	1	PADI4	TLR and inflammatory signaling	LI.M16	30	FCGR1A,HSPA6,C5AR1,FCGR1B,APOBR,LILRB3,LILRB1,PILRA,TYROBP,MGAM,FGR,CXCR2,IRAK3,SIGLEC9,FCAR,NPL,FCGR2C,AQP9,CSF3R,LILRB2,ITGAX,KCNJ2,WDFY3,TLR2,TLR1,BST1,ANPEP,TLR4,LILRA6,TLR8	TLR and inflammatory signaling
LI.M3	0		regulation of signal transduction	LI.M3	22	PTK2,WLS,GAB1,C5AR1,PLXNB2,FZD8,SULF2,CDK14,PSD3,NOD2,LYN,FGD4,ENG,FPR1,KLF4,PRKCD,UBASH3A,HPSE,IL1RN,SYK,TLR2,BCL6	regulation of signal transduction	LI.M3	3	FOXO1,UBASH3A,GATA3	regulation of signal transduction	LI.M3	20	TIMP2,WLS,CCR1,C5AR1,PLXNB2,CSF1R,CDK14,ADAP2,NOD2,LYN,FGD4,ENG,KLF4,PRKCD,UBASH3A,HPSE,LRP1,HMOX1,TLR2,RGL1	regulation of signal transduction
LI.M5.0	0		regulation of antigen presentation and immune response	LI.M5.0	20	NFKBIA,FCGR1B,CCR7,TLR2,FCER1G,LILRB1,CD86,IRAK3,CTSH,FOS,LAT2,UBASH3A,HCK,VASP,LYN,MYD88,SYK,MEF2A,TLR1,CD19	regulation of antigen presentation and immune response	LI.M5.0	10	PLCG1,CD247,TRBC1,CCR7,ZAP70,PAG1,LCK,UBASH3A,ITK,CD3D	regulation of antigen presentation and immune response	LI.M5.0	36	NCKAP1L,THEMIS,JUN,PRKCQ,FCGR1B,TLR2,FCER1G,LILRB2,LILRB1,CLEC7A,FYN,FGR,CD86,HLA-DQB1,PAG1,IRAK3,DUSP6,PTPN22,LCP2,TLR4,FOS,CHUK,UBASH3A,HCK,VASP,LYN,MAPK14,TRAC,SLA2,RPS6KA1,HLA-DQA1,MEF2A,TLR1,PTPRC,CD3D,CD3G	regulation of antigen presentation and immune response
LI.M7.3	0		T cell activation (II)	LI.M7.3	1	SLAMF1	T cell activation (II)	LI.M7.3	7	CD247,ZAP70,SIRPG,ICOS,ITK,CD3D,LCK	T cell activation (II)	LI.M7.3	9	CCL5,TIGIT,CCR5,SLA2,NKG7,SLAMF7,PTPN7,CD3D,CD3G	T cell activation (II)
LI.M157	0		enriched in NK cells (III)	LI.M157	1	CCL4	enriched in NK cells (III)	LI.M157	0		enriched in NK cells (III)	LI.M157	7	KLRC3,RASGRP1,CX3CR1,TIGIT,C1orf21,TRGC2,PTPN4	enriched in NK cells (III)
LI.M86.0	0		chemokines and inflammatory molecules in myeloid cells	LI.M86.0	13	CXCL1,TRAF1,CXCL2,NFKBIA,CCL4,BCL2A1,G0S2,TNFAIP6,TNF,NFKB1,CCL20,IL1B,DUSP1	chemokines and inflammatory molecules in myeloid cells	LI.M86.0	0		chemokines and inflammatory molecules in myeloid cells	LI.M86.0	0		chemokines and inflammatory molecules in myeloid cells
LI.M103	0		cell cycle (III)	LI.M103	2	CDKN1A,CDK2	cell cycle (III)	LI.M103	0		cell cycle (III)	LI.M103	0		cell cycle (III)
LI.M64	0		enriched in activated dendritic cells/monocytes	LI.M64	14	CXCL1,DRAM1,G0S2,SOD2,SIRPA,IL1RN,NINJ1,TNFAIP2,SLC31A2,BASP1,MARCKS,ANPEP,SLC15A3,IL1B	enriched in activated dendritic cells/monocytes	LI.M64	0		enriched in activated dendritic cells/monocytes	LI.M64	8	DRAM1,SIRPA,NINJ1,IL13RA1,TNFAIP2,FAM129A,ANPEP,SLC15A3	enriched in activated dendritic cells/monocytes
LI.M61.0	0		enriched in NK cells (II)	LI.M61.0	0		enriched in NK cells (II)	LI.M61.0	0		enriched in NK cells (II)	LI.M61.0	5	KLRB1,NKG7,KIR2DS4,S1PR5,TGFBR3	enriched in NK cells (II)
LI.M27.0	0		chemokine cluster (I)	LI.M27.0	12	CCL4,XCL1,CCL20,CCL23,CXCL2,CXCL13,CXCL1,CXCL3,CXCL5,CXCL6,CCL18,CCL19	chemokine cluster (I)	LI.M27.0	0		chemokine cluster (I)	LI.M27.0	0		chemokine cluster (I)
LI.M43.1	0		myeloid, dendritic cell activation via NFkB (II)	LI.M43.1	8	IL1RN,IL23A,NFKBIA,PRKCD,TNIP3,ICAM1,NFKB2,BCL3	myeloid, dendritic cell activation via NFkB (II)	LI.M43.1	0		myeloid, dendritic cell activation via NFkB (II)	LI.M43.1	0		myeloid, dendritic cell activation via NFkB (II)
LI.M130	0		enriched in G-protein coupled receptors	LI.M130	1	XCL1	enriched in G-protein coupled receptors	LI.M130	0		enriched in G-protein coupled receptors	LI.M130	7	CCL5,PTGER2,F2R,ADRB2,S1PR5,ITPR3,PDE4D	enriched in G-protein coupled receptors
LI.M4.7	0		mitotic cell cycle	LI.M4.7	0		mitotic cell cycle	LI.M4.7	0		mitotic cell cycle	LI.M4.7	0		mitotic cell cycle
LI.M5.1	0		T cell activation and signaling	LI.M5.1	2	CCR7,TRAJ17	T cell activation and signaling	LI.M5.1	8	CD247,CCR7,ZAP70,PRKAR1B,ITK,TRAV20,CD3D,LCK	T cell activation and signaling	LI.M5.1	0		T cell activation and signaling
LI.M105	0		TBA	LI.M105	9	BEX1,CA2,PTX3,SLC22A4,IGFBP7,CPNE2,IRAK3,JAG1,BTBD3	TBA	LI.M105	0		TBA	LI.M105	8	H1F0,PROK2,CA2,SLC22A4,MGST1,CPNE2,IRAK3,JAG1	TBA
LI.M118.0	0		enriched in monocytes (IV)	LI.M118.0	21	PTGS2,DOCK5,ARHGEF10L,LTBR,TNFRSF1B,MGAM,PTX3,IL1R2,DOK3,HCAR3,FGD4,HAL,DYSF,SLC24A4,VNN1,RHOU,PADI4,EMILIN2,TLR1,PID1,BCL6	enriched in monocytes (IV)	LI.M118.0	1	PADI4	enriched in monocytes (IV)	LI.M118.0	22	DOCK5,ARHGEF10L,LTBR,PGD,DPYD,MGAM,LYZ,DOK3,DUSP6,MYO1F,FGD4,ST3GAL6,SLC24A4,RHOU,CXCR2,NACC2,LGALS3,CTSS,EMILIN2,TLR1,PID1,MPP1	enriched in monocytes (IV)
LI.M43.0	0		myeloid, dendritic cell activation via NFkB (I)	LI.M43.0	7	MAP3K8,IL23A,CD83,TNF,ICAM1,NFKB2,BCL3	myeloid, dendritic cell activation via NFkB (I)	LI.M43.0	0		myeloid, dendritic cell activation via NFkB (I)	LI.M43.0	0		myeloid, dendritic cell activation via NFkB (I)
LI.M11.1	0		blood coagulation	LI.M11.1	12	SLC7A7,TREM1,P2RX1,PECAM1,FCER1G,PLAUR,LYN,SIRPA,SERPINA1,GNB4,SYK,SLC16A3	blood coagulation	LI.M11.1	0		blood coagulation	LI.M11.1	10	SLC7A7,TREM1,FCER1G,DOK2,LYN,SIRPA,SERPINA1,ITGAX,SLC16A3,PSAP	blood coagulation
LI.M4.3	0		myeloid cell enriched receptors and transporters	LI.M4.3	14	SLC7A7,MYOF,MARCO,SULF2,CD86,SLC8A1,MTMR11,SLC24A4,SLC15A3,KCTD12,CHST15,CD14,SIGLEC7,LILRA1	myeloid cell enriched receptors and transporters	LI.M4.3	0		myeloid cell enriched receptors and transporters	LI.M4.3	19	SLC7A7,CCR1,LRRC25,MYOF,CD86,SLC1A3,SLC8A1,IGSF6,MTMR11,SLC24A4,ASGR1,SLC15A3,KCTD12,SLC2A6,CLEC4A,CD14,TLR8,SIGLEC7,MS4A14	myeloid cell enriched receptors and transporters
LI.M46	0		cell division stimulated CD4+ T cells	LI.M46	2	GNB4,ACTN1	cell division stimulated CD4+ T cells	LI.M46	0		cell division stimulated CD4+ T cells	LI.M46	0		cell division stimulated CD4+ T cells
LI.M49	0		transcription regulation in cell development	LI.M49	9	PLXNB2,KLF4,LYN,SOD2,VCAN,RXRA,LILRB1,SDC2,BASP1	transcription regulation in cell development	LI.M49	2	STMN1,PLCG1	transcription regulation in cell development	LI.M49	17	TIMP2,HMGB2,SEMA4A,PLXNB2,CEBPA,TAL1,ASPM,KIF4A,KLF4,LYN,BRCA1,VCAN,RXRA,LILRB1,LST1,SDC2,TYROBP	transcription regulation in cell development
LI.M73	0		enriched in monocytes (III)	LI.M73	7	CEBPB,MAML3,FOS,IER3,HCAR3,BCL6,PLXDC2	enriched in monocytes (III)	LI.M73	0		enriched in monocytes (III)	LI.M73	8	CEBPB,DUSP6,TFEC,FOS,CCR1,RIN2,PLXDC2,TIMP2	enriched in monocytes (III)
LI.S6	0		CD4 T cell surface signature Th1-stimulated	LI.S6	0		CD4 T cell surface signature Th1-stimulated	LI.S6	0		CD4 T cell surface signature Th1-stimulated	LI.S6	0		CD4 T cell surface signature Th1-stimulated
LI.M36	0		T cell surface, activation	LI.M36	2	LILRB1,LILRB3	T cell surface, activation	LI.M36	0		T cell surface, activation	LI.M36	7	LILRB4,LILRB2,LILRB1,TYROBP,CD8A,LILRB3,CD3D	T cell surface, activation
LI.M31	0		cell cycle and growth arrest	LI.M31	9	RARA,SIK1,JUNB,THBS1,PPP1R15A,OSM,IL1A,IL1B,DUSP1	cell cycle and growth arrest	LI.M31	0		cell cycle and growth arrest	LI.M31	0		cell cycle and growth arrest
LI.M20	0		AP-1 transcription factor network	LI.M20	7	JUNB,FOS,EGR1,IL6,FOSL2,ATF3,MMP1	AP-1 transcription factor network	LI.M20	0		AP-1 transcription factor network	LI.M20	0		AP-1 transcription factor network
LI.M78	0		myeloid cell cytokines, metallopeptidases and laminins	LI.M78	7	IL1RN,IL23A,IL10,MMP19,IL6,EDN1,LAMB3	myeloid cell cytokines, metallopeptidases and laminins	LI.M78	0		myeloid cell cytokines, metallopeptidases and laminins	LI.M78	0		myeloid cell cytokines, metallopeptidases and laminins
LI.M30	0		cell movement, Adhesion & Platelet activation	LI.M30	8	PDGFA,ITGB3,PTK2,TNS1,GAB1,NAV1,ESAM,GP6	cell movement, Adhesion & Platelet activation	LI.M30	0		cell movement, Adhesion & Platelet activation	LI.M30	0		cell movement, Adhesion & Platelet activation
LI.M223	0		enriched in T cells (II)	LI.M223	0		enriched in T cells (II)	LI.M223	0		enriched in T cells (II)	LI.M223	3	PLEKHF1,FGFBP2,TRGC2	enriched in T cells (II)
LI.M35.0	0		signaling in T cells (I)	LI.M35.0	6	IL2RA,JUNB,FOS,EGR1,TNF,ATF3	signaling in T cells (I)	LI.M35.0	0		signaling in T cells (I)	LI.M35.0	0		signaling in T cells (I)
LI.M29	0		proinflammatory cytokines and chemokines	LI.M29	10	PTX3,CCRL2,IL6,CCL3,CCL3L3,TNF,IL1A,C3,CCL20,IL1B	proinflammatory cytokines and chemokines	LI.M29	0		proinflammatory cytokines and chemokines	LI.M29	0		proinflammatory cytokines and chemokines
LI.M89.0	0		putative targets of PAX3	LI.M89.0	9	G0S2,CXCL2,SIK1,EGR3,CD83,EGR1,NR4A2,CDKN1A,GEM	putative targets of PAX3	LI.M89.0	0		putative targets of PAX3	LI.M89.0	0		putative targets of PAX3
LI.M4.12	0		C-MYC transcriptional network	LI.M4.12	1	BCAT1	C-MYC transcriptional network	LI.M4.12	0		C-MYC transcriptional network	LI.M4.12	4	BIRC5,CENPA,KIF11,TOP2A	C-MYC transcriptional network
LI.M4.14	0		Rho GTPase cycle	LI.M4.14	0		Rho GTPase cycle	LI.M4.14	0		Rho GTPase cycle	LI.M4.14	0		Rho GTPase cycle
LI.M15	0		Ran mediated mitosis	LI.M15	0		Ran mediated mitosis	LI.M15	0		Ran mediated mitosis	LI.M15	7	TPX2,BUB1B,PLK1,KIF15,ESPL1,AURKA,AURKB	Ran mediated mitosis
LI.M172	0		enriched for TF motif TTCNRGNNNNTTC	LI.M172	7	CXCL3,EGR3,GJB2,NRIP3,NR4A3,EDN1,PHLDA2	enriched for TF motif TTCNRGNNNNTTC	LI.M172	0		enriched for TF motif TTCNRGNNNNTTC	LI.M172	0		enriched for TF motif TTCNRGNNNNTTC
LI.S11	0		Activated (LPS) dendritic cell surface signature	LI.S11	17	ANTXR2,SLC31A2,TMCC3,F11R,ITGB8,RNF144B,CALCRL,NINJ1,CD40,IL3RA,SLC43A2,NRP2,SLC41A2,GPR157,CD274,LRRC32,ELOVL7	Activated (LPS) dendritic cell surface signature	LI.S11	0		Activated (LPS) dendritic cell surface signature	LI.S11	16	ANTXR2,CD58,F11R,RNF144B,SGPP2,NINJ1,IL3RA,LAMP2,PDCD1LG2,KITLG,SLC43A2,NRP2,PRRG4,IL13RA1,SLC41A2,SIGLEC1	Activated (LPS) dendritic cell surface signature
LI.M4.9	0		mitotic cell cycle in stimulated CD4 T cells	LI.M4.9	0		mitotic cell cycle in stimulated CD4 T cells	LI.M4.9	0		mitotic cell cycle in stimulated CD4 T cells	LI.M4.9	0		mitotic cell cycle in stimulated CD4 T cells
LI.M132	0		recruitment of neutrophils	LI.M132	4	FPR1,FPR2,C5AR1,HCAR3	recruitment of neutrophils	LI.M132	0		recruitment of neutrophils	LI.M132	0		recruitment of neutrophils
LI.M13	0		innate activation by cytosolic DNA sensing	LI.M13	4	CCL4,NFKBIA,IL6,IL1B	innate activation by cytosolic DNA sensing	LI.M13	0		innate activation by cytosolic DNA sensing	LI.M13	0		innate activation by cytosolic DNA sensing
LI.M114.0	0		TBA	LI.M114.0	11	SVIL,DOCK5,CLGN,LGALS12,JAG1,ACTN1,CPNE2,IGFBP7,NREP,BST1,BTBD3	TBA	LI.M114.0	0		TBA	LI.M114.0	14	SVIL,DOCK5,MGST1,LGALS12,FAH,ST3GAL6,JAG1,PDGFC,TAL1,ACTN1,TSPAN2,CPNE2,MLC1,BST1	TBA
LI.M4.6	0		cell division in stimulated CD4 T cells	LI.M4.6	0		cell division in stimulated CD4 T cells	LI.M4.6	0		cell division in stimulated CD4 T cells	LI.M4.6	0		cell division in stimulated CD4 T cells
LI.M27.1	0		chemokine cluster (II)	LI.M27.1	6	CXCL5,CCL4,CXCL6,XCL1,CCL20,CXCL13	chemokine cluster (II)	LI.M27.1	0		chemokine cluster (II)	LI.M27.1	5	ANXA1,CCL2,CCL5,CCR1,CCR5	chemokine cluster (II)
LI.S5	0		DC surface signature	LI.S5	24	CCRL2,CD151,ADAM12,GPR137B,ALCAM,CD83,GJB2,TFRC,JAG1,SUCNR1,TMEM51,ITPRIPL2,CALCRL,GRINA,RAMP1,SLC41A2,ABCC3,NRP1,NRP2,CXCL16,GPR157,OLR1,CD274,SDC2	DC surface signature	LI.S5	0		DC surface signature	LI.S5	44	TM2D2,SLC7A8,KMO,CD58,CCRL2,SIGLEC1,DCSTAMP,SLC36A1,PDCD1LG2,GPR137B,IL1R1,SLC6A6,DIRC2,ALCAM,GPNMB,ABHD12,EMP1,HLA-DQB1,LHFPL2,JAG1,TMEM51,SLC38A6,ITPRIPL2,GRINA,FPR3,SLC41A2,TMEM255A,LAMP2,ABCC3,DENND1B,NRP1,NRP2,CXCL16,PRRG4,CRIM1,OLR1,SDC2,SLCO2B1,SLC7A11,ADAM9,MSR1,ACE,SLC1A3,HLA-DQA1	DC surface signature
LI.M37.3	0		cell division	LI.M37.3	0		cell division	LI.M37.3	0		cell division	LI.M37.3	0		cell division
LI.M177.0	0		TBA	LI.M177.0	6	STX1A,TNFRSF12A,NR4A3,IL1RAP,NRIP3,C15orf48	TBA	LI.M177.0	0		TBA	LI.M177.0	0		TBA
LI.M4.8	0		cell division - E2F transcription network	LI.M4.8	0		cell division - E2F transcription network	LI.M4.8	0		cell division - E2F transcription network	LI.M4.8	2	E2F7,KIF4A	cell division - E2F transcription network
LI.M4.11	0		mitotic cell cycle in stimulated CD4 T cells	LI.M4.11	0		mitotic cell cycle in stimulated CD4 T cells	LI.M4.11	1	STMN1	mitotic cell cycle in stimulated CD4 T cells	LI.M4.11	0		mitotic cell cycle in stimulated CD4 T cells
LI.M94	0		growth factor induced, enriched in nuclear receptor subfamily 4	LI.M94	7	PPP1R15A,NR4A2,EGR3,CDKN1A,IL6,NR4A3,DUSP1	growth factor induced, enriched in nuclear receptor subfamily 4	LI.M94	0		growth factor induced, enriched in nuclear receptor subfamily 4	LI.M94	0		growth factor induced, enriched in nuclear receptor subfamily 4
LI.M52	0		T cell activation (IV)	LI.M52	2	XCL1,UNC93B1	T cell activation (IV)	LI.M52	4	SELL,GATA3,CD5,LCK	T cell activation (IV)	LI.M52	0		T cell activation (IV)
LI.M45	0		leukocyte activation and migration	LI.M45	2	FCER1G,CD48	leukocyte activation and migration	LI.M45	0		leukocyte activation and migration	LI.M45	0		leukocyte activation and migration
LI.M117	0		cell adhesion (GO)	LI.M117	2	NINJ1,SPOCK2	cell adhesion (GO)	LI.M117	6	CD40LG,NELL2,CD6,ZAP70,CYTIP,LEF1	cell adhesion (GO)	LI.M117	8	NINJ1,PSTPIP1,ADAM9,PTPRC,PRKCQ,SELPLG,CD300A,PLEK	cell adhesion (GO)
LI.M216	0		respiratory electron transport chain (mitochondrion)	LI.M216	0		respiratory electron transport chain (mitochondrion)	LI.M216	0		respiratory electron transport chain (mitochondrion)	LI.M216	0		respiratory electron transport chain (mitochondrion)
LI.M61.1	0		enriched in NK cells (KIR cluster)	LI.M61.1	0		enriched in NK cells (KIR cluster)	LI.M61.1	0		enriched in NK cells (KIR cluster)	LI.M61.1	0		enriched in NK cells (KIR cluster)
LI.M61.2	0		enriched in NK cells (receptor activation)	LI.M61.2	0		enriched in NK cells (receptor activation)	LI.M61.2	0		enriched in NK cells (receptor activation)	LI.M61.2	0		enriched in NK cells (receptor activation)
LI.M62.0	0		T & B cell development, activation	LI.M62.0	7	PTK2,GAB1,PSD3,SCD,NAV1,UBASH3A,STK32B	T & B cell development, activation	LI.M62.0	0		T & B cell development, activation	LI.M62.0	0		T & B cell development, activation
LI.M55	0		TBA	LI.M55	8	RARA,RASGRP4,GRINA,PRKCD,DOK3,PDLIM7,MBOAT7,CSF3R	TBA	LI.M55	0		TBA	LI.M55	11	LRP1,RASGRP4,SPI1,GRINA,PRKCD,DOK3,PDLIM7,MBOAT7,CSF3R,RHOG,ZYX	TBA
LI.M4.13	0		cell junction (GO)	LI.M4.13	8	KCTD12,EPB41L3,PRKCD,IFI30,TNS3,HCK,HOMER3,CTNNA1	cell junction (GO)	LI.M4.13	0		cell junction (GO)	LI.M4.13	9	LCP1,KCTD12,EPB41L3,PRKCD,IFI30,TNS3,HCK,HOMER3,CTNNA1	cell junction (GO)
LI.M21	0		cell adhesion (lymphocyte homing)	LI.M21	5	SDK2,PTK2,CD72,CCR7,CXCL13	cell adhesion (lymphocyte homing)	LI.M21	0		cell adhesion (lymphocyte homing)	LI.M21	1	VAV1	cell adhesion (lymphocyte homing)
LI.M10.0	0		E2F1 targets (Q3)	LI.M10.0	0		E2F1 targets (Q3)	LI.M10.0	0		E2F1 targets (Q3)	LI.M10.0	0		E2F1 targets (Q3)
LI.M190	0		TBA	LI.M190	3	OSM,IL1A,IL1B	TBA	LI.M190	0		TBA	LI.M190	0		TBA
LI.M93	0		TBA	LI.M93	4	LIF,IL23A,TNF,OSM	TBA	LI.M93	0		TBA	LI.M93	0		TBA
LI.S0	0		T cell surface signature	LI.S0	0		T cell surface signature	LI.S0	11	NPDC1,ANKH,CD6,SLC37A3,SIRPG,ICOS,CD28,FLT3LG,GIMAP2,ITM2A,MAL	T cell surface signature	LI.S0	0		T cell surface signature
LI.M87	0		transmembrane transport (I)	LI.M87	10	VDR,SLC7A7,SLC31A2,TLR2,NLRP3,SLC11A1,DAPK1,AQP9,SLC15A3,SLC22A4	transmembrane transport (I)	LI.M87	0		transmembrane transport (I)	LI.M87	12	VDR,SLC7A7,SLC4A1,TLR2,SLC11A1,DAPK1,HK3,AQP9,SLC15A3,HMOX1,SLC22A4,TLR4	transmembrane transport (I)
LI.M118.1	0		enriched in monocytes (surface)	LI.M118.1	7	LTBR,TNFRSF1B,S1PR3,SLC24A4,SLC16A3,NFAM1,IL1R2	enriched in monocytes (surface)	LI.M118.1	0		enriched in monocytes (surface)	LI.M118.1	5	LTBR,MCTP1,SLC24A4,SLC16A3,NFAM1	enriched in monocytes (surface)
LI.M60	0		lymphocyte generic cluster	LI.M60	3	GAB1,NAV1,CD19	lymphocyte generic cluster	LI.M60	1	CD28	lymphocyte generic cluster	LI.M60	2	SH2D2A,CLIP4	lymphocyte generic cluster
LI.M56	0		suppression of MAPK signaling	LI.M56	8	HSPA6,RASGRP4,FOS,CD14,IL1B,DUSP1,IL1R2,DUSP3	suppression of MAPK signaling	LI.M56	0		suppression of MAPK signaling	LI.M56	8	HSPA6,RASGRP4,FOS,CD14,ARRB2,ARRB1,DUSP6,DUSP1	suppression of MAPK signaling
LI.M38	0		chemokines and receptors	LI.M38	4	CCL4,TNF,ICAM1,HCK	chemokines and receptors	LI.M38	0		chemokines and receptors	LI.M38	5	CCL2,CCL5,ICAM1,HCK,CCR5	chemokines and receptors
LI.M84	0		integrins and cell adhesion	LI.M84	0		integrins and cell adhesion	LI.M84	0		integrins and cell adhesion	LI.M84	0		integrins and cell adhesion
LI.M53	0		inflammasome receptors and signaling	LI.M53	6	NLRP3,NFKBIA,BIRC2,RXRA,RIPK2,NOD2	inflammasome receptors and signaling	LI.M53	0		inflammasome receptors and signaling	LI.M53	5	TNFAIP3,RXRA,TLR4,NOD2,NLRC4	inflammasome receptors and signaling
LI.M89.1	0		putative targets of PAX3	LI.M89.1	7	EGR3,CD83,INHBA,NR4A2,RGS1,DUSP1,ATF3	putative targets of PAX3	LI.M89.1	0		putative targets of PAX3	LI.M89.1	0		putative targets of PAX3
LI.M1.0	0		integrin cell surface interactions (I)	LI.M1.0	11	ITGA9,PTK2,TNC,ITGA5,MYL9,ITGB3,COL4A2,LAMC1,ITGAV,MET,COL6A3	integrin cell surface interactions (I)	LI.M1.0	0		integrin cell surface interactions (I)	LI.M1.0	0		integrin cell surface interactions (I)
LI.M165	0		enriched in activated dendritic cells (II)	LI.M165	12	CSF2RA,TNFAIP6,DOCK4,IFNGR2,CCL20,RBM47,DAPK1,LAMP3,DSE,BCL2A1,PRKAR2B,ATF3	enriched in activated dendritic cells (II)	LI.M165	0		enriched in activated dendritic cells (II)	LI.M165	16	CSF2RA,DOCK4,MGST1,IFNGR2,HLX,SERPING1,ST3GAL6,RBM47,DAPK1,PRRG4,PDGFC,DSE,IL18,FAM20C,SIGLEC1,ATF3	enriched in activated dendritic cells (II)
LI.M8	0		E2F transcription factor network	LI.M8	0		E2F transcription factor network	LI.M8	0		E2F transcription factor network	LI.M8	0		E2F transcription factor network
LI.M19	0		T cell differentiation (Th2)	LI.M19	2	UBASH3A,PKIA	T cell differentiation (Th2)	LI.M19	8	UBASH3A,CD28,LCK,LAT,ITM2A,IL32,GATA3,MAL	T cell differentiation (Th2)	LI.M19	4	UBASH3A,HNRNPLL,GZMK,CD3G	T cell differentiation (Th2)
LI.M109	0		receptors, cell migration	LI.M109	4	C3AR1,IL6R,TRIB1,CCR7	receptors, cell migration	LI.M109	3	CCR7,LEF1,GATA3	receptors, cell migration	LI.M109	6	TGFBR3,NCKAP1L,C3AR1,IL6R,CCR1,TRIB1	receptors, cell migration
LI.M23	0		RA, WNT, CSF receptors network (monocyte)	LI.M23	7	RARA,FZD1,CSF2RA,FOS,RXRA,PTGS2,CSF3R	RA, WNT, CSF receptors network (monocyte)	LI.M23	0		RA, WNT, CSF receptors network (monocyte)	LI.M23	8	FZD1,CEBPA,CSF2RA,FOS,CSF1R,RXRA,SPI1,CSF3R	RA, WNT, CSF receptors network (monocyte)
LI.M18	0		T cell differentiation via ITK and PKC	LI.M18	1	SPOCK2	T cell differentiation via ITK and PKC	LI.M18	4	SIRPG,ITK,ITM2A,ABLIM1	T cell differentiation via ITK and PKC	LI.M18	0		T cell differentiation via ITK and PKC
LI.M168	0		enriched in dendritic cells	LI.M168	7	JAG1,EMILIN2,CA2,RRAGD,CTSL,GGTA1P,CAPG	enriched in dendritic cells	LI.M168	0		enriched in dendritic cells	LI.M168	14	B3GNT5,PGD,JAG1,EMILIN2,CLEC5A,CA2,CTSB,FAM20C,ADAM9,RRAGD,CTSL,IL1R1,DAB2,CAPG	enriched in dendritic cells
LI.M42	0		platelet activation (III)	LI.M42	5	FCER1G,GNAQ,SYK,GNA15,LYN	platelet activation (III)	LI.M42	0		platelet activation (III)	LI.M42	7	FCER1G,GNAQ,VAV1,PIK3R5,GNA15,LCP2,LYN	platelet activation (III)
LI.M160	0		leukocyte differentiation	LI.M160	9	RARA,LIF,BTG2,CD83,JUNB,NR4A2,IL1A,NFKB2,BCL3	leukocyte differentiation	LI.M160	0		leukocyte differentiation	LI.M160	0		leukocyte differentiation
LI.M7.4	0		T cell activation (III)	LI.M7.4	0		T cell activation (III)	LI.M7.4	5	RASGRP1,NELL2,CAMK4,LCK,LEF1	T cell activation (III)	LI.M7.4	5	RASGRP1,THEMIS,RORA,ZMYND11,PRKCQ	T cell activation (III)
LI.M0	0		targets of FOSL1/2	LI.M0	5	LIF,IL6,THBD,MMP2,MMP1	targets of FOSL1/2	LI.M0	0		targets of FOSL1/2	LI.M0	0		targets of FOSL1/2
LI.M72.2	0		TBA	LI.M72.2	1	RNF111	TBA	LI.M72.2	0		TBA	LI.M72.2	0		TBA
LI.M198	0		TBA	LI.M198	6	CEBPB,PDLIM7,CCNJL,PISD,PHC2,LYN	TBA	LI.M198	0		TBA	LI.M198	8	CEBPB,PDLIM7,LST1,PISD,TECPR2,PHC2,LYN,CPPED1	TBA
LI.M79	0		TBA	LI.M79	5	CXCL3,MGAM,SULF2,AQP9,ANPEP	TBA	LI.M79	0		TBA	LI.M79	7	TFEC,DPYD,MGAM,FAM20C,AQP9,ANPEP,TBXAS1	TBA
LI.M115	0		cytokines - recepters cluster	LI.M115	7	IL7R,IL2RA,LIF,IL23A,CSF3,IL6,IL10	cytokines - recepters cluster	LI.M115	0		cytokines - recepters cluster	LI.M115	0		cytokines - recepters cluster
LI.M208	0		TBA	LI.M208	3	APP,ARHGAP5,CCL23	TBA	LI.M208	0		TBA	LI.M208	0		TBA
LI.M24	0		cell activation (IL15, IL23, TNF)	LI.M24	7	SBNO2,MAP3K8,IL23A,CD83,TNF,NFKB2,BCL3	cell activation (IL15, IL23, TNF)	LI.M24	0		cell activation (IL15, IL23, TNF)	LI.M24	0		cell activation (IL15, IL23, TNF)
LI.M85	0		platelet activation and degranulation	LI.M85	5	SERPINA1,F3,TIMP1,THBS1,SERPINE1	platelet activation and degranulation	LI.M85	0		platelet activation and degranulation	LI.M85	0		platelet activation and degranulation
LI.M163	0		enriched in neutrophils (II)	LI.M163	4	HSPA6,DENND3,MBOAT7,BEST1	enriched in neutrophils (II)	LI.M163	0		enriched in neutrophils (II)	LI.M163	8	NPL,ARAP3,HSPA6,TYROBP,FRAT2,MBOAT7,TSPAN2,BEST1	enriched in neutrophils (II)
LI.M123	0		enriched in B cell differentiation	LI.M123	3	GAB1,DLL1,NR4A3	enriched in B cell differentiation	LI.M123	0		enriched in B cell differentiation	LI.M123	0		enriched in B cell differentiation
LI.M35.1	0		signaling in T cells (II)	LI.M35.1	3	IL2RA,TNF,TNFRSF18	signaling in T cells (II)	LI.M35.1	0		signaling in T cells (II)	LI.M35.1	0		signaling in T cells (II)
LI.M119	0		enriched in activated dendritic cells (I)	LI.M119	6	IL1RN,CXCL2,CD83,PRKCD,CD86,PLXDC2	enriched in activated dendritic cells (I)	LI.M119	0		enriched in activated dendritic cells (I)	LI.M119	0		enriched in activated dendritic cells (I)
LI.M131	0		TBA	LI.M131	4	ACTN1,INHBA,PRKAR2B,TNS1	TBA	LI.M131	3	HEMGN,RGL4,S100P	TBA	LI.M131	0		TBA
LI.M86.1	0		proinflammatory dendritic cell, myeloid cell response	LI.M86.1	6	CCL4,TNFAIP6,SERPINB9,TNF,CCL20,IL1B	proinflammatory dendritic cell, myeloid cell response	LI.M86.1	0		proinflammatory dendritic cell, myeloid cell response	LI.M86.1	0		proinflammatory dendritic cell, myeloid cell response
LI.M95.1	0		enriched in antigen presentation (III)	LI.M95.1	4	CD53,ICAM1,LAPTM5,HLA-DRB5	enriched in antigen presentation (III)	LI.M95.1	0		enriched in antigen presentation (III)	LI.M95.1	0		enriched in antigen presentation (III)
LI.M80	0		TBA	LI.M80	6	PTK2,ENG,GNG11,GAB1,MARCH3,GPR132	TBA	LI.M80	1	2021-03-03	TBA	LI.M80	3	ENG,RGL1,CRIM1	TBA
LI.M151	0		TBA	LI.M151	2	INHBA,ADAM12	TBA	LI.M151	0		TBA	LI.M151	0		TBA
LI.M177.1	0		TBA	LI.M177.1	1	NR4A3	TBA	LI.M177.1	0		TBA	LI.M177.1	1	CX3CR1	TBA
LI.M51	0		cell adhesion	LI.M51	8	IL1B,JAM3,THBS1,PARVB,ITGB3,ENG,TNC,ESAM	cell adhesion	LI.M51	0		cell adhesion	LI.M51	0		cell adhesion
LI.M2.0	0		extracellular matrix (I)	LI.M2.0	7	VCAN,THBS1,FSTL1,SPP1,COL4A2,COL6A3,MMP2	extracellular matrix (I)	LI.M2.0	0		extracellular matrix (I)	LI.M2.0	0		extracellular matrix (I)
LI.M11.2	0		formyl peptide receptor mediated neutrophil response	LI.M11.2	3	SLC11A1,FPR1,FCGR2A	formyl peptide receptor mediated neutrophil response	LI.M11.2	0		formyl peptide receptor mediated neutrophil response	LI.M11.2	5	NCF2,SLC11A1,IGSF6,FCGR2A,PILRA	formyl peptide receptor mediated neutrophil response
LI.M95.0	0		enriched in antigen presentation (II)	LI.M95.0	2	CD53,HLA-DRB5	enriched in antigen presentation (II)	LI.M95.0	1	SELL	enriched in antigen presentation (II)	LI.M95.0	0		enriched in antigen presentation (II)
LI.M159	0		G protein mediated calcium signaling	LI.M159	5	GNAQ,GNA15,GNG11,PRKAR2B,GNAI1	G protein mediated calcium signaling	LI.M159	0		G protein mediated calcium signaling	LI.M159	0		G protein mediated calcium signaling
LI.M155	0		G protein coupled receptors cluster	LI.M155	4	S1PR3,C3AR1,FPR2,FPR1	G protein coupled receptors cluster	LI.M155	0		G protein coupled receptors cluster	LI.M155	0		G protein coupled receptors cluster
LI.M238	0		respiratory electron transport chain (mitochondrion)	LI.M238	0		respiratory electron transport chain (mitochondrion)	LI.M238	0		respiratory electron transport chain (mitochondrion)	LI.M238	0		respiratory electron transport chain (mitochondrion)
LI.M150	0		innate antiviral response	LI.M150	0		innate antiviral response	LI.M150	0		innate antiviral response	LI.M150	0		innate antiviral response
LI.S2	0		B cell surface signature	LI.S2	0		B cell surface signature	LI.S2	4	PDZK1IP1,LRRC19,CXADR,HHLA2	B cell surface signature	LI.S2	3	FLRT2,CSPG4,PDPN	B cell surface signature
LI.M75	0		antiviral IFN signature	LI.M75	0		antiviral IFN signature	LI.M75	0		antiviral IFN signature	LI.M75	0		antiviral IFN signature
LI.M245	0		translation initiation factor 3 complex	LI.M245	0		translation initiation factor 3 complex	LI.M245	11	EIF3H,UXT,EIF3K,EIF3D,EIF3E,EIF3F,TUT1,RPL3,EIF3G,EEF1B2,FBL	translation initiation factor 3 complex	LI.M245	0		translation initiation factor 3 complex
LI.M69	0		enriched in B cells (VI)	LI.M69	0		enriched in B cells (VI)	LI.M69	0		enriched in B cells (VI)	LI.M69	0		enriched in B cells (VI)
LI.M71	0		enriched in antigen presentation (I)	LI.M71	0		enriched in antigen presentation (I)	LI.M71	0		enriched in antigen presentation (I)	LI.M71	7	CYP1B1,HMOX1,RTN1,HLA-DQB1,FAR2,ITPR3,HLA-DQA1	enriched in antigen presentation (I)
LI.M54	0		BCR signaling	LI.M54	0		BCR signaling	LI.M54	1	PIK3CD	BCR signaling	LI.M54	4	VAV1,PIK3R5,PIK3R3,LYN	BCR signaling
LI.M67	0		activated dendritic cells	LI.M67	0		activated dendritic cells	LI.M67	0		activated dendritic cells	LI.M67	0		activated dendritic cells
LI.M58	0		B cell development/activation	LI.M58	0		B cell development/activation	LI.M58	1	PIK3CD	B cell development/activation	LI.M58	0		B cell development/activation
LI.M14	0		T cell differentiation	LI.M14	0		T cell differentiation	LI.M14	8	UBASH3A,TCF7,CD28,TXK,ITK,NOG,RASGRP1,MAL	T cell differentiation	LI.M14	0		T cell differentiation
LI.M68	0		RIG-1 like receptor signaling	LI.M68	0		RIG-1 like receptor signaling	LI.M68	0		RIG-1 like receptor signaling	LI.M68	0		RIG-1 like receptor signaling
LI.M104	0		TBA	LI.M104	0		TBA	LI.M104	1	MLLT3	TBA	LI.M104	0		TBA
LI.M83	0		enriched in naive and memory B cells	LI.M83	0		enriched in naive and memory B cells	LI.M83	0		enriched in naive and memory B cells	LI.M83	0		enriched in naive and memory B cells
LI.M47.4	0		enriched in B cells (V)	LI.M47.4	0		enriched in B cells (V)	LI.M47.4	0		enriched in B cells (V)	LI.M47.4	0		enriched in B cells (V)
LI.M178	0		enriched for promoter motif NATCACGTGAY (putative SREBF1 targets)	LI.M178	0		enriched for promoter motif NATCACGTGAY (putative SREBF1 targets)	LI.M178	0		enriched for promoter motif NATCACGTGAY (putative SREBF1 targets)	LI.M178	0		enriched for promoter motif NATCACGTGAY (putative SREBF1 targets)
LI.M66	0		TBA	LI.M66	0		TBA	LI.M66	0		TBA	LI.M66	12	FCER1G,CYP1B1,KMO,SLC7A7,HMOX1,KYNU,CYBB,ADAP2,IFI30,CST3,MAFB,CPVL	TBA
LI.M12	0		CD28 costimulation	LI.M12	0		CD28 costimulation	LI.M12	5	CD28,THEM4,LAT,SPNS1,LCK	CD28 costimulation	LI.M12	0		CD28 costimulation
LI.M126	0		double positive thymocytes	LI.M126	0		double positive thymocytes	LI.M126	5	UBASH3A,APBB1,PCSK5,LAT,SPNS1	double positive thymocytes	LI.M126	0		double positive thymocytes
LI.S10	0		Resting dendritic cell surface signature	LI.S10	0		Resting dendritic cell surface signature	LI.S10	1	SERINC5	Resting dendritic cell surface signature	LI.S10	44	SLC7A8,IGSF6,CCRL2,DCSTAMP,SLC36A1,GPR137B,STAB1,CD86,IL1R1,IFNGR1,FZD1,DIRC2,CSF1R,GPNMB,ABHD12,KMO,EMP1,HLA-DQB1,LHFPL2,SLC1A3,JAG1,PLXDC2,TMEM51,SFXN3,SLC38A6,ITPRIPL2,ENG,MFSD1,TTYH3,TMEM144,TMEM255A,ABCC3,PLXND1,DENND1B,NRP1,SLC27A3,SLCO2B1,ITGAX,SLC26A11,CRIM1,PLD3,SLC7A11,ADAM9,ACE	Resting dendritic cell surface signature
LI.M37.2	0		endoplasmic reticulum	LI.M37.2	0		endoplasmic reticulum	LI.M37.2	1	SCD	endoplasmic reticulum	LI.M37.2	0		endoplasmic reticulum
LI.M9	0		B cell development	LI.M9	0		B cell development	LI.M9	2	LTA,CCR7	B cell development	LI.M9	3	SPI1,TLR4,LYN	B cell development
LI.M134	0		Membrane, ER proteins	LI.M134	0		Membrane, ER proteins	LI.M134	0		Membrane, ER proteins	LI.M134	0		Membrane, ER proteins
LI.M121	0		TBA	LI.M121	0		TBA	LI.M121	0		TBA	LI.M121	1	SLAMF7	TBA
LI.M39	0		integrin mediated leukocyte migration	LI.M39	0		integrin mediated leukocyte migration	LI.M39	4	TXK,ITK,PIK3CD,PLCG1	integrin mediated leukocyte migration	LI.M39	0		integrin mediated leukocyte migration
LI.S9	0		Memory B cell surface signature	LI.S9	0		Memory B cell surface signature	LI.S9	1	CXADR	Memory B cell surface signature	LI.S9	0		Memory B cell surface signature
LI.M65	0		IL2, IL7, TCR network	LI.M65	0		IL2, IL7, TCR network	LI.M65	7	ITK,LTB,TRAV20,TRBC1,JAK3,CCR7,LCK	IL2, IL7, TCR network	LI.M65	0		IL2, IL7, TCR network
LI.M28	0		antigen presentation (lipids and proteins)	LI.M28	0		antigen presentation (lipids and proteins)	LI.M28	1	CCR7	antigen presentation (lipids and proteins)	LI.M28	0		antigen presentation (lipids and proteins)
LI.M102	0		TBA	LI.M102	0		TBA	LI.M102	0		TBA	LI.M102	0		TBA
LI.M77	0		collagen, TGFB family et al	LI.M77	0		collagen, TGFB family et al	LI.M77	3	GATA3,COL6A3,COL6A2	collagen, TGFB family et al	LI.M77	0		collagen, TGFB family et al
LI.M97	0		enriched for SMAD2/3 signaling	LI.M97	0		enriched for SMAD2/3 signaling	LI.M97	1	GATA3	enriched for SMAD2/3 signaling	LI.M97	0		enriched for SMAD2/3 signaling
LI.M4.15	0		enriched in monocytes (I)	LI.M4.15	0		enriched in monocytes (I)	LI.M4.15	0		enriched in monocytes (I)	LI.M4.15	7	EPB41L3,DPYSL2,RTN1,LGALS3,HCK,APLP2,LGALS1	enriched in monocytes (I)
LI.M137	0		TBA	LI.M137	0		TBA	LI.M137	2	TCERG1,SREK1	TBA	LI.M137	0		TBA
LI.M240	0		chromosome Y linked	LI.M240	0		chromosome Y linked	LI.M240	0		chromosome Y linked	LI.M240	7	UTY,TTTY15,USP9Y,KDM5D,BCORP1,PRKY,DDX3Y	chromosome Y linked
LI.M40	0		complement and other receptors in DCs	LI.M40	0		complement and other receptors in DCs	LI.M40	0		complement and other receptors in DCs	LI.M40	12	ITGAX,SIRPA,OLR1,TYROBP,CD58,C1QC,C1QB,C1QA,CD86,HLA-DQB1,TLR8,HLA-DQA1	complement and other receptors in DCs
LI.M180	0		TBA	LI.M180	0		TBA	LI.M180	0		TBA	LI.M180	8	OSTM1,SIRT1,NPTN,CHUK,ROCK1,SYNJ1,ACSL4,ATF2	TBA
LI.M33	0		inflammatory response	LI.M33	0		inflammatory response	LI.M33	0		inflammatory response	LI.M33	8	TBC1D8,FCER1G,STAB1,TYROBP,ARRB2,TLR4,APOBR,AIF1	inflammatory response
LI.M48	0		TBA	LI.M48	0		TBA	LI.M48	0		TBA	LI.M48	9	STAB1,TYROBP,SH3TC1,DOK2,SPI1,PTAFR,TLR4,APOBR,LYN	TBA
LI.M212	0		purine nucleotide biosynthesis	LI.M212	0		purine nucleotide biosynthesis	LI.M212	0		purine nucleotide biosynthesis	LI.M212	0		purine nucleotide biosynthesis
LI.M204.0	0		chaperonin mediated protein folding (I)	LI.M204.0	0		chaperonin mediated protein folding (I)	LI.M204.0	0		chaperonin mediated protein folding (I)	LI.M204.0	0		chaperonin mediated protein folding (I)
LI.M139	0		lysosomal/endosomal proteins	LI.M139	0		lysosomal/endosomal proteins	LI.M139	0		lysosomal/endosomal proteins	LI.M139	9	SLC11A1,PSAP,CTSB,CTSD,NPC2,AP1S2,SORT1,CTSS,GAA	lysosomal/endosomal proteins
LI.M100	0		MAPK, RAS signaling	LI.M100	0		MAPK, RAS signaling	LI.M100	0		MAPK, RAS signaling	LI.M100	5	RASGRP4,TGFB1,MAP3K11,ARRB2,FLNA	MAPK, RAS signaling
LI.M113	0		golgi membrane (I)	LI.M113	0		golgi membrane (I)	LI.M113	0		golgi membrane (I)	LI.M113	7	B3GNT5,FAM198B,WLS,PDGFC,SGMS2,SORT1,TLR8	golgi membrane (I)
LI.M148	0		TBA	LI.M148	0		TBA	LI.M148	0		TBA	LI.M148	7	SEC23A,SPAST,ADAM9,STXBP3,SYNJ1,SEC24B,TMEM30A	TBA
LI.M214	0		TBA	LI.M214	0		TBA	LI.M214	0		TBA	LI.M214	9	RP2,SOS2,CHUK,ZFAND6,STXBP3,ATP11B,TMEM30A,SPAST,LPGAT1	TBA
LI.M32.0	0		platelet activation (I)	LI.M32.0	0		platelet activation (I)	LI.M32.0	0		platelet activation (I)	LI.M32.0	11	TGFB1,GNAI2,ZYX,POR,TLN1,NR1H2,GNB2,PPP1CA,PFN1,FLNA,NRBP1	platelet activation (I)
LI.M209	0		lysosome	LI.M209	0		lysosome	LI.M209	0		lysosome	LI.M209	7	GNS,CTSB,GM2A,PSAP,CTSZ,CTSL,SORT1	lysosome
LI.M32.1	0		platelet activation (II)	LI.M32.1	0		platelet activation (II)	LI.M32.1	0		platelet activation (II)	LI.M32.1	10	TGFB1,TLN1,GNB2,MAP7D1,ZYX,NBEAL2,FLNA,PFN1,GNAI2,PNPLA6	platelet activation (II)
LI.M112.0	0		complement activation (I)	LI.M112.0	0		complement activation (I)	LI.M112.0	0		complement activation (I)	LI.M112.0	8	SERPING1,C3AR1,C1QC,C1QB,C1QA,C3,C5AR1,A2M	complement activation (I)
LI.M32.3	0		KLF12 targets network	LI.M32.3	0		KLF12 targets network	LI.M32.3	0		KLF12 targets network	LI.M32.3	8	NRBP1,NR1H2,RHOG,POR,GNB2,CLPTM1,GNAI2,NBEAL2	KLF12 targets network
LI.M242	0		TBA	LI.M242	0		TBA	LI.M242	0		TBA	LI.M242	7	SNX14,SNX13,MAP3K2,ACAP2,MED1,DYRK1A,CREBBP	TBA
LI.M32.8	0		cytoskeletal remodeling	LI.M32.8	0		cytoskeletal remodeling	LI.M32.8	0		cytoskeletal remodeling	LI.M32.8	6	TGFB1,SPTAN1,TLN1,MAP7D1,FLNA,ZYX	cytoskeletal remodeling
LI.M181	0		nucleotide metabolism	LI.M181	0		nucleotide metabolism	LI.M181	0		nucleotide metabolism	LI.M181	0		nucleotide metabolism
LI.M57	0		immuregulation - monocytes, T and B cells	LI.M57	0		immuregulation - monocytes, T and B cells	LI.M57	0		immuregulation - monocytes, T and B cells	LI.M57	0		immuregulation - monocytes, T and B cells
LI.M140	0		extracellular matrix, complement	LI.M140	0		extracellular matrix, complement	LI.M140	0		extracellular matrix, complement	LI.M140	5	CRISPLD2,LTBP2,FLRT2,MMP9,TIMP2	extracellular matrix, complement
LI.M63	0		regulation of localization (GO)	LI.M63	0		regulation of localization (GO)	LI.M63	0		regulation of localization (GO)	LI.M63	5	TGFB1,ARAP1,STXBP2,FLNA,NR1H2	regulation of localization (GO)
LI.M215	0		small GTPase mediated signal transduction	LI.M215	0		small GTPase mediated signal transduction	LI.M215	0		small GTPase mediated signal transduction	LI.M215	5	ARAP1,GMIP,VAV1,ARHGAP30,RHOG	small GTPase mediated signal transduction
LI.M106.0	0		nuclear pore complex	LI.M106.0	0		nuclear pore complex	LI.M106.0	0		nuclear pore complex	LI.M106.0	1	NUP85	nuclear pore complex
LI.M59	0		CCR1, 7 and cell signaling	LI.M59	0		CCR1, 7 and cell signaling	LI.M59	0		CCR1, 7 and cell signaling	LI.M59	5	DUSP6,TIMP2,MAPK14,CCR1,TRIB1	CCR1, 7 and cell signaling
LI.M147	0		intracellular transport	LI.M147	0		intracellular transport	LI.M147	0		intracellular transport	LI.M147	7	SIRT1,EXOC1,VPS4B,ZFYVE16,ZFAND6,PPP1R12A,RAD21	intracellular transport
