# Supplementary material for: Inflammation and immune activation are associated with risk of Mycobacterium tuberculosis infection in BCG-vaccinated infants
Source: Research Square preprint supplement (doi:10.21203/rs.3.rs-1632594/v1), 2022-05-17
Supplement: Supplementary file 6 [file 858322e35076870e8c4ceeca.xlsx]

## Sheet: Supplementary Table 7
Supplementary Table 7: Difference of immune parameters between CMV-infected and CMV-uninfected infants. Mann-Whitney test is used for comparison of medians.
Immune parameter	P-value	median(CMV-infected) - median (CMV-uninfected)	B-H adjusted p-value
ELISpot BCG	0.0148767	-10	0.0694246
ELISpot CMV	2.77276e-07	8	3.45055e-06
ELISpot EBV	0.903658	0	0.982618
ELISpot PPD	0.0355298	-5	0.117039
MGIA 1x10^6	0.662822	-0.000193389	0.815781
MGIA 3x10^6	0.967437	-4.5503e-05	1
Ag85A IgG (D0)	0.367075	-0.025	0.604594
WCL IgG (D0)	0.593368	-0.015	0.78624
Ag85A IgG (D28)	0.394826	0.01	0.622823
WCL IgG (D28)	0.922841	0.01	0.993829
Lymphocytes	0.0444331	4.3	0.142186
CD4 cells	4.15034e-06	-13.35	3.87365e-05
Activated CD4	0.0243435	2.85	0.0961407
Regulatory CD4	0.00335066	-0.32	0.0197512
CD8 cells	4.20633e-08	13.85	5.88886e-07
Activated CD8	3.26157e-10	20.05	7.30591e-09
Regulatory CD8	0.133489	0.12	0.305117
Non activated monocytes (suppressors)	0.94277	-0.035	1
Activated monocytes	0.779512	-1.2	0.892632
Inflammatory monocytes	0.53544	-1.32	0.740362
B cells	1	0.25	1
NK cells	0.023743	1.25	0.0961407
Non CD3 NK cells	0.171101	-1.015	0.354877
NKT cells	1.56698e-05	3.39	0.000131618
Bright NK cells CD16+	0.0258681	-0.075	0.0965743
Bright NK cells CD16-	0.0861937	-0.125	0.241342
CD16+ NK cells	0.649377	-0.12	0.815781
CD16- NK cells	0.22416	-0.96	0.432861
CD4+CD26+	1.64523e-05	-4.25	0.000131618
CD4+CD27+	1.76649e-06	-2.85	1.79861e-05
CD4+CD161+	0.98768	-0.015	1
CD4 MAITS	0.781053	-0.01	0.892632
CD4 MAITS CD27+	0.339899	-0.07	0.585673
CD4 MAITS CD26+	0.335221	-0.06	0.585673
CD4 MAITS CD161+	0.292147	-2.77556e-17	0.545342
CD8+CD26+	7.22306e-11	-34.7	2.69661e-09
CD8+CD27+	1.80579e-13	-24.6	1.01124e-11
CD8+CD161+	0.000188847	-2.005	0.00141006
CD8 MAITS	0.347847	-0.35	0.590286
CD8 MAITS CD27+	1.30646e-08	-1.92	2.2072e-07
CD8 MAITS CD26+	1.3795e-08	-2.705	2.2072e-07
CD8 MAITS CD161+	0.000360689	-0.5	0.00252482
CD163+ Monocytes (anti-Inflammatory)	0.0108556	-7.89012	0.0540605
Transitional-Regulatory B cells	1	0.65	1
Plasmoblasts1	0.0285307	-0.665	0.0999988
Plasmoblasts2	0.951815	-0.13	1
Plasmoblasts3	0.11058	-0.08	0.269238
Immature B cells	0.517122	0.695	0.723971
IgG+CD5+ B cells	0.0788716	0.45	0.226503
Memory B cells	0.164569	-0.315	0.354151
Naive B cells	0.6117	0.05	0.796633
CD5+ B cells	0.130853	3.05	0.305117
CD24+ B cells	0.751472	-0.55	0.886525
CD27+ B cells	0.0958282	-0.71	0.255123
CD38+ B cells	0.462436	1.95	0.664011
IgD+ B cells	0.976857	0	1
IgG+ B cells	0.312327	0.785	0.564204
Inhibitory CD4 cells	0.0025709	1.73	0.0159967
Inhibitory CD8 cells	0.0178447	2.245	0.079944
Monocytes	0.0762145	-1.46	0.224632
ML ratio	0.0285711	-0.0647185	0.0999988
Gamma delta cells	0.65628	0.185	0.815781
EGF	0.302758	4.40592	0.555883
Eotaxin/CCL11	0.805262	-9.92247	0.911003
FGF-2	0.258808	9.00735	0.491297
Fractalkine	0.83734	3.83023	0.928536
G-CSF	0.40698	13.233	0.63308
GM-CSF	0.440311	0.416668	0.649339
GRO	0.211435	183.141	0.415452
IFN-a2	0.178854	16.0229	0.359743
IFN-g	0.12489	3.4813	0.297611
IL-1b	0.455438	0.156155	0.662456
IL-1ra	0.472773	12.8481	0.670261
IL-2	0.703596	-0.0304753	0.856552
IL-3	0.430158	-0.136992	0.649339
IL-4	0.836299	-4.56251	0.928536
IL-5	0.420042	0.00968849	0.644448
IL-7	0.357206	1.5226	0.597121
IL-8	0.167589	1.8912	0.354151
IL-10	0.0586203	4.42509	0.177445
IL-12 (p40)	0.381645	-6.19526	0.610632
IL-12 (p70)	0.64341	-1.61885	0.815781
IL-15	0.870003	1.14104	0.955298
IL-17A	0.559615	1.68552	0.764352
IP-10	1.0604e-06	230.031	1.18765e-05
MCP-1	0.15315	104.438	0.33633
MCP-3	0.142823	8.28744	0.319923
MDC (CCL22)	0.0248936	-171.215	0.0961407
MIP-1a	0.759879	0.505682	0.886525
MIP-1b	0.578176	-0.355491	0.78019
TGF-a	0.326599	0.775359	0.58062
TNF-a	0.00075305	7.0671	0.00496127
TNF-b	0.0983213	1.76329	0.255123
VEGF	0.61918	12.8155	0.797105
CD3+CD161+	0.00375249	-0.825	0.0210139
CD161+MAITS	0.00538505	-0.21	0.0287203
CD3+CD26+	3.15855e-10	-17.6	7.30591e-09
CD3+CD27+	9.75084e-14	-12.5	1.01124e-11
CD3+ MAITS	0.0505105	0.325	0.157144
Complement C1q	0.0918484	184.966	0.250903
Complement C2	0.0111017	112.745	0.0540605
Complement C3	0.0227468	-2788.61	0.0961407
Complement C3b/iC3b	0.440623	9663.51	0.649339
Complement C4	0.032412	617.491	0.110004
Complement C4b	0.102505	1279	0.255123
Complement C5	0.731833	1002.67	0.881347
Complement C5a	0.179872	31.6487	0.359743
Complement C9	0.102003	-165.555	0.255123
Complement Factor B	0.756793	-1512.84	0.886525
Complement factor D	0.5967	50.5842	0.78624
Complement Factor I	0.373747	-2032.62	0.606662
MBL	0.983917	-753.991	1
