# Supplementary material for: Inflammation and immune activation are associated with risk of Mycobacterium tuberculosis infection in BCG-vaccinated infants
Source: Research Square preprint supplement (doi:10.21203/rs.3.rs-1632594/v1), 2022-05-17
Supplement: Supplementary file 7 [file 905a29831228d33c29935b6c.xlsx]

## Sheet: Supplementary Table 11A
Supplementary Table 11A: Enriched gene sets and corresponding differentially expressed genes for differential expression between TB progressor and non-progressor in adolescents in the ACS. Gene sets enrichment results were acquired by the CERNO algorithm and gene sets defined by Li et.al., Nat. Immunol., 2014 [14].
Upregulated genes in enriched gene sets
ID	N	Genes	Name
LI.M11.0	1	CACNA2D3	enriched in monocytes (II)
LI.S4	0		Monocyte surface signature
LI.M37.0	22	BANK1,LAT,VPREB3,NCAPD2,BLM,CD19,TCL1A,CD72,MSH2,RAD54B,CD3E,ICOSLG,PAX5,SH2D1A,CD7,MCM7,MCM3,CD22,TSPAN2,CACNA2D3,PCBP3,MYO7B	immune activation - generic cluster
LI.M16	0		TLR and inflammatory signaling
LI.M47.0	31	STAP1,BLK,CD72,TSPAN13,BCL11A,CD79B,VPREB3,CD79A,P2RX5,BTLA,IGHM,FCRLA,SPIB,FAM129C,ABCB4,FCRL1,BANK1,MS4A1,FCRL5,CXCR5,CD22,TCL1A,IGHD,CR2,PAX5,E2F5,FCER2,FCRL2,HLA-DOB,PTPRK,CD19	enriched in B cells (I)
LI.M165	0		enriched in activated dendritic cells (II)
LI.M118.0	0		enriched in monocytes (IV)
LI.M5.0	11	PRKCQ,PLCG1,CD247,BTLA,ZAP70,LCK,CTLA4,CARD11,HLA-DOB,CD19,CD3E	regulation of antigen presentation and immune response
LI.M69	16	CR2,TSPAN13,HLA-DOB,CD72,PTPRK,CD22,P2RX5,BTLA,MS4A1,CXCR5,ABCB4,FCRL1,FCRL2,CD79A,CD79B,CD19	enriched in B cells (VI)
LI.M37.1	0		enriched in neutrophils (I)
LI.M127	0		type I interferon response
LI.M4.3	0		myeloid cell enriched receptors and transporters
LI.M209	0		lysosome
LI.M47.1	20	IGHA1,BCL11A,CD79B,CD79A,TPD52,CXCR5,BANK1,MS4A1,FCRL5,BLNK,FCRLA,TCL1A,IGHM,CR2,PAX5,POU2AF1,HLA-DOB,KLF8,PTPRK,CD19	enriched in B cells (II)
LI.M112.0	1	C3	complement activation (I)
LI.M95.1	0		enriched in antigen presentation (III)
LI.M67	0		activated dendritic cells
LI.M113	0		golgi membrane (I)
LI.S11	1	IL3RA	Activated (LPS) dendritic cell surface signature
LI.M11.2	0		formyl peptide receptor mediated neutrophil response
LI.M156.0	19	CD52,IGKV4-1,VPREB3,ITM2C,P2RX5,CPNE5,STAP1,ABCB4,FCRL1,FCRL2,CD22,SPIB,IGHD,BLK,IGLV2-23,OSBPL10,E2F5,TNFRSF17,GNG7	plasma cells & B cells, immunoglobulins
LI.M139	0		lysosomal/endosomal proteins
LI.M111.1	0		viral sensing & immunity; IRF2 targets network (II)
LI.M66	0		TBA
LI.M118.1	0		enriched in monocytes (surface)
LI.M75	0		antiviral IFN signature
LI.M4.0	7	CENPK,TIMELESS,KNTC1,FANCD2,WDHD1,LMNB2,MCM5	cell cycle and transcription
LI.S5	1	LRFN4	DC surface signature
LI.S2	22	TSPAN13,MS4A1,CD22,LY9,PLD4,FCRL3,CR2,ITM2C,CD19,CD72,CD79B,CD79A,BTLA,HLA-DOB,CD52,P2RX5,CXCR5,ABCB4,FCRL1,FCRL2,FCRL5,PTPRK	B cell surface signature
LI.M111.0	0		viral sensing & immunity; IRF2 targets network (I)
LI.M124	0		enriched in membrane proteins
LI.M2.0	4	PDGFRB,AEBP1,PCOLCE,COL6A2	extracellular matrix (I)
LI.M4.13	0		cell junction (GO)
LI.M81	0		enriched in myeloid cells and monocytes
LI.M11.1	0		blood coagulation
LI.M121	4	IGKV4-1,GPR183,CD27,LY9	TBA
LI.M150	0		innate antiviral response
LI.M40	0		complement and other receptors in DCs
LI.M120	5	DGKZ,MAP4K1,SIGIRR,ARHGAP4,GATA3	TBA
LI.M2.1	2	AEBP1,COL6A2	extracellular matrix (II)
LI.M57	6	CTLA4,IL23A,FCER2,IGHD,BLK,CD79A	immuregulation - monocytes, T and B cells
LI.M193	0		TBA
LI.M37.2	0		endoplasmic reticulum
LI.M114.1	0		glycerophospholipid metabolism
LI.M109	3	S1PR1,SYNE2,GATA3	receptors, cell migration
LI.M25	0		TLR8-BAFF network
LI.M89.1	2	NR4A1,DUSP2	putative targets of PAX3
LI.M7.2	21	KLRB1,KLRD1,TBX21,PTGDR,CD247,NLRC3,MYBL1,ARL4C,KLRF1,CTSW,ZAP70,KLRC1,PRKCH,CLIC3,GNLY,SH2D2A,PRF1,PRKCQ,GZMB,CD96,GZMM	enriched in NK cells (I)

## Sheet: Supplementary Table 11B
Supplementary Table 11B: Downregulated genes in enriched gene sets
ID	N	Genes	Name
LI.M11.0	1	CACNA2D3	enriched in monocytes (II)
LI.S4	0		Monocyte surface signature
LI.M37.0	22	BANK1,LAT,VPREB3,NCAPD2,BLM,CD19,TCL1A,CD72,MSH2,RAD54B,CD3E,ICOSLG,PAX5,SH2D1A,CD7,MCM7,MCM3,CD22,TSPAN2,CACNA2D3,PCBP3,MYO7B	immune activation - generic cluster
LI.M16	0		TLR and inflammatory signaling
LI.M47.0	31	STAP1,BLK,CD72,TSPAN13,BCL11A,CD79B,VPREB3,CD79A,P2RX5,BTLA,IGHM,FCRLA,SPIB,FAM129C,ABCB4,FCRL1,BANK1,MS4A1,FCRL5,CXCR5,CD22,TCL1A,IGHD,CR2,PAX5,E2F5,FCER2,FCRL2,HLA-DOB,PTPRK,CD19	enriched in B cells (I)
LI.M165	0		enriched in activated dendritic cells (II)
LI.M118.0	0		enriched in monocytes (IV)
LI.M5.0	11	PRKCQ,PLCG1,CD247,BTLA,ZAP70,LCK,CTLA4,CARD11,HLA-DOB,CD19,CD3E	regulation of antigen presentation and immune response
LI.M69	16	CR2,TSPAN13,HLA-DOB,CD72,PTPRK,CD22,P2RX5,BTLA,MS4A1,CXCR5,ABCB4,FCRL1,FCRL2,CD79A,CD79B,CD19	enriched in B cells (VI)
LI.M37.1	0		enriched in neutrophils (I)
LI.M127	0		type I interferon response
LI.M4.3	0		myeloid cell enriched receptors and transporters
LI.M209	0		lysosome
LI.M47.1	20	IGHA1,BCL11A,CD79B,CD79A,TPD52,CXCR5,BANK1,MS4A1,FCRL5,BLNK,FCRLA,TCL1A,IGHM,CR2,PAX5,POU2AF1,HLA-DOB,KLF8,PTPRK,CD19	enriched in B cells (II)
LI.M112.0	1	C3	complement activation (I)
LI.M95.1	0		enriched in antigen presentation (III)
LI.M67	0		activated dendritic cells
LI.M113	0		golgi membrane (I)
LI.S11	1	IL3RA	Activated (LPS) dendritic cell surface signature
LI.M11.2	0		formyl peptide receptor mediated neutrophil response
LI.M156.0	19	CD52,IGKV4-1,VPREB3,ITM2C,P2RX5,CPNE5,STAP1,ABCB4,FCRL1,FCRL2,CD22,SPIB,IGHD,BLK,IGLV2-23,OSBPL10,E2F5,TNFRSF17,GNG7	plasma cells & B cells, immunoglobulins
LI.M139	0		lysosomal/endosomal proteins
LI.M111.1	0		viral sensing & immunity; IRF2 targets network (II)
LI.M66	0		TBA
LI.M118.1	0		enriched in monocytes (surface)
LI.M75	0		antiviral IFN signature
LI.M4.0	7	CENPK,TIMELESS,KNTC1,FANCD2,WDHD1,LMNB2,MCM5	cell cycle and transcription
LI.S5	1	LRFN4	DC surface signature
LI.S2	22	TSPAN13,MS4A1,CD22,LY9,PLD4,FCRL3,CR2,ITM2C,CD19,CD72,CD79B,CD79A,BTLA,HLA-DOB,CD52,P2RX5,CXCR5,ABCB4,FCRL1,FCRL2,FCRL5,PTPRK	B cell surface signature
LI.M111.0	0		viral sensing & immunity; IRF2 targets network (I)
LI.M124	0		enriched in membrane proteins
LI.M2.0	4	PDGFRB,AEBP1,PCOLCE,COL6A2	extracellular matrix (I)
LI.M4.13	0		cell junction (GO)
LI.M81	0		enriched in myeloid cells and monocytes
LI.M11.1	0		blood coagulation
LI.M121	4	IGKV4-1,GPR183,CD27,LY9	TBA
LI.M150	0		innate antiviral response
LI.M40	0		complement and other receptors in DCs
LI.M120	5	DGKZ,MAP4K1,SIGIRR,ARHGAP4,GATA3	TBA
LI.M2.1	2	AEBP1,COL6A2	extracellular matrix (II)
LI.M57	6	CTLA4,IL23A,FCER2,IGHD,BLK,CD79A	immuregulation - monocytes, T and B cells
LI.M193	0		TBA
LI.M37.2	0		endoplasmic reticulum
LI.M114.1	0		glycerophospholipid metabolism
LI.M109	3	S1PR1,SYNE2,GATA3	receptors, cell migration
LI.M25	0		TLR8-BAFF network
LI.M89.1	2	NR4A1,DUSP2	putative targets of PAX3
LI.M7.2	21	KLRB1,KLRD1,TBX21,PTGDR,CD247,NLRC3,MYBL1,ARL4C,KLRF1,CTSW,ZAP70,KLRC1,PRKCH,CLIC3,GNLY,SH2D2A,PRF1,PRKCQ,GZMB,CD96,GZMM	enriched in NK cells (I)
