# Supplementary material for: Inflammation and immune activation are associated with risk of Mycobacterium tuberculosis infection in BCG-vaccinated infants
Source: Research Square preprint supplement (doi:10.21203/rs.3.rs-1632594/v1), 2022-05-17
Supplement: Supplementary file 8 [file a5244dca915f5119c5d20ed6.xlsx]

## Sheet: Supp. Table 4
Supplementary Table 4: Baseline characteristics of participant by M.tb infection *
Characteristic	Cases (n=43)	Controls (n=127)
Weight centile mean(SD**)	39 (26.5)	39 (27.7)
Height (cm) mean(SD)	62.6 (2.5)	62.5 (2.3)
Enrolment age (months) mean(SD)	4.8 (0.5)	4.8 (0.5)
Day of data collection (Plasma)
D-7	24	126
D28	17	0
Missing	2	1
Male	27 (62.8)	62 (48.8)
Race
Black	14 (32.6)	34 (26.8)
Coloured	29 (67.4)	93 (73.2)
Allocated to received MVA85A in original trial	17 (39.5)	69 (54.3)
* Baseline characteristics have been presented for cases and controls separately
** Standard deviation
