# Supplementary material for: Inflammation and immune activation are associated with risk of Mycobacterium tuberculosis infection in BCG-vaccinated infants
Source: Research Square preprint supplement (doi:10.21203/rs.3.rs-1632594/v1), 2022-05-17
Supplement: Supplementary file 9 [file e84cb9674296487def6c7765.xlsx]

## Sheet: Supplementary Table 1A-B
Supplementary Table 1A: Cellular and humoral assays performed on samples from study subjects
Assay *	Antigen/Cell population/cytokine
Cellular assays
ELISPOT	BCG, CMV, PPD, EBV, unstimulated and SEB
MGIA	MGIA 1x10^6 and MGIA 3x10^6 cultured with BCG
Flow Cytometry	T cell phenotyping
Flow Cytometry	B cell phenotyping
Flow Cytometry	MAIT cells phenotyping
Gene expression	BCG-stimulated and unstimulated
Flow Cytometry	Gamma delta cells
Multiplex Assay (Luminex)	plasma cytokines and chemokines (sCD40L, EGF, Eotaxin/CCL11, FGF-2, Flt-3 ligand, Fractalkine, G-CSF, GM-CSF, GRO, IFN-α2, IFN-γ, IL-1α, IL-1β, IL-1ra, IL-2, IL-3, IL-4, IL-5, IL-6, IL-7, IL-8, IL-9, IL-10, IL-12 (p40), IL-12 (p70), IL-13, IL-15, IL-17A, IP-10, MCP-1, MCP-3, MDC (CCL22), MIP-1α, MIP-1β, TGF-α, TNF-α, TNF-β, VEGF
Humoral assays
ELISA	IgG to: Ag85A and whole cell lysate
* Details of the performed assays are in the methods section
Supplementary Table 1B: Percentages of samples that had all planned assays performed, based on cells availability for the assays
	% Samples with all planned cellular assays performed
Run
1	0.536
2	0.607
3	0.852
4	0.5
5	0.519
6	0.759
