# Supplementary material for: Inflammation and immune activation are associated with risk of Mycobacterium tuberculosis infection in BCG-vaccinated infants
Source: Research Square preprint supplement (doi:10.21203/rs.3.rs-1632594/v1), 2022-05-17
Supplement: Supplementary file 10 [file ffeda7a2ecf4d975d558a497.xlsx]

## Sheet: Supplementary Table2
Supplementary Table 2: Flow cytometry panels to characterize T, B and MAIT cells populations
1. T cell phenotyping panel
Marker	Fluorochrome	Clone
Viability	Aqua
CD3	AF700	UCHT1
CD4	APC	RPA-T4
CD8	BV605	RPA-T8
CD14	PECY7	HCD14
CD16	AF488	3G8
CD25	APC-CY7	BC96
PD1	BV421	EH12.2H7
CD127	BV650	A019D5
CD56	BV785	5.1H11
HLA-DR	PE	L243
CD19	PECY5	B4
2. B cell phenotyping panel
Marker	Fluorochrome	Clone
Viability	Aqua
CD3	BV510	UCHT1
CD19	PECy7	SJ25C1
CD21	VioBlue	HB5
CD27	BV650	O323
CD38	PECy5	HIT2
CD20	APC-Cy7	2H7
CD24	FITC	SN3
CD5	APC	UCHT2
IgD	PE	IA6-2
CD10	BV785	HI10a
IgG	BV605	G18-145
3. MAIT cell phenotyping panel
Marker	Fluorochrome	Clone
Viability	Aqua
CD19	BV510	HIB19
CD3	AF700	UCHT1
CD4	FITC	RPA-T4
CD8	APCH7	SK1
CD14	PECY7	HCD14
CD26	PE	BA5b
CD27	BV605	O323
Valpha7.2	BV421	3C10
CD161	APC	HP-3G10
CD163	PERCPCY5.5	GHI/61
HLADR	BV650	L243
